# Supplementary material for: Identification of Treculia africana L. varieties using Internal Transcribed Spacer Region 1 (ITS 1) and Internal Transcribed Spacer Region 2 (ITS 2) DNA barcodes
Source: Research Square preprint supplement (doi:10.21203/rs.3.rs-4355610/v1), 2024-05-21
Supplement: Supplementary file 1 [file e722d77db0cb54b9a9703ef2.xlsx]

## Sheet: Info
Title	Phylogenetic Analysis
Format
DataType	Nucleotide
CodeTable	Standard
74
Number Sites	1174
Identical	.
Missing	?
Indel	-

## Sheet: Sequence Data
Additional file 3
COEFFICIENT OF DIFFERENTIATION SHOWING TOTAL SITES IN MULTIPLE ALIGNMENTS OF ARTOCARPUS ALTILIS AND ACCESSIONS OF TRECULIA AFRICANA var AFRICANA
Domain: Data Coding Codon Start: 1
										1	1	1	1	1	1	1	1	1	1	2	2	2	2	2	2	2	2	2	2	3	3	3	3	3	3	3	3	3	3	4	4	4	4	4	4	4	4	4	4
	1	2	3	4	5	6	7	8	9	0	1	2	3	4	5	6	7	8	9	0	1	2	3	4	5	6	7	8	9	0	1	2	3	4	5	6	7	8	9	0	1	2	3	4	5	6	7	8	9
Ab1	-1	0	0	0	-	-	-	-	-	-	-	-	-	-	-	-	-	-	-	-	-	-	-	-	-	-	-	-	-	-	-	-	-	-	-	-	-	-	-	-	-	-	-	-	-	-	-	-	-
Ab2	-1	0	0	0	-	-	-	-	-	-	-	-	-	-	-	-	-	-	-	-	-	-	-	-	-	-	-	-	-	-	-	-	-	-	-	-	-	-	-	-	-	-	T	T	T	A	A	C	A
Ab3	-1	0	0	0	-	-	-	-	-	-	-	-	-	-	-	-	-	-	-	-	-	-	-	-	-	-	-	-	-	-	-	-	-	-	-	-	-	-	-	-	-	-	-	-	-	-	-	-	-
Ab4	-1	0	0	0	-	-	-	-	-	-	-	-	-	-	-	-	-	-	-	-	-	-	-	-	-	-	-	-	-	-	-	-	-	-	-	-	-	-	-	-	-	-	-	-	-	-	-	-	-
Ab6	-1	0	0	0	-	-	-	-	-	-	-	-	-	-	-	-	-	-	-	-	-	-	-	-	-	-	-	-	-	-	-	-	-	-	-	-	-	-	-	-	-	-	-	-	-	-	-	-	-
Ab7	-1	0	0	0	-	-	-	-	-	-	-	-	-	-	-	-	-	-	-	-	-	-	-	-	-	-	-	-	-	-	-	-	-	-	-	-	-	-	-	-	-	T	W	W	T	A	A	Y	A
Ab8	-1	0	0	0	-	-	-	-	-	-	-	-	-	-	-	-	-	-	-	-	-	-	-	-	-	-	-	-	-	-	-	-	-	-	-	-	-	-	-	-	-	-	-	-	-	-	-	-	-
Ab9	-1	0	0	0	-	-	-	-	-	-	-	-	-	-	-	-	-	-	-	-	-	-	-	-	-	-	-	-	-	-	-	-	-	-	-	-	-	-	-	-	-	-	-	-	-	-	-	-	-
Ab10	-1	0	0	0	-	-	-	-	-	-	-	-	-	-	-	-	-	-	-	-	-	-	-	-	-	-	-	-	-	-	-	-	-	-	-	-	-	-	-	-	-	-	T	T	M	T	W	C	W
Ab11	-1	0	0	0	-	-	-	-	-	-	-	-	-	-	-	-	-	-	-	-	-	-	-	-	-	-	-	-	-	-	-	-	-	-	-	-	-	-	-	-	-	-	-	-	-	-	-	-	-
Ab12	-1	0	0	0	-	-	-	-	-	-	-	-	-	-	-	-	-	-	-	-	-	-	-	-	-	-	-	-	-	-	-	-	-	-	-	-	-	-	-	-	-	-	-	T	M	T	W	C	A
Ab13	-1	0	0	0	-	-	-	-	-	-	-	-	-	-	-	-	-	-	-	-	-	-	-	-	-	-	-	-	-	-	-	-	-	-	-	-	-	-	-	-	-	-	-	-	-	-	-	-	-
Ab14	-1	0	0	0	-	-	-	-	-	-	-	-	-	-	-	-	-	-	-	-	-	-	-	-	-	-	-	-	-	-	-	-	-	-	-	-	-	-	-	-	-	-	-	-	-	-	-	-	-
G16	-1	0	0	0	-	-	-	-	-	-	-	-	-	-	-	-	-	-	-	-	-	-	-	-	-	-	-	-	-	-	-	-	-	-	-	-	-	-	-	-	-	-	-	-	-	-	-	-	-
G17	-1	0	0	0	-	-	-	-	-	-	-	-	-	-	-	-	-	-	-	-	-	-	-	-	-	-	-	-	-	-	-	-	-	-	-	-	-	-	-	-	-	-	T	T	T	A	A	C	A
Ab19	-1	0	0	0	-	-	-	-	-	-	-	-	-	-	-	-	-	-	-	-	-	-	-	-	-	-	-	-	-	-	-	-	-	-	-	-	-	-	-	-	T	T	T	T	M	W	A	C	W
Ab20	-1	0	0	0	-	-	-	-	-	-	-	-	-	-	-	-	-	-	-	-	-	-	-	-	-	-	-	-	-	-	-	-	-	-	-	-	-	-	-	-	-	-	C	T	C	A	A	C	A
Ab21	-1	0	0	0	-	-	-	-	-	-	-	-	-	-	-	-	-	-	-	-	-	-	-	-	-	-	-	-	-	-	-	-	-	-	-	-	-	-	-	-	T	W	A	C	A	A	A	C	A
B22	-1	0	0	0	-	-	-	-	-	-	-	-	-	-	-	-	-	-	-	-	-	-	-	-	-	-	-	-	-	-	-	-	-	-	-	-	-	-	-	-	-	-	-	-	-	-	-	-	-
B24	-1	0	0	0	-	-	-	-	-	-	-	-	-	-	-	-	-	-	-	-	-	-	-	-	-	-	-	-	-	-	-	-	-	-	-	-	-	-	-	-	-	-	-	-	-	A	W	Y	A
B25	-1	0	0	0	-	-	-	-	-	-	-	-	-	-	-	-	-	-	-	-	-	-	-	-	-	-	-	-	-	-	-	-	-	-	-	-	-	-	-	-	-	-	T	W	A	A	A	M	A
B26	-1	0	0	0	-	-	-	-	-	-	-	-	-	-	-	-	-	-	-	-	-	-	-	-	-	-	-	-	-	-	-	-	-	-	-	-	-	-	-	-	-	T	A	T	A	A	A	C	A
B27	-1	0	0	0	-	-	-	-	-	-	-	-	-	-	-	-	-	-	-	-	-	-	-	-	-	-	-	-	-	-	-	-	-	-	-	-	-	-	-	-	-	-	-	-	-	-	-	-	-
B28	-1	0	0	0	-	-	-	-	-	-	-	-	-	-	-	-	-	-	-	-	-	-	-	-	-	-	-	-	-	-	-	-	-	-	-	-	-	-	-	-	-	T	T	T	T	W	W	C	A
B29	-1	0	0	0	-	-	-	-	-	-	-	-	-	-	-	-	-	-	-	-	-	-	-	-	-	-	-	-	-	-	-	-	-	-	-	-	-	-	-	-	-	-	-	-	-	-	-	-	-
B30	-1	0	0	0	-	-	-	-	-	-	-	-	-	-	-	-	-	-	-	-	-	-	-	-	-	-	-	-	-	-	-	-	-	-	-	-	-	-	-	-	-	-	T	W	T	A	T	A	A
B32	-1	0	0	0	-	-	-	-	-	-	-	-	-	-	-	-	-	-	-	-	-	-	-	-	-	-	-	-	-	-	-	-	-	-	-	-	-	-	-	-	-	-	-	-	-	-	-	-	-
B33	-1	0	0	0	-	-	-	-	-	-	-	-	-	-	-	-	-	-	-	-	-	-	-	-	-	-	-	-	-	-	-	-	-	-	-	-	-	-	-	-	-	-	-	-	-	-	A	C	A
B34	-1	0	0	0	-	-	-	-	-	-	-	-	-	-	-	-	-	-	-	-	-	-	-	-	-	-	-	-	-	-	-	-	-	-	-	-	-	-	-	-	-	-	-	-	-	-	-	C	A
B35	-1	0	0	0	-	-	-	-	-	-	-	-	-	-	-	-	-	-	-	-	-	-	-	-	-	-	-	-	-	-	-	-	-	-	-	-	-	-	-	-	-	-	-	-	-	-	-	-	-
B36	-1	0	0	0	-	-	-	-	-	-	-	-	-	-	-	-	-	-	-	-	-	-	-	-	-	-	-	-	-	-	-	-	-	-	-	-	-	-	-	-	-	-	-	-	T	A	A	C	A
B37	-1	0	0	0	-	-	-	-	-	-	-	-	-	-	-	-	-	-	-	-	-	-	-	-	-	-	-	-	-	-	-	-	-	-	-	-	-	-	-	-	-	-	T	T	T	A	W	Y	T
B38	-1	0	0	0	-	-	-	-	-	-	-	-	-	-	-	-	-	-	-	-	-	-	-	-	-	-	-	-	-	-	-	-	-	-	-	-	-	-	-	-	-	-	-	T	T	A	T	C	A
B39	-1	0	0	0	-	-	-	-	-	-	-	-	-	-	-	-	-	-	-	-	-	-	-	-	-	-	-	-	-	-	-	-	-	-	-	-	-	-	-	-	-	-	-	-	-	-	-	-	-
B41	-1	0	0	0	-	-	-	-	-	-	-	-	-	-	-	-	-	-	-	-	-	-	-	-	-	-	-	-	-	-	-	-	-	-	-	-	-	-	-	-	-	-	-	-	-	-	-	-	-
B42	-1	0	0	0	-	-	-	-	-	-	-	-	-	-	-	-	-	-	-	-	-	-	-	-	-	-	-	-	-	-	-	-	-	-	-	-	-	-	-	-	-	-	-	T	T	A	A	C	A
B43	-1	0	0	0	-	-	-	-	-	-	-	-	-	-	-	-	-	-	-	-	-	-	-	-	-	-	-	-	-	-	-	-	-	-	-	-	-	-	-	-	-	-	-	-	-	-	-	-	-
B44	-1	0	0	0	-	-	-	-	-	-	-	-	-	-	-	-	-	-	-	-	-	-	-	-	-	-	-	-	-	-	-	-	-	-	-	-	-	-	-	-	-	-	-	-	T	A	A	C	A
D48	-1	0	0	0	-	-	-	-	-	-	-	-	-	-	-	-	-	-	-	-	-	-	-	-	-	-	-	-	-	-	-	-	-	-	-	-	-	-	-	-	-	-	-	-	-	A	A	C	A
D49	-1	0	0	0	-	-	-	-	-	-	-	-	-	-	-	-	-	-	-	-	-	-	-	-	-	-	-	-	-	-	-	-	-	-	-	-	-	-	-	-	G	G	G	G	T	A	A	C	A
D50	-1	0	0	0	-	-	-	-	-	-	-	-	-	-	-	-	-	-	-	-	-	-	-	-	-	-	-	-	-	-	-	-	-	-	-	-	-	-	-	-	-	-	-	-	T	A	A	C	W
D51	-1	0	0	0	-	-	-	-	-	-	-	-	-	-	-	-	-	-	-	-	-	-	-	-	-	-	-	-	-	-	-	-	-	-	-	-	-	-	-	-	-	-	-	-	-	-	-	-	-
D52	-1	0	0	0	-	-	-	-	-	-	-	-	-	-	-	-	-	-	-	-	-	-	-	-	-	-	-	-	-	-	-	-	-	-	-	-	-	-	-	-	-	-	-	-	T	A	A	C	A
D53	-1	0	0	0	-	-	-	-	-	-	-	-	-	-	-	-	-	-	-	-	-	-	-	-	-	-	-	-	-	-	-	-	-	-	-	-	-	-	-	-	-	-	-	-	-	-	A	C	A
D54	-1	0	0	0	-	-	-	-	-	-	-	-	-	-	-	-	-	-	-	-	-	-	-	-	-	-	-	-	-	-	-	-	-	-	-	-	-	-	-	-	-	-	-	-	-	-	A	C	A
D55	-1	0	0	0	-	-	-	-	-	-	-	-	-	-	-	-	-	-	-	-	-	-	-	-	-	-	-	-	-	-	-	-	-	-	-	-	-	-	-	-	-	-	-	-	-	-	-	-	-
D56	-1	0	0	0	-	-	-	-	-	-	-	-	-	-	-	-	-	-	-	-	-	-	-	-	-	-	-	-	-	-	-	-	-	-	-	-	-	-	-	G	C	T	A	A	C	A	A	S	G
E57	-1	0	0	0	-	-	-	-	-	-	-	-	-	-	-	-	-	-	-	-	-	-	-	-	-	-	-	-	-	-	-	-	-	-	-	-	-	-	-	-	-	-	-	-	-	-	A	Y	A
E58	-1	0	0	0	-	-	-	-	-	-	-	-	-	-	-	-	-	-	-	-	-	-	-	-	-	-	-	-	-	-	-	-	-	-	-	-	-	-	-	-	-	-	-	-	T	A	W	Y	A
F59	-1	0	0	0	-	-	-	-	-	-	-	-	-	-	-	-	-	-	-	-	-	-	-	-	-	-	-	-	-	-	-	-	-	-	-	-	-	-	-	-	-	-	-	-	-	A	A	C	A
F60	-1	0	0	0	-	-	-	-	-	T	T	W	M	T	T	A	C	W	T	T	W	Y	C	T	T	G	G	T	T	K	S	C	K	T	A	G	C	G	G	A	S	G	S	A	K	S	G	A	T
F61	-1	0	0	0	-	-	-	-	-	-	-	-	-	-	-	-	-	-	-	-	-	-	-	-	-	-	-	-	-	-	-	-	-	-	-	-	-	-	-	-	-	-	-	-	T	A	W	C	A
F62	-1	0	0	0	-	-	-	-	-	-	-	-	-	-	-	-	-	-	-	-	-	-	-	-	-	-	-	-	-	-	-	-	-	-	-	-	-	-	-	-	-	-	-	-	-	A	A	C	A
F63	-1	0	0	0	-	-	-	-	-	-	-	-	-	-	-	-	-	-	-	-	-	-	-	-	-	-	-	-	-	-	-	-	-	-	-	-	-	-	-	-	-	-	-	-	-	-	-	-	-
G64	-1	0	0	0	-	-	-	-	-	-	-	-	-	-	-	-	-	-	-	-	-	-	-	-	-	-	-	-	-	-	-	-	-	-	-	-	-	-	-	-	-	-	-	-	T	A	A	C	A
G65	-1	0	0	0	-	-	-	-	-	-	-	-	-	-	-	-	-	-	-	-	-	-	-	-	-	-	-	-	-	-	-	-	-	-	-	-	-	-	-	-	-	-	-	-	-	A	A	C	A
G66	-1	0	0	0	-	-	-	-	-	-	-	-	-	-	-	-	-	-	-	-	-	-	-	-	-	-	-	-	-	-	-	-	-	-	-	-	-	-	-	-	-	-	-	-	T	A	W	C	A
G67	-1	0	0	0	-	-	-	-	-	-	-	-	-	-	-	-	-	-	-	-	-	-	-	-	-	-	-	-	-	-	-	-	-	-	-	A	W	G	G	G	T	Y	T	T	A	A	C	A	A
G68	-1	0	0	0	-	-	-	-	-	-	-	-	-	-	-	-	-	-	-	-	-	-	-	-	-	-	-	-	-	-	-	-	-	-	-	-	-	-	-	-	-	-	-	-	-	A	A	C	A
G69	-1	0	0	0	-	-	-	-	-	-	-	-	-	-	-	-	-	-	-	-	-	-	-	-	-	-	-	-	-	-	-	-	-	-	-	-	-	-	-	-	-	-	-	T	C	W	A	C	A
G70	-1	0	0	0	-	-	-	-	-	-	-	-	-	-	-	-	-	-	-	-	-	-	-	-	-	-	-	-	-	-	-	-	-	-	-	-	-	-	-	-	-	-	A	A	C	A	A	G	G
J74	-1	0	0	0	-	-	-	-	-	-	-	-	-	-	-	-	-	-	-	-	-	-	-	-	-	-	-	-	-	-	T	A	T	M	A	A	R	R	A	K	T	T	T	R	T	A	A	C	A
J76	-1	0	0	0	-	-	-	-	-	-	-	-	-	-	-	-	-	-	-	-	-	-	-	-	-	-	-	-	-	-	-	-	-	-	-	-	-	-	-	-	-	-	-	-	-	A	A	C	A
J77	-1	0	0	0	-	-	-	-	-	-	-	-	-	-	-	-	-	-	-	-	-	-	-	-	-	-	-	-	-	-	-	-	-	-	-	-	-	-	-	-	-	-	-	-	-	A	A	C	A
J78	-1	0	0	0	-	-	-	-	-	-	-	-	-	-	-	-	-	-	-	-	-	-	-	-	-	-	-	-	-	-	-	-	-	-	-	-	-	-	-	-	-	-	-	T	T	A	A	C	A
J79	-1	0	0	0	-	-	-	-	-	-	-	-	-	-	-	-	-	-	-	-	-	-	-	-	-	-	-	-	-	-	-	-	-	-	-	-	-	-	-	-	-	-	-	T	T	T	A	M	A
J80	-1	0	0	0	-	-	-	-	-	-	-	-	-	-	-	-	-	-	-	-	-	-	-	-	-	-	-	-	-	-	-	-	-	-	-	-	-	-	-	-	-	T	T	T	T	W	A	C	A
J81	-1	0	0	0	T	A	A	C	W	A	A	R	C	A	A	G	G	T	T	T	G	G	G	T	A	G	C	T	G	A	M	C	S	T	A	G	G	G	A	A	G	G	A	T	C	A	G	A	G
J82	-1	0	0	0	-	-	-	-	-	-	-	-	-	-	-	-	-	-	-	-	-	-	-	-	-	-	-	-	-	-	-	-	-	-	-	-	-	-	-	-	-	-	-	T	T	A	A	C	A
J83	-1	0	0	0	-	-	-	-	-	-	-	-	-	-	-	-	-	-	-	-	-	-	-	-	-	-	-	-	-	-	-	-	-	-	-	-	-	-	-	-	-	-	-	-	-	A	W	C	A
J84	-1	0	0	0	-	-	-	-	-	-	-	-	-	-	-	-	-	-	-	-	-	-	-	-	-	-	-	-	-	-	-	-	-	-	-	-	-	-	-	-	-	-	-	-	-	-	A	C	A
J85	-1	0	0	0	-	-	-	-	-	-	-	-	-	-	-	-	-	-	-	-	-	-	-	-	-	-	-	-	-	-	-	-	-	-	-	-	-	-	-	-	-	-	-	-	T	A	W	C	A
F86	-1	0	0	0	-	-	-	-	-	-	-	-	-	-	-	-	-	-	-	-	-	-	-	-	-	-	-	-	-	-	-	-	-	-	-	-	-	-	-	-	-	-	-	-	T	W	A	C	A
KU855474.1	-1	0	0	0	-	-	-	-	-	-	-	-	-	-	-	-	-	-	-	-	-	-	-	-	-	-	-	-	-	-	-	-	-	-	-	-	-	-	-	-	-	-	-	-	-	-	-	-	-
																						1	1	1	1	1	1	1	1	1	1	1	1	1	1	1	1	1	1	1	1	1	1	1	1	1	1	1	1
	7	8	8	8	8	8	8	8	8	8	8	9	9	9	9	9	9	9	9	9	9	0	0	0	0	0	0	0	0	0	0	1	1	1	1	1	1	1	1	1	1	2	2	2	2	2	2	2	2
	9	0	1	2	3	4	5	6	7	8	9	0	1	2	3	4	5	6	7	8	9	0	1	2	3	4	5	6	7	8	9	0	1	2	3	4	5	6	7	8	9	0	1	2	3	4	5	6	7
Ab1	-1	0	0	0	T	C	C	G	T	A	G	G	T	G	A	A	C	C	T	G	C	G	G	A	-	-	-	-	-	-	-	A	G	G	A	T	C	A	T	T	A	C	C	G	A	G	T	G	T
Ab2	-1	0	0	0	.	.	.	.	.	.	.	.	.	.	.	.	.	.	.	.	.	.	A	.	-	-	-	-	-	-	-	.	.	.	.	.	.	.	.	.	.	.	.	.	.	.	.	.	-
Ab3	-1	0	0	0	.	.	.	.	.	.	.	.	.	.	.	.	.	.	.	.	.	.	.	.	-	-	-	-	-	-	-	.	.	A	.	.	.	.	.	.	G	.	A	.	.	.	A	.	.
Ab4	-1	0	0	0	.	.	.	.	.	.	A	.	G	.	.	.	.	.	.	.	.	.	.	.	-	-	-	-	-	-	A	.	.	-	.	A	.	.	A	.	.	.	.	.	.	A	.	.	-
Ab6	-1	0	0	0	.	T	G	.	.	.	.	.	.	.	G	.	A	G	G	A	T	C	A	.	-	-	-	-	-	-	-	-	.	.	.	.	.	.	.	.	G	G	G	C	.	.	.	.	.
Ab7	-1	0	0	0	.	G	.	.	.	.	.	.	G	.	.	.	.	.	.	.	.	.	.	.	-	-	-	-	-	-	-	.	.	.	.	.	.	.	.	.	.	.	.	.	.	.	.	.	.
Ab8	-1	0	0	0	-	-	-	-	-	-	-	-	-	-	-	-	-	-	-	-	-	-	-	-	-	-	-	-	-	-	-	-	-	-	-	-	-	-	-	-	-	-	-	-	-	-	-	-	-
Ab9	-1	0	0	0	-	-	-	-	-	-	-	-	-	-	-	-	-	-	-	-	-	-	-	-	-	-	-	-	-	-	-	-	-	-	-	-	-	-	-	-	-	-	-	-	-	-	-	-	-
Ab10	-1	0	0	0	A	T	.	A	.	T	A	C	C	.	.	G	T	G	.	T	T	.	.	.	C	T	G	C	G	G	A	.	.	.	.	.	.	.	.	.	.	.	.	.	.	.	.	.	-
Ab11	-1	0	0	0	-	T	T	A	.	T	M	T	.	A	.	.	T	T	C	A	S	C	.	G	-	-	-	-	-	-	-	-	.	T	.	.	.	C	C	.	.	.	M	T	G	A	.	C	-
Ab12	-1	0	0	0	A	T	.	A	.	T	A	C	C	.	.	G	T	G	.	T	T	.	.	.	T	G	G	-	-	G	A	.	.	.	.	.	.	.	.	.	.	.	.	.	.	.	.	.	-
Ab13	-1	0	0	0	-	T	T	T	.	K	C	T	.	A	.	.	T	T	.	A	K	S	.	G	-	-	-	-	-	-	-	-	.	T	.	.	A	C	C	C	.	.	.	.	G	.	.	T	-
Ab14	-1	0	0	0	.	A	T	.	.	T	T	S	C	.	G	T	G	G	C	C	.	.	.	.	T	C	-	-	-	-	-	.	T	.	.	Y	T	G	A	G	T	S	.	.	G	.	C	C	C
G16	-1	0	0	0	-	-	-	-	-	-	-	-	-	-	-	-	-	-	-	-	-	-	-	-	-	-	-	-	-	-	-	-	-	-	-	-	-	-	-	-	-	-	-	-	-	-	-	-	-
G17	-1	0	0	0	.	.	T	.	.	.	.	.	.	.	T	T	.	.	.	.	.	.	.	.	-	-	-	-	-	-	-	.	.	.	.	.	.	.	.	G	.	A	G	.	.	.	.	T	-
Ab19	-1	0	0	0	.	.	.	.	.	.	.	.	.	.	.	.	.	.	.	.	.	.	.	.	-	-	-	-	-	-	-	.	.	.	.	.	.	.	.	.	.	.	.	.	.	.	.	.	-
Ab20	-1	0	0	0	.	Y	M	.	.	.	.	.	.	.	.	M	.	.	.	.	.	.	.	.	-	-	-	-	-	-	-	.	.	R	.	.	.	.	.	.	.	.	.	.	.	.	.	.	-
Ab21	-1	0	0	0	.	.	G	.	.	.	.	.	.	.	.	.	.	T	.	.	.	.	.	.	-	-	-	-	-	-	-	.	.	.	.	.	.	.	.	.	.	.	.	.	.	.	.	.	-
B22	-1	0	0	0	.	T	T	C	.	.	.	A	G	.	.	.	.	.	C	C	T	.	.	.	-	-	-	-	-	-	-	.	A	.	G	.	A	.	.	A	T	T	.	S	.	.	W	.	.
B24	-1	0	0	0	.	.	.	.	.	.	.	.	.	.	.	.	.	.	.	.	.	.	.	.	-	-	-	-	-	-	A	G	.	-	.	.	.	.	.	.	.	.	.	.	.	.	.	.	-
B25	-1	0	0	0	.	.	T	.	.	.	.	.	.	.	.	.	.	.	.	.	.	.	.	.	-	-	-	-	-	-	-	.	.	.	.	.	.	.	.	.	.	.	.	.	.	.	.	.	-
B26	-1	0	0	0	.	.	G	.	.	.	.	.	.	.	.	.	.	.	.	.	.	.	.	.	-	-	-	-	-	-	-	.	.	.	.	.	.	.	.	.	.	.	.	.	.	.	.	.	-
B27	-1	0	0	0	-	-	-	-	-	-	-	-	-	-	-	-	-	-	-	-	-	-	-	-	-	-	-	-	-	-	-	-	-	-	-	-	-	-	-	-	-	-	-	-	-	-	-	-	-
B28	-1	0	0	0	.	.	.	.	.	.	.	.	.	.	.	.	.	.	.	.	.	.	.	.	-	-	-	-	-	-	-	.	.	.	.	.	.	.	.	.	.	.	.	.	.	.	.	.	G
B29	-1	0	0	0	-	-	-	-	-	-	-	-	-	-	-	-	-	-	-	-	-	-	-	-	-	-	-	-	-	-	-	-	-	-	-	-	-	-	-	-	-	-	-	-	-	-	-	-	-
B30	-1	0	0	0	.	T	T	.	.	.	.	.	G	.	.	.	.	.	C	.	.	.	.	.	-	-	-	-	-	-	-	.	A	.	.	.	.	.	.	.	T	.	.	.	.	.	A	.	.
B32	-1	0	0	0	A	G	G	A	.	C	A	T	.	A	C	-	-	-	.	.	.	.	.	.	-	-	-	-	-	-	A	G	.	-	.	.	.	.	.	.	.	.	.	.	.	.	.	.	-
B33	-1	0	0	0	-	.	.	.	.	.	.	.	.	.	.	.	.	.	.	.	.	.	.	.	-	-	-	-	-	-	A	G	.	-	.	.	.	.	.	.	.	.	.	.	.	.	.	.	-
B34	-1	0	0	0	.	-	-	.	.	.	.	T	A	.	.	.	.	G	G	.	.	.	.	.	-	-	-	-	-	-	-	G	.	A	G	G	.	.	.	.	C	.	T	.	.	.	G	.	A
B35	-1	0	0	0	G	A	A	.	.	.	T	T	A	A	.	.	.	.	.	T	.	.	.	.	-	-	-	-	-	-	-	.	.	T	.	.	.	.	A	.	C	.	.	.	.	.	G	.	A
B36	-1	0	0	0	.	A	A	.	.	.	.	.	.	.	.	.	.	.	.	.	G	.	.	.	-	-	-	-	-	-	-	.	.	.	.	.	.	.	.	A	.	.	.	.	.	.	.	.	-
B37	-1	0	0	0	.	.	.	.	.	.	.	.	.	.	.	.	.	.	.	.	.	.	.	.	-	-	-	-	-	-	A	G	.	-	.	.	.	.	.	.	.	.	.	.	.	.	.	.	-
B38	-1	0	0	0	.	T	T	T	.	.	.	.	.	.	.	.	.	.	.	.	.	.	.	.	-	-	-	-	-	-	-	.	.	.	.	A	.	.	.	.	C	.	.	.	.	.	A	.	-
B39	-1	0	0	0	.	.	.	.	.	.	.	.	.	.	.	.	.	.	.	.	.	.	.	.	-	-	-	-	-	-	A	G	.	-	.	.	.	.	.	.	T	.	.	.	.	.	.	.	-
B41	-1	0	0	0	.	.	.	.	.	.	.	.	.	T	.	.	.	.	.	.	.	.	.	.	-	-	-	-	-	-	-	.	.	.	.	.	.	.	.	.	.	.	.	.	.	.	.	.	-
B42	-1	0	0	0	-	.	.	.	.	.	.	.	.	.	.	.	.	.	.	.	.	.	.	.	-	-	-	-	-	-	A	G	.	-	.	.	.	.	.	.	.	.	.	.	.	.	.	.	-
B43	-1	0	0	0	-	-	-	-	-	-	-	-	-	-	-	-	-	-	-	-	-	-	-	-	-	-	-	-	-	-	-	-	-	-	-	-	-	-	-	-	-	-	-	-	-	-	-	-	-
B44	-1	0	0	0	-	.	.	.	.	.	.	.	.	.	.	.	.	.	.	.	.	.	.	.	-	-	-	-	-	-	A	G	.	-	.	.	.	.	.	.	.	.	.	.	.	.	.	.	-
D48	-1	0	0	0	-	.	.	.	.	.	.	.	.	.	.	.	.	.	.	.	.	.	.	.	-	-	-	-	-	-	A	G	.	-	.	.	.	.	.	.	M	.	.	.	.	.	.	.	-
D49	-1	0	0	0	.	.	.	.	.	.	.	.	.	.	.	.	.	.	.	.	.	.	.	.	-	-	-	-	-	-	A	G	.	-	.	.	.	.	.	.	.	.	.	.	.	.	.	T	-
D50	-1	0	0	0	.	.	.	.	.	.	.	.	.	.	.	.	.	.	.	.	.	.	.	.	-	-	-	-	-	-	A	G	.	-	.	.	.	.	.	.	.	.	.	.	.	.	.	.	-
D51	-1	0	0	0	-	-	-	-	-	-	-	-	-	-	-	-	-	-	-	-	-	-	-	-	-	-	-	-	-	-	-	-	-	-	-	-	-	-	-	-	-	-	-	-	-	-	-	-	-
D52	-1	0	0	0	.	.	.	.	.	.	.	.	.	.	.	.	.	.	.	.	.	.	.	.	-	-	-	-	-	-	A	G	.	-	.	.	.	.	.	.	.	.	.	.	.	.	.	.	-
D53	-1	0	0	0	.	.	G	.	.	.	.	.	.	.	.	.	.	.	.	.	.	.	.	.	-	-	-	-	-	-	A	G	.	-	.	.	.	.	.	.	.	.	.	.	.	.	.	.	-
D54	-1	0	0	0	.	.	G	.	.	.	.	.	.	.	.	.	.	.	.	.	.	.	.	.	-	-	-	-	-	-	A	G	.	-	.	.	.	.	.	.	.	.	.	.	.	.	.	.	-
D55	-1	0	0	0	A	R	.	.	G	G	C	T	.	A	.	.	T	T	C	A	G	C	.	G	-	-	-	-	-	-	-	-	.	T	.	.	.	C	C	.	C	.	.	T	G	A	.	C	-
D56	-1	0	0	0	.	.	G	.	.	.	.	.	G	.	.	.	.	.	.	.	.	.	.	.	-	-	-	-	-	-	A	G	.	-	.	.	.	T	.	.	.	.	.	.	.	C	C	.	-
E57	-1	0	0	0	.	.	.	.	.	.	.	.	.	.	.	.	.	.	.	.	.	.	.	.	-	-	-	-	-	-	A	G	.	-	.	.	.	.	.	.	.	.	.	.	.	.	.	.	-
E58	-1	0	0	0	.	.	.	.	.	.	.	.	.	.	.	.	.	.	.	.	.	.	.	.	-	-	-	-	-	-	A	G	.	-	.	.	.	.	.	.	.	.	.	.	.	.	.	.	-
F59	-1	0	0	0	.	.	.	.	.	.	.	.	.	.	.	.	.	.	.	.	.	.	.	.	-	-	-	-	-	-	A	.	A	C	.	A	G	G	.	.	T	.	.	.	T	A	G	.	-
F60	-1	0	0	0	.	.	.	.	.	.	.	.	.	.	.	.	.	.	.	.	.	.	.	.	-	-	-	-	-	-	A	G	.	-	.	.	.	.	.	.	.	.	.	.	.	.	.	.	-
F61	-1	0	0	0	.	.	.	.	.	.	.	.	.	.	.	.	.	.	.	.	.	.	.	.	-	-	-	-	-	-	A	G	.	-	.	.	.	.	.	.	.	.	.	.	.	.	.	.	-
F62	-1	0	0	0	-	A	G	.	A	.	.	.	.	.	.	G	T	.	.	.	.	.	.	.	-	-	-	-	-	-	-	.	.	.	.	.	.	.	.	.	.	.	.	.	.	.	.	.	-
F63	-1	0	0	0	.	.	.	.	.	.	.	.	.	.	.	.	.	.	.	.	.	.	.	.	-	-	-	-	-	-	A	G	.	-	.	.	.	.	.	.	.	.	.	.	.	.	.	.	-
G64	-1	0	0	0	.	.	.	.	.	.	.	.	.	.	.	.	.	.	.	.	.	.	.	.	-	-	-	-	-	-	A	G	.	-	.	.	.	.	.	.	.	.	.	.	.	.	.	.	-
G65	-1	0	0	0	-	.	.	.	.	.	.	.	.	.	.	.	.	.	.	.	.	.	.	.	-	-	-	-	-	-	-	.	.	.	.	.	.	.	.	.	.	.	.	.	.	.	.	.	-
G66	-1	0	0	0	A	G	G	A	.	C	.	.	.	.	.	.	.	.	.	.	.	.	.	.	-	-	-	-	-	-	A	G	.	-	.	.	.	.	.	.	.	.	.	.	.	.	.	.	-
G67	-1	0	0	0	.	A	T	C	G	.	.	.	G	.	.	.	.	.	.	C	.	.	.	.	-	-	-	-	-	-	A	G	.	-	.	.	.	.	.	.	.	T	.	.	.	.	.	.	-
G68	-1	0	0	0	A	G	G	A	.	.	.	.	.	.	.	.	.	.	.	.	.	.	.	.	-	-	-	-	-	-	A	G	.	-	.	.	.	.	.	.	.	.	.	.	.	.	.	.	-
G69	-1	0	0	0	.	.	.	.	.	.	.	.	.	.	.	.	.	.	.	.	.	.	.	.	-	-	-	-	-	-	A	G	.	-	.	.	.	.	.	.	.	.	.	.	.	.	.	.	-
G70	-1	0	0	0	.	.	Y	.	.	.	.	.	.	.	.	R	.	.	.	.	.	.	.	.	-	-	-	-	-	-	A	G	.	-	.	.	.	.	.	.	.	.	Y	.	.	.	.	.	-
J74	-1	0	0	0	.	.	.	.	.	.	.	.	.	.	.	.	.	.	.	.	.	.	.	.	-	-	-	-	-	-	A	G	.	-	.	.	.	.	.	.	.	.	.	.	.	.	.	.	-
J76	-1	0	0	0	.	.	.	.	.	.	.	.	.	.	.	.	.	.	.	.	.	.	.	.	-	-	-	-	-	-	A	G	.	-	.	.	.	.	.	.	.	.	.	.	.	.	.	.	-
J77	-1	0	0	0	.	.	.	.	.	.	.	.	.	.	.	.	.	.	.	.	.	.	.	.	-	-	-	-	-	-	A	G	.	-	.	.	.	.	.	.	.	.	.	.	.	.	.	.	-
J78	-1	0	0	0	.	.	.	.	.	.	.	.	.	.	.	G	.	T	.	.	.	.	.	.	-	-	-	-	-	-	-	.	.	.	.	.	.	.	.	.	.	.	.	.	.	.	.	.	-
J79	-1	0	0	0	.	.	.	.	.	.	.	.	.	.	.	.	.	.	.	.	T	.	.	.	-	-	-	-	-	-	-	.	.	.	.	.	.	.	.	.	.	.	.	.	.	.	.	.	-
J80	-1	0	0	0	.	.	.	.	.	.	.	.	.	.	.	.	.	.	.	.	.	.	.	.	-	-	-	-	-	-	A	G	.	-	.	.	.	.	.	.	.	.	.	.	.	.	.	.	-
J81	-1	0	0	0	.	G	G	.	.	.	.	C	.	.	.	.	.	G	.	A	G	.	.	.	-	-	-	-	-	-	-	.	.	.	.	.	.	.	G	A	G	T	G	.	.	.	.	.	-
J82	-1	0	0	0	-	.	.	.	.	.	.	.	.	.	.	.	.	.	.	.	.	.	.	.	-	-	-	-	-	-	A	G	.	-	.	.	.	.	.	.	.	.	.	.	.	.	.	.	-
J83	-1	0	0	0	-	.	.	.	.	.	.	.	.	.	.	.	.	.	.	.	.	.	.	.	-	-	-	-	-	-	A	G	.	-	.	.	.	.	.	.	.	.	.	.	.	.	.	.	-
J84	-1	0	0	0	-	.	.	.	.	.	.	.	.	.	.	.	.	.	.	.	.	.	.	.	-	-	-	-	-	-	A	G	.	-	.	.	.	.	.	.	.	.	.	.	.	.	.	.	-
J85	-1	0	0	0	A	G	G	A	.	C	A	T	.	A	-	-	-	-	.	.	.	.	.	.	-	-	-	-	-	-	A	G	.	-	.	.	.	.	.	.	.	.	.	.	.	.	.	.	-
F86	-1	0	0	0	-	.	.	.	.	.	.	.	.	.	.	.	.	.	.	.	.	.	.	.	-	-	-	-	-	-	A	G	.	-	.	.	.	.	.	.	.	.	.	.	.	.	.	.	-
KU855474.1	-1	0	0	0	C	.	.	A	C	.	.	A	A	A	G	.	.	.	C	.	.	.	A	.	C	A	-	-	-	-	G	G	T	T	.	C	A	.	C	G	T	T	T	.	G	.	G	.	G
	1	1	1	1	1	1	1	1	1	1	1	1	1	1	1	1	1	1	1	1	1	1	1	1	1	1	1	1	1	1	1	1	1	1	1	1	1	1	1	1	1	1	1	2	2	2	2	2	2
	5	5	5	6	6	6	6	6	6	6	6	6	6	7	7	7	7	7	7	7	7	7	7	8	8	8	8	8	8	8	8	8	8	9	9	9	9	9	9	9	9	9	9	0	0	0	0	0	0
	7	8	9	0	1	2	3	4	5	6	7	8	9	0	1	2	3	4	5	6	7	8	9	0	1	2	3	4	5	6	7	8	9	0	1	2	3	4	5	6	7	8	9	0	1	2	3	4	5
Ab1	-1	0	0	0	-	-	-	S	T	Y	C	T	C	C	C	A	T	C	S	G	M	R	-	T	S	T	A	T	T	T	G	T	A	C	-	-	C	M	T	G	K	K	K	C	-	T	T	S	-
Ab2	-1	0	0	0	-	-	-	G	.	C	.	.	.	.	.	.	Y	.	C	.	T	G	-	.	Y	.	.	.	.	.	.	.	.	.	-	-	.	C	.	.	T	T	G	.	-	.	.	C	-
Ab3	-1	0	0	0	-	-	-	G	.	S	.	K	M	M	Y	.	Y	.	G	.	T	G	-	Y	C	.	.	.	.	.	.	.	.	.	-	-	.	C	.	.	.	T	G	S	-	.	.	M	-
Ab4	-1	0	0	0	-	-	-	-	-	-	-	-	Y	.	.	.	W	.	C	.	T	G	-	W	Y	.	-	Y	.	.	.	.	.	.	-	-	.	C	.	.	T	T	G	.	-	.	.	C	-
Ab6	-1	0	0	0	-	-	-	A	.	C	Y	.	A	T	.	.	C	.	T	.	G	T	G	K	M	W	M	W	K	K	.	G	G	.	T	T	.	C	C	.	T	T	G	G	-	-	.	T	-
Ab7	-1	0	0	0	-	-	-	G	.	C	.	.	M	.	.	M	.	M	C	.	T	Y	-	.	K	.	.	.	.	W	.	.	W	.	-	-	.	C	.	.	S	T	G	S	-	.	.	W	-
Ab8	-1	0	0	0	-	-	-	G	.	C	.	.	.	.	.	.	.	.	C	.	T	G	-	.	C	.	.	.	.	.	.	.	.	.	-	-	.	C	.	S	T	T	G	S	C	.	K	C	-
Ab9	-1	0	0	0	-	-	-	G	.	C	.	.	.	.	.	.	.	.	C	.	T	G	-	.	C	.	.	.	.	.	.	.	.	.	-	-	.	C	.	.	T	T	G	.	-	.	.	C	-
Ab10	-1	0	0	0	-	-	-	G	.	C	.	.	.	.	.	.	.	.	C	.	T	G	-	.	C	.	.	.	.	.	.	.	.	.	-	-	.	C	.	.	T	T	G	.	-	.	.	C	-
Ab11	-1	0	0	0	-	-	-	-	-	-	-	-	-	-	-	.	A	A	G	.	T	T	-	G	G	G	G	.	.	G	.	G	-	-	-	-	-	-	-	-	-	-	-	-	-	-	-	-	-
Ab12	-1	0	0	0	-	-	-	G	.	C	.	.	.	.	.	.	.	.	C	.	T	G	-	.	C	.	.	.	.	.	.	.	.	.	-	-	.	C	.	.	T	T	G	.	-	.	.	C	-
Ab13	-1	0	0	0	-	-	T	T	.	A	A	A	A	A	A	.	C	A	G	.	T	T	-	.	.	G	G	.	C	A	A	G	.	.	C	C	Y	C	A	.	C	A	G	.	G	.	.	T	T
Ab14	-1	0	0	0	-	-	-	-	-	-	.	.	.	T	A	C	A	A	C	.	T	G	-	.	T	.	G	.	.	.	.	.	G	R	A	-	.	.	.	S	C	.	.	G	G	S	.	A	T
G16	-1	0	0	0	T	C	C	G	.	C	.	.	.	.	.	.	.	.	C	.	A	G	-	.	C	.	.	.	.	.	.	.	.	.	-	-	.	C	.	.	T	T	G	.	-	.	.	C	-
G17	-1	0	0	0	-	-	-	G	.	C	.	.	.	.	Y	.	.	Y	.	.	W	S	-	Y	C	.	R	.	.	.	.	.	K	.	-	-	.	C	.	K	T	T	G	S	-	.	.	C	-
Ab19	-1	0	0	0	-	-	-	G	.	C	.	.	.	.	.	.	.	.	C	.	T	G	-	.	C	.	.	.	.	.	.	.	.	.	-	-	.	C	.	.	T	T	G	.	-	.	.	C	-
Ab20	-1	0	0	0	-	-	-	G	.	C	.	.	.	.	.	.	.	.	C	.	T	G	-	.	C	.	.	.	.	.	.	.	.	.	-	-	.	C	.	.	T	T	G	.	-	.	.	M	-
Ab21	-1	0	0	0	-	-	-	G	.	C	.	.	.	.	.	.	.	.	C	.	T	G	-	.	T	.	.	.	.	Y	.	.	.	S	-	-	M	.	Y	R	T	W	S	.	-	.	W	M	-
B22	-1	0	0	0	-	-	-	.	.	C	.	Y	.	.	.	.	.	S	Y	.	T	G	-	.	M	.	W	.	.	.	.	.	M	.	-	-	.	S	.	.	T	T	G	Y	-	.	.	Y	-
B24	-1	0	0	0	-	-	-	G	.	C	.	.	.	.	.	.	.	.	C	.	T	G	-	.	C	.	.	.	.	.	.	.	.	.	-	-	.	C	.	.	T	T	G	.	-	.	.	C	-
B25	-1	0	0	0	-	-	-	G	.	C	.	.	.	.	.	.	.	.	C	.	T	G	-	.	C	.	.	.	.	.	.	.	.	.	-	-	.	C	.	.	T	T	G	Y	-	.	.	C	-
B26	-1	0	0	0	-	-	-	G	.	C	.	.	.	.	.	.	.	.	C	.	T	G	-	.	C	.	.	.	.	.	.	.	.	.	-	-	.	C	.	.	T	T	G	.	-	.	.	C	-
B27	-1	0	0	0	-	-	-	G	.	C	.	.	.	.	.	.	.	.	C	.	T	G	-	.	C	.	.	.	.	.	.	.	.	.	-	-	.	C	.	.	T	T	G	.	-	.	.	C	-
B28	-1	0	0	0	-	-	-	G	.	C	.	.	.	.	.	.	.	.	C	.	T	G	-	.	C	.	.	.	.	.	.	.	.	.	-	-	.	C	.	.	T	T	G	.	-	.	.	C	-
B29	-1	0	0	0	C	C	T	.	Y	.	A	.	T	.	G	G	C	S	G	.	T	G	-	.	C	.	.	.	Y	C	A	.	.	.	-	-	.	C	.	.	T	T	G	M	-	.	.	C	-
B30	-1	0	0	0	-	-	-	.	.	C	.	Y	.	.	.	M	Y	.	C	.	T	G	-	.	.	.	.	.	.	.	.	.	R	.	-	-	.	C	Y	.	T	.	.	Y	-	.	.	Y	-
B32	-1	0	0	0	-	-	-	G	.	C	.	.	.	.	.	.	.	.	C	.	T	G	-	.	C	.	.	.	.	.	.	.	.	.	-	-	.	C	.	.	T	T	G	.	-	.	.	C	-
B33	-1	0	0	0	-	-	-	G	.	C	.	.	.	.	.	.	.	.	C	.	T	G	-	.	C	.	.	.	.	.	.	.	.	.	-	-	.	C	.	.	T	T	G	.	-	.	.	C	G
B34	-1	0	0	0	W	T	C	G	.	C	.	.	.	.	Y	.	.	.	C	K	.	S	C	.	Y	.	R	.	.	K	K	.	T	.	-	-	.	C	K	.	.	T	S	.	T	.	Y	.	-
B35	-1	0	0	0	T	C	C	G	K	C	S	.	.	.	.	W	.	.	C	S	T	G	-	.	C	G	W	.	.	.	.	.	Y	.	-	-	.	C	.	S	.	T	.	S	T	.	Y	Y	-
B36	-1	0	0	0	-	-	-	.	Y	C	S	.	.	.	.	.	.	.	C	.	W	G	-	Y	C	.	.	.	.	.	.	.	.	.	-	-	.	Y	.	.	T	T	G	M	-	.	.	C	-
B37	-1	0	0	0	-	-	-	G	.	C	.	.	.	.	.	.	.	.	C	.	T	G	-	.	C	.	.	.	.	.	.	.	.	.	-	-	.	C	.	.	T	T	G	.	-	.	.	C	-
B38	-1	0	0	0	-	-	S	G	.	C	.	.	.	.	Y	M	Y	.	C	.	W	G	-	.	Y	.	W	.	.	K	K	.	T	.	-	-	.	C	.	.	.	T	.	Y	-	.	.	Y	-
B39	-1	0	0	0	-	-	-	-	-	-	-	-	M	.	.	W	.	.	C	K	T	G	-	.	M	.	-	C	.	.	.	.	.	Y	-	-	Y	Y	.	.	C	S	G	S	-	W	W	C	-
B41	-1	0	0	0	-	-	-	G	Y	C	.	.	.	.	.	.	.	.	C	.	K	G	-	.	Y	.	.	.	.	.	.	.	.	.	-	-	.	Y	.	.	T	T	G	S	-	.	.	.	-
B42	-1	0	0	0	-	-	-	G	.	C	.	.	.	.	.	.	.	.	C	.	T	G	-	.	C	.	.	.	.	.	.	.	.	.	-	-	.	C	.	.	T	T	G	.	-	.	.	C	-
B43	-1	0	0	0	-	-	-	-	-	-	-	.	.	.	.	.	.	.	C	.	T	G	-	C	C	.	.	.	.	C	-	.	.	G	-	-	.	C	.	.	T	T	G	.	-	.	.	C	-
B44	-1	0	0	0	-	-	-	G	.	C	.	.	.	.	.	.	.	.	C	.	T	G	-	.	C	.	.	.	.	.	.	.	.	.	-	-	.	C	.	.	T	T	G	.	-	.	.	C	-
D48	-1	0	0	0	-	-	-	G	.	C	.	.	.	.	.	.	.	.	C	.	T	G	-	.	C	.	.	.	.	.	.	.	.	.	-	-	.	C	.	.	T	T	G	.	-	.	.	C	-
D49	-1	0	0	0	-	-	-	-	-	-	-	.	.	.	.	.	.	.	C	.	T	G	-	.	C	.	.	.	.	C	A	.	.	.	-	-	.	C	.	.	T	T	R	S	-	.	.	C	-
D50	-1	0	0	0	-	-	-	-	-	-	-	.	.	.	.	.	.	.	C	.	T	G	-	.	C	.	.	.	.	C	A	.	.	.	-	-	.	C	.	.	T	T	G	.	-	.	.	C	-
D51	-1	0	0	0	-	-	-	-	-	-	-	-	.	.	.	.	.	.	C	.	T	G	-	.	C	.	-	C	.	.	.	.	C	.	-	-	.	-	.	.	T	T	G	G	-	.	.	C	-
D52	-1	0	0	0	-	-	-	-	-	-	-	.	.	.	.	.	.	.	C	.	T	G	-	.	C	.	.	.	.	C	A	.	.	.	-	-	.	C	.	.	T	T	G	.	-	.	.	C	-
D53	-1	0	0	0	-	-	-	G	.	C	.	.	.	.	.	.	.	.	C	.	T	G	-	.	C	.	.	.	.	.	.	.	W	.	-	-	.	C	.	.	T	T	G	S	-	.	.	C	-
D54	-1	0	0	0	-	-	-	G	.	C	.	.	.	.	.	.	.	.	C	.	T	G	-	.	C	.	.	.	.	.	.	.	W	.	-	-	.	C	.	.	T	T	G	S	-	.	.	C	-
D55	-1	0	0	0	-	-	-	-	-	-	-	-	-	-	-	.	A	A	G	.	T	T	-	G	G	G	G	.	.	G	.	G	-	-	-	-	-	-	-	-	-	-	-	-	-	-	-	-	-
D56	-1	0	0	0	-	-	-	-	-	-	-	-	.	.	.	.	.	.	.	.	T	G	-	.	Y	.	-	Y	.	.	.	.	M	.	-	-	.	C	.	.	T	T	.	K	-	.	.	C	-
E57	-1	0	0	0	-	-	-	-	-	-	-	.	.	.	.	.	.	.	C	.	T	G	-	.	C	.	.	.	.	C	A	.	.	.	-	-	.	C	.	.	T	T	G	.	-	.	.	C	-
E58	-1	0	0	0	-	-	-	-	-	-	-	.	.	.	.	.	.	.	C	.	T	G	-	.	C	.	.	.	.	C	A	.	.	.	-	-	.	C	.	.	T	T	G	.	-	.	.	C	-
F59	-1	0	0	0	-	-	-	-	-	-	-	G	T	G	A	.	C	.	T	.	C	G	-	G	A	A	.	W	.	C	A	.	.	.	-	-	.	C	.	.	T	T	G	T	-	.	.	C	-
F60	-1	0	0	0	-	-	-	-	-	-	-	-	.	.	.	.	.	.	C	.	T	G	-	.	C	.	.	.	C	.	.	.	.	.	-	-	.	C	K	.	T	.	G	Y	-	.	.	C	-
F61	-1	0	0	0	-	-	-	-	-	-	-	-	.	.	.	.	.	.	C	.	T	G	-	.	C	.	-	C	.	.	.	.	.	.	-	-	.	C	.	.	T	T	G	.	-	.	.	C	-
F62	-1	0	0	0	-	-	-	-	-	C	.	.	.	.	.	.	.	.	C	.	T	G	-	.	C	.	.	.	.	C	A	.	.	.	-	-	.	C	.	.	T	T	G	.	-	.	.	Y	-
F63	-1	0	0	0	T	C	C	A	A	C	.	.	.	.	.	.	.	.	C	.	T	G	-	.	C	.	.	.	.	C	A	.	.	.	-	-	.	C	.	.	T	T	G	.	-	.	.	C	-
G64	-1	0	0	0	-	-	-	-	-	-	-	.	.	.	.	.	.	.	C	.	T	G	-	.	C	.	.	.	.	C	A	.	.	.	-	-	.	C	.	.	T	T	G	.	-	.	.	C	-
G65	-1	0	0	0	-	-	-	G	.	C	.	.	.	.	.	.	.	.	C	.	T	G	-	.	C	.	.	.	.	.	.	.	.	.	-	-	.	C	.	.	T	T	G	.	-	.	.	C	-
G66	-1	0	0	0	-	-	-	G	.	C	.	.	.	.	.	.	.	.	C	.	T	G	-	.	C	.	.	.	.	.	.	.	.	.	-	-	.	C	.	.	T	T	G	.	-	.	.	C	-
G67	-1	0	0	0	-	-	-	-	-	-	-	-	.	.	.	M	.	.	.	.	T	G	-	.	Y	.	-	Y	.	.	.	.	.	.	-	-	.	C	.	.	T	T	G	Y	-	.	.	C	-
G68	-1	0	0	0	-	-	-	-	-	-	-	.	.	.	.	.	.	.	C	.	T	G	-	.	C	.	.	.	.	C	A	.	.	.	-	-	.	C	.	.	T	T	G	.	-	.	.	C	-
G69	-1	0	0	0	-	-	-	G	.	C	.	.	.	.	.	.	.	.	C	.	T	G	-	.	C	.	.	.	.	.	.	.	.	.	-	-	.	C	.	.	T	T	G	.	-	.	.	C	-
G70	-1	0	0	0	-	-	-	-	-	-	-	.	.	.	.	.	.	.	C	.	T	G	-	Y	C	.	.	.	.	C	A	.	.	.	-	-	.	C	.	.	T	T	G	.	-	.	.	C	-
J74	-1	0	0	0	-	-	-	-	-	-	-	-	.	.	.	.	.	.	C	.	T	G	-	.	C	.	-	C	.	.	.	.	.	.	-	-	.	C	.	.	T	T	G	.	-	.	.	C	-
J76	-1	0	0	0	-	-	-	-	-	-	-	.	.	.	.	.	.	.	C	.	T	G	-	.	C	.	.	.	.	C	A	.	.	.	-	-	.	C	.	.	T	T	G	.	-	.	.	C	-
J77	-1	0	0	0	-	-	-	-	-	-	-	.	.	.	.	.	.	.	C	.	T	G	-	.	C	.	.	.	.	C	A	.	.	.	-	-	.	C	.	.	T	T	G	.	-	.	.	C	-
J78	-1	0	0	0	-	-	-	G	.	C	.	.	.	.	.	.	.	.	C	.	T	G	-	.	Y	.	.	.	.	.	.	.	W	.	-	-	.	C	.	.	T	T	G	Y	-	.	.	.	-
J79	-1	0	0	0	-	-	-	G	.	C	.	.	.	.	.	.	.	.	C	.	T	G	-	.	T	.	.	.	.	.	.	.	.	.	-	-	.	C	.	.	T	T	G	Y	-	.	.	Y	-
J80	-1	0	0	0	-	-	-	-	-	-	-	-	.	.	.	.	.	.	C	.	T	G	-	.	C	.	-	C	.	Y	S	.	.	.	-	-	.	C	.	.	T	T	G	.	-	.	.	C	-
J81	-1	0	0	0	-	-	-	G	.	C	.	.	.	.	.	M	.	Y	C	.	T	G	-	.	W	.	.	.	.	Y	.	.	G	.	-	-	.	C	.	.	T	T	G	S	-	.	.	.	-
J82	-1	0	0	0	-	-	-	G	.	C	.	.	.	.	.	.	.	.	C	.	T	G	-	.	C	.	.	.	.	.	.	.	.	.	-	-	.	C	.	.	T	T	G	.	-	.	.	C	-
J83	-1	0	0	0	-	-	-	G	.	C	.	.	.	.	.	.	.	.	C	.	T	G	-	.	C	.	.	.	.	.	.	.	.	.	-	-	.	C	.	.	T	T	G	.	-	.	.	C	-
J84	-1	0	0	0	-	-	-	G	.	C	.	.	.	.	.	.	.	.	C	.	T	G	-	.	C	.	.	.	.	.	.	.	.	.	-	-	.	C	.	.	T	T	G	.	-	.	.	C	-
J85	-1	0	0	0	-	-	-	G	.	C	.	.	.	.	.	.	.	.	C	.	T	G	-	.	C	.	.	.	.	.	.	.	.	.	-	-	.	C	.	.	T	T	G	.	-	.	.	C	-
F86	-1	0	0	0	-	-	-	G	.	C	.	.	.	.	.	.	.	.	C	.	T	G	-	.	C	.	.	.	.	.	.	.	.	.	-	-	.	C	.	.	T	T	G	.	-	.	.	C	-
KU855474.1	-1	0	0	0	-	-	-	-	-	-	.	C	.	.	A	C	G	Y	C	.	A	G	A	G	C	G	C	G	.	G	.	.	T	T	T	G	.	C	C	C	G	C	G	T	C	C	.	C	-
	2	2	2	2	2	2	2	2	2	2	2	2	2	2	2	2	2	2	2	2	2	2	2	2	2	2	2	2	2	2	2	2	2	2	2	2	2	2	2	2	2	2	2	2	2	2	2	2	2
	3	3	3	3	3	4	4	4	4	4	4	4	4	4	4	5	5	5	5	5	5	5	5	5	5	6	6	6	6	6	6	6	6	6	6	7	7	7	7	7	7	7	7	7	7	8	8	8	8
	5	6	7	8	9	0	1	2	3	4	5	6	7	8	9	0	1	2	3	4	5	6	7	8	9	0	1	2	3	4	5	6	7	8	9	0	1	2	3	4	5	6	7	8	9	0	1	2	3
Ab1	-1	0	0	0	-	-	-	-	-	-	-	-	-	-	-	-	-	-	-	-	G	K	C	G	G	S	-	-	-	-	C	Y	C	S	M	C	-	-	-	-	-	-	-	-	-	-	-	-	-
Ab2	-1	0	0	0	-	-	-	-	-	-	-	-	-	-	-	-	-	-	-	-	R	G	.	.	.	G	-	-	-	-	.	C	.	G	C	.	-	-	-	-	-	-	-	-	-	-	-	-	-
Ab3	-1	0	0	0	-	-	-	-	-	-	-	-	-	-	-	-	-	-	-	-	S	G	Y	K	R	G	-	-	-	-	.	C	.	R	C	.	-	-	-	-	-	-	-	-	-	-	-	-	-
Ab4	-1	0	0	0	-	-	-	-	-	-	-	-	-	-	-	-	-	-	-	-	.	G	.	.	.	G	-	-	-	-	.	C	.	K	C	.	-	-	-	-	-	-	-	-	-	-	-	-	-
Ab6	-1	0	0	0	-	-	-	-	-	-	-	-	-	-	-	-	-	-	-	-	.	S	.	C	S	T	-	-	-	-	.	T	.	G	G	.	G	G	-	-	-	-	-	-	-	-	-	-	-
Ab7	-1	0	0	0	-	-	-	-	-	-	-	-	-	-	-	-	-	-	-	-	.	.	G	.	.	G	-	-	-	-	.	C	S	C	C	.	-	-	-	-	-	-	-	-	-	-	-	-	-
Ab8	-1	0	0	0	-	-	-	-	-	-	-	-	-	-	-	-	-	-	-	-	.	G	S	.	.	G	W	K	T	T	.	C	Y	K	C	.	-	-	-	-	-	-	-	-	-	-	-	-	-
Ab9	-1	0	0	0	-	-	-	-	-	-	-	-	-	-	-	-	-	-	-	-	.	G	.	.	.	G	-	-	-	-	.	C	.	G	C	.	-	-	-	-	-	-	-	-	-	-	-	-	-
Ab10	-1	0	0	0	-	-	-	-	-	-	-	-	-	-	-	-	-	-	-	-	.	G	.	.	.	G	-	-	-	-	.	C	.	G	C	.	-	-	-	-	-	-	-	-	-	-	-	-	-
Ab11	-1	0	0	0	A	C	C	T	A	C	A	G	G	A	G	C	G	G	G	T	.	A	.	A	A	A	A	A	A	A	G	T	T	G	C	T	T	C	C	C	A	T	A	C	-	-	-	-	-
Ab12	-1	0	0	0	-	-	-	-	-	-	-	-	-	-	-	-	-	-	-	-	.	G	.	.	.	G	-	-	-	-	.	C	.	G	C	.	-	-	-	-	-	-	-	-	-	-	-	-	-
Ab13	-1	0	0	0	A	C	C	C	T	C	M	G	C	A	G	C	G	G	G	T	.	R	S	R	W	R	A	M	G	T	G	A	-	G	C	T	T	C	C	Y	A	T	A	C	A	-	-	-	-
Ab14	-1	0	0	0	-	-	-	-	-	-	-	-	-	-	-	-	-	-	-	-	T	C	Y	.	W	K	G	Y	T	T	.	S	G	G	S	.	-	-	-	-	-	-	-	-	-	-	-	-	-
G16	-1	0	0	0	-	-	-	-	-	-	-	-	-	-	-	-	-	-	-	-	.	G	.	.	.	G	-	-	-	-	S	C	.	G	.	.	-	-	-	-	-	-	-	-	-	-	-	-	-
G17	-1	0	0	0	-	-	-	-	-	-	-	-	-	-	-	-	-	-	-	-	S	G	K	.	.	G	-	-	-	-	S	C	.	C	C	.	-	-	-	-	-	-	-	-	-	-	-	-	-
Ab19	-1	0	0	0	-	-	-	-	-	-	-	-	-	-	-	-	-	-	-	-	.	G	.	.	.	G	-	-	-	-	.	C	.	G	C	.	-	-	-	-	-	-	-	-	-	-	-	-	-
Ab20	-1	0	0	0	-	-	-	-	-	-	-	-	-	-	-	-	-	-	-	-	.	G	.	.	.	G	-	-	-	-	.	C	.	G	C	.	-	-	-	-	-	-	-	-	-	-	-	-	-
Ab21	-1	0	0	0	-	-	-	-	-	-	-	-	-	-	-	-	-	-	-	-	R	R	.	.	K	K	-	-	-	-	S	S	Y	G	C	.	-	-	-	-	-	-	-	-	-	-	-	-	-
B22	-1	0	0	0	-	-	-	-	-	-	-	-	-	-	-	-	-	-	-	-	.	G	S	.	.	G	-	-	-	-	.	C	.	.	C	.	-	-	-	-	-	-	-	-	-	-	-	-	-
B24	-1	0	0	0	-	-	-	-	-	-	-	-	-	-	-	-	-	-	-	-	.	G	.	.	.	G	-	-	-	-	.	C	.	G	C	.	-	-	-	-	-	-	-	-	-	-	-	-	-
B25	-1	0	0	0	-	-	-	-	-	-	-	-	-	-	-	-	-	-	-	-	.	G	.	.	.	G	-	-	-	-	.	C	.	.	C	.	-	-	-	-	-	-	-	-	-	-	-	-	-
B26	-1	0	0	0	-	-	-	-	-	-	-	-	-	-	-	-	-	-	-	-	.	G	.	.	.	G	-	-	-	-	S	C	.	G	C	.	-	-	-	-	-	-	-	-	-	-	-	-	-
B27	-1	0	0	0	-	-	-	-	-	-	-	-	-	-	-	-	-	-	-	-	.	G	.	.	.	G	-	-	-	-	.	C	.	G	C	.	-	-	-	-	-	-	-	-	-	-	-	-	-
B28	-1	0	0	0	-	-	-	-	-	-	-	-	-	-	-	-	-	-	-	-	.	G	.	.	.	G	-	-	-	-	.	C	.	G	C	.	-	-	-	-	-	-	-	-	-	-	-	-	-
B29	-1	0	0	0	-	-	-	-	-	-	-	-	-	-	-	-	-	-	-	-	.	G	.	.	.	G	-	-	-	-	.	C	.	G	C	.	G	G	C	T	G	C	C	C	C	T	C	C	T
B30	-1	0	0	0	-	-	-	-	-	-	-	-	-	-	-	-	-	-	-	-	.	G	S	.	.	G	-	-	-	-	.	C	.	.	C	.	-	-	-	-	-	-	-	-	-	-	-	-	-
B32	-1	0	0	0	-	-	-	-	-	-	-	-	-	-	-	-	-	-	-	-	.	G	.	.	.	G	-	-	-	-	.	C	.	G	C	.	-	-	-	-	-	-	-	-	-	-	-	-	-
B33	-1	0	0	0	T	G	T	A	C	C	C	T	G	T	T	G	C	T	T	C	.	G	.	.	.	G	-	-	-	-	.	C	.	G	C	.	-	-	-	-	-	-	-	-	-	-	-	-	-
B34	-1	0	0	0	-	-	-	-	-	-	-	-	-	-	-	-	-	-	-	-	-	G	Y	.	.	G	-	-	-	-	G	C	.	G	C	.	-	-	-	-	-	-	-	-	-	-	-	-	-
B35	-1	0	0	0	-	-	-	-	-	-	-	-	-	-	-	-	-	-	-	-	-	.	T	.	.	G	-	-	-	-	.	C	.	G	C	.	-	-	-	-	-	-	-	-	-	-	-	-	-
B36	-1	0	0	0	-	-	-	-	-	-	-	-	-	-	-	-	-	-	-	-	.	G	S	.	.	.	-	-	-	-	.	C	.	G	C	.	-	-	-	-	-	-	-	-	-	-	-	-	-
B37	-1	0	0	0	-	-	-	-	-	-	-	-	-	-	-	-	-	-	-	-	.	G	.	.	.	G	-	-	-	-	.	C	.	G	C	.	-	-	-	-	-	-	-	-	-	-	-	-	-
B38	-1	0	0	0	-	-	-	-	-	-	-	-	-	-	-	-	-	-	-	-	S	G	K	.	.	G	-	-	-	-	S	C	.	.	C	.	-	-	-	-	-	-	-	-	-	-	-	-	-
B39	-1	0	0	0	-	-	-	-	-	-	-	-	-	-	-	-	-	-	-	-	.	G	.	.	.	.	-	-	-	-	.	C	.	R	C	M	-	-	-	-	-	-	-	-	-	-	-	-	-
B41	-1	0	0	0	-	-	-	-	-	-	-	-	-	-	-	-	-	-	-	-	.	G	.	.	.	G	-	-	-	-	.	C	.	G	C	.	-	-	-	-	-	-	-	-	-	-	-	-	-
B42	-1	0	0	0	-	-	-	-	-	-	-	-	-	-	-	-	-	-	-	-	.	G	.	.	.	G	-	-	-	-	.	C	.	G	C	.	-	-	-	-	-	-	-	-	-	-	-	-	-
B43	-1	0	0	0	-	-	-	-	-	-	-	-	-	-	-	-	-	-	-	-	C	G	G	.	.	G	-	-	-	-	.	T	.	C	C	.	G	G	G	T	G	C	C	C	C	T	Y	C	T
B44	-1	0	0	0	-	-	-	-	-	-	-	-	-	-	-	-	-	-	-	-	.	G	.	.	.	G	-	-	-	-	.	C	.	G	C	.	-	-	-	-	-	-	-	-	-	-	-	-	-
D48	-1	0	0	0	-	-	-	-	-	-	-	-	-	-	-	-	-	-	-	-	.	G	.	.	.	G	-	-	-	-	.	C	.	G	C	.	-	-	-	-	-	-	-	-	-	-	-	-	-
D49	-1	0	0	0	-	-	-	-	-	-	-	-	-	-	-	-	-	-	-	-	.	G	.	.	.	G	-	-	-	-	.	C	.	G	C	.	G	G	C	T	G	C	C	C	C	T	C	C	T
D50	-1	0	0	0	-	-	-	-	-	-	-	-	-	-	-	-	-	-	-	-	.	G	.	.	.	G	-	-	-	-	.	C	.	G	C	.	G	G	C	T	G	C	C	C	C	T	C	C	T
D51	-1	0	0	0	-	-	-	-	-	-	-	-	-	-	-	-	-	-	-	-	.	G	.	.	.	G	-	-	-	-	G	C	.	G	C	.	-	-	-	-	-	-	-	-	-	-	-	-	-
D52	-1	0	0	0	-	-	-	-	-	-	-	-	-	-	-	-	-	-	-	-	.	G	.	.	.	G	-	-	-	-	.	C	.	G	C	.	G	G	C	T	G	C	C	C	C	T	C	C	T
D53	-1	0	0	0	-	-	-	-	-	-	-	-	-	-	-	-	-	-	-	-	.	G	.	.	.	G	-	-	-	-	.	C	.	G	C	.	-	-	-	-	-	-	-	-	-	-	-	-	-
D54	-1	0	0	0	-	-	-	-	-	-	-	-	-	-	-	-	-	-	-	-	.	G	.	.	.	G	-	-	-	-	.	C	.	G	C	.	-	-	-	-	-	-	-	-	-	-	-	-	-
D55	-1	0	0	0	A	C	C	T	A	C	A	G	G	A	G	C	G	G	G	T	.	A	.	A	A	A	A	A	-	-	G	T	T	G	C	T	T	C	C	C	A	T	A	C	-	-	-	-	-
D56	-1	0	0	0	-	-	-	-	-	-	-	-	-	-	-	-	-	-	-	-	.	G	T	.	.	G	-	-	-	-	G	C	Y	Y	C	.	-	-	-	-	-	-	-	-	-	-	-	-	-
E57	-1	0	0	0	-	-	-	-	-	-	-	-	-	-	-	-	-	-	-	-	.	G	.	.	.	G	-	-	-	-	.	C	.	G	C	.	G	G	C	T	G	C	C	C	C	T	C	C	T
E58	-1	0	0	0	-	-	-	-	-	-	-	-	-	-	-	-	-	-	-	-	.	G	.	.	.	G	-	-	-	-	.	C	.	G	C	.	G	G	C	T	G	C	C	C	C	T	C	C	T
F59	-1	0	0	0	-	-	-	-	-	-	-	-	-	-	-	-	-	-	-	-	.	G	S	.	.	G	-	-	-	-	.	C	.	.	C	.	G	G	S	T	G	C	C	C	C	Y	C	C	T
F60	-1	0	0	0	-	-	-	-	-	-	-	-	-	-	-	-	-	-	-	-	.	G	S	.	T	G	-	-	-	-	S	C	.	A	C	G	-	-	-	-	-	-	-	-	-	-	-	-	-
F61	-1	0	0	0	-	-	-	-	-	-	-	-	-	-	-	-	-	-	-	-	.	G	.	.	.	G	-	-	-	-	.	C	.	G	C	.	-	-	-	-	-	-	-	-	-	-	-	-	-
F62	-1	0	0	0	-	-	-	-	-	-	-	-	-	-	-	-	-	-	-	-	.	G	.	.	.	G	-	-	-	-	.	C	.	G	C	.	G	G	C	T	G	C	C	C	C	T	C	C	-
F63	-1	0	0	0	-	-	-	-	-	-	-	-	-	-	-	-	-	-	-	-	.	G	.	.	.	G	-	-	-	-	.	C	.	G	C	.	G	G	C	T	G	C	C	C	C	T	C	C	T
G64	-1	0	0	0	-	-	-	-	-	-	-	-	-	-	-	-	-	-	-	-	.	G	.	.	.	G	-	-	-	-	.	C	.	G	C	.	G	G	C	T	G	C	C	C	C	T	C	C	T
G65	-1	0	0	0	-	-	-	-	-	-	-	-	-	-	-	-	-	-	-	-	.	G	.	.	.	G	-	-	-	-	.	C	.	G	C	.	-	-	-	-	-	-	-	-	-	-	-	-	-
G66	-1	0	0	0	-	-	-	-	-	-	-	-	-	-	-	-	-	-	-	-	.	G	.	.	.	G	-	-	-	-	.	C	.	G	C	.	-	-	-	-	-	-	-	-	-	-	-	-	-
G67	-1	0	0	0	-	-	-	-	-	-	-	-	-	-	-	-	-	-	-	-	.	G	S	.	.	G	-	-	-	-	S	C	.	Y	S	.	-	-	-	-	-	-	-	-	-	-	-	-	-
G68	-1	0	0	0	-	-	-	-	-	-	-	-	-	-	-	-	-	-	-	-	.	G	S	.	.	G	-	-	-	-	.	C	.	G	C	.	G	G	C	T	G	C	C	C	C	T	C	C	T
G69	-1	0	0	0	-	-	-	-	-	-	-	-	-	-	-	-	-	-	-	-	.	G	.	.	.	G	-	-	-	-	.	C	.	G	C	.	-	-	-	-	-	-	-	-	-	-	-	-	-
G70	-1	0	0	0	-	-	-	-	-	-	-	-	-	-	-	-	-	-	-	-	S	G	S	.	.	G	-	-	-	-	.	.	Y	.	C	.	G	G	S	T	G	C	C	C	C	T	C	C	T
J74	-1	0	0	0	-	-	-	-	-	-	-	-	-	-	-	-	-	-	-	-	.	G	Y	.	.	G	-	-	-	-	S	C	.	G	C	.	-	-	-	-	-	-	-	-	-	-	-	-	-
J76	-1	0	0	0	-	-	-	-	-	-	-	-	-	-	-	-	-	-	-	-	.	G	.	.	.	G	-	-	-	-	.	C	.	G	C	.	G	G	C	T	G	C	C	C	C	T	C	C	T
J77	-1	0	0	0	-	-	-	-	-	-	-	-	-	-	-	-	-	-	-	-	.	G	.	.	.	G	-	-	-	-	.	C	.	G	C	.	G	G	C	T	G	C	C	C	C	T	C	C	T
J78	-1	0	0	0	-	-	-	-	-	-	-	-	-	-	-	-	-	-	-	-	R	G	S	.	.	.	-	-	-	-	M	C	.	W	C	.	-	-	-	-	-	-	-	-	-	-	-	-	-
J79	-1	0	0	0	-	-	-	-	-	-	-	-	-	-	-	-	-	-	-	-	.	G	.	.	.	G	-	-	-	-	.	C	.	G	C	.	-	-	-	-	-	-	-	-	-	-	-	-	-
J80	-1	0	0	0	-	-	-	-	-	-	-	-	-	-	-	-	-	-	-	-	.	G	.	.	.	G	-	-	-	-	.	C	.	G	C	.	-	-	-	-	-	-	-	-	-	-	-	-	-
J81	-1	0	0	0	-	-	-	-	-	-	-	-	-	-	-	-	-	-	-	-	.	G	.	.	.	G	-	-	-	-	.	C	.	K	C	.	-	-	-	-	-	-	-	-	-	-	-	-	-
J82	-1	0	0	0	-	-	-	-	-	-	-	-	-	-	-	-	-	-	-	-	.	G	.	.	.	G	-	-	-	-	.	C	.	G	C	.	-	-	-	-	-	-	-	-	-	-	-	-	-
J83	-1	0	0	0	-	-	-	-	-	-	-	-	-	-	-	-	-	-	-	-	.	G	.	.	.	G	-	-	-	-	.	C	.	G	C	.	-	-	-	-	-	-	-	-	-	-	-	-	-
J84	-1	0	0	0	-	-	-	-	-	-	-	-	-	-	-	-	-	-	-	-	.	G	.	.	.	G	-	-	-	-	.	C	.	G	C	.	-	-	-	-	-	-	-	-	-	-	-	-	-
J85	-1	0	0	0	-	-	-	-	-	-	-	-	-	-	-	-	-	-	-	-	.	G	.	.	.	G	-	-	-	-	.	C	.	G	C	.	-	-	-	-	-	-	-	-	-	-	-	-	-
F86	-1	0	0	0	-	-	-	-	-	-	-	-	-	-	-	-	-	-	-	-	.	G	.	.	.	G	-	-	-	-	.	C	.	G	C	.	-	-	-	-	-	-	-	-	-	-	-	-	-
KU855474.1	-1	0	0	0	-	-	-	-	-	-	-	-	-	-	-	-	-	-	-	-	.	G	.	C	A	A	M	A	A	-	.	C	A	A	C	.	-	-	-	-	-	-	-	-	-	-	-	-	-
	3	3	3	3	3	3	3	3	3	3	3	3	3	3	3	3	3	3	3	3	3	3	3	3	3	3	3	3	3	3	3	3	3	3	3	3	3	3	3	3	3	3	3	3	3	3	3	3	3
	1	1	1	1	1	1	1	2	2	2	2	2	2	2	2	2	2	3	3	3	3	3	3	3	3	3	3	4	4	4	4	4	4	4	4	4	4	5	5	5	5	5	5	5	5	5	5	6	6
	3	4	5	6	7	8	9	0	1	2	3	4	5	6	7	8	9	0	1	2	3	4	5	6	7	8	9	0	1	2	3	4	5	6	7	8	9	0	1	2	3	4	5	6	7	8	9	0	1
Ab1	-1	0	0	0	-	-	C	C	C	C	C	G	G	-	-	G	M	C	C	-	-	G	T	G	Y	C	C	R	-	Y	-	-	-	-	-	-	M	R	R	A	K	A	C	-	-	-	-	-	M
Ab2	-1	0	0	0	-	-	.	.	.	.	.	.	.	-	-	.	C	.	.	-	-	.	.	.	C	.	.	G	-	C	-	-	-	-	-	-	C	G	G	.	G	.	.	-	-	-	-	-	C
Ab3	-1	0	0	0	-	-	.	.	.	M	.	.	.	-	-	.	C	.	.	-	-	S	.	S	C	.	.	G	-	M	-	-	-	-	-	-	C	S	G	M	G	.	.	-	-	-	-	-	C
Ab4	-1	0	0	0	-	-	.	.	.	.	.	.	.	-	-	.	C	.	.	-	-	.	C	.	C	.	.	S	-	C	-	-	-	-	-	-	C	G	G	.	R	.	.	-	-	-	-	-	T
Ab6	-1	0	0	0	-	-	S	.	.	.	K	S	K	-	-	.	S	.	.	-	-	-	-	.	S	Y	.	G	A	S	A	-	-	-	-	-	C	S	G	G	R	.	.	-	-	-	-	A	C
Ab7	-1	0	0	0	-	-	.	.	.	.	S	.	.	-	-	.	C	A	.	T	-	.	C	A	C	.	.	.	-	.	-	-	-	-	-	-	C	K	G	.	A	R	S	-	-	-	-	-	C
Ab8	-1	0	0	0	-	-	.	.	.	.	.	.	.	-	-	.	C	.	.	-	-	.	.	S	C	.	.	G	-	C	-	-	-	-	-	-	C	G	G	.	G	.	.	-	-	-	-	-	C
Ab9	-1	0	0	0	-	-	.	.	.	.	.	.	.	-	-	.	C	.	.	-	-	.	.	.	C	.	.	G	-	C	-	-	-	-	-	-	C	G	G	.	G	.	.	-	-	-	-	-	C
Ab10	-1	0	0	0	-	-	.	.	.	.	.	.	.	-	-	.	C	.	.	-	-	.	.	.	C	.	.	G	-	C	-	-	-	-	-	-	C	G	G	.	G	.	.	-	-	-	-	-	C
Ab11	-1	0	0	0	-	C	.	T	T	T	.	.	.	-	-	S	C	.	.	-	-	.	.	C	C	.	.	T	T	-	-	-	-	G	G	G	G	G	G	G	G	.	.	G	G	G	G	G	C
Ab12	-1	0	0	0	-	-	.	.	.	.	.	.	.	-	-	.	C	.	.	-	-	.	.	.	C	.	.	G	-	C	-	-	-	-	-	-	C	G	G	.	G	.	.	-	-	-	-	-	C
Ab13	-1	0	0	0	G	Y	Y	T	T	T	.	.	.	-	-	.	C	.	.	-	-	S	Y	Y	.	.	S	K	T	C	C	Y	G	G	G	M	S	G	G	G	.	R	G	G	G	G	G	G	C
Ab14	-1	0	0	0	-	-	M	.	.	Y	G	.	.	G	-	-	-	-	-	-	-	A	Y	S	S	M	.	G	G	R	G	-	-	-	-	-	G	.	A	.	S	G	.	Y	T	T	C	A	T
G16	-1	0	0	0	-	-	.	.	.	.	.	.	.	-	-	.	C	.	.	-	-	.	.	.	C	.	.	G	-	M	-	-	-	-	-	-	C	G	G	.	G	.	.	-	-	-	-	-	C
G17	-1	0	0	0	-	-	.	.	.	.	Y	.	.	-	-	.	.	.	M	-	-	R	Y	.	C	.	.	S	-	.	-	-	-	-	-	-	C	G	G	.	S	M	.	-	-	-	-	-	C
Ab19	-1	0	0	0	-	-	.	.	.	.	.	.	.	-	-	.	C	.	.	-	-	.	.	.	C	.	.	G	-	C	-	-	-	-	-	-	C	G	G	.	G	.	.	-	-	-	-	-	C
Ab20	-1	0	0	0	-	-	.	.	.	.	.	.	.	-	-	.	S	.	.	-	-	.	W	.	C	.	.	G	-	C	-	-	-	-	-	-	C	G	G	.	G	.	.	-	-	-	-	-	C
Ab21	-1	0	0	0	-	-	.	M	S	.	S	.	.	-	-	.	C	.	.	-	-	.	Y	S	C	.	.	G	-	C	-	-	-	-	-	-	C	.	G	.	G	R	M	-	-	-	-	-	C
B22	-1	0	0	0	-	-	.	.	.	.	.	.	.	-	-	.	S	.	.	-	-	S	.	.	T	.	.	C	S	C	-	-	-	-	-	-	C	G	G	.	G	.	.	-	-	-	-	-	C
B24	-1	0	0	0	-	-	.	.	.	.	.	.	.	-	-	.	C	.	.	-	-	.	.	.	C	.	.	G	-	C	-	-	-	-	-	-	C	G	G	.	G	.	.	-	-	-	-	-	-
B25	-1	0	0	0	-	-	.	.	.	.	.	.	.	-	-	.	C	.	.	-	-	.	.	.	C	.	.	G	-	C	-	-	-	-	-	-	C	G	G	.	G	.	.	-	-	-	-	-	C
B26	-1	0	0	0	-	-	.	.	.	.	.	.	.	-	-	.	C	.	.	-	-	.	.	.	C	.	.	G	-	C	-	-	-	-	-	-	C	G	G	.	G	.	.	-	-	-	-	-	C
B27	-1	0	0	0	-	-	M	.	M	.	.	.	K	C	T	.	.	M	S	-	-	.	.	K	S	.	M	G	-	.	-	-	-	-	-	-	C	K	G	.	G	.	.	-	-	-	-	-	C
B28	-1	0	0	0	-	-	.	.	.	.	.	.	.	-	-	.	C	.	.	-	-	.	.	.	C	.	.	G	-	C	-	-	-	-	-	-	C	G	G	.	G	.	.	-	-	-	-	-	C
B29	-1	0	0	0	-	-	.	.	.	.	.	.	.	-	-	.	C	.	.	-	-	.	.	.	C	.	.	G	-	C	-	-	-	-	-	-	C	G	G	G	G	.	.	-	-	-	-	-	A
B30	-1	0	0	0	-	-	.	.	.	.	.	.	.	-	-	.	.	M	S	-	-	.	.	.	-	.	S	C	S	C	-	-	-	-	-	-	S	G	G	R	G	.	.	-	-	-	-	-	C
B32	-1	0	0	0	-	-	.	.	.	.	.	.	.	-	-	.	C	.	.	-	-	.	.	.	C	.	.	G	-	C	-	-	-	-	-	-	C	G	G	.	G	.	.	-	-	-	-	-	C
B33	-1	0	0	0	-	-	.	.	.	.	.	.	.	-	-	.	C	.	.	-	-	.	.	.	C	.	.	G	-	C	-	-	-	-	-	-	C	G	G	.	G	.	.	C	T	-	C	A	A
B34	-1	0	0	0	-	-	.	.	.	.	.	.	.	-	-	S	R	S	R	-	-	S	.	S	C	.	.	S	-	C	-	-	-	-	-	-	C	G	G	.	G	G	M	-	-	-	-	-	C
B35	-1	0	0	0	-	-	Y	.	.	.	.	.	.	-	-	.	S	.	S	-	-	.	W	S	C	.	.	S	-	C	-	-	-	-	-	-	C	G	G	.	R	R	M	-	-	-	-	-	C
B36	-1	0	0	0	-	-	Y	.	.	.	Y	.	.	-	-	.	C	S	S	-	-	S	.	.	.	.	.	G	-	S	-	-	-	-	-	-	C	G	G	.	G	.	.	-	-	-	-	-	C
B37	-1	0	0	0	-	-	.	.	.	.	.	.	.	-	-	.	C	.	.	-	-	.	.	.	C	.	.	G	-	C	-	-	-	-	-	-	C	G	G	.	G	.	.	-	-	-	-	-	C
B38	-1	0	0	0	-	-	.	.	.	.	.	.	.	-	-	.	.	.	.	-	-	S	.	S	C	.	.	S	-	C	-	-	-	-	-	-	S	G	G	.	G	.	.	-	-	-	-	-	C
B39	-1	0	0	0	-	-	.	.	.	.	.	.	.	-	-	.	C	.	.	-	-	.	C	.	C	.	.	G	-	C	-	-	-	-	-	-	C	K	.	.	G	.	.	-	-	-	-	-	T
B41	-1	0	0	0	-	-	.	.	S	S	.	.	.	-	-	.	.	.	.	-	-	.	W	.	C	.	.	G	-	C	-	-	-	-	-	-	C	G	G	.	G	M	.	-	-	-	-	-	C
B42	-1	0	0	0	-	-	.	.	.	.	.	.	.	-	-	.	C	.	.	-	-	.	C	.	C	.	.	G	-	C	-	-	-	-	-	-	C	G	G	.	G	.	.	C	T	-	C	A	A
B43	-1	0	0	0	-	-	K	S	.	.	.	.	.	-	-	.	S	.	.	G	M	.	.	.	S	M	S	M	-	C	-	-	-	-	-	-	G	G	G	G	G	.	.	-	-	-	-	-	C
B44	-1	0	0	0	-	-	.	.	.	.	.	.	.	-	-	.	C	.	.	-	-	.	.	.	C	.	.	G	-	C	-	-	-	-	-	-	C	G	G	.	G	.	.	C	T	-	C	A	A
D48	-1	0	0	0	-	-	.	.	.	.	.	.	.	-	-	.	C	.	.	-	-	.	.	.	C	.	.	G	-	C	-	-	-	-	-	-	C	G	G	.	G	.	.	C	T	-	C	A	A
D49	-1	0	0	0	-	-	.	.	.	.	.	.	.	-	-	.	C	.	.	-	-	.	.	.	C	.	.	G	-	C	-	-	-	-	-	-	C	G	G	G	G	.	.	-	-	-	-	-	A
D50	-1	0	0	0	-	-	.	.	.	.	.	.	.	-	-	.	C	.	.	-	-	.	.	.	C	.	.	G	-	C	-	-	-	-	-	-	C	G	G	G	G	.	.	-	-	-	-	-	A
D51	-1	0	0	0	-	-	.	.	.	T	A	C	T	-	-	.	A	.	.	-	-	K	C	R	M	M	.	.	-	C	-	-	-	-	-	-	C	G	.	.	A	.	.	A	K	-	T	T	Y
D52	-1	0	0	0	-	-	.	.	.	.	.	.	.	-	-	.	C	.	.	-	-	.	.	.	C	.	.	G	-	C	-	-	-	-	-	-	C	G	G	G	G	.	.	-	-	-	-	-	A
D53	-1	0	0	0	-	-	.	.	.	.	.	.	.	-	-	.	C	.	.	-	-	.	.	.	C	.	.	G	-	C	-	-	-	-	-	-	C	G	G	.	G	.	.	-	-	-	-	-	C
D54	-1	0	0	0	-	-	.	.	.	.	.	.	.	-	-	.	C	.	.	-	-	.	.	.	C	.	.	G	-	C	-	-	-	-	-	-	C	G	G	.	G	.	.	-	-	-	-	-	C
D55	-1	0	0	0	-	C	.	T	T	T	.	.	.	-	-	.	C	.	.	-	-	.	.	C	C	.	.	T	T	C	C	T	G	G	G	A	G	G	G	G	G	.	.	G	G	G	G	G	C
D56	-1	0	0	0	-	-	S	.	.	.	.	.	.	-	-	K	C	.	.	-	-	Y	C	.	C	.	.	C	-	C	-	-	-	-	-	-	C	G	G	.	S	.	.	-	-	-	-	-	Y
E57	-1	0	0	0	-	-	.	.	.	.	.	.	.	-	-	.	C	.	.	-	-	.	.	.	C	.	.	G	-	C	-	-	-	-	-	-	C	G	G	G	G	.	.	-	-	-	-	-	A
E58	-1	0	0	0	-	-	.	.	.	.	.	.	.	-	-	.	C	.	.	-	-	.	.	.	C	.	.	G	-	C	-	-	-	-	-	-	C	G	G	G	G	.	.	-	-	-	-	-	A
F59	-1	0	0	0	-	-	S	.	.	.	.	S	.	-	-	.	C	.	.	-	-	.	.	.	C	.	.	G	-	C	-	-	-	-	-	-	C	G	G	G	G	.	.	-	-	-	-	-	A
F60	-1	0	0	0	-	-	-	-	-	-	-	-	-	-	-	-	-	-	-	-	-	-	-	.	C	.	.	G	-	C	-	-	-	-	-	-	C	G	A	.	G	.	.	-	-	-	-	-	-
F61	-1	0	0	0	-	-	.	.	.	.	.	.	.	-	-	.	C	.	.	-	-	.	C	.	C	.	.	G	-	C	-	-	-	-	-	-	C	G	G	.	G	.	.	-	-	-	-	-	T
F62	-1	0	0	0	-	-	T	.	.	.	.	-	-	-	-	-	C	.	A	G	A	A	G	.	A	T	.	A	T	T	C	-	-	-	-	-	C	G	G	G	G	G	A	-	-	-	-	-	T
F63	-1	0	0	0	-	-	.	.	.	.	.	.	.	-	-	.	C	.	.	-	-	.	.	.	C	.	.	G	-	C	-	-	-	-	-	-	C	G	G	G	G	.	.	-	-	-	-	-	A
G64	-1	0	0	0	-	-	.	.	.	.	.	.	.	-	-	.	C	.	.	-	-	.	.	.	C	.	.	G	-	C	-	-	-	-	-	-	C	G	G	G	G	.	.	-	-	-	-	-	A
G65	-1	0	0	0	-	-	.	.	.	.	.	.	.	-	-	.	C	.	.	-	-	.	.	.	C	.	.	G	-	C	-	-	-	-	-	-	C	G	G	.	G	.	.	-	-	-	-	-	C
G66	-1	0	0	0	-	-	.	.	.	.	.	.	.	-	-	.	C	.	.	-	-	.	.	.	C	.	.	G	-	C	-	-	-	-	-	-	C	G	G	.	G	.	.	-	-	-	-	-	C
G67	-1	0	0	0	-	-	.	.	.	.	.	.	.	-	-	.	S	.	.	-	-	S	C	.	C	.	.	S	-	C	-	-	-	-	-	-	C	G	G	.	G	.	.	-	-	-	-	-	T
G68	-1	0	0	0	-	-	.	.	.	.	.	.	.	-	-	.	C	.	.	-	-	.	.	.	C	.	.	G	-	C	-	-	-	-	-	-	C	G	G	G	G	.	.	-	-	-	-	-	A
G69	-1	0	0	0	-	-	.	.	.	.	.	.	.	-	-	.	C	.	.	-	-	.	.	.	C	.	.	G	-	C	-	-	-	-	-	-	C	G	G	.	G	.	.	C	T	-	C	A	A
G70	-1	0	0	0	-	-	.	.	.	.	.	.	.	-	-	.	C	.	.	-	-	.	.	.	C	.	.	G	-	C	-	-	-	-	-	-	C	G	K	G	G	.	.	-	-	-	-	-	A
J74	-1	0	0	0	-	-	.	.	.	.	.	.	.	-	-	.	Y	.	.	-	-	.	C	.	C	.	.	G	-	C	-	-	-	-	-	-	C	G	G	.	G	.	.	-	-	-	-	-	T
J76	-1	0	0	0	-	-	.	.	.	.	.	.	.	-	-	.	C	.	.	-	-	.	.	.	C	.	.	G	-	C	-	-	-	-	-	-	C	G	G	G	G	.	.	-	-	-	-	-	A
J77	-1	0	0	0	-	-	.	.	.	.	.	.	.	-	-	.	C	.	.	-	-	.	.	.	C	.	.	G	-	C	-	-	-	-	-	-	C	G	G	G	G	.	.	-	-	-	-	-	A
J78	-1	0	0	0	-	-	.	.	.	.	.	.	.	-	-	.	.	.	.	-	-	R	W	.	C	.	.	G	-	C	-	-	-	-	-	-	C	G	G	.	G	.	.	-	-	-	-	-	.
J79	-1	0	0	0	-	-	.	.	.	.	.	.	.	-	-	.	C	.	.	-	-	.	.	.	C	.	.	G	-	C	-	-	-	-	-	-	C	G	G	.	G	.	.	-	-	-	-	-	C
J80	-1	0	0	0	-	-	.	.	.	.	.	.	.	-	-	.	Y	.	.	-	-	.	C	.	C	.	.	K	-	C	-	-	-	-	-	-	C	G	G	.	G	.	.	-	-	-	-	-	T
J81	-1	0	0	0	-	-	.	.	.	.	.	.	.	-	-	.	C	.	.	-	-	.	.	.	C	.	S	G	A	C	-	-	-	-	-	-	C	G	G	.	G	.	.	-	-	-	-	-	C
J82	-1	0	0	0	-	-	.	.	.	.	.	.	.	-	-	.	C	.	.	-	-	.	.	.	C	.	.	G	-	C	-	-	-	-	-	-	C	G	G	.	G	.	.	C	T	-	C	A	A
J83	-1	0	0	0	-	-	.	.	.	.	.	.	.	-	-	.	C	.	.	-	-	.	.	.	C	.	.	G	-	C	-	-	-	-	-	-	C	G	G	.	G	.	.	C	T	-	C	A	A
J84	-1	0	0	0	-	-	.	.	.	.	.	.	.	-	-	.	C	.	.	-	-	.	.	.	C	.	.	G	-	C	-	-	-	-	-	-	C	G	G	.	G	.	.	C	T	-	C	A	A
J85	-1	0	0	0	-	-	.	.	.	.	.	.	.	-	-	.	C	.	.	-	-	.	.	.	C	.	.	G	-	C	-	-	-	-	-	-	C	G	G	.	G	.	.	-	-	-	-	-	C
F86	-1	0	0	0	-	-	.	.	.	.	.	.	.	-	-	.	C	.	.	-	-	.	.	.	C	.	.	G	-	C	-	-	-	-	-	-	C	G	G	.	G	.	.	C	T	-	C	A	A
KU855474.1	-1	0	0	0	A	A	.	A	T	A	A	A	.	-	-	A	A	A	.	G	A	.	C	T	T	.	T	G	-	-	-	-	-	-	-	-	C	T	G	C	G	G	.	-	-	-	-	-	C
	3	3	3	3	3	3	3	3	3	4	4	4	4	4	4	4	4	4	4	4	4	4	4	4	4	4	4	4	4	4	4	4	4	4	4	4	4	4	4	4	4	4	4	4	4	4	4	4	4
	9	9	9	9	9	9	9	9	9	0	0	0	0	0	0	0	0	0	0	1	1	1	1	1	1	1	1	1	1	2	2	2	2	2	2	2	2	2	2	3	3	3	3	3	3	3	3	3	3
	1	2	3	4	5	6	7	8	9	0	1	2	3	4	5	6	7	8	9	0	1	2	3	4	5	6	7	8	9	0	1	2	3	4	5	6	7	8	9	0	1	2	3	4	5	6	7	8	9
Ab1	-1	0	0	0	-	-	-	-	-	-	-	-	-	-	-	-	-	-	-	-	-	-	-	-	-	-	G	A	A	C	A	S	T	G	-	-	-	-	T	Y	T	M	W	-	-	W	G	-	G
Ab2	-1	0	0	0	-	-	-	-	-	-	-	-	-	-	-	-	-	-	-	-	-	-	-	-	-	-	.	.	.	.	.	C	.	.	-	-	-	-	.	.	.	G	A	-	-	A	.	-	.
Ab3	-1	0	0	0	-	-	-	-	-	-	-	-	-	-	-	-	-	-	-	-	-	-	-	-	-	-	.	.	.	.	.	C	.	.	-	-	-	-	.	C	W	G	A	-	-	A	.	-	.
Ab4	-1	0	0	0	-	-	-	-	-	-	-	-	-	-	-	-	-	-	-	-	-	-	-	-	-	-	.	.	.	.	.	C	.	.	-	-	-	-	.	C	.	R	A	-	-	A	.	-	.
Ab6	-1	0	0	0	-	-	-	-	-	-	-	-	-	-	-	-	-	-	-	-	-	-	-	-	-	-	.	R	.	.	.	C	.	.	-	-	-	-	.	S	.	G	A	-	-	A	R	-	.
Ab7	-1	0	0	0	-	-	-	-	-	-	-	-	-	-	-	-	-	-	-	-	-	-	-	-	-	-	-	-	.	.	R	A	.	A	-	-	-	-	.	T	.	G	A	-	-	A	.	-	A
Ab8	-1	0	0	0	-	-	-	-	-	-	-	-	-	-	-	-	-	-	-	-	-	-	-	-	-	-	.	.	.	.	R	C	.	.	-	-	-	-	.	C	.	G	A	-	-	A	K	-	.
Ab9	-1	0	0	0	-	-	-	-	-	-	-	-	-	-	-	-	-	-	-	-	-	-	-	-	-	-	.	.	.	.	.	C	.	.	-	-	-	-	.	C	.	G	A	-	-	A	.	-	.
Ab10	-1	0	0	0	-	-	-	-	-	-	-	-	-	-	-	-	-	-	-	-	-	-	-	-	-	-	.	.	.	.	.	C	.	.	-	-	-	-	.	C	.	G	A	-	-	A	.	-	.
Ab11	-1	0	0	0	-	-	-	-	-	-	-	-	-	-	-	-	-	-	S	C	T	K	A	G	G	G	C	.	G	.	.	A	.	.	R	C	G	C	.	M	G	R	A	C	A	G	S	C	A
Ab12	-1	0	0	0	-	-	-	-	-	-	-	-	-	-	-	-	-	-	-	-	-	-	-	-	-	-	.	.	.	.	.	C	.	.	-	-	-	-	.	C	.	G	A	-	-	A	.	-	.
Ab13	-1	0	0	0	-	-	-	-	-	-	-	-	-	-	-	-	-	-	Y	Y	S	S	A	R	G	G	M	.	C	M	.	A	K	.	A	S	S	K	.	M	G	.	A	C	A	G	.	C	A
Ab14	-1	0	0	0	-	-	-	-	-	-	-	-	-	-	-	-	-	-	-	-	-	-	-	-	-	-	.	G	C	.	R	R	.	A	C	C	-	-	W	M	C	K	R	-	-	R	R	A	S
G16	-1	0	0	0	-	-	-	-	-	-	-	-	-	-	-	-	-	-	-	-	-	-	-	-	-	-	.	.	.	.	.	C	.	.	-	-	-	-	.	S	.	G	A	-	-	A	.	-	.
G17	-1	0	0	0	-	-	-	-	-	-	-	-	-	-	-	-	-	-	-	-	-	-	-	-	-	-	.	R	.	.	R	M	.	K	-	-	-	-	.	.	W	R	A	-	-	A	.	-	.
Ab19	-1	0	0	0	-	-	-	-	-	-	-	-	-	-	-	-	-	-	-	-	-	-	-	-	-	-	.	.	.	.	.	C	.	.	-	-	-	-	.	C	.	G	A	-	-	A	.	-	.
Ab20	-1	0	0	0	-	-	-	-	-	-	-	-	-	-	-	-	-	-	-	-	-	-	-	-	-	-	.	.	.	.	.	C	.	.	-	-	-	-	W	C	.	G	A	-	-	A	.	-	.
Ab21	-1	0	0	0	-	-	-	-	-	-	-	-	-	-	-	-	-	-	-	-	-	-	-	-	-	-	.	.	.	.	W	C	.	.	G	-	-	-	.	W	.	K	A	T	T	A	K	-	.
B22	-1	0	0	0	-	-	-	-	-	-	-	-	-	-	-	-	-	-	-	-	-	-	-	-	-	-	.	.	.	.	.	C	.	.	-	-	-	-	.	S	.	G	A	A	-	A	.	G	T
B24	-1	0	0	0	-	-	-	-	-	-	-	-	-	-	-	-	-	-	-	-	-	-	-	-	-	-	-	-	-	-	-	-	-	-	-	-	-	-	-	-	-	-	-	-	-	-	-	-	-
B25	-1	0	0	0	-	-	-	-	-	-	-	-	-	-	-	-	-	-	-	-	-	-	-	-	-	-	.	.	.	.	.	C	.	.	-	-	-	-	.	C	.	G	A	-	-	A	.	-	.
B26	-1	0	0	0	-	-	-	-	-	-	-	-	-	-	-	-	-	-	-	-	-	-	-	-	-	-	.	.	.	.	.	C	.	.	-	-	-	-	.	C	.	G	A	-	-	A	.	-	.
B27	-1	0	0	0	-	-	-	-	-	-	-	-	-	-	-	-	-	-	-	-	-	-	-	-	-	-	.	.	.	.	.	C	.	.	-	-	-	-	.	C	.	G	A	-	-	A	.	-	.
B28	-1	0	0	0	-	-	-	-	-	-	-	-	-	-	-	-	-	-	-	-	-	-	-	-	-	-	.	.	.	.	.	C	.	.	-	-	-	-	.	C	.	G	A	-	-	A	.	-	.
B29	-1	0	0	0	-	-	-	-	-	-	-	-	-	-	-	-	-	-	-	-	-	-	-	-	-	-	.	.	.	.	.	C	.	.	-	-	-	-	.	C	.	G	A	-	-	A	.	-	.
B30	-1	0	0	0	-	-	-	-	-	-	-	-	-	-	-	-	-	-	-	-	-	-	-	-	-	-	R	.	.	.	M	C	Y	R	-	-	-	-	.	M	.	G	A	A	-	G	.	T	W
B32	-1	0	0	0	-	-	-	-	-	-	-	-	-	-	-	-	-	-	-	-	-	-	-	-	-	-	.	.	.	.	.	C	.	.	-	-	-	-	.	C	.	G	A	-	-	A	.	-	.
B33	-1	0	0	0	-	-	-	-	-	-	-	-	-	-	-	-	-	-	-	-	-	-	-	-	-	-	-	-	-	.	.	C	.	.	-	-	-	-	.	C	.	G	A	-	-	A	.	-	.
B34	-1	0	0	0	-	-	-	-	-	-	-	-	-	-	-	-	-	-	-	-	-	-	-	-	-	-	.	S	M	.	R	C	Y	.	-	T	-	-	.	C	.	G	A	-	-	A	.	-	.
B35	-1	0	0	0	-	-	-	-	-	-	-	-	-	-	-	-	-	-	-	-	-	-	-	-	-	-	.	-	.	T	K	C	W	.	A	C	-	-	.	C	.	G	A	-	-	A	W	-	R
B36	-1	0	0	0	-	-	-	-	-	-	-	-	-	-	-	-	-	-	-	-	-	-	-	-	-	-	.	.	R	M	.	C	Y	.	-	-	-	-	.	S	.	G	A	-	-	A	.	A	.
B37	-1	0	0	0	-	-	-	-	-	-	-	-	-	-	-	-	-	-	-	-	-	-	-	-	-	-	.	.	.	.	.	C	.	.	-	-	-	-	.	C	.	G	A	-	-	A	.	-	.
B38	-1	0	0	0	-	-	-	-	-	-	-	-	-	-	-	-	-	-	-	-	-	-	-	-	-	-	.	.	.	.	.	C	.	.	-	-	-	-	.	S	.	G	A	-	-	A	.	-	.
B39	-1	0	0	0	-	-	-	-	-	-	-	-	-	-	-	-	-	-	-	-	-	-	-	-	-	-	K	.	.	.	.	C	.	.	-	-	-	-	.	G	.	K	A	-	-	A	.	-	.
B41	-1	0	0	0	-	-	-	-	-	-	-	-	-	-	-	-	-	-	-	-	-	-	-	-	-	-	.	.	.	.	.	C	.	.	-	-	-	-	W	C	.	G	A	-	-	A	.	-	.
B42	-1	0	0	0	T	A	C	C	G	A	T	A	C	A	G	A	A	A	A	T	C	G	T	T	A	A	A	.	C	.	.	C	.	.	-	-	-	-	.	C	.	G	A	-	-	A	.	-	.
B43	-1	0	0	0	-	-	-	-	-	-	-	-	-	-	-	-	-	-	-	-	-	-	-	-	-	-	R	S	.	.	.	C	.	.	-	-	-	-	K	R	.	G	A	-	-	A	.	-	.
B44	-1	0	0	0	-	-	-	-	-	-	-	-	-	-	-	-	-	-	-	-	-	-	-	-	-	-	-	-	-	.	.	C	.	.	-	-	-	-	.	C	.	G	A	-	-	A	.	-	.
D48	-1	0	0	0	-	-	-	-	-	-	-	-	-	-	-	-	-	-	-	-	-	-	-	-	-	-	-	-	-	.	.	C	.	.	-	-	-	-	.	C	.	G	A	-	-	A	.	-	.
D49	-1	0	0	0	-	-	-	-	-	-	-	-	-	-	-	-	-	-	-	-	-	-	-	-	-	-	.	.	.	.	.	C	.	.	-	-	-	-	.	C	.	G	A	-	-	A	.	-	.
D50	-1	0	0	0	-	-	-	-	-	-	-	-	-	-	-	-	-	-	-	-	-	-	-	-	-	-	.	.	.	.	.	C	.	.	-	-	-	-	.	C	.	G	A	-	-	A	.	-	.
D51	-1	0	0	0	-	-	-	-	-	-	-	-	-	-	-	-	-	-	-	-	-	-	-	-	-	-	S	.	.	A	.	C	W	.	-	-	-	-	K	.	.	A	A	-	-	.	.	-	.
D52	-1	0	0	0	-	-	-	-	-	-	-	-	-	-	-	-	-	-	-	-	-	-	-	-	-	-	.	.	.	.	.	C	.	.	-	-	-	-	.	C	.	G	A	-	-	A	.	-	.
D53	-1	0	0	0	-	-	-	-	-	-	-	-	-	-	-	-	-	-	-	-	-	-	-	-	-	-	.	.	.	.	M	C	.	.	-	-	-	-	.	C	.	G	A	-	-	A	.	-	.
D54	-1	0	0	0	-	-	-	-	-	-	-	-	-	-	-	-	-	-	-	-	-	-	-	-	-	-	.	.	.	.	M	C	.	.	-	-	-	-	.	C	.	G	A	-	-	A	.	-	.
D55	-1	0	0	0	-	-	-	-	-	-	-	-	-	-	-	-	-	-	C	T	T	G	A	G	G	G	C	.	G	.	.	A	.	.	A	C	G	C	.	C	G	G	A	C	A	G	.	C	A
D56	-1	0	0	0	-	-	-	-	-	-	-	-	-	-	-	-	-	-	-	-	-	-	-	-	-	-	S	.	.	.	M	C	.	.	-	-	-	-	.	T	Y	G	A	-	-	A	.	-	.
E57	-1	0	0	0	-	-	-	-	-	-	-	-	-	-	-	-	-	-	-	-	-	-	-	-	-	-	.	.	.	.	.	C	.	.	-	-	-	-	.	C	.	G	A	-	-	A	.	-	.
E58	-1	0	0	0	-	-	-	-	-	-	-	-	-	-	-	-	-	-	-	-	-	-	-	-	-	-	.	.	.	.	.	C	.	.	-	-	-	-	.	C	.	G	A	-	-	A	.	-	.
F59	-1	0	0	0	-	-	-	-	-	-	-	-	-	-	-	-	-	-	-	-	-	-	-	-	-	-	.	.	.	.	.	M	.	.	-	-	-	-	.	.	.	G	A	-	-	A	.	-	.
F60	-1	0	0	0	-	-	-	-	-	-	-	-	-	-	-	-	-	-	-	-	-	-	-	-	-	-	.	.	.	.	M	C	.	.	-	-	-	-	.	S	.	G	A	-	-	A	.	-	T
F61	-1	0	0	0	-	-	-	-	-	-	-	-	-	-	-	-	-	-	-	-	-	-	-	-	-	-	.	.	.	.	.	C	.	.	-	-	-	-	.	C	.	G	A	-	-	A	.	-	.
F62	-1	0	0	0	-	-	-	-	-	-	-	-	-	-	-	-	-	-	-	-	-	-	-	-	-	-	A	C	.	T	.	T	.	.	-	-	-	-	-	-	M	G	R	T	-	A	T	C	S
F63	-1	0	0	0	-	-	-	-	-	-	-	-	-	-	-	-	-	-	-	-	-	-	-	-	-	-	.	.	.	.	.	C	.	.	-	-	-	-	.	C	.	G	A	-	-	A	.	-	.
G64	-1	0	0	0	-	-	-	-	-	-	-	-	-	-	-	-	-	-	-	-	-	-	-	-	-	-	.	.	.	.	.	C	.	.	-	-	-	-	.	C	.	G	A	-	-	A	.	-	.
G65	-1	0	0	0	-	-	-	-	-	-	-	-	-	-	-	-	-	-	-	-	-	-	-	-	-	-	.	.	.	.	.	C	.	.	-	-	-	-	.	C	.	G	A	-	-	A	.	-	.
G66	-1	0	0	0	-	-	-	-	-	-	-	-	-	-	-	-	-	-	-	-	-	-	-	-	-	-	.	.	.	.	.	C	.	.	-	-	-	-	.	C	.	G	A	-	-	A	.	-	.
G67	-1	0	0	0	-	-	-	-	-	-	-	-	-	-	-	-	-	-	-	-	-	-	-	-	-	-	.	.	.	.	.	C	.	.	-	-	-	-	.	.	.	G	A	-	-	A	.	-	.
G68	-1	0	0	0	-	-	-	-	-	-	-	-	-	-	-	-	-	-	-	-	-	-	-	-	-	-	.	.	.	.	.	C	.	.	-	-	-	-	.	.	.	G	A	-	-	A	.	-	.
G69	-1	0	0	0	-	-	-	-	-	-	-	-	-	-	-	-	-	-	-	-	-	-	-	-	-	-	-	-	-	.	.	C	.	.	-	-	-	-	.	C	.	G	A	-	-	A	.	-	.
G70	-1	0	0	0	-	-	-	-	-	-	-	-	-	-	-	-	-	-	-	-	-	-	-	-	-	-	.	.	.	.	.	C	.	.	-	-	-	-	.	C	.	G	A	-	-	A	.	-	.
J74	-1	0	0	0	-	-	-	-	-	-	-	-	-	-	-	-	-	-	-	-	-	-	-	-	-	-	.	.	.	.	.	C	.	.	-	-	-	-	.	C	.	G	A	-	-	A	.	-	.
J76	-1	0	0	0	-	-	-	-	-	-	-	-	-	-	-	-	-	-	-	-	-	-	-	-	-	-	.	.	.	.	.	C	.	.	-	-	-	-	.	C	.	G	A	-	-	A	.	-	.
J77	-1	0	0	0	-	-	-	-	-	-	-	-	-	-	-	-	-	-	-	-	-	-	-	-	-	-	.	.	.	.	.	C	.	.	-	-	-	-	.	C	.	G	A	-	-	A	.	-	.
J78	-1	0	0	0	-	-	-	-	-	-	-	-	-	-	-	-	-	-	-	-	-	-	-	-	-	-	.	.	.	.	.	M	.	.	-	-	-	-	.	.	.	G	A	-	-	A	.	-	.
J79	-1	0	0	0	-	-	-	-	-	-	-	-	-	-	-	-	-	-	-	-	-	-	-	-	-	-	.	.	.	.	.	C	.	.	-	-	-	-	.	S	.	G	A	-	-	A	.	-	.
J80	-1	0	0	0	-	-	-	-	-	-	-	-	-	-	-	-	-	-	-	-	-	-	-	-	-	-	.	.	.	.	.	C	.	.	-	-	-	-	.	.	.	G	A	-	-	A	.	-	.
J81	-1	0	0	0	-	-	-	-	-	-	-	-	-	-	-	-	-	-	-	-	-	-	-	-	-	-	.	.	.	.	.	C	K	.	-	-	-	-	W	S	K	G	A	-	-	A	.	-	.
J82	-1	0	0	0	-	-	-	-	-	-	-	-	-	-	-	-	-	-	-	-	-	-	-	-	-	-	-	-	-	.	.	C	.	.	-	-	-	-	.	C	.	G	A	-	-	A	.	-	.
J83	-1	0	0	0	-	-	-	-	-	-	-	-	-	-	-	-	-	-	-	-	-	-	-	-	-	-	-	-	-	.	.	C	.	.	-	-	-	-	.	C	.	G	A	-	-	A	.	-	.
J84	-1	0	0	0	-	-	-	-	-	-	-	-	-	-	-	-	-	-	-	-	-	-	-	-	-	-	-	-	-	.	.	C	.	.	-	-	-	-	.	C	.	G	A	-	-	A	.	-	.
J85	-1	0	0	0	-	-	-	-	-	-	-	-	-	-	-	-	-	-	-	-	-	-	-	-	-	-	.	.	.	.	.	C	.	.	-	-	-	-	.	C	.	G	A	-	-	A	.	-	.
F86	-1	0	0	0	-	-	-	-	-	-	-	-	-	-	-	-	-	-	-	-	-	-	-	-	-	-	-	-	-	.	.	C	.	.	-	-	-	-	.	C	.	G	A	-	-	A	.	-	.
KU855474.1	-1	0	0	0	-	-	-	-	-	-	-	-	-	-	-	-	-	-	-	-	-	-	-	-	-	-	-	G	G	T	G	C	.	T	G	C	-	-	C	G	C	A	G	C	A	G	.	A	.
	4	4	4	4	4	4	4	4	4	4	4	4	4	4	4	4	4	4	4	4	4	4	4	4	4	4	4	4	4	4	4	5	5	5	5	5	5	5	5	5	5	5	5	5	5	5	5	5	5
	6	7	7	7	7	7	7	7	7	7	7	8	8	8	8	8	8	8	8	8	8	9	9	9	9	9	9	9	9	9	9	0	0	0	0	0	0	0	0	0	0	1	1	1	1	1	1	1	1
	9	0	1	2	3	4	5	6	7	8	9	0	1	2	3	4	5	6	7	8	9	0	1	2	3	4	5	6	7	8	9	0	1	2	3	4	5	6	7	8	9	0	1	2	3	4	5	6	7
Ab1	-1	0	0	0	-	-	-	A	W	C	G	-	T	T	A	A	A	A	C	T	-	T	T	C	A	A	C	A	A	C	-	-	-	-	-	-	-	-	-	-	-	-	-	-	-	-	-	-	-
Ab2	-1	0	0	0	-	-	-	.	Y	M	.	-	.	.	.	.	.	.	.	.	-	.	.	.	.	.	.	.	.	.	-	-	-	-	-	-	-	-	-	-	-	-	-	-	-	-	-	-	-
Ab3	-1	0	0	0	-	-	-	.	T	.	.	-	A	A	.	.	.	.	.	.	-	.	.	T	.	.	.	G	.	.	-	-	-	-	-	-	-	-	-	-	-	-	-	-	-	-	-	-	-
Ab4	-1	0	0	0	A	-	A	.	Y	.	.	-	C	.	.	.	.	.	.	.	-	.	.	.	.	.	.	.	.	.	-	-	-	-	-	-	-	-	-	-	-	-	-	-	-	-	-	-	-
Ab6	-1	0	0	0	-	-	-	.	K	T	.	-	-	.	.	.	.	.	.	.	-	.	.	.	G	.	T	C	T	.	-	-	-	-	-	-	-	-	-	-	-	-	-	-	-	-	-	-	-
Ab7	-1	0	0	0	-	-	-	.	.	Y	R	-	W	.	M	.	.	.	.	W	-	.	.	M	.	.	M	R	.	A	-	-	-	-	-	-	-	-	-	-	-	-	-	-	-	-	-	-	-
Ab8	-1	0	0	0	-	-	-	.	T	.	.	-	.	.	.	.	.	.	.	.	-	.	.	.	.	.	.	.	.	.	-	-	-	-	-	-	-	-	-	-	-	-	-	-	-	-	-	-	-
Ab9	-1	0	0	0	-	-	-	.	T	.	.	-	.	.	.	.	.	M	.	.	-	.	.	.	.	M	.	.	.	.	A	A	T	C	G	T	T	A	A	A	M	C	T	T	T	C	A	A	C
Ab10	-1	0	0	0	-	-	-	.	T	.	.	-	.	.	.	.	.	.	.	.	-	.	.	.	.	.	.	.	.	.	-	-	-	-	-	-	-	-	-	-	-	-	-	-	-	-	-	-	-
Ab11	-1	0	0	0	A	T	G	K	G	S	.	T	.	C	.	.	T	G	G	G	-	-	A	.	R	G	G	C	.	T	-	-	-	-	-	-	-	-	-	-	-	-	-	-	-	-	-	-	-
Ab12	-1	0	0	0	-	-	-	.	T	.	.	-	.	.	.	.	.	.	.	.	-	.	.	.	.	.	.	.	.	.	-	-	-	-	-	-	-	-	-	-	-	-	-	-	-	-	-	-	-
Ab13	-1	0	0	0	W	S	G	G	G	G	.	T	.	C	.	.	.	R	R	C	-	-	.	.	R	.	T	G	.	W	-	-	-	-	-	-	-	-	-	-	-	-	-	-	-	-	-	-	-
Ab14	-1	0	0	0	K	-	-	T	T	.	A	A	.	G	M	K	M	M	A	Y	-	-	.	Y	.	R	W	.	.	A	-	-	-	-	-	-	-	-	-	-	-	-	-	-	-	-	-	-	-
G16	-1	0	0	0	-	-	-	.	T	.	.	-	.	.	.	.	.	.	.	.	-	.	.	.	.	.	.	.	.	Y	-	-	-	-	-	-	-	-	-	-	-	-	-	-	-	-	-	-	-
G17	-1	0	0	0	-	-	-	.	T	Y	.	-	.	.	.	.	.	.	M	.	-	.	.	.	.	.	.	R	.	.	-	-	-	-	-	-	-	-	-	-	-	-	-	-	-	-	-	-	-
Ab19	-1	0	0	0	-	-	-	.	T	.	.	-	.	.	.	.	.	.	.	.	-	.	.	.	.	.	.	.	.	.	-	-	-	-	-	-	-	-	-	-	-	-	-	-	-	-	-	-	-
Ab20	-1	0	0	0	-	-	-	.	T	.	.	-	Y	.	.	.	.	.	.	.	-	.	.	.	.	.	.	.	.	.	-	-	-	-	-	-	-	-	-	-	-	-	-	-	-	-	-	-	-
Ab21	-1	0	0	0	-	-	-	.	T	A	A	A	.	Y	.	.	.	.	.	.	-	.	.	.	.	.	.	.	.	.	-	-	-	-	-	-	-	-	-	-	-	-	-	-	-	-	-	-	-
B22	-1	0	0	0	-	-	-	.	T	.	K	-	.	.	.	.	.	.	Y	.	-	.	.	Y	.	.	M	.	.	S	G	-	-	-	-	-	-	-	-	-	-	-	-	-	-	-	-	-	-
B24	-1	0	0	0	-	-	-	-	-	-	A	-	.	.	.	.	.	.	.	.	-	.	.	.	.	.	.	.	.	.	-	-	-	-	-	-	-	-	-	-	-	-	-	-	-	-	-	-	-
B25	-1	0	0	0	-	-	-	.	T	.	.	-	.	.	.	.	.	.	.	.	-	.	.	.	.	.	.	.	.	.	-	-	-	-	-	-	-	-	-	-	-	-	-	-	-	-	-	-	-
B26	-1	0	0	0	-	-	-	.	T	.	.	-	.	.	.	.	.	.	.	.	-	.	.	.	.	.	.	.	.	.	-	-	-	-	-	-	-	-	-	-	-	-	-	-	-	-	-	-	-
B27	-1	0	0	0	-	-	-	.	T	.	.	-	.	.	.	.	.	.	.	.	-	.	.	.	.	.	.	.	.	.	-	-	-	-	-	-	-	-	-	-	-	-	-	-	-	-	-	-	-
B28	-1	0	0	0	-	-	-	.	T	.	.	-	.	.	.	.	.	.	.	.	-	.	.	.	.	.	.	.	.	.	-	-	-	-	-	-	-	-	-	-	-	-	-	-	-	-	-	-	-
B29	-1	0	0	0	-	-	A	.	T	T	.	-	.	.	.	.	.	.	.	.	-	.	.	.	.	.	.	.	.	.	-	-	-	-	-	-	-	-	-	-	-	-	-	-	-	-	-	-	-
B30	-1	0	0	0	-	-	-	.	T	Y	K	-	K	.	.	.	.	.	S	.	-	.	.	.	.	.	M	.	.	M	R	-	-	-	-	-	-	-	-	-	-	-	-	-	-	-	-	-	-
B32	-1	0	0	0	-	-	-	.	T	.	.	-	.	.	.	.	.	.	.	.	-	.	.	.	.	.	.	.	.	.	-	-	-	-	-	-	-	-	-	-	-	-	-	-	-	-	-	-	-
B33	-1	0	0	0	-	-	-	.	T	.	.	-	.	.	.	.	.	.	.	.	-	.	.	.	.	.	.	.	.	.	-	-	-	-	-	-	-	-	-	-	-	-	-	-	-	-	-	-	-
B34	-1	0	0	0	-	-	-	.	T	M	R	-	.	.	.	.	.	W	Y	.	-	.	.	.	.	T	.	R	M	.	-	-	-	-	-	-	-	-	-	-	-	-	-	-	-	-	-	-	-
B35	-1	0	0	0	-	-	-	.	T	.	R	-	Y	.	.	.	.	.	Y	.	-	.	.	.	.	.	Y	W	.	S	-	-	-	-	-	-	-	-	-	-	-	-	-	-	-	-	-	-	-
B36	-1	0	0	0	-	-	-	.	T	M	.	-	.	.	.	.	.	.	Y	.	-	.	.	.	.	.	.	.	W	S	-	-	-	-	-	-	-	-	-	-	-	-	-	-	-	-	-	-	-
B37	-1	0	0	0	-	-	-	.	T	.	.	-	.	.	.	.	.	.	.	.	-	.	.	.	.	.	.	.	.	.	-	-	-	-	-	-	-	-	-	-	-	-	-	-	-	-	-	-	-
B38	-1	0	0	0	-	-	-	.	T	M	.	-	.	.	.	.	.	.	.	.	-	.	.	.	.	.	.	.	M	.	-	-	-	-	-	-	-	-	-	-	-	-	-	-	-	-	-	-	-
B39	-1	0	0	0	A	-	A	.	.	A	R	-	.	.	.	.	.	.	.	.	-	.	K	M	.	.	Y	W	.	.	-	-	-	-	-	-	-	-	-	-	-	-	-	-	-	-	-	-	-
B41	-1	0	0	0	-	-	-	.	T	Y	.	-	.	.	.	.	.	.	.	.	-	.	.	.	.	.	.	.	W	Y	-	-	-	-	-	-	-	-	-	-	-	-	-	-	-	-	-	-	-
B42	-1	0	0	0	-	-	-	.	T	.	.	-	.	.	.	.	.	.	.	.	-	.	.	.	.	.	.	.	.	.	-	-	-	-	-	-	-	-	-	-	-	-	-	-	-	-	-	-	-
B43	-1	0	0	0	-	-	A	.	T	T	R	-	.	.	.	.	.	.	.	.	-	.	.	.	R	.	.	.	.	S	-	-	-	-	-	-	-	-	-	-	-	-	-	-	-	-	-	-	-
B44	-1	0	0	0	-	-	-	.	T	.	.	-	.	.	.	.	.	.	.	.	-	.	.	.	.	.	.	.	.	.	-	-	-	-	-	-	-	-	-	-	-	-	-	-	-	-	-	-	-
D48	-1	0	0	0	-	-	-	.	T	.	.	-	.	.	.	.	.	.	.	.	-	.	.	.	.	.	.	.	.	.	-	-	-	-	-	-	-	-	-	-	-	-	-	-	-	-	-	-	-
D49	-1	0	0	0	-	-	A	.	T	T	.	-	.	.	.	.	.	.	.	.	-	.	.	.	.	.	.	.	.	.	-	-	-	-	-	-	-	-	-	-	-	-	-	-	-	-	-	-	-
D50	-1	0	0	0	-	-	A	.	T	T	.	-	.	.	.	.	.	.	.	.	-	.	.	.	.	.	.	.	.	.	-	-	-	-	-	-	-	-	-	-	-	-	-	-	-	-	-	-	-
D51	-1	0	0	0	A	-	A	.	Y	M	K	-	R	.	.	.	.	.	.	.	-	.	.	.	.	.	A	.	.	M	-	-	-	-	-	-	-	-	-	-	-	-	-	-	-	-	-	-	-
D52	-1	0	0	0	-	-	A	.	T	T	.	-	.	.	.	.	.	.	.	.	-	.	.	.	.	.	.	.	.	.	-	-	-	-	-	-	-	-	-	-	-	-	-	-	-	-	-	-	-
D53	-1	0	0	0	-	-	-	.	T	.	.	-	.	.	.	.	.	.	.	.	-	.	.	.	.	.	.	.	.	.	-	-	-	-	-	-	-	-	-	-	-	-	-	-	-	-	-	-	-
D54	-1	0	0	0	-	-	-	.	T	.	.	-	.	.	.	.	.	.	.	.	-	.	.	.	.	.	.	.	.	.	-	-	-	-	-	-	-	-	-	-	-	-	-	-	-	-	-	-	-
D55	-1	0	0	0	A	T	G	T	G	.	.	T	.	C	.	.	.	G	A	C	-	-	.	.	G	.	T	G	.	T	-	-	-	-	-	-	-	-	-	-	-	-	-	-	-	-	-	-	-
D56	-1	0	0	0	A	-	A	.	T	.	.	-	W	A	W	.	.	.	Y	.	-	.	.	.	.	.	Y	.	W	S	-	-	-	-	-	-	-	-	-	-	-	-	-	-	-	-	-	-	-
E57	-1	0	0	0	-	-	A	.	T	T	.	-	.	.	.	.	.	.	.	.	-	.	.	.	.	.	.	.	.	.	-	-	-	-	-	-	-	-	-	-	-	-	-	-	-	-	-	-	-
E58	-1	0	0	0	-	-	A	.	T	T	.	-	.	.	.	.	.	.	.	.	-	.	.	.	.	.	.	.	.	.	-	-	-	-	-	-	-	-	-	-	-	-	-	-	-	-	-	-	-
F59	-1	0	0	0	C	C	R	.	C	A	C	-	.	G	.	.	C	.	M	.	G	.	Y	T	G	.	A	G	G	T	-	-	-	-	-	-	-	-	-	-	-	-	-	-	-	-	-	-	-
F60	-1	0	0	0	C	-	A	.	T	A	A	-	.	.	.	.	.	.	.	.	-	.	.	.	.	W	.	.	W	.	-	-	-	-	-	-	-	-	-	-	-	-	-	-	-	-	-	-	-
F61	-1	0	0	0	A	-	A	.	T	.	.	-	.	C	.	.	.	.	.	.	-	.	.	.	.	.	.	.	.	.	-	-	-	-	-	-	-	-	-	-	-	-	-	-	-	-	-	-	-
F62	-1	0	0	0	C	-	W	.	T	T	T	Y	Y	G	.	T	G	.	G	.	-	-	.	T	G	G	T	.	R	M	-	-	-	-	-	-	-	-	-	-	-	-	-	-	-	-	-	-	-
F63	-1	0	0	0	-	-	A	.	T	T	.	-	.	.	.	.	.	.	.	.	-	.	.	.	.	.	.	.	.	.	-	-	-	-	-	-	-	-	-	-	-	-	-	-	-	-	-	-	-
G64	-1	0	0	0	-	-	A	.	T	T	.	-	.	.	.	.	.	.	.	.	-	.	.	.	.	.	.	.	.	.	-	-	-	-	-	-	-	-	-	-	-	-	-	-	-	-	-	-	-
G65	-1	0	0	0	-	-	-	.	T	.	.	-	.	.	.	.	.	.	.	.	-	.	.	.	.	.	.	.	.	.	-	-	-	-	-	-	-	-	-	-	-	-	-	-	-	-	-	-	-
G66	-1	0	0	0	-	-	-	.	T	.	.	-	.	.	.	.	.	.	.	.	-	.	.	.	.	.	.	.	.	.	-	-	-	-	-	-	-	-	-	-	-	-	-	-	-	-	-	-	-
G67	-1	0	0	0	A	-	A	.	T	M	.	-	.	.	.	.	.	.	.	.	-	.	.	.	.	W	.	.	.	.	-	-	-	-	-	-	-	-	-	-	-	-	-	-	-	-	-	-	-
G68	-1	0	0	0	-	-	A	.	T	T	.	-	.	.	.	.	.	.	.	.	-	.	.	.	.	.	.	.	.	.	-	-	-	-	-	-	-	-	-	-	-	-	-	-	-	-	-	-	-
G69	-1	0	0	0	-	-	-	.	T	.	.	-	.	.	.	.	.	.	.	.	-	.	.	.	.	.	.	.	.	.	-	-	-	-	-	-	-	-	-	-	-	-	-	-	-	-	-	-	-
G70	-1	0	0	0	-	-	A	.	T	T	.	-	.	.	.	.	.	.	.	.	-	.	.	.	.	.	.	.	.	.	-	-	-	-	-	-	-	-	-	-	-	-	-	-	-	-	-	-	-
J74	-1	0	0	0	A	-	A	.	T	.	.	-	.	.	.	.	.	.	.	.	-	.	.	.	.	.	.	.	.	.	-	-	-	-	-	-	-	-	-	-	-	-	-	-	-	-	-	-	-
J76	-1	0	0	0	-	-	A	.	T	T	.	-	.	.	.	.	.	.	.	.	-	.	.	.	.	.	.	.	.	.	-	-	-	-	-	-	-	-	-	-	-	-	-	-	-	-	-	-	-
J77	-1	0	0	0	-	-	A	.	T	T	.	-	.	.	.	.	.	.	.	.	-	.	.	.	.	.	.	.	.	.	-	-	-	-	-	-	-	-	-	-	-	-	-	-	-	-	-	-	-
J78	-1	0	0	0	-	-	-	.	T	M	.	-	.	.	.	.	.	.	.	.	-	.	.	M	.	.	.	.	.	S	-	-	-	-	-	-	-	-	-	-	-	-	-	-	-	-	-	-	-
J79	-1	0	0	0	-	-	-	.	T	.	.	-	.	.	.	.	.	.	.	.	-	.	.	.	.	.	.	.	.	.	-	-	-	-	-	-	-	-	-	-	-	-	-	-	-	-	-	-	-
J80	-1	0	0	0	A	-	A	.	T	.	.	-	.	.	.	.	.	.	.	.	-	.	.	.	.	.	.	.	.	.	-	-	-	-	-	-	-	-	-	-	-	-	-	-	-	-	-	-	-
J81	-1	0	0	0	-	-	-	.	.	M	.	-	.	.	.	.	.	.	.	.	-	.	.	.	.	R	S	.	W	.	-	-	-	-	-	-	-	-	-	-	-	-	-	-	-	-	-	-	-
J82	-1	0	0	0	-	-	-	.	T	.	.	-	.	.	.	.	.	.	.	.	-	.	.	.	.	.	.	.	.	.	-	-	-	-	-	-	-	-	-	-	-	-	-	-	-	-	-	-	-
J83	-1	0	0	0	-	-	-	.	T	.	.	-	.	.	.	.	.	.	.	.	-	.	.	.	.	.	.	.	.	.	-	-	-	-	-	-	-	-	-	-	-	-	-	-	-	-	-	-	-
J84	-1	0	0	0	-	-	-	.	T	.	.	-	.	.	.	.	.	.	.	.	-	.	.	.	.	.	.	.	.	.	-	-	-	-	-	-	-	-	-	-	-	-	-	-	-	-	-	-	-
J85	-1	0	0	0	-	-	-	.	T	.	.	-	.	.	M	.	.	.	.	.	-	.	.	.	.	.	.	.	.	.	-	-	-	-	-	-	-	-	-	-	-	-	-	-	-	-	-	-	-
F86	-1	0	0	0	-	-	-	.	T	.	.	-	.	.	.	.	.	.	.	.	-	.	.	.	.	.	.	.	.	.	-	-	-	-	-	-	-	-	-	-	-	-	-	-	-	-	-	-	-
KU855474.1	-1	0	0	0	-	-	-	-	-	.	.	-	-	-	-	-	-	.	.	.	-	C	.	.	G	G	.	.	.	.	-	-	-	-	-	-	-	-	-	-	-	-	-	-	-	-	-	-	-
	5	5	5	5	5	5	5	5	5	5	5	5	5	5	5	5	5	5	5	5	5	5	5	5	5	5	5	5	5	5	5	5	5	5	5	5	5	5	5	5	5	5	5	5	5	5	5	5	5
	4	4	4	5	5	5	5	5	5	5	5	5	5	6	6	6	6	6	6	6	6	6	6	7	7	7	7	7	7	7	7	7	7	8	8	8	8	8	8	8	8	8	8	9	9	9	9	9	9
	7	8	9	0	1	2	3	4	5	6	7	8	9	0	1	2	3	4	5	6	7	8	9	0	1	2	3	4	5	6	7	8	9	0	1	2	3	4	5	6	7	8	9	0	1	2	3	4	5
Ab1	-1	0	0	0	-	-	A	G	A	A	C	G	C	A	G	C	-	-	-	-	A	C	T	T	C	G	G	A	A	C	G	G	A	T	T	T	C	-	-	-	-	-	-	C	G	G	T	C	T
Ab2	-1	0	0	0	-	-	.	R	.	.	.	.	.	.	K	.	-	-	G	A	.	A	.	G	.	.	A	T	.	.	.	T	.	A	.	G	T	-	-	-	-	-	-	G	A	A	.	-	.
Ab3	-1	0	0	0	-	-	.	C	.	.	.	.	.	.	A	.	-	-	-	-	.	.	.	-	.	.	.	.	.	.	.	.	.	.	A	.	.	-	-	-	-	-	-	T	C	.	G	T	C
Ab4	-1	0	0	0	-	-	.	A	.	.	.	.	.	.	A	A	-	-	C	A	R	A	-	-	-	-	-	-	-	-	-	-	-	-	-	-	-	-	-	-	-	-	-	-	-	-	-	-	-
Ab6	-1	0	0	0	-	-	.	.	.	.	.	.	.	.	.	.	-	-	-	-	.	A	.	G	A	A	.	.	.	.	.	C	.	G	C	A	-	-	-	-	-	-	-	-	-	-	-	-	-
Ab7	-1	0	0	0	-	-	.	.	.	.	Y	S	.	W	R	A	-	-	G	A	.	A	A	K	S	.	A	T	W	A	S	T	.	A	.	G	T	-	-	-	-	-	-	K	A	A	W	-	.
Ab8	-1	0	0	0	-	-	.	.	.	.	.	.	.	.	.	.	-	-	G	A	.	A	.	G	.	.	A	T	M	S	.	T	.	A	.	K	T	-	-	-	-	-	-	G	A	A	.	-	.
Ab9	-1	0	0	0	-	-	.	.	.	.	.	.	.	.	S	.	-	-	G	A	.	A	.	G	.	.	A	T	.	.	.	T	.	A	.	G	T	-	-	-	-	-	-	G	A	A	.	-	.
Ab10	-1	0	0	0	-	-	.	.	.	.	.	.	.	.	.	.	-	-	G	A	.	A	.	G	.	.	A	T	.	.	.	T	.	A	.	G	T	-	-	-	-	-	-	G	A	A	.	-	.
Ab11	-1	0	0	0	-	C	.	T	W	T	.	-	.	.	T	T	T	C	T	C	T	G	C	G	T	T	Y	T	T	.	A	T	C	G	A	.	K	C	C	G	-	-	-	G	A	A	C	.	A
Ab12	-1	0	0	0	-	-	.	.	.	.	.	.	.	.	.	.	-	-	G	A	.	A	.	G	.	.	A	T	.	.	.	T	.	A	.	G	T	-	-	-	-	-	-	G	A	A	.	-	.
Ab13	-1	0	0	0	-	C	W	W	W	T	.	S	.	W	T	T	T	C	S	T	T	K	C	G	T	T	T	T	T	.	W	T	C	R	A	K	K	Y	C	K	-	-	-	W	A	A	Y	.	A
Ab14	-1	0	0	0	-	-	.	.	.	.	T	K	.	.	S	T	-	-	G	A	.	A	G	S	A	.	A	T	T	T	.	T	.	M	.	G	T	T	C	R	A	T	C	G	A	T	C	T	.
G16	-1	0	0	0	-	-	.	.	.	.	.	.	.	.	.	.	-	-	G	A	.	A	.	G	.	.	A	T	.	Y	.	T	.	A	.	G	T	-	-	-	-	-	-	G	A	A	.	-	.
G17	-1	0	0	0	-	-	.	R	-	-	-	-	-	-	-	-	-	-	-	-	-	-	-	-	-	-	-	-	-	-	-	-	-	-	-	-	-	-	-	-	-	-	-	-	-	-	-	-	-
Ab19	-1	0	0	0	-	-	.	.	.	.	.	.	.	.	.	.	-	-	G	A	.	A	.	G	.	.	A	T	.	.	.	T	.	A	.	G	T	-	-	-	-	-	-	G	A	A	.	-	.
Ab20	-1	0	0	0	-	-	.	.	.	.	.	K	.	.	.	.	-	-	G	A	.	A	.	G	.	.	A	T	.	.	.	T	.	A	.	G	T	-	-	-	-	-	-	G	A	A	.	-	.
Ab21	-1	0	0	0	-	-	.	.	.	.	.	.	.	.	K	Y	-	-	G	A	.	A	.	G	.	.	A	T	.	M	.	Y	.	A	K	G	T	-	-	-	-	-	-	G	A	A	.	-	.
B22	-1	0	0	0	-	-	.	R	.	.	.	R	.	.	.	M	-	-	R	A	.	A	.	G	.	.	A	T	.	Y	.	T	.	A	W	R	T	-	-	-	-	-	-	G	A	A	W	-	.
B24	-1	0	0	0	-	-	.	.	.	.	.	.	.	.	.	.	-	-	G	A	.	A	.	G	.	.	A	T	.	.	.	T	.	A	.	G	T	-	-	-	-	-	-	G	A	A	.	-	.
B25	-1	0	0	0	-	-	.	.	.	.	.	.	.	.	.	.	-	-	G	A	.	A	.	G	.	.	A	T	.	.	.	T	.	A	.	G	T	-	-	-	-	-	-	G	A	A	.	-	.
B26	-1	0	0	0	-	-	.	.	.	.	.	.	.	.	.	.	-	-	G	A	.	A	.	G	.	.	A	T	.	.	.	T	.	A	.	G	T	-	-	-	-	-	-	G	A	A	.	-	.
B27	-1	0	0	0	-	-	.	.	.	.	.	.	.	.	.	.	-	-	G	A	.	A	.	G	.	.	A	T	.	.	.	T	.	A	.	G	T	-	-	-	-	-	-	G	A	A	.	-	.
B28	-1	0	0	0	-	-	.	.	.	.	.	.	.	.	R	.	-	-	G	A	.	A	.	G	.	.	A	T	.	.	.	T	.	A	.	G	T	-	-	-	-	-	-	G	A	A	.	-	.
B29	-1	0	0	0	-	-	.	.	.	.	.	.	.	.	.	.	-	-	G	A	.	A	.	G	.	.	A	T	.	.	.	T	.	A	.	G	T	-	-	-	-	-	-	G	A	A	.	-	.
B30	-1	0	0	0	-	-	.	R	.	.	M	.	.	.	C	A	C	A	G	A	.	A	K	G	M	.	A	T	.	Y	.	T	.	A	W	G	T	-	-	-	-	-	-	G	A	A	A	-	.
B32	-1	0	0	0	-	-	.	.	.	.	.	.	.	.	.	.	-	-	G	A	.	A	.	G	.	.	A	T	.	.	.	T	.	A	.	G	T	-	-	-	-	-	-	G	A	A	.	-	.
B33	-1	0	0	0	-	-	.	.	.	.	.	.	.	.	.	.	-	-	G	A	.	A	.	G	.	.	A	T	.	.	.	T	.	A	.	G	T	-	-	-	-	-	-	G	A	A	.	-	.
B34	-1	0	0	0	A	C	.	.	.	R	.	.	M	.	A	Y	-	-	G	A	.	A	.	G	.	.	A	.	.	Y	.	T	.	A	A	K	T	-	-	-	-	-	-	G	M	A	.	-	.
B35	-1	0	0	0	-	-	.	K	W	W	.	.	.	.	K	W	-	-	G	A	.	A	.	G	M	.	A	W	.	.	.	W	.	A	.	G	T	-	-	-	-	-	-	G	A	A	.	A	.
B36	-1	0	0	0	-	-	.	R	.	.	.	K	Y	.	.	A	-	-	R	A	.	A	.	G	.	.	A	T	.	M	R	Y	.	A	.	G	K	-	-	-	-	-	-	G	A	A	.	-	.
B37	-1	0	0	0	-	-	.	.	.	.	.	.	.	.	.	.	-	-	G	A	.	A	.	G	.	.	A	T	.	.	.	T	.	A	.	G	T	-	-	-	-	-	-	G	A	A	.	-	.
B38	-1	0	0	0	-	-	.	K	.	.	.	.	.	.	.	M	-	-	G	A	.	A	.	G	.	R	W	T	.	.	.	T	.	A	.	G	T	-	-	-	-	-	-	G	A	A	.	-	.
B39	-1	0	0	0	-	-	.	R	.	.	.	.	S	.	K	.	-	-	K	M	W	W	K	G	.	K	A	T	.	R	.	W	.	A	.	G	T	-	-	-	-	-	-	G	A	A	.	-	W
B41	-1	0	0	0	-	-	.	R	.	.	.	.	.	.	W	.	-	-	G	A	.	A	Y	R	S	.	A	T	.	M	K	T	.	A	W	G	T	-	-	-	-	-	-	G	A	A	.	-	.
B42	-1	0	0	0	-	-	.	.	.	.	.	.	.	.	.	.	-	-	G	A	.	A	.	G	.	.	A	T	.	.	.	T	.	A	.	G	T	-	-	-	-	-	-	G	A	A	.	-	.
B43	-1	0	0	0	-	-	.	.	.	.	M	R	M	W	.	.	-	-	G	A	.	A	.	G	.	R	A	T	R	M	.	W	.	W	.	G	T	-	-	-	-	-	-	G	A	A	.	-	W
B44	-1	0	0	0	-	-	.	.	.	.	.	.	.	.	.	.	-	-	G	A	.	A	.	G	.	.	A	T	.	.	.	T	.	A	.	G	T	-	-	-	-	-	-	G	A	A	.	-	.
D48	-1	0	0	0	-	-	.	.	.	.	.	.	.	.	.	.	-	-	G	A	.	A	.	G	.	.	A	T	.	.	.	T	.	A	.	G	T	-	-	-	-	-	-	G	A	A	.	-	.
D49	-1	0	0	0	-	-	.	.	.	.	.	.	.	.	.	M	-	-	G	A	.	A	.	G	.	.	A	T	.	.	.	T	.	A	.	G	T	-	-	-	-	-	-	G	A	A	.	-	.
D50	-1	0	0	0	-	-	.	.	.	.	.	.	.	.	.	.	-	-	G	A	.	A	.	G	.	.	A	T	.	.	.	T	.	A	.	G	T	-	-	-	-	-	-	G	A	A	.	-	.
D51	-1	0	0	0	-	-	.	.	.	.	M	S	.	W	.	M	-	-	R	A	W	A	.	S	.	M	A	T	R	A	A	W	.	W	.	G	K	-	-	-	-	-	-	R	A	A	.	-	.
D52	-1	0	0	0	-	-	.	.	.	.	.	.	.	.	.	.	-	-	G	A	.	A	.	G	.	.	A	T	.	.	.	T	.	A	.	G	T	-	-	-	-	-	-	G	A	A	.	-	.
D53	-1	0	0	0	-	-	.	.	.	.	.	.	Y	W	K	.	-	-	G	A	.	A	.	G	.	.	A	T	.	.	.	T	.	A	W	G	T	-	-	-	-	-	-	G	A	A	.	-	.
D54	-1	0	0	0	-	-	.	.	.	.	.	.	Y	W	K	.	-	-	G	A	.	A	.	G	.	.	A	T	.	.	.	T	.	A	W	G	T	-	-	-	-	-	-	G	A	A	.	-	.
D55	-1	0	0	0	-	C	G	T	.	T	.	.	.	.	T	T	T	C	G	M	W	R	C	G	T	T	C	T	T	.	A	T	C	G	A	.	G	C	C	G	-	-	-	G	A	A	C	.	A
D56	-1	0	0	0	-	-	.	.	.	.	.	K	.	.	R	Y	-	-	R	A	.	A	.	G	S	R	A	T	.	S	.	W	.	A	.	G	T	-	-	-	-	-	-	G	A	A	.	-	K
E57	-1	0	0	0	-	-	.	.	.	.	.	.	.	.	.	.	-	-	G	A	.	A	.	G	.	.	A	T	.	.	.	T	.	A	.	G	T	-	-	-	-	-	-	G	A	A	.	-	.
E58	-1	0	0	0	-	-	.	.	.	.	.	.	.	.	.	.	-	-	G	A	.	A	.	G	.	.	A	T	.	.	.	T	.	A	.	G	T	-	-	-	-	-	-	G	A	A	.	-	.
F59	-1	0	0	0	-	-	.	R	.	.	.	R	Y	R	K	S	-	-	G	A	.	A	.	G	.	.	A	W	.	.	.	T	.	A	.	G	T	-	-	-	-	-	-	G	A	A	.	-	.
F60	-1	0	0	0	-	-	.	.	.	.	.	.	.	.	.	.	-	-	G	A	.	A	.	G	.	.	A	T	.	A	T	T	.	A	.	G	T	-	-	-	-	-	-	G	A	A	.	-	.
F61	-1	0	0	0	-	-	.	.	.	.	.	.	.	.	.	.	-	-	G	A	.	A	.	G	.	.	A	T	.	.	.	T	.	A	.	G	T	-	-	-	-	-	-	G	A	A	.	-	.
F62	-1	0	0	0	A	T	T	.	K	T	T	.	.	.	.	T	A	G	G	R	G	A	.	.	-	-	A	Y	T	T	.	K	.	C	C	.	T	-	-	-	-	-	-	T	C	A	.	Y	.
F63	-1	0	0	0	-	-	.	.	.	.	.	.	.	.	.	.	-	-	G	A	.	A	.	G	.	.	A	T	.	.	.	T	.	A	.	G	T	-	-	-	-	-	-	G	A	A	.	-	.
G64	-1	0	0	0	-	-	.	.	.	.	.	.	.	.	.	.	-	-	G	A	.	A	.	G	.	.	A	T	.	.	.	T	.	A	.	G	T	-	-	-	-	-	-	G	A	A	.	-	.
G65	-1	0	0	0	-	-	.	.	.	.	.	.	.	.	.	.	-	-	G	A	.	A	.	G	.	.	A	T	.	.	.	T	.	A	.	G	T	-	-	-	-	-	-	G	A	A	.	-	.
G66	-1	0	0	0	-	-	.	.	.	.	.	.	.	.	.	.	-	-	G	A	.	A	.	G	.	.	A	T	.	.	.	T	.	A	.	G	T	-	-	-	-	-	-	G	A	A	.	-	.
G67	-1	0	0	0	-	-	.	A	.	.	.	R	.	.	S	M	-	-	G	A	.	A	.	G	.	.	A	T	.	.	.	W	.	A	.	G	K	-	-	-	-	-	-	G	A	A	.	-	.
G68	-1	0	0	0	-	-	.	.	.	.	.	.	.	.	.	.	-	-	G	A	.	A	.	G	.	.	A	T	.	.	.	T	.	A	.	G	T	-	-	-	-	-	-	G	A	A	.	-	.
G69	-1	0	0	0	-	-	.	.	.	.	.	.	.	.	.	.	-	-	G	A	.	A	.	G	.	.	A	T	.	.	.	T	.	A	.	G	T	-	-	-	-	-	-	G	A	A	.	-	.
G70	-1	0	0	0	-	-	.	.	.	.	.	S	.	.	.	.	-	-	G	A	.	A	.	G	.	.	A	T	.	.	.	W	.	W	.	G	T	-	-	-	-	-	-	G	A	A	.	-	.
J74	-1	0	0	0	-	-	.	.	.	.	.	R	.	.	.	.	-	-	G	A	.	A	.	G	.	.	A	T	.	.	.	T	.	A	.	G	T	-	-	-	-	-	-	G	A	A	.	-	.
J76	-1	0	0	0	-	-	.	.	.	.	.	.	.	.	.	.	-	-	G	A	.	A	.	G	.	.	A	T	.	.	.	T	.	A	.	G	T	-	-	-	-	-	-	G	A	A	.	-	.
J77	-1	0	0	0	-	-	.	.	.	.	.	.	.	.	.	.	-	-	G	A	.	A	.	G	.	.	A	T	.	.	.	T	.	A	.	G	T	-	-	-	-	-	-	G	A	A	.	-	.
J78	-1	0	0	0	-	-	.	K	.	.	.	.	.	.	.	K	-	-	A	A	.	A	.	K	.	S	A	T	.	.	.	T	.	A	.	G	T	-	-	-	-	-	-	G	A	A	.	-	.
J79	-1	0	0	0	-	-	.	S	.	.	.	.	.	.	.	.	-	-	G	A	.	A	.	G	.	.	A	T	.	.	.	T	.	A	.	G	T	-	-	-	-	-	-	G	A	A	.	-	.
J80	-1	0	0	0	-	-	.	.	.	.	.	.	.	.	.	.	-	-	G	A	.	A	.	G	.	.	A	T	.	.	.	T	.	A	.	G	T	-	-	-	-	-	-	G	A	A	.	-	.
J81	-1	0	0	0	-	-	.	.	.	.	.	.	.	.	.	.	-	-	G	A	.	A	.	G	.	.	A	T	.	.	.	T	.	A	W	G	T	-	-	-	-	-	-	G	M	A	.	-	W
J82	-1	0	0	0	-	-	.	.	.	.	.	.	.	.	.	.	-	-	G	A	.	A	.	G	.	.	A	T	.	.	.	T	.	A	.	G	T	-	-	-	-	-	-	G	A	A	.	-	.
J83	-1	0	0	0	-	-	.	.	.	.	.	.	.	.	.	.	-	-	G	A	.	A	.	G	.	.	A	T	.	.	.	T	.	A	.	G	T	-	-	-	-	-	-	G	A	A	.	-	.
J84	-1	0	0	0	-	-	.	.	.	.	.	.	.	.	.	.	-	-	G	A	.	A	.	G	.	.	A	T	.	.	.	T	.	A	.	G	T	-	-	-	-	-	-	G	A	A	.	-	.
J85	-1	0	0	0	-	-	.	.	.	.	.	.	.	.	.	.	-	-	G	A	.	A	.	G	.	.	A	T	.	.	.	T	.	A	.	G	T	-	-	-	-	-	-	G	A	A	.	-	.
F86	-1	0	0	0	-	-	.	.	.	.	.	.	.	.	.	.	-	-	G	A	.	A	.	G	.	.	A	T	.	.	.	T	.	A	.	G	T	-	-	-	-	-	-	G	A	A	.	-	.
KU855474.1	-1	0	0	0	-	-	.	.	.	.	.	.	T	.	.	.	-	-	G	A	.	A	.	G	.	.	A	T	.	.	T	T	G	G	.	G	T	-	-	-	-	-	-	G	A	A	.	-	.
	6	6	6	6	6	6	6	6	6	6	6	6	6	6	6	6	6	6	6	6	6	6	6	6	6	6	6	6	6	6	6	6	6	6	6	6	6	6	6	6	6	6	6	6	6	6	6	6	6
	2	2	2	2	2	3	3	3	3	3	3	3	3	3	3	4	4	4	4	4	4	4	4	4	4	5	5	5	5	5	5	5	5	5	5	6	6	6	6	6	6	6	6	6	6	7	7	7	7
	5	6	7	8	9	0	1	2	3	4	5	6	7	8	9	0	1	2	3	4	5	6	7	8	9	0	1	2	3	4	5	6	7	8	9	0	1	2	3	4	5	6	7	8	9	0	1	2	3
Ab1	-1	0	0	0	-	-	-	-	-	-	W	K	A	A	A	A	A	M	S	-	C	M	A	C	A	A	A	-	-	-	-	-	-	-	-	-	-	-	-	-	-	-	-	-	-	-	-	-	-
Ab2	-1	0	0	0	-	-	-	-	-	-	-	T	G	.	.	C	G	C	A	-	.	A	T	T	G	C	G	C	C	C	C	C	-	-	-	-	-	T	G	G	T	A	T	T	C	C	G	G	G
Ab3	-1	0	0	0	-	-	-	-	-	-	A	T	G	.	.	.	.	C	G	-	.	A	T	A	.	-	-	-	-	-	-	-	-	-	-	-	-	-	-	-	-	-	-	-	-	-	-	-	-
Ab4	-1	0	0	0	-	-	-	-	-	-	-	-	-	-	-	-	-	-	-	-	-	-	-	-	-	-	-	-	-	-	-	-	-	-	-	-	-	-	-	-	-	-	-	-	-	-	-	-	-
Ab6	-1	0	0	0	-	-	-	-	-	-	-	-	-	-	-	-	-	-	-	-	-	-	-	-	-	-	-	-	-	-	-	-	-	-	-	-	-	-	-	-	-	-	-	-	-	-	-	-	-
Ab7	-1	0	0	0	-	-	-	-	-	-	T	T	T	.	.	M	C	C	C	R	R	G	T	T	G	C	C	C	C	C	S	Y	-	-	-	-	-	C	G	G	T	A	T	T	Y	S	G	G	G
Ab8	-1	0	0	0	-	-	-	-	-	-	-	T	G	.	.	C	G	C	A	-	.	A	T	T	G	C	G	C	C	C	C	C	-	-	-	-	-	T	G	G	T	A	T	T	C	S	G	G	G
Ab9	-1	0	0	0	-	-	-	-	-	-	-	T	G	.	.	C	G	C	A	-	.	A	T	T	G	C	G	C	C	C	C	C	-	-	-	-	-	T	G	G	T	A	T	T	C	C	G	G	G
Ab10	-1	0	0	0	-	-	-	-	-	-	-	T	G	.	.	C	G	C	A	-	.	A	T	T	G	C	G	C	C	C	C	C	-	-	-	-	-	T	G	G	T	A	T	T	C	C	G	G	G
Ab11	-1	0	0	0	T	G	-	T	A	T	C	G	G	T	.	M	T	C	A	-	G	.	C	T	G	C	.	A	C	C	T	T	-	C	A	G	A	C	A	G	T	G	T	T	C	M	T	G	G
Ab12	-1	0	0	0	-	-	-	-	-	-	-	T	G	.	.	C	G	C	A	-	.	A	T	T	G	C	G	C	C	C	C	C	-	-	-	-	-	T	G	G	T	A	T	T	C	C	G	G	G
Ab13	-1	0	0	0	T	W	-	T	A	T	Y	G	R	W	W	Y	T	C	M	-	W	A	M	T	G	S	R	A	C	C	T	T	T	C	A	G	A	M	A	G	S	G	K	Y	C	R	T	G	G
Ab14	-1	0	0	0	C	A	G	W	C	T	K	.	W	.	W	C	R	C	G	-	.	A	T	T	G	C	G	C	A	C	T	Y	Y	-	-	-	-	T	G	G	Y	A	T	T	M	C	G	S	G
G16	-1	0	0	0	-	-	-	-	-	-	-	T	G	.	W	C	G	C	A	-	.	A	T	T	G	C	G	C	C	C	C	M	-	-	-	-	-	T	G	G	T	A	T	T	C	C	G	G	G
G17	-1	0	0	0	-	-	-	-	-	-	-	T	G	.	.	M	S	Y	C	-	.	A	T	T	G	C	Y	C	C	C	C	C	-	-	-	-	-	T	G	G	T	A	T	T	C	C	G	G	G
Ab19	-1	0	0	0	-	-	-	-	-	-	-	T	G	.	.	C	G	C	A	-	.	A	T	T	G	C	G	C	C	C	C	C	-	-	-	-	-	T	G	G	T	A	T	T	C	C	G	G	G
Ab20	-1	0	0	0	-	-	-	-	-	-	-	T	G	.	.	C	G	C	A	-	.	A	T	T	G	C	G	C	C	C	C	C	-	-	-	-	-	T	G	G	T	A	T	T	C	C	G	G	G
Ab21	-1	0	0	0	-	-	-	-	-	-	-	T	G	.	.	C	G	C	A	-	.	R	T	T	G	C	G	C	C	C	S	C	-	-	-	-	-	W	R	K	T	A	T	T	C	Y	G	G	K
B22	-1	0	0	0	-	-	-	-	-	-	-	W	R	.	.	C	G	C	A	-	.	W	T	T	G	C	G	C	C	C	C	C	-	-	-	-	-	T	G	G	K	A	T	T	Y	Y	G	G	G
B24	-1	0	0	0	-	-	-	-	-	-	-	T	G	.	.	C	G	C	A	-	.	A	T	T	G	C	G	C	C	C	C	C	-	-	-	-	-	T	G	G	T	A	T	T	C	C	G	G	G
B25	-1	0	0	0	-	-	-	-	-	-	-	T	G	.	.	C	G	C	A	-	.	A	T	T	G	C	G	C	C	C	C	C	-	-	-	-	-	T	G	G	T	A	T	T	C	C	G	G	G
B26	-1	0	0	0	-	-	-	-	-	-	-	T	G	.	.	C	G	C	A	-	.	A	T	T	G	C	G	C	C	C	C	C	-	-	-	-	-	T	G	G	T	A	T	T	C	C	G	G	G
B27	-1	0	0	0	-	-	-	-	-	-	-	T	G	.	.	C	G	C	A	-	.	A	T	T	G	C	G	C	C	C	C	C	-	-	-	-	-	T	G	G	T	A	T	T	C	C	G	G	G
B28	-1	0	0	0	-	-	-	-	-	-	-	T	G	.	.	C	G	C	A	-	.	A	T	T	G	C	G	C	C	C	C	C	-	-	-	-	-	T	G	G	T	A	T	T	C	C	G	G	G
B29	-1	0	0	0	-	-	-	-	-	-	-	T	G	.	.	C	G	C	A	-	.	A	T	T	G	C	G	C	C	C	T	C	-	-	-	-	-	T	G	G	T	A	T	T	C	C	G	G	G
B30	-1	0	0	0	-	-	-	-	-	-	-	T	G	.	W	C	K	C	M	-	.	A	Y	Y	S	C	S	C	C	C	C	C	-	-	-	-	-	Y	G	G	T	R	T	W	S	C	G	G	G
B32	-1	0	0	0	-	-	-	-	-	-	-	T	G	.	.	C	G	C	A	-	.	A	T	T	G	C	G	C	C	C	C	C	-	-	-	-	-	T	G	G	T	A	T	T	C	C	G	G	G
B33	-1	0	0	0	-	-	-	-	-	-	-	T	G	.	.	C	G	C	A	-	.	A	T	T	G	C	G	C	C	C	C	C	-	-	-	-	-	T	G	G	T	A	T	T	C	C	G	G	G
B34	-1	0	0	0	-	-	-	-	-	-	-	.	K	.	W	Y	S	C	M	-	.	R	T	Y	G	Y	T	C	C	C	C	C	-	-	-	-	-	Y	S	G	T	A	T	T	S	C	K	G	G
B35	-1	0	0	0	-	-	-	-	-	-	-	W	S	.	.	Y	K	C	A	-	.	A	T	T	K	Y	K	C	C	C	C	C	-	-	-	-	-	T	G	K	K	A	T	T	C	C	G	G	G
B36	-1	0	0	0	-	-	-	-	-	-	-	T	K	.	.	C	K	C	W	-	.	A	T	T	G	C	G	C	C	C	C	C	-	-	-	-	-	T	G	G	T	A	T	T	C	C	G	G	G
B37	-1	0	0	0	-	-	-	-	-	-	-	T	G	.	.	C	G	C	A	-	.	A	T	T	G	C	G	C	C	C	C	C	-	-	-	-	-	T	G	G	T	A	T	T	C	C	G	G	G
B38	-1	0	0	0	-	-	-	-	-	-	-	T	G	.	.	C	G	C	A	-	.	A	Y	T	G	C	G	C	C	C	C	C	-	-	-	-	-	T	G	G	T	A	T	T	C	C	G	G	G
B39	-1	0	0	0	-	-	-	-	-	-	-	T	R	.	W	Y	G	C	A	A	M	A	T	T	G	C	G	C	C	C	T	C	C	-	-	-	-	T	S	R	T	W	Y	T	S	S	G	G	G
B41	-1	0	0	0	-	-	-	-	-	-	-	T	G	.	.	C	G	C	A	-	.	A	T	T	S	C	S	C	C	C	C	Y	-	-	-	-	-	T	G	G	T	A	T	T	C	S	G	G	G
B42	-1	0	0	0	-	-	-	-	-	-	-	T	G	.	.	C	G	C	A	-	.	A	T	T	G	C	G	C	C	C	C	C	-	-	-	-	-	T	G	G	T	A	T	T	C	C	G	G	G
B43	-1	0	0	0	-	-	-	-	-	-	-	W	S	.	W	C	G	C	A	-	.	A	T	Y	G	C	S	C	C	C	T	C	-	-	-	-	-	T	G	G	K	R	K	K	G	C	G	K	G
B44	-1	0	0	0	-	-	-	-	-	-	-	T	G	.	.	C	G	C	A	-	.	A	T	T	G	C	G	C	C	C	C	C	-	-	-	-	-	T	G	G	T	A	T	T	C	C	G	G	G
D48	-1	0	0	0	-	-	-	-	-	-	-	T	G	.	.	C	G	C	A	-	.	A	T	T	G	C	G	C	C	C	C	C	-	-	-	-	-	T	G	G	T	A	T	T	C	C	G	G	G
D49	-1	0	0	0	-	-	-	-	-	-	-	T	G	.	.	C	G	C	A	-	.	A	T	T	G	C	G	C	C	C	T	C	-	-	-	-	-	T	G	G	T	A	T	T	C	C	G	G	G
D50	-1	0	0	0	-	-	-	-	-	-	-	T	G	.	.	C	G	C	A	-	.	A	T	T	G	C	G	C	C	C	T	C	-	-	-	-	-	T	G	G	T	A	T	T	C	C	G	G	G
D51	-1	0	0	0	-	-	-	-	-	-	-	T	R	W	R	C	R	Y	M	-	.	A	Y	Y	G	S	S	C	C	C	Y	Y	-	-	-	-	-	T	G	G	Y	A	Y	T	C	C	G	G	G
D52	-1	0	0	0	-	-	-	-	-	-	-	T	G	.	.	C	G	C	A	-	.	A	T	T	G	C	G	C	C	C	T	C	-	-	-	-	-	T	G	G	T	A	T	T	C	C	G	G	G
D53	-1	0	0	0	-	-	-	-	-	-	-	T	G	.	.	C	G	C	A	-	.	A	T	T	G	C	S	C	C	C	C	C	-	-	-	-	-	T	G	G	T	A	T	T	C	C	G	G	G
D54	-1	0	0	0	-	-	-	-	-	-	-	T	G	.	.	C	G	C	A	-	.	A	T	T	G	C	S	C	C	C	C	C	-	-	-	-	-	T	G	G	T	A	T	T	C	C	G	G	G
D55	-1	0	0	0	T	G	-	T	W	T	C	G	G	Y	.	C	T	C	A	-	G	A	C	T	G	C	.	A	C	C	T	T	-	C	A	G	A	C	A	G	K	G	T	T	C	A	T	G	G
D56	-1	0	0	0	-	-	-	-	-	-	-	T	G	.	.	C	S	.	M	-	.	A	T	T	G	C	M	M	C	C	T	Y	-	-	-	-	-	K	G	G	W	A	T	T	C	C	S	G	G
E57	-1	0	0	0	-	-	-	-	-	-	-	T	G	.	.	C	G	C	A	-	.	A	T	T	G	C	G	C	C	C	T	C	-	-	-	-	-	T	G	G	T	A	T	T	C	C	G	G	G
E58	-1	0	0	0	-	-	-	-	-	-	-	T	G	.	.	C	G	C	A	-	.	A	T	T	G	C	G	C	C	C	T	C	-	-	-	-	-	T	G	G	T	A	T	T	C	C	G	G	G
F59	-1	0	0	0	-	-	-	-	-	-	-	T	G	.	.	Y	K	C	A	-	.	A	T	T	G	C	G	C	C	C	T	C	-	-	-	-	-	T	G	G	T	A	T	K	C	C	G	G	G
F60	-1	0	0	0	-	-	-	-	-	-	-	T	G	.	.	C	G	C	A	-	.	A	T	T	G	C	G	C	C	C	C	C	-	-	-	-	-	T	G	G	T	A	T	T	C	C	G	G	G
F61	-1	0	0	0	-	-	-	-	-	-	-	T	G	.	.	C	G	C	A	-	.	A	T	T	G	C	G	C	C	C	T	C	-	-	-	-	-	T	G	G	T	A	T	T	C	C	G	G	G
F62	-1	0	0	0	-	-	-	-	-	-	-	T	T	T	M	T	T	C	A	-	S	C	C	.	G	C	G	C	A	T	T	C	G	G	-	-	-	T	G	A	A	G	T	T	G	T	T	G	T
F63	-1	0	0	0	-	-	-	-	-	-	-	T	G	.	.	C	G	C	A	-	.	A	T	T	G	C	G	C	C	C	T	C	-	-	-	-	-	T	G	G	T	A	T	T	C	C	G	G	G
G64	-1	0	0	0	-	-	-	-	-	-	-	T	G	.	.	C	G	C	A	-	.	A	T	T	G	C	G	C	C	C	T	C	-	-	-	-	-	T	G	G	T	A	T	T	C	C	G	G	G
G65	-1	0	0	0	-	-	-	-	-	-	-	T	G	.	.	C	G	C	A	-	.	A	T	T	G	C	G	C	C	C	C	C	-	-	-	-	-	T	G	G	T	A	T	T	Y	C	G	G	G
G66	-1	0	0	0	-	-	-	-	-	-	-	T	G	.	.	C	G	C	A	-	.	A	T	T	G	C	G	C	C	C	C	C	-	-	-	-	-	T	G	G	T	A	T	T	C	C	G	G	G
G67	-1	0	0	0	-	-	-	-	-	-	-	T	G	.	.	C	G	C	M	-	.	W	T	T	G	C	G	C	C	C	Y	C	-	-	-	-	-	T	G	G	T	A	T	T	C	C	G	G	G
G68	-1	0	0	0	-	-	-	-	-	-	-	T	G	.	.	C	G	C	A	-	.	A	T	T	G	C	G	C	C	C	T	C	-	-	-	-	-	T	G	G	T	A	T	T	C	C	G	G	G
G69	-1	0	0	0	-	-	-	-	-	-	-	T	G	.	.	C	G	C	A	-	.	A	T	T	G	C	G	C	C	C	C	C	-	-	-	-	-	T	G	G	T	A	T	T	C	C	G	G	G
G70	-1	0	0	0	-	-	-	-	-	-	-	T	S	.	.	C	G	C	A	-	.	A	T	T	G	C	G	C	C	C	T	C	-	-	-	-	-	T	G	G	K	A	T	T	C	C	G	G	G
J74	-1	0	0	0	-	-	-	-	-	-	-	T	G	.	.	C	G	C	A	-	.	A	T	T	G	C	G	C	C	C	T	C	-	-	-	-	-	T	G	G	T	A	T	T	C	C	G	G	G
J76	-1	0	0	0	-	-	-	-	-	-	-	T	G	.	.	C	G	C	A	-	.	A	T	T	G	C	G	C	C	C	T	C	-	-	-	-	-	T	G	G	T	A	T	T	C	C	G	G	G
J77	-1	0	0	0	-	-	-	-	-	-	-	T	G	.	.	C	G	C	A	-	.	A	T	T	G	C	G	C	C	C	T	C	-	-	-	-	-	T	G	G	T	A	T	T	C	C	G	G	G
J78	-1	0	0	0	-	-	-	-	-	-	-	T	G	.	.	C	G	C	A	-	.	A	T	T	G	C	S	C	C	C	C	C	-	-	-	-	-	T	G	G	T	A	T	T	C	C	G	G	G
J79	-1	0	0	0	-	-	-	-	-	-	-	T	G	.	.	C	G	C	A	-	.	A	T	T	G	C	G	C	C	C	C	C	-	-	-	-	-	T	G	G	T	A	T	T	C	C	G	G	G
J80	-1	0	0	0	-	-	-	-	-	-	-	T	G	.	.	C	G	C	A	-	.	A	T	T	G	C	G	C	C	C	T	C	-	-	-	-	-	T	G	G	T	A	T	T	C	C	G	G	G
J81	-1	0	0	0	-	-	-	-	-	-	-	T	G	.	M	M	G	C	A	-	.	A	T	T	G	C	G	C	C	C	C	M	-	-	-	-	-	T	G	G	T	A	T	T	C	S	G	G	G
J82	-1	0	0	0	-	-	-	-	-	-	-	T	G	.	.	C	G	C	A	-	.	A	T	T	G	C	G	C	C	C	C	C	-	-	-	-	-	T	G	G	T	A	T	T	C	C	G	G	G
J83	-1	0	0	0	-	-	-	-	-	-	-	T	G	.	.	C	G	C	A	-	.	A	T	T	G	C	G	C	C	C	C	C	-	-	-	-	-	T	G	G	T	A	T	T	C	C	G	G	G
J84	-1	0	0	0	-	-	-	-	-	-	-	T	G	.	.	C	G	C	A	-	.	A	T	T	G	C	G	C	C	C	C	C	-	-	-	-	-	T	G	G	T	A	T	T	C	C	G	G	G
J85	-1	0	0	0	-	-	-	-	-	-	-	T	G	.	.	C	G	C	A	-	.	A	T	T	G	C	G	C	C	C	C	C	-	-	-	-	-	T	G	G	T	A	T	T	C	C	G	G	G
F86	-1	0	0	0	-	-	-	-	-	-	-	T	G	.	.	C	G	C	A	-	.	A	T	T	G	C	G	C	C	C	C	C	-	-	-	-	-	T	G	G	T	A	T	T	C	C	G	G	G
KU855474.1	-1	0	0	0	-	-	-	-	-	-	-	T	G	.	.	C	G	C	A	-	A	G	T	T	G	C	G	C	C	C	G	A	-	-	-	-	-	-	A	G	C	C	A	T	C	C	G	G	C
	7	7	7	7	7	7	7	7	7	7	7	7	7	7	7	7	7	7	7	7	7	7	7	7	7	7	7	7	7	7	7	7	7	7	7	7	7	7	7	7	7	7	7	7	7	7	7	7	7
	0	0	0	0	0	0	0	1	1	1	1	1	1	1	1	1	1	2	2	2	2	2	2	2	2	2	2	3	3	3	3	3	3	3	3	3	3	4	4	4	4	4	4	4	4	4	4	5	5
	3	4	5	6	7	8	9	0	1	2	3	4	5	6	7	8	9	0	1	2	3	4	5	6	7	8	9	0	1	2	3	4	5	6	7	8	9	0	1	2	3	4	5	6	7	8	9	0	1
Ab1	-1	0	0	0	-	-	-	-	-	-	-	-	-	-	-	-	-	-	-	-	-	-	-	-	-	-	-	-	-	-	-	-	-	-	-	-	-	-	-	-	-	-	-	-	-	-	-	-	-
Ab2	-1	0	0	0	-	-	-	-	-	-	-	-	-	-	-	-	-	-	-	C	C	G	A	R	C	G	T	C	-	-	-	-	-	-	-	-	-	-	-	-	-	-	-	A	T	T	G	C	T
Ab3	-1	0	0	0	-	-	-	-	-	-	-	-	-	-	-	-	-	-	-	-	-	-	-	-	-	-	-	-	-	-	-	-	-	-	-	-	-	-	-	-	-	-	-	-	-	-	-	-	-
Ab4	-1	0	0	0	-	-	-	-	-	-	-	-	-	-	-	-	-	-	-	-	-	-	-	-	-	-	-	-	-	-	-	-	-	-	-	-	-	-	-	-	-	-	-	-	-	-	-	-	-
Ab6	-1	0	0	0	-	-	-	-	-	-	-	-	-	-	-	-	-	-	-	-	-	-	-	-	-	-	-	-	-	-	-	-	-	-	-	-	-	-	-	-	-	-	-	-	-	-	-	-	-
Ab7	-1	0	0	0	-	-	-	-	-	-	-	-	-	-	-	-	-	-	-	T	Y	R	A	A	M	G	T	K	-	-	-	-	-	-	-	-	-	-	-	-	-	-	-	A	T	T	G	S	T
Ab8	-1	0	0	0	-	-	-	-	-	-	-	-	-	-	-	-	-	-	-	C	C	G	A	G	C	G	T	C	-	-	-	-	-	-	-	-	-	-	-	-	-	-	-	A	T	T	G	C	T
Ab9	-1	0	0	0	-	-	-	-	-	-	-	-	-	-	-	-	-	-	-	C	C	G	A	G	C	G	T	C	-	-	-	-	-	-	-	-	-	-	-	-	-	-	-	A	T	T	G	C	T
Ab10	-1	0	0	0	-	-	-	-	-	-	-	-	-	-	-	-	-	-	-	C	C	G	A	G	C	G	T	C	-	-	-	-	-	-	-	-	-	-	-	-	-	-	-	A	T	T	G	C	T
Ab11	-1	0	0	0	-	-	-	-	-	-	-	-	-	-	-	-	-	-	C	C	C	G	G	G	G	G	-	C	A	G	G	-	-	-	-	A	A	A	G	C	C	C	C	C	C	G	G	S	G
Ab12	-1	0	0	0	-	-	-	-	-	-	-	-	-	-	-	-	-	-	-	C	C	G	A	G	C	G	T	C	-	-	-	-	-	-	-	-	-	-	-	-	-	-	-	A	T	T	G	C	T
Ab13	-1	0	0	0	-	-	-	-	-	-	-	-	-	-	-	-	-	-	S	C	C	G	G	G	G	G	G	S	A	G	G	-	-	-	-	G	A	A	S	C	C	C	C	C	C	S	R	S	G
Ab14	-1	0	0	0	-	-	-	-	-	-	-	-	-	-	-	-	-	-	-	C	M	M	A	Y	C	G	W	M	-	-	-	-	-	-	-	-	-	-	-	-	-	-	-	M	T	T	R	C	W
G16	-1	0	0	0	-	-	-	-	-	-	-	-	-	-	-	-	-	-	-	C	C	G	A	G	C	G	T	C	-	-	-	-	-	-	-	-	-	-	-	-	-	-	-	A	T	W	G	C	T
G17	-1	0	0	0	-	-	-	-	-	-	-	-	-	-	-	-	-	-	-	-	-	-	-	-	-	-	-	-	-	-	-	-	-	-	-	-	-	-	-	-	-	-	C	A	T	T	G	M	T
Ab19	-1	0	0	0	-	-	-	-	-	-	-	-	-	-	-	-	-	-	-	C	C	G	A	G	C	G	T	C	-	-	-	-	-	-	-	-	-	-	-	-	-	-	-	A	T	T	G	C	T
Ab20	-1	0	0	0	-	-	-	-	-	-	-	-	-	-	-	-	-	-	-	C	C	R	A	G	C	G	T	C	-	-	-	-	-	-	-	-	-	-	-	-	-	-	-	A	T	T	G	C	T
Ab21	-1	0	0	0	A	C	A	A	C	C	C	T	C	G	A	G	C	C	C	C	C	G	R	G	G	G	T	G	G	C	C	T	T	G	G	G	G	A	T	C	G	T	C	A	T	T	G	C	T
B22	-1	0	0	0	-	-	-	-	-	-	-	-	-	-	-	-	-	-	-	S	Y	S	A	G	M	G	T	C	-	-	-	-	-	-	-	-	-	-	-	-	-	-	-	A	T	T	K	Y	T
B24	-1	0	0	0	-	-	-	-	-	-	-	-	-	-	-	-	-	-	-	C	C	G	A	G	C	G	T	C	-	-	-	-	-	-	-	-	-	-	-	-	-	-	-	A	T	T	G	C	T
B25	-1	0	0	0	-	-	-	-	-	-	-	-	-	-	-	-	-	-	-	C	C	G	A	G	C	G	T	C	-	-	-	-	-	-	-	-	-	-	-	-	-	-	-	A	T	T	G	C	T
B26	-1	0	0	0	-	-	-	-	-	-	-	-	-	-	-	-	-	-	-	C	C	G	A	G	C	G	T	C	-	-	-	-	-	-	-	-	-	-	-	-	-	-	-	A	T	T	G	C	T
B27	-1	0	0	0	-	-	-	-	-	-	-	-	-	-	-	-	-	-	-	C	C	G	A	G	C	G	T	C	-	-	-	-	-	-	-	-	-	-	-	-	-	-	-	A	T	T	G	C	T
B28	-1	0	0	0	-	-	-	-	-	-	-	-	-	-	-	-	-	-	-	C	C	G	A	G	C	G	T	C	-	-	-	-	-	-	-	-	-	-	-	-	-	-	-	A	T	T	G	C	T
B29	-1	0	0	0	-	-	-	-	-	-	-	-	-	-	-	-	-	-	-	C	C	G	A	G	C	G	T	C	-	-	-	-	-	-	-	-	-	-	-	-	-	-	-	A	T	T	G	C	T
B30	-1	0	0	0	-	-	-	-	-	-	-	-	-	-	-	-	-	-	-	Y	Y	G	A	G	M	G	Y	C	-	-	-	-	-	-	-	-	-	-	-	-	-	-	-	W	T	T	G	Y	Y
B32	-1	0	0	0	-	-	-	-	-	-	-	-	-	-	-	-	-	-	-	C	C	G	A	G	C	G	T	C	-	-	-	-	-	-	-	-	-	-	-	-	-	-	-	A	T	T	G	C	T
B33	-1	0	0	0	-	-	-	-	-	-	-	-	-	-	-	-	-	-	-	C	C	G	A	G	C	G	T	C	-	-	-	-	-	-	-	-	-	-	-	-	-	-	-	A	T	T	G	C	T
B34	-1	0	0	0	-	-	-	-	-	-	-	-	-	-	-	-	-	-	-	S	C	K	A	G	C	S	T	C	-	-	-	-	-	-	-	-	-	-	-	-	-	-	-	A	T	K	K	C	T
B35	-1	0	0	0	-	-	-	-	-	-	-	-	-	-	-	-	-	-	-	G	S	C	A	T	S	G	T	C	-	-	-	-	-	-	-	-	-	-	-	-	-	-	-	A	T	T	S	C	T
B36	-1	0	0	0	-	-	-	-	-	-	-	-	-	-	-	-	-	-	-	C	C	G	A	G	C	G	T	C	-	-	-	-	-	-	-	-	-	-	-	-	-	-	-	A	T	T	G	C	T
B37	-1	0	0	0	-	-	-	-	-	-	-	-	-	-	-	-	-	-	-	C	C	G	A	G	C	G	T	C	-	-	-	-	-	-	-	-	-	-	-	-	-	-	-	A	T	T	G	C	T
B38	-1	0	0	0	-	-	-	-	-	-	-	-	-	-	-	-	-	-	-	C	C	G	A	S	C	G	T	C	-	-	-	-	-	-	-	-	-	-	-	-	-	-	-	A	T	T	G	C	T
B39	-1	0	0	0	-	-	-	-	-	-	-	-	-	-	-	-	-	-	C	C	C	G	G	G	A	G	C	C	C	C	C	-	-	G	G	K	C	M	T	G	G	S	G	A	T	G	S	K	G
B41	-1	0	0	0	-	-	-	-	-	-	-	-	-	-	-	-	-	-	-	M	C	G	A	G	Y	G	T	C	-	-	-	-	-	-	-	-	-	-	-	-	-	-	-	A	T	W	G	C	T
B42	-1	0	0	0	-	-	-	-	-	-	-	-	-	-	-	-	-	-	-	C	C	G	A	G	C	G	T	C	-	-	-	-	-	-	-	-	-	-	-	-	-	-	-	A	T	T	G	C	T
B43	-1	0	0	0	-	-	-	-	-	-	-	-	-	-	-	-	-	-	-	C	C	R	A	K	S	G	T	S	-	-	-	-	-	-	-	-	-	-	-	-	-	-	-	A	T	T	G	C	T
B44	-1	0	0	0	-	-	-	-	-	-	-	-	-	-	-	-	-	-	-	C	C	G	A	G	C	G	T	C	-	-	-	-	-	-	-	-	-	-	-	-	-	-	-	A	T	T	G	C	T
D48	-1	0	0	0	-	-	-	-	-	-	-	-	-	-	-	-	-	-	-	C	C	G	A	G	C	G	T	C	-	-	-	-	-	-	-	-	-	-	-	-	-	-	-	A	T	T	G	C	T
D49	-1	0	0	0	-	-	-	-	-	-	-	-	-	-	-	-	-	-	-	C	C	G	A	G	C	G	T	C	-	-	-	-	-	-	-	-	-	-	-	-	-	-	-	A	T	T	G	C	T
D50	-1	0	0	0	-	-	-	-	-	-	-	-	-	-	-	-	-	-	-	C	C	G	A	G	C	G	T	C	-	-	-	-	-	-	-	-	-	-	-	-	-	-	-	A	T	T	G	C	T
D51	-1	0	0	0	-	-	-	-	-	-	-	-	-	-	-	-	-	-	-	S	S	G	A	G	Y	G	T	C	-	-	-	-	-	-	-	-	-	-	-	-	-	-	-	A	T	T	G	Y	T
D52	-1	0	0	0	-	-	-	-	-	-	-	-	-	-	-	-	-	-	-	C	C	G	A	G	C	G	T	C	-	-	-	-	-	-	-	-	-	-	-	-	-	-	-	A	T	T	G	C	T
D53	-1	0	0	0	-	-	-	-	-	-	-	-	-	-	-	-	-	-	-	C	C	G	A	G	C	G	T	C	-	-	-	-	-	-	-	-	-	-	-	-	-	-	-	A	T	T	G	C	T
D54	-1	0	0	0	-	-	-	-	-	-	-	-	-	-	-	-	-	-	-	C	C	G	A	G	C	G	T	C	-	-	-	-	-	-	-	-	-	-	-	-	-	-	-	A	T	T	G	C	T
D55	-1	0	0	0	-	-	-	-	-	-	-	-	-	-	-	-	-	-	C	C	C	G	G	G	G	G	-	C	A	G	G	-	-	-	-	G	A	A	R	C	C	C	C	C	C	G	G	C	G
D56	-1	0	0	0	-	-	-	-	-	-	-	-	-	-	-	-	-	-	-	S	S	G	A	R	K	G	T	C	-	-	-	-	-	-	-	-	-	-	-	-	-	-	-	A	T	T	G	C	T
E57	-1	0	0	0	-	-	-	-	-	-	-	-	-	-	-	-	-	-	-	C	C	G	A	G	C	G	T	C	-	-	-	-	-	-	-	-	-	-	-	-	-	-	-	A	T	T	G	C	T
E58	-1	0	0	0	-	-	-	-	-	-	-	-	-	-	-	-	-	-	-	C	C	G	A	G	C	G	T	C	-	-	-	-	-	-	-	-	-	-	-	-	-	-	-	A	T	T	G	C	T
F59	-1	0	0	0	-	-	-	-	-	-	-	-	-	-	-	-	-	-	-	C	C	R	A	K	C	G	T	C	-	-	-	-	-	-	-	-	-	-	-	-	-	-	-	A	T	T	G	C	T
F60	-1	0	0	0	-	-	-	-	-	-	-	-	-	-	-	-	-	-	-	C	C	G	A	K	C	G	T	C	-	-	-	-	-	-	-	-	-	-	-	-	-	-	-	A	T	T	G	C	T
F61	-1	0	0	0	-	-	-	-	-	-	-	-	-	-	-	-	-	-	-	C	C	G	A	G	C	G	T	C	-	-	-	-	-	-	-	-	-	-	-	-	-	-	-	A	T	T	G	C	T
F62	-1	0	0	0	G	A	-	-	-	-	-	-	-	-	-	-	-	-	-	G	T	G	A	G	A	G	T	T	T	C	C	-	-	-	-	-	-	-	-	-	-	-	-	R	A	G	G	T	T
F63	-1	0	0	0	-	-	-	-	-	-	-	-	-	-	-	-	-	-	-	C	C	G	A	G	C	G	T	C	-	-	-	-	-	-	-	-	-	-	-	-	-	-	-	A	T	T	G	C	T
G64	-1	0	0	0	-	-	-	-	-	-	-	-	-	-	-	-	-	-	-	C	C	G	A	G	C	G	T	C	-	-	-	-	-	-	-	-	-	-	-	-	-	-	-	A	T	T	G	C	T
G65	-1	0	0	0	-	-	-	-	-	-	-	-	-	-	-	-	-	-	-	C	C	G	A	G	C	G	T	C	-	-	-	-	-	-	-	-	-	-	-	-	-	-	-	A	T	T	G	C	T
G66	-1	0	0	0	-	-	-	-	-	-	-	-	-	-	-	-	-	-	-	C	C	G	A	G	C	G	T	C	-	-	-	-	-	-	-	-	-	-	-	-	-	-	-	A	T	T	G	C	T
G67	-1	0	0	0	-	-	-	-	-	-	-	-	-	-	-	-	-	-	-	C	C	G	A	G	M	G	T	C	-	-	-	-	-	-	-	-	-	-	-	-	-	-	-	W	T	T	G	Y	T
G68	-1	0	0	0	-	-	-	-	-	-	-	-	-	-	-	-	-	-	-	C	C	G	A	G	C	G	T	C	-	-	-	-	-	-	-	-	-	-	-	-	-	-	-	A	T	T	G	C	T
G69	-1	0	0	0	-	-	-	-	-	-	-	-	-	-	-	-	-	-	-	C	C	G	A	G	C	G	T	C	-	-	-	-	-	-	-	-	-	-	-	-	-	-	-	A	T	T	G	C	T
G70	-1	0	0	0	-	-	-	-	-	-	-	-	-	-	-	-	-	-	-	C	C	R	A	K	C	G	T	S	-	-	-	-	-	-	-	-	-	-	-	-	-	-	-	A	T	T	G	C	T
J74	-1	0	0	0	-	-	-	-	-	-	-	-	-	-	-	-	-	-	-	C	C	G	A	G	C	G	T	C	-	-	-	-	-	-	-	-	-	-	-	-	-	-	-	A	T	T	G	C	T
J76	-1	0	0	0	-	-	-	-	-	-	-	-	-	-	-	-	-	-	-	C	C	G	A	G	C	G	T	C	-	-	-	-	-	-	-	-	-	-	-	-	-	-	-	A	T	T	G	C	T
J77	-1	0	0	0	-	-	-	-	-	-	-	-	-	-	-	-	-	-	-	C	C	G	A	G	C	G	T	C	-	-	-	-	-	-	-	-	-	-	-	-	-	-	-	A	T	T	G	C	T
J78	-1	0	0	0	-	-	-	-	-	-	-	-	-	-	-	-	-	-	-	M	Y	K	A	K	C	G	T	C	-	-	-	-	-	-	-	-	-	-	-	-	-	-	-	A	T	T	G	M	K
J79	-1	0	0	0	-	-	-	-	-	-	-	-	-	-	-	-	-	-	-	C	C	G	A	G	C	G	T	C	-	-	-	-	-	-	-	-	-	-	-	-	-	-	-	A	T	T	G	C	T
J80	-1	0	0	0	-	-	-	-	-	-	-	-	-	-	-	-	-	-	-	C	C	G	A	G	C	G	T	C	-	-	-	-	-	-	-	-	-	-	-	-	-	-	-	A	T	T	G	C	T
J81	-1	0	0	0	-	-	-	-	-	-	-	-	-	-	-	-	-	-	-	C	C	K	A	G	C	G	T	C	-	-	-	-	-	-	-	-	-	-	-	-	-	-	-	A	T	T	S	C	T
J82	-1	0	0	0	-	-	-	-	-	-	-	-	-	-	-	-	-	-	-	C	C	G	A	G	C	G	T	C	-	-	-	-	-	-	-	-	-	-	-	-	-	-	-	A	T	T	G	C	T
J83	-1	0	0	0	-	-	-	-	-	-	-	-	-	-	-	-	-	-	-	C	C	G	A	G	C	G	T	C	-	-	-	-	-	-	-	-	-	-	-	-	-	-	-	A	T	T	G	C	T
J84	-1	0	0	0	-	-	-	-	-	-	-	-	-	-	-	-	-	-	-	C	C	G	A	G	C	G	T	C	-	-	-	-	-	-	-	-	-	-	-	-	-	-	-	A	T	T	G	C	T
J85	-1	0	0	0	-	-	-	-	-	-	-	-	-	-	-	-	-	-	-	C	C	G	A	G	C	G	T	C	-	-	-	-	-	-	-	-	-	-	-	-	-	-	-	A	T	T	G	C	T
F86	-1	0	0	0	-	-	-	-	-	-	-	-	-	-	-	-	-	-	-	C	C	G	A	G	C	G	T	C	-	-	-	-	-	-	-	-	-	-	-	-	-	-	-	A	T	T	G	C	T
KU855474.1	-1	0	0	0	G	T	T	G	C	C	C	-	-	-	-	-	-	C	C	C	T	A	A	G	T	C	C	C	T	T	T	-	-	-	-	-	-	-	-	-	-	-	-	G	A	C	A	C	T
	7	7	7	7	7	7	7	7	7	7	7	7	7	7	7	7	7	7	7	8	8	8	8	8	8	8	8	8	8	8	8	8	8	8	8	8	8	8	8	8	8	8	8	8	8	8	8	8	8
	8	8	8	8	8	8	8	8	8	9	9	9	9	9	9	9	9	9	9	0	0	0	0	0	0	0	0	0	0	1	1	1	1	1	1	1	1	1	1	2	2	2	2	2	2	2	2	2	2
	1	2	3	4	5	6	7	8	9	0	1	2	3	4	5	6	7	8	9	0	1	2	3	4	5	6	7	8	9	0	1	2	3	4	5	6	7	8	9	0	1	2	3	4	5	6	7	8	9
Ab1	-1	0	0	0	-	-	-	-	-	-	-	-	-	-	-	-	-	-	-	-	-	-	-	-	-	-	-	-	-	-	-	-	-	-	-	-	-	-	-	-	-	-	-	-	-	-	-	-	-
Ab2	-1	0	0	0	G	G	C	C	C	C	C	G	T	C	C	C	C	C	T	-	-	-	-	-	C	C	C	A	G	G	A	A	G	G	G	G	A	C	G	G	G	C	C	-	-	-	-	-	C
Ab3	-1	0	0	0	-	-	-	-	-	-	-	-	-	-	-	-	-	-	-	-	-	-	-	-	-	-	-	-	-	-	-	-	-	-	-	-	-	-	-	-	-	-	-	-	-	-	-	-	-
Ab4	-1	0	0	0	-	-	-	-	-	-	-	-	-	-	-	-	-	-	-	-	-	-	-	-	-	-	-	-	-	-	-	-	-	-	-	-	-	-	-	-	-	-	-	-	-	-	-	-	-
Ab6	-1	0	0	0	-	-	-	-	-	-	-	-	-	-	-	-	-	-	-	-	-	-	-	-	-	-	-	-	-	-	-	-	-	-	-	-	-	-	-	-	-	-	-	-	-	-	-	-	-
Ab7	-1	0	0	0	G	G	S	C	C	C	C	C	T	M	C	C	C	C	A	-	-	-	-	T	A	C	C	M	G	G	A	A	A	G	G	G	R	C	G	G	G	G	Y	-	-	-	-	-	C
Ab8	-1	0	0	0	G	S	C	C	C	C	C	S	T	C	C	C	C	C	T	-	-	-	-	-	C	C	C	A	G	G	A	A	G	G	G	G	M	C	S	G	G	C	C	-	-	-	-	-	S
Ab9	-1	0	0	0	G	G	C	C	C	C	C	G	T	C	C	C	C	C	T	-	-	-	-	-	C	C	C	A	G	G	A	A	G	G	G	G	A	C	G	G	G	C	C	-	-	-	-	-	C
Ab10	-1	0	0	0	G	G	C	C	C	C	C	G	T	C	C	C	C	C	T	-	-	-	-	-	C	C	C	A	G	G	A	A	G	G	G	G	A	C	G	G	G	C	C	-	-	-	-	-	C
Ab11	-1	0	0	0	C	A	A	C	A	G	G	G	T	A	C	A	A	A	T	A	G	A	-	C	M	M	G	G	A	T	G	G	G	A	G	G	A	C	G	G	A	C	A	C	C	C	C	G	C
Ab12	-1	0	0	0	G	G	C	C	C	C	C	G	T	C	C	C	C	C	T	-	-	-	-	-	C	C	C	A	G	G	A	A	G	G	G	G	A	C	G	G	G	C	C	-	-	-	-	-	C
Ab13	-1	0	0	0	C	A	M	C	R	G	G	G	M	A	C	M	A	A	T	A	G	R	R	Y	W	C	R	G	A	T	R	G	G	A	G	G	A	C	G	C	C	C	A	C	C	C	C	C	C
Ab14	-1	0	0	0	G	G	S	C	C	M	C	G	T	C	C	C	C	G	W	Y	T	K	T	G	R	R	C	G	G	G	C	C	C	G	G	G	A	M	R	G	G	C	C	-	-	-	-	-	Y
G16	-1	0	0	0	G	G	C	C	C	C	C	G	T	C	C	C	C	C	T	-	-	-	-	-	C	C	C	A	G	G	A	A	G	G	G	G	A	C	G	G	G	C	C	-	-	-	-	-	Y
G17	-1	0	0	0	G	G	C	C	C	C	C	K	T	M	C	C	C	C	T	-	-	-	-	-	C	C	C	A	G	G	A	A	G	G	R	R	A	S	G	G	G	C	C	-	-	-	-	-	C
Ab19	-1	0	0	0	G	G	C	C	C	C	C	G	T	C	C	C	C	C	T	-	-	-	-	-	C	C	C	A	G	G	A	A	G	G	G	G	A	C	G	G	G	C	C	-	-	-	-	-	C
Ab20	-1	0	0	0	G	G	C	C	C	C	C	S	T	C	C	C	C	C	T	-	-	-	-	-	C	C	C	A	G	G	A	A	G	G	G	G	A	C	G	G	G	S	C	-	-	-	-	-	M
Ab21	-1	0	0	0	G	G	M	C	C	C	C	G	T	C	C	C	C	C	T	-	-	-	-	-	C	C	C	R	G	G	A	A	S	G	G	G	A	C	K	G	K	C	G	-	-	-	-	-	S
B22	-1	0	0	0	G	G	C	C	C	C	C	K	T	C	C	C	C	C	Y	-	-	-	-	-	C	C	C	M	G	R	A	A	R	G	G	G	A	C	G	G	S	C	C	-	-	-	-	-	C
B24	-1	0	0	0	G	G	C	C	C	C	C	G	T	C	C	C	C	C	T	G	-	-	-	-	T	T	C	T	A	G	G	G	G	G	G	G	A	C	G	G	G	C	C	-	-	-	-	-	C
B25	-1	0	0	0	G	G	C	C	C	C	C	G	T	C	C	C	C	C	T	-	-	-	-	-	C	C	C	A	G	G	A	A	G	G	G	G	A	C	G	G	G	C	C	-	-	-	-	-	C
B26	-1	0	0	0	G	G	C	C	C	C	C	G	T	C	C	C	C	C	T	-	-	-	-	-	C	C	C	A	G	G	A	A	G	G	G	G	A	C	G	G	G	C	C	-	-	-	-	-	C
B27	-1	0	0	0	G	G	C	C	C	C	C	G	T	C	C	C	C	C	T	-	-	-	-	-	C	C	C	A	G	G	A	A	G	G	G	G	A	C	G	G	G	C	C	-	-	-	-	-	C
B28	-1	0	0	0	G	G	C	C	C	C	C	G	T	C	C	C	C	C	C	-	-	-	-	-	C	C	-	-	-	-	A	A	G	G	G	G	A	M	G	G	G	C	C	-	-	-	-	-	C
B29	-1	0	0	0	G	G	C	C	C	C	C	G	T	C	C	C	G	G	C	G	A	A	G	C	A	T	C	A	G	C	C	C	C	G	G	G	A	C	G	G	G	C	C	-	-	-	-	-	C
B30	-1	0	0	0	G	C	C	C	C	C	S	T	C	C	C	C	C	Y	C	-	-	-	-	-	C	C	A	C	R	G	A	R	G	G	G	G	A	C	R	G	G	C	C	-	-	-	-	-	C
B32	-1	0	0	0	G	G	C	C	C	C	C	G	T	C	C	C	C	C	C	-	-	-	-	-	C	C	-	-	-	-	A	A	G	G	G	G	A	C	G	G	G	C	C	-	-	-	-	-	C
B33	-1	0	0	0	G	G	C	C	C	C	C	G	T	C	C	C	C	C	T	-	-	-	-	-	C	C	C	A	G	G	A	A	G	G	G	G	A	C	G	G	G	C	C	-	-	-	-	-	C
B34	-1	0	0	0	G	G	C	C	C	C	C	S	Y	C	C	C	C	C	T	-	-	-	-	-	C	C	C	A	G	K	A	M	S	G	G	G	A	S	G	G	G	C	C	-	-	-	-	-	C
B35	-1	0	0	0	G	G	C	C	C	C	C	G	T	C	C	C	C	C	T	-	-	-	-	-	C	C	C	A	G	G	A	A	R	G	G	S	M	C	G	G	K	M	C	-	-	-	-	-	C
B36	-1	0	0	0	G	G	C	C	C	C	C	G	T	C	C	C	C	C	T	-	-	-	-	-	Y	C	C	A	S	G	A	A	G	G	G	G	A	C	G	G	G	S	M	-	-	-	-	-	C
B37	-1	0	0	0	G	G	C	C	C	C	C	G	T	C	C	C	C	C	T	-	-	-	-	-	C	C	C	A	G	G	A	A	G	G	G	G	A	C	G	G	G	C	C	-	-	-	-	-	C
B38	-1	0	0	0	G	G	C	C	C	C	C	G	T	C	C	C	C	C	T	-	-	-	-	-	C	C	C	A	G	G	A	A	G	G	G	G	A	C	G	G	G	S	C	-	-	-	-	-	S
B39	-1	0	0	0	G	C	C	C	C	C	A	S	Y	C	C	C	R	R	W	-	-	-	-	T	C	T	Y	T	A	A	G	C	C	G	G	G	A	C	G	G	G	C	C	G	T	C	C	C	C
B41	-1	0	0	0	G	G	C	C	C	C	C	G	T	C	C	C	C	C	T	-	-	-	-	-	C	C	C	A	G	G	A	A	G	G	G	G	R	C	G	G	G	C	C	-	-	-	-	-	M
B42	-1	0	0	0	G	G	C	C	C	C	C	G	T	C	C	C	C	C	C	-	-	-	-	-	C	C	-	-	-	-	A	A	G	G	G	G	A	C	G	G	G	C	C	-	-	-	-	-	C
B43	-1	0	0	0	G	G	C	C	C	C	C	K	T	C	C	C	G	G	M	R	A	R	R	C	A	Y	C	R	G	C	C	C	C	G	R	G	A	C	R	G	G	C	C	-	-	-	-	-	C
B44	-1	0	0	0	G	G	C	C	C	C	C	G	T	C	C	C	C	C	T	-	-	-	-	-	C	C	C	A	G	G	A	A	G	G	G	G	A	C	G	G	G	C	C	-	-	-	-	-	C
D48	-1	0	0	0	G	G	C	C	C	C	C	G	T	C	C	C	C	C	T	-	-	-	-	-	C	C	C	A	G	G	A	A	G	G	G	G	A	C	G	G	G	C	C	-	-	-	-	-	C
D49	-1	0	0	0	G	G	C	C	C	C	C	G	T	C	C	C	G	G	C	G	A	A	G	C	A	T	C	A	G	C	C	C	C	G	G	G	A	C	G	G	G	C	C	-	-	-	-	-	C
D50	-1	0	0	0	G	G	C	C	C	C	C	G	T	C	C	C	G	G	C	G	A	A	G	C	A	T	C	A	G	C	C	C	C	G	G	G	A	C	G	G	G	C	C	-	-	-	-	-	C
D51	-1	0	0	0	G	C	C	C	C	C	S	G	T	C	S	C	G	G	K	-	-	-	-	T	C	T	Y	C	M	M	-	C	C	R	G	G	R	C	G	G	R	C	C	-	-	-	-	C	-
D52	-1	0	0	0	G	G	C	C	C	C	C	G	T	C	C	C	G	G	C	G	A	A	G	C	A	T	C	A	G	C	C	C	C	G	G	G	A	C	G	G	G	C	C	-	-	-	-	-	C
D53	-1	0	0	0	G	G	C	C	C	C	C	G	T	C	C	C	C	C	T	-	-	-	-	-	C	C	C	A	G	G	A	A	G	G	G	G	A	C	G	G	G	C	C	-	-	-	-	-	C
D54	-1	0	0	0	G	G	C	C	C	C	C	G	T	C	C	C	C	C	T	-	-	-	-	-	C	C	C	A	G	G	A	A	G	G	G	G	A	C	G	G	G	C	C	-	-	-	-	-	C
D55	-1	0	0	0	C	A	A	C	A	G	G	G	W	A	C	A	A	A	T	A	G	A	-	C	A	C	G	G	A	T	G	G	G	A	G	G	A	C	G	G	A	C	A	C	C	C	C	G	A
D56	-1	0	0	0	G	T	C	C	C	C	Y	G	T	C	C	C	G	G	C	-	-	-	-	Y	C	T	C	C	A	C	-	S	C	G	G	R	R	S	G	G	G	M	C	-	-	-	-	C	A
E57	-1	0	0	0	G	G	C	C	C	C	C	G	T	C	C	C	G	G	C	G	A	A	G	C	A	T	C	A	G	C	C	C	C	G	G	G	A	C	G	G	G	C	C	-	-	-	-	-	C
E58	-1	0	0	0	G	G	C	C	C	C	C	G	T	C	C	C	G	G	C	G	A	A	G	C	A	T	C	A	G	C	C	C	C	G	G	G	A	C	G	G	G	C	C	-	-	-	-	-	C
F59	-1	0	0	0	G	G	C	C	C	C	C	G	T	C	C	C	G	G	M	G	A	A	G	C	A	T	C	A	G	C	C	C	C	G	G	G	A	C	G	G	G	C	C	-	-	-	-	-	C
F60	-1	0	0	0	G	S	C	T	T	C	C	G	T	C	C	C	T	G	G	-	-	-	-	-	-	-	T	A	R	-	-	C	G	G	G	G	A	C	G	G	G	Y	C	-	-	-	-	-	C
F61	-1	0	0	0	G	C	C	C	C	C	C	G	T	C	C	C	G	G	T	-	-	-	-	T	C	T	C	C	A	-	G	C	C	G	G	G	A	C	G	G	G	C	C	-	-	-	-	-	C
F62	-1	0	0	0	G	G	A	C	R	G	T	A	G	T	S	R	A	R	S	T	C	R	A	M	G	C	C	G	G	C	A	Y	G	A	W	K	T	Y	S	R	C	T	Y	A	T	C	G	A	C
F63	-1	0	0	0	G	G	C	C	C	C	C	G	T	C	C	C	G	G	C	K	A	A	G	C	A	T	C	A	G	C	C	C	C	G	G	G	A	C	G	G	G	C	C	-	-	-	-	-	C
G64	-1	0	0	0	G	G	C	C	C	C	C	G	T	C	C	C	G	G	C	G	A	A	G	C	A	T	C	A	G	C	C	C	C	G	G	G	A	C	G	G	G	C	C	-	-	-	-	-	C
G65	-1	0	0	0	G	G	C	C	C	C	C	G	T	C	C	Y	C	C	T	-	-	-	-	-	C	C	C	A	G	G	A	A	K	G	G	G	A	C	G	G	G	C	Y	-	-	-	-	-	C
G66	-1	0	0	0	G	G	C	C	C	C	C	G	T	C	C	C	C	C	T	-	-	-	-	-	C	C	C	A	G	G	A	A	G	G	G	G	A	C	G	G	G	C	C	-	-	-	-	-	C
G67	-1	0	0	0	G	Y	C	C	C	C	C	S	T	C	C	C	G	G	Y	-	-	-	-	Y	C	T	C	C	A	S	-	C	C	G	G	G	R	C	G	G	G	C	C	-	-	-	-	C	-
G68	-1	0	0	0	G	G	C	C	C	C	C	G	T	C	C	C	G	G	C	G	A	A	G	C	A	T	C	A	G	C	C	C	C	G	G	G	A	C	G	G	G	C	C	-	-	-	-	-	C
G69	-1	0	0	0	G	G	C	C	C	C	C	G	T	C	C	C	C	C	T	-	-	-	-	-	C	C	C	A	G	G	A	A	G	G	G	G	A	C	G	G	G	C	C	-	-	-	-	-	C
G70	-1	0	0	0	G	G	C	C	C	C	C	G	T	C	C	C	G	G	M	G	A	A	G	C	A	T	C	A	G	C	C	C	C	G	G	G	A	C	G	G	G	C	C	-	-	-	-	-	M
J74	-1	0	0	0	G	T	C	C	C	C	C	G	T	C	C	C	G	G	Y	-	-	-	-	T	C	T	C	C	A	-	S	C	C	G	G	G	A	C	G	G	G	C	C	-	-	-	-	-	C
J76	-1	0	0	0	G	G	C	C	C	C	C	G	T	C	C	C	G	G	C	G	A	A	G	C	A	T	C	A	G	C	C	C	C	G	G	G	A	C	G	G	G	C	C	-	-	-	-	-	C
J77	-1	0	0	0	G	G	C	C	C	C	C	G	T	C	C	C	G	G	C	G	A	A	G	C	A	T	C	A	G	C	C	C	C	G	G	G	A	C	G	G	G	C	C	-	-	-	-	-	C
J78	-1	0	0	0	G	K	C	C	C	C	C	G	T	C	C	C	C	C	T	-	-	-	-	-	C	C	C	A	G	G	A	A	R	G	G	G	A	C	G	G	G	Y	C	-	-	-	-	-	M
J79	-1	0	0	0	G	G	C	C	C	C	C	G	T	C	C	C	C	C	Y	-	-	-	-	-	C	C	C	A	G	G	A	A	G	G	G	G	A	C	G	G	G	C	C	-	-	-	-	-	C
J80	-1	0	0	0	G	C	C	C	C	C	-	G	T	C	C	C	G	G	T	-	-	-	-	T	C	T	C	C	A	A	G	C	C	G	G	G	A	C	G	G	G	C	C	-	-	-	-	-	C
J81	-1	0	0	0	G	G	C	C	C	C	C	G	T	C	C	C	C	C	T	-	-	-	-	-	C	C	C	A	G	G	A	A	G	G	G	G	M	C	G	G	R	M	M	-	-	-	-	-	S
J82	-1	0	0	0	G	G	C	C	C	C	C	G	T	C	C	C	C	C	T	-	-	-	-	-	C	C	C	A	G	G	A	A	G	G	G	G	A	C	G	G	G	C	C	-	-	-	-	-	C
J83	-1	0	0	0	G	G	C	C	C	C	C	G	T	C	C	C	C	C	T	-	-	-	-	-	C	C	C	A	G	G	A	A	G	G	G	G	A	C	G	G	G	C	C	-	-	-	-	-	C
J84	-1	0	0	0	G	G	C	C	C	C	C	G	T	C	C	C	C	C	T	-	-	-	-	-	C	C	C	A	G	G	A	A	G	G	G	G	A	C	G	G	G	C	C	-	-	-	-	-	C
J85	-1	0	0	0	G	G	C	C	C	C	C	G	T	C	C	C	C	C	T	-	-	-	-	-	C	C	C	A	G	G	A	A	G	G	G	G	A	C	G	G	G	C	C	-	-	-	-	-	C
F86	-1	0	0	0	G	G	C	C	C	C	C	G	T	C	C	C	C	C	C	-	-	-	-	-	C	C	-	-	-	-	A	A	G	G	G	G	A	C	G	G	G	C	C	-	-	-	-	-	C
KU855474.1	-1	0	0	0	G	A	T	G	A	T	G	G	C	C	T	C	C	C	G	T	G	G	G	C	C	T	C	G	A	C	T	C	G	C	G	G	T	T	G	G	T	C	T	A	A	A	T	T	T
	8	8	8	8	8	8	8	8	8	8	8	8	8	8	8	8	8	8	8	8	8	8	8	8	8	8	8	8	8	8	8	8	8	8	8	8	8	8	8	8	8	9	9	9	9	9	9	9	9
	5	6	6	6	6	6	6	6	6	6	6	7	7	7	7	7	7	7	7	7	7	8	8	8	8	8	8	8	8	8	8	9	9	9	9	9	9	9	9	9	9	0	0	0	0	0	0	0	0
	9	0	1	2	3	4	5	6	7	8	9	0	1	2	3	4	5	6	7	8	9	0	1	2	3	4	5	6	7	8	9	0	1	2	3	4	5	6	7	8	9	0	1	2	3	4	5	6	7
Ab1	-1	0	0	0	-	-	-	-	-	-	-	-	-	-	-	-	-	-	-	-	-	-	-	-	-	-	-	-	-	-	-	-	-	-	-	-	-	-	-	-	-	-	-	-	-	-	-	-	-
Ab2	-1	0	0	0	-	-	-	C	A	G	C	G	G	C	G	G	C	A	C	C	-	-	G	Y	G	T	C	C	G	G	T	C	C	T	C	-	R	A	G	C	G	T	A	T	G	G	G	A	A
Ab3	-1	0	0	0	-	-	-	-	-	-	-	-	-	-	-	-	-	-	-	-	-	-	-	-	-	-	-	-	-	-	-	-	-	-	-	-	-	-	-	-	-	-	-	-	-	-	-	-	-
Ab4	-1	0	0	0	-	-	-	-	-	-	-	-	-	-	-	-	-	-	-	-	-	-	-	-	-	-	-	-	-	-	-	-	-	-	-	-	-	-	-	-	-	-	-	-	-	-	-	-	-
Ab6	-1	0	0	0	-	-	-	-	-	-	-	-	-	-	-	-	-	-	-	-	-	-	-	-	-	-	-	-	-	-	-	-	-	-	-	-	-	-	-	-	-	-	-	-	-	-	-	-	-
Ab7	-1	0	0	0	-	-	-	S	C	G	C	A	K	K	A	C	A	G	M	Y	-	-	M	M	K	G	S	M	C	G	T	A	C	C	C	G	A	A	C	S	K	T	W	T	G	S	A	R	R
Ab8	-1	0	0	0	-	-	-	C	A	G	S	G	G	S	G	G	C	R	C	C	-	-	G	T	G	T	C	C	G	G	T	C	M	T	C	-	G	A	R	C	G	T	A	W	G	G	G	A	A
Ab9	-1	0	0	0	-	-	-	S	A	G	C	G	G	M	G	G	C	A	C	C	-	-	G	Y	G	T	C	C	G	G	Y	C	C	T	C	-	G	A	G	C	G	K	A	T	G	G	G	A	A
Ab10	-1	0	0	0	-	-	-	C	A	G	C	G	G	C	G	G	C	A	C	C	-	-	G	T	G	T	C	C	G	G	T	C	C	T	C	-	G	A	G	C	G	T	A	T	G	G	G	A	A
Ab11	-1	0	0	0	-	-	-	-	-	G	C	A	T	C	C	A	A	A	C	A	-	-	C	T	C	G	G	Y	A	A	T	G	A	T	C	C	T	T	C	C	G	C	A	G	G	T	T	C	A
Ab12	-1	0	0	0	A	G	G	Y	A	G	C	G	G	C	G	G	C	A	C	C	-	-	G	T	G	T	C	C	G	G	T	C	C	T	C	-	G	A	G	C	G	T	A	C	-	-	-	-	-
Ab13	-1	0	0	0	-	-	-	-	-	G	G	A	T	C	C	T	G	A	C	C	-	-	C	T	C	C	C	G	C	A	T	G	A	T	C	T	G	G	G	A	G	G	A	C	G	C	C	C	A
Ab14	-1	0	0	0	-	-	-	M	R	Y	C	K	Y	C	G	G	R	W	C	C	-	-	K	K	T	C	C	C	A	A	G	M	S	K	M	A	C	C	T	S	C	A	A	W	G	G	T	A	G
G16	-1	0	0	0	-	-	-	C	A	G	C	G	G	C	G	G	C	A	C	C	-	-	G	T	G	T	C	C	G	G	T	C	C	T	C	-	G	A	G	C	G	T	A	T	G	G	G	A	A
G17	-1	0	0	0	-	-	-	-	A	S	C	G	G	C	G	G	C	A	C	M	-	-	C	G	G	K	C	C	G	G	T	C	C	T	C	W	A	A	G	-	G	T	A	T	G	G	G	A	A
Ab19	-1	0	0	0	-	-	-	C	A	G	C	G	G	C	G	G	C	A	C	C	-	-	G	T	G	T	C	C	G	G	T	C	C	T	C	-	G	A	G	C	G	T	A	T	G	G	G	A	A
Ab20	-1	0	0	0	-	-	-	M	A	R	C	G	G	C	G	G	M	A	C	C	-	-	G	T	G	T	C	C	G	G	T	C	C	T	C	-	R	A	G	M	G	T	A	T	G	G	G	A	A
Ab21	-1	0	0	0	-	-	-	T	W	Y	C	G	C	C	A	A	A	T	C	C	-	-	G	W	G	T	C	C	G	G	W	C	C	K	C	S	A	C	G	C	G	T	A	K	G	G	R	A	A
B22	-1	0	0	0	-	-	-	C	A	G	S	G	G	S	G	G	C	M	C	C	-	-	G	T	G	T	C	S	G	G	C	T	C	C	T	M	G	A	G	C	R	T	A	T	G	G	G	A	A
B24	-1	0	0	0	-	-	-	C	A	G	C	G	G	C	G	G	C	A	C	C	-	-	G	T	G	T	C	C	G	G	T	C	C	T	C	-	G	A	G	C	G	T	A	T	G	G	G	A	A
B25	-1	0	0	0	-	-	-	C	A	G	C	G	G	C	G	G	C	A	C	C	-	-	G	T	G	T	C	C	G	G	T	C	C	T	C	-	G	A	G	C	G	T	A	T	G	G	G	A	A
B26	-1	0	0	0	-	-	-	C	A	R	C	G	G	S	G	G	C	A	C	C	-	-	G	T	G	T	C	C	G	G	T	C	C	T	C	-	G	A	G	C	G	T	A	T	G	G	G	A	A
B27	-1	0	0	0	-	-	-	C	A	G	C	G	G	C	G	G	C	A	C	C	-	-	G	T	G	T	C	C	G	G	T	C	C	T	C	-	G	A	G	C	G	T	A	T	G	G	G	A	A
B28	-1	0	0	0	-	-	-	M	A	G	C	G	G	C	G	G	C	A	C	C	-	-	G	T	G	T	C	C	G	G	T	C	C	T	C	-	G	A	G	C	G	T	A	T	G	G	G	A	A
B29	-1	0	0	0	-	-	-	C	A	G	C	G	G	C	G	G	C	A	C	C	-	-	G	T	G	T	C	C	G	G	T	C	C	T	C	-	G	A	G	C	G	T	A	T	G	G	G	G	-
B30	-1	0	0	0	-	-	-	C	A	G	C	G	G	R	G	R	C	A	C	C	-	-	G	K	S	T	C	C	R	S	-	T	C	Y	Y	C	G	A	R	Y	G	T	A	T	R	G	G	A	A
B32	-1	0	0	0	-	-	-	C	A	G	C	G	G	C	G	G	C	A	C	C	-	-	G	T	G	T	C	C	G	G	T	C	C	T	C	-	G	A	G	C	G	T	A	T	G	G	G	A	A
B33	-1	0	0	0	-	-	-	C	A	G	C	G	G	C	G	G	C	A	C	C	-	-	G	T	G	T	C	C	G	G	T	C	C	T	C	C	G	A	G	C	G	T	A	T	G	G	G	A	A
B34	-1	0	0	0	-	-	-	C	A	R	C	G	G	C	S	G	S	R	C	C	-	-	S	Y	G	W	C	C	G	K	W	Y	S	K	S	-	G	A	Y	C	K	K	A	W	G	G	G	A	A
B35	-1	0	0	0	-	-	-	R	G	C	C	C	T	C	S	A	R	M	S	C	-	-	A	W	G	K	S	C	G	G	T	C	C	T	C	-	R	A	S	Y	G	T	A	K	G	G	K	A	A
B36	-1	0	0	0	-	-	-	C	A	R	M	G	G	C	R	G	C	R	C	C	-	-	G	Y	S	Y	C	C	G	G	T	C	C	T	C	S	R	A	C	C	T	T	A	W	G	G	G	A	A
B37	-1	0	0	0	-	-	-	C	A	G	C	G	G	C	G	G	C	A	C	C	-	-	G	T	G	T	C	C	C	C	C	C	T	C	C	-	C	A	G	G	A	A	G	G	G	G	A	C	G
B38	-1	0	0	0	-	-	-	C	A	G	C	G	G	C	G	G	G	A	C	C	G	S	G	T	G	T	C	C	G	G	T	C	C	T	C	-	G	A	G	C	G	T	A	T	G	G	G	A	A
B39	-1	0	0	0	-	-	-	C	A	K	T	G	G	C	G	G	T	A	C	C	-	-	T	A	A	T	C	C	S	G	Y	C	M	T	C	-	Y	T	S	S	R	W	A	T	G	G	K	R	-
B41	-1	0	0	0	-	-	-	C	A	G	C	G	G	C	G	G	C	R	C	C	-	-	G	T	G	T	C	C	G	G	T	C	Y	T	C	-	G	A	G	C	G	T	A	T	G	G	G	A	A
B42	-1	0	0	0	-	-	-	C	A	G	C	G	G	C	G	G	C	A	C	C	-	-	G	T	G	T	C	C	G	G	T	C	C	T	C	-	G	A	G	C	G	T	A	T	G	G	G	A	A
B43	-1	0	0	0	-	-	-	S	A	G	S	G	C	S	G	G	K	C	M	C	-	-	G	G	S	T	C	C	G	R	T	C	C	T	M	-	R	A	G	W	G	Y	A	T	G	G	G	K	-
B44	-1	0	0	0	-	-	-	C	A	G	C	G	G	C	G	G	C	A	C	C	-	-	G	T	G	T	C	C	G	G	T	C	C	T	C	-	G	A	G	C	G	T	A	T	G	G	G	A	A
D48	-1	0	0	0	-	-	-	C	A	G	C	G	G	C	G	G	C	A	C	C	-	-	G	T	G	T	C	C	G	G	T	C	C	T	C	-	G	A	G	C	G	T	A	T	G	G	G	A	A
D49	-1	0	0	0	-	-	-	C	A	G	C	G	G	C	G	G	S	A	C	C	-	-	G	T	G	T	C	C	G	G	T	C	C	T	C	-	G	A	G	C	G	T	A	T	G	G	G	G	-
D50	-1	0	0	0	-	-	-	C	A	G	C	G	G	C	G	G	C	A	C	C	-	-	G	T	G	T	C	C	G	G	T	C	C	T	C	-	G	A	G	C	G	T	A	T	G	G	G	G	-
D51	-1	0	0	0	-	-	-	M	M	G	M	S	M	S	G	R	M	A	M	Y	-	-	S	Y	S	Y	C	C	G	G	S	C	C	S	M	-	S	A	G	Y	G	K	R	K	G	G	G	G	-
D52	-1	0	0	0	-	-	-	C	A	G	C	G	G	C	G	G	C	A	C	C	-	-	G	T	G	T	C	C	G	G	T	C	C	T	C	-	G	A	G	C	G	T	A	T	G	G	G	G	-
D53	-1	0	0	0	-	-	-	C	A	G	C	G	G	C	G	G	C	R	C	C	-	-	G	T	G	T	C	C	G	G	T	C	C	T	C	-	G	A	G	C	G	T	A	T	G	G	G	A	A
D54	-1	0	0	0	-	-	-	C	A	G	C	G	G	C	G	G	C	R	C	C	-	-	G	T	G	T	C	C	G	G	T	C	C	T	C	-	G	A	G	C	G	T	A	T	G	G	G	A	A
D55	-1	0	0	0	-	-	-	-	-	G	C	A	T	C	C	A	A	A	C	A	-	-	C	T	C	G	G	T	A	A	T	G	A	T	C	C	T	T	C	C	G	C	A	G	G	T	T	C	A
D56	-1	0	0	0	-	-	-	S	A	G	C	S	G	Y	R	G	M	R	C	C	-	-	G	T	G	T	C	C	G	M	W	C	C	T	M	-	G	A	G	Y	R	K	A	T	G	G	G	G	-
E57	-1	0	0	0	-	-	-	C	A	G	C	G	G	C	G	G	C	A	C	C	-	-	G	T	G	T	C	C	G	G	T	C	C	T	C	-	G	A	G	C	G	T	A	T	G	G	G	G	-
E58	-1	0	0	0	-	-	-	C	A	G	C	G	G	C	G	G	C	A	C	C	-	-	G	T	G	T	C	C	G	G	T	C	C	T	C	-	G	A	G	C	G	T	A	T	G	G	G	G	-
F59	-1	0	0	0	-	-	-	C	M	S	C	G	G	C	G	S	S	A	C	C	-	-	G	T	G	T	Y	C	S	G	T	Y	C	T	C	-	G	A	G	S	G	T	A	T	G	G	K	G	-
F60	-1	0	0	0	-	-	-	M	A	G	K	G	K	C	G	G	C	M	Y	C	-	-	A	T	G	T	C	Y	G	G	T	C	C	T	C	-	G	A	S	C	G	T	A	T	G	G	G	G	-
F61	-1	0	0	0	-	-	-	C	A	G	C	G	G	C	G	G	C	A	C	C	-	-	G	T	G	T	C	C	G	G	T	C	C	T	C	-	G	A	G	T	G	T	A	T	G	G	G	G	-
F62	-1	0	0	0	T	T	S	Y	T	A	M	G	C	C	G	G	C	A	Y	G	-	-	A	W	K	T	Y	S	R	C	T	Y	A	T	C	-	G	A	C	C	G	W	A	C	G	R	T	S	T
F63	-1	0	0	0	-	-	-	C	A	G	C	G	G	C	G	G	C	A	C	C	C	T	G	T	G	T	C	C	G	G	T	C	C	-	-	-	G	A	G	C	G	T	A	T	G	G	G	G	-
G64	-1	0	0	0	-	-	-	C	A	G	C	G	G	C	G	G	C	A	C	C	-	-	G	T	G	T	C	C	G	G	T	C	C	T	C	-	G	A	G	C	G	T	A	T	G	G	G	G	-
G65	-1	0	0	0	-	-	-	C	A	G	C	G	G	C	G	G	C	A	C	C	-	-	G	T	G	W	C	C	G	G	T	C	C	T	C	-	G	A	G	C	G	T	A	T	G	G	G	A	A
G66	-1	0	0	0	-	-	-	C	A	G	C	G	G	C	G	G	C	A	C	C	-	-	G	T	G	T	C	C	G	G	T	C	C	T	C	-	G	A	G	C	G	T	A	T	G	G	G	A	A
G67	-1	0	0	0	-	-	-	M	A	G	M	G	G	G	G	G	M	A	C	C	-	-	G	K	G	T	C	C	G	S	Y	C	C	T	M	-	G	A	G	K	G	T	A	T	G	G	G	G	-
G68	-1	0	0	0	-	-	-	C	A	G	C	G	G	C	G	G	C	A	C	C	-	-	G	T	G	T	C	C	G	G	T	C	C	T	C	-	G	A	G	C	G	T	A	T	G	G	G	G	-
G69	-1	0	0	0	-	-	-	C	A	G	C	G	G	C	G	G	C	A	C	C	-	-	G	T	G	T	C	C	G	G	T	C	C	T	C	-	G	A	G	C	G	T	A	T	G	G	G	A	A
G70	-1	0	0	0	-	-	-	C	A	K	C	G	G	C	G	G	Y	A	C	C	-	-	G	T	G	T	C	C	G	G	T	C	C	T	C	-	R	A	G	S	G	T	A	T	G	G	G	K	-
J74	-1	0	0	0	-	-	-	C	A	G	C	G	G	C	G	G	C	A	C	C	-	-	G	T	G	T	C	C	G	G	T	C	C	T	M	-	G	A	G	T	G	T	A	T	G	G	G	G	-
J76	-1	0	0	0	-	-	-	C	A	G	C	G	G	C	G	G	C	A	C	C	-	-	G	T	G	T	C	C	G	G	T	C	C	T	C	-	G	A	G	C	G	T	A	T	G	G	G	G	-
J77	-1	0	0	0	-	-	-	C	A	G	C	G	G	C	G	G	C	A	C	C	-	-	G	T	G	T	C	C	G	G	T	C	C	T	C	-	G	A	G	C	G	T	A	T	G	G	G	G	-
J78	-1	0	0	0	-	-	-	S	A	S	S	G	K	M	S	G	Y	W	C	C	-	-	G	Y	G	T	C	C	G	G	T	C	M	T	C	-	G	A	R	W	G	T	A	T	G	G	K	A	A
J79	-1	0	0	0	-	-	-	C	A	G	C	G	G	C	G	G	C	A	C	C	-	-	G	T	G	T	C	C	G	G	T	C	C	T	C	-	G	A	G	C	G	T	A	T	G	G	G	A	A
J80	-1	0	0	0	-	-	-	C	A	G	C	G	G	C	G	G	C	A	C	C	-	-	G	T	G	T	C	C	G	G	T	C	C	T	C	-	G	A	G	T	G	T	A	T	G	G	G	G	-
J81	-1	0	0	0	-	-	-	C	A	G	S	G	G	C	G	G	C	R	Y	C	-	-	G	T	G	T	C	C	G	G	T	C	C	T	C	-	G	A	G	C	G	T	A	W	G	G	G	A	A
J82	-1	0	0	0	-	-	-	C	A	G	C	G	G	C	G	G	C	A	C	C	-	-	G	T	G	T	C	C	G	G	T	C	C	T	C	-	G	A	G	C	G	T	A	T	G	G	G	A	A
J83	-1	0	0	0	-	-	-	C	A	G	C	G	G	C	G	G	C	A	C	C	-	-	G	T	G	T	C	C	G	G	T	C	C	T	C	-	G	A	G	C	G	T	A	T	G	G	G	A	A
J84	-1	0	0	0	-	-	-	C	A	G	C	G	G	C	G	G	C	A	C	C	-	-	G	T	G	T	C	C	G	G	T	C	C	T	C	-	G	A	G	C	G	T	A	T	G	G	G	A	A
J85	-1	0	0	0	-	-	-	C	A	G	C	G	G	C	G	G	C	A	C	C	-	-	G	T	G	T	C	C	G	G	T	C	C	T	C	-	G	A	G	C	G	T	A	T	G	G	G	A	A
F86	-1	0	0	0	-	-	-	C	A	G	C	G	G	C	G	G	C	A	C	C	-	-	G	T	G	T	C	C	G	G	T	C	C	T	C	-	G	A	G	C	G	T	A	T	G	G	G	A	A
KU855474.1	-1	0	0	0	-	-	-	C	G	G	C	A	G	C	C	G	T	G	G	C	A	-	A	C	A	G	G	T	G	G	T	C	G	T	C	-	G	A	T	G	A	T	T	C	G	G	T	G	C
	9	9	9	9	9	9	9	9	9	9	9	9	9	9	9	9	9	9	9	9	9	9	9	9	9	9	9	9	9	9	9	9	9	9	9	9	9	9	9	9	9	9	9	9	9	9	9	9	9
	3	3	3	4	4	4	4	4	4	4	4	4	4	5	5	5	5	5	5	5	5	5	5	6	6	6	6	6	6	6	6	6	6	7	7	7	7	7	7	7	7	7	7	8	8	8	8	8	8
	7	8	9	0	1	2	3	4	5	6	7	8	9	0	1	2	3	4	5	6	7	8	9	0	1	2	3	4	5	6	7	8	9	0	1	2	3	4	5	6	7	8	9	0	1	2	3	4	5
Ab1	-1	0	0	0	-	-	-	-	-	-	-	-	-	-	-	-	-	-	-	-	-	-	-	-	-	-	-	-	-	-	-	-	-	-	-	-	-	-	-	-	-	-	-	-	-	-	-	-	-
Ab2	-1	0	0	0	-	-	-	-	-	-	-	-	-	T	T	T	T	-	-	-	G	T	-	C	A	C	C	C	G	C	T	C	-	C	T	G	T	A	G	G	T	C	C	G	G	C	C	G	G
Ab3	-1	0	0	0	-	-	-	-	-	-	-	-	-	-	-	-	-	-	-	-	-	-	-	-	-	-	-	-	-	-	-	-	-	-	-	-	-	-	-	-	-	-	-	-	-	-	-	-	-
Ab4	-1	0	0	0	-	-	-	-	-	-	-	-	-	-	-	-	-	-	-	-	-	-	-	-	-	-	-	-	-	-	-	-	-	-	-	-	-	-	-	-	-	-	-	-	-	-	-	-	-
Ab6	-1	0	0	0	-	-	-	-	-	-	-	-	-	-	-	-	-	-	-	-	-	-	-	-	-	-	-	-	-	-	-	-	-	-	-	-	-	-	-	-	-	-	-	-	-	-	-	-	-
Ab7	-1	0	0	0	-	-	-	-	-	-	-	-	-	K	T	W	W	-	-	-	-	W	C	W	C	C	C	T	G	C	T	C	T	W	G	A	G	A	R	G	Y	C	C	G	G	C	C	G	G
Ab8	-1	0	0	0	C	G	G	M	M	G	C	A	A	C	T	T	T	T	T	C	-	W	-	C	M	C	C	C	Y	C	T	C	-	C	T	G	T	A	G	G	K	S	C	G	G	G	C	G	G
Ab9	-1	0	0	0	-	G	G	A	A	G	C	A	A	Y	T	T	T	T	T	T	G	T	-	C	A	C	C	C	G	C	T	C	-	C	T	G	T	A	G	G	T	C	C	G	G	C	C	G	G
Ab10	-1	0	0	0	-	-	-	-	-	-	-	-	-	T	T	T	T	-	-	T	G	T	-	C	A	C	C	C	G	C	T	C	-	C	T	G	T	A	G	G	T	C	C	G	G	C	C	G	G
Ab11	-1	0	0	0	-	-	-	-	-	-	-	-	-	-	-	-	-	-	-	-	-	-	-	T	G	A	T	C	C	T	T	C	-	-	C	G	C	A	G	G	T	W	C	A	C	C	T	A	C
Ab12	-1	0	0	0	-	-	-	-	-	-	-	-	-	T	T	T	T	-	-	T	G	T	-	C	A	C	C	C	G	C	T	C	-	C	T	G	T	A	G	G	K	S	C	G	G	C	C	G	G
Ab13	-1	0	0	0	-	-	-	-	-	-	-	-	-	-	C	C	T	C	C	C	K	C	A	K	G	A	T	C	A	T	T	C	-	-	A	G	C	R	R	G	A	Y	C	W	Y	C	T	A	A
Ab14	-1	0	0	0	-	-	-	-	-	-	-	-	-	-	-	-	-	W	A	G	G	T	S	A	Y	M	C	C	T	C	G	C	T	G	A	A	T	A	T	G	A	G	S	G	G	T	C	C	G
G16	-1	0	0	0	-	-	-	-	-	-	-	-	-	T	T	T	T	-	-	-	G	T	-	C	A	C	C	C	G	C	T	C	-	C	T	G	T	A	G	G	T	C	C	G	G	C	C	G	G
G17	-1	0	0	0	-	-	-	-	-	-	-	-	-	T	T	T	T	T	-	-	G	T	-	C	A	G	T	S	S	C	K	C	-	-	C	R	W	A	G	G	T	A	Y	G	G	C	S	R	R
Ab19	-1	0	0	0	-	-	-	-	-	-	-	-	-	T	T	T	T	-	-	-	G	T	-	C	A	C	C	C	G	C	T	C	-	C	T	G	T	A	G	G	T	C	C	G	G	C	C	G	G
Ab20	-1	0	0	0	-	-	-	-	-	-	-	-	-	T	T	T	T	-	-	-	G	T	-	C	A	C	C	S	G	S	T	C	-	M	T	G	T	W	G	G	K	C	C	R	G	C	C	G	G
Ab21	-1	0	0	0	-	-	-	-	-	-	-	-	-	T	M	S	T	R	-	-	G	K	-	M	A	M	C	C	C	Y	T	C	-	-	C	G	T	A	G	S	S	W	Y	W	G	C	Y	K	G
B22	-1	0	0	0	-	-	-	-	-	-	-	-	-	T	T	T	T	-	-	-	K	T	-	C	A	C	C	T	C	C	T	T	-	C	C	G	G	A	A	G	K	Y	C	S	G	G	C	G	G
B24	-1	0	0	0	-	-	-	-	-	-	-	-	-	T	T	T	T	-	-	-	G	T	-	C	A	C	C	C	G	C	T	C	-	C	C	G	T	A	G	G	T	C	C	G	G	C	C	G	G
B25	-1	0	0	0	-	-	-	-	-	-	-	-	-	T	T	T	T	-	-	-	G	T	-	C	A	C	C	C	G	C	T	C	-	C	T	G	T	A	G	G	T	C	C	G	G	C	C	G	G
B26	-1	0	0	0	-	-	-	-	-	-	-	-	-	T	T	T	T	-	-	-	G	T	-	C	A	C	C	C	G	C	T	C	-	C	T	G	T	A	G	G	K	C	C	G	G	S	C	G	G
B27	-1	0	0	0	-	-	-	-	-	-	-	-	-	T	T	T	T	T	-	-	G	T	-	C	A	C	C	C	G	C	T	C	-	C	T	G	T	A	G	G	T	C	C	G	G	C	C	G	G
B28	-1	0	0	0	-	-	-	-	-	-	-	-	-	T	T	T	T	T	-	T	G	T	-	C	A	C	C	C	G	C	T	C	-	C	T	G	T	A	G	G	T	C	C	G	G	C	C	G	G
B29	-1	0	0	0	-	-	-	-	-	-	-	-	-	C	T	C	T	-	-	-	G	T	-	C	A	C	C	C	G	C	T	C	-	G	T	G	T	A	G	G	T	C	C	G	G	C	C	G	G
B30	-1	0	0	0	-	-	-	-	-	-	-	-	-	T	T	T	Y	-	-	-	R	T	-	C	A	C	C	C	G	C	T	C	-	Y	Y	G	T	A	G	G	T	C	C	M	C	C	Y	T	W
B32	-1	0	0	0	-	-	-	-	-	-	-	-	-	T	T	T	T	T	-	T	G	T	-	C	A	C	C	C	G	C	T	C	-	C	T	G	T	A	G	G	T	C	C	G	G	C	C	G	G
B33	-1	0	0	0	-	-	-	-	-	-	-	-	-	T	T	T	T	T	-	-	G	T	-	C	A	C	C	C	G	C	T	C	-	C	T	G	T	A	G	G	T	C	C	G	G	C	C	G	G
B34	-1	0	0	0	-	-	-	-	-	-	-	-	-	T	T	T	K	T	-	-	S	Y	-	C	A	C	C	R	S	Y	T	C	-	S	Y	G	K	A	G	S	T	C	T	Y	G	S	C	C	G
B35	-1	0	0	0	-	-	-	-	-	-	-	-	-	T	T	K	T	T	-	-	G	Y	-	C	W	S	C	C	S	C	T	C	-	C	T	G	W	A	S	S	T	-	W	S	S	T	Y	Y	K
B36	-1	0	0	0	-	-	-	-	-	-	-	-	-	T	T	T	T	-	-	-	G	T	-	C	M	C	C	C	G	C	T	C	T	Y	T	G	T	A	G	G	T	C	C	G	G	C	C	G	G
B37	-1	0	0	0	-	-	-	-	-	-	-	-	-	A	A	A	G	-	-	-	G	C	A	G	C	G	G	C	G	G	C	A	-	C	C	G	T	G	T	C	T	C	C	G	G	C	C	G	G
B38	-1	0	0	0	-	-	-	-	-	-	-	-	-	T	T	T	T	-	-	-	G	T	-	C	M	C	C	C	S	S	T	C	-	C	W	G	W	A	G	G	T	C	C	G	G	C	C	G	S
B39	-1	0	0	0	-	-	-	-	-	-	-	-	-	G	T	M	K	-	-	-	G	T	-	C	A	C	C	C	M	Y	T	S	-	M	A	G	Y	A	C	G	R	A	C	K	W	-	S	C	G
B41	-1	0	0	0	-	-	-	-	-	-	-	-	-	-	C	T	T	T	T	T	G	T	-	C	A	C	C	C	S	C	T	C	-	C	T	G	K	A	G	G	K	C	C	G	G	S	C	G	G
B42	-1	0	0	0	-	-	-	-	-	-	-	-	-	T	T	T	T	T	-	T	G	T	-	C	A	C	C	C	G	C	T	C	-	C	T	G	T	A	G	G	T	C	C	G	G	C	C	G	G
B43	-1	0	0	0	-	-	-	-	-	-	-	-	-	K	T	C	T	-	-	-	G	T	-	C	A	C	C	C	R	C	T	C	-	G	T	G	T	A	G	G	T	C	C	G	G	C	C	G	G
B44	-1	0	0	0	-	-	-	-	-	-	-	-	-	T	T	T	T	-	-	-	G	T	-	C	A	C	C	C	G	C	T	C	-	C	T	G	T	A	G	G	T	C	C	G	G	C	C	G	G
D48	-1	0	0	0	-	-	-	-	-	-	-	-	-	T	T	T	T	-	-	-	G	T	-	C	A	C	C	C	G	C	T	C	-	C	T	G	T	A	G	G	T	C	C	G	G	C	C	G	G
D49	-1	0	0	0	-	-	-	-	-	-	-	-	-	S	T	C	T	-	-	-	G	T	-	C	A	C	C	C	G	C	T	C	-	G	T	G	T	A	K	G	T	C	C	G	G	C	C	G	G
D50	-1	0	0	0	-	-	-	-	-	-	-	-	-	C	T	C	T	-	-	-	G	T	-	C	A	C	C	C	G	C	T	C	-	G	T	G	T	A	G	G	T	C	C	G	G	C	C	G	G
D51	-1	0	0	0	-	-	-	-	-	-	-	-	-	S	T	S	K	-	-	-	G	T	-	C	A	C	C	C	A	Y	T	S	-	G	Y	G	W	A	G	A	R	T	C	G	G	T	C	C	S
D52	-1	0	0	0	-	-	-	-	-	-	-	-	-	C	T	C	T	-	-	-	G	T	-	C	A	C	C	C	G	C	T	C	-	G	T	G	T	A	G	G	T	C	C	G	G	C	C	G	G
D53	-1	0	0	0	-	-	-	-	-	-	-	-	-	T	T	T	-	-	-	T	G	T	-	C	A	C	C	C	G	C	T	C	-	C	T	G	T	A	G	G	T	C	C	G	G	M	C	G	G
D54	-1	0	0	0	-	-	-	-	-	-	-	-	-	T	T	T	-	-	-	T	G	T	-	C	A	C	C	C	G	C	T	C	-	C	T	G	T	A	G	G	T	C	C	G	G	M	C	G	G
D55	-1	0	0	0	-	-	-	-	-	-	-	-	-	-	-	-	-	-	-	-	-	-	-	-	-	-	-	-	-	-	T	C	-	-	C	K	C	A	G	G	T	T	C	A	C	C	T	A	C
D56	-1	0	0	0	-	-	-	-	-	-	-	-	-	M	T	C	T	-	-	-	G	T	-	C	A	C	C	M	A	C	T	C	-	G	C	G	T	A	K	G	S	C	M	G	K	-	C	C	G
E57	-1	0	0	0	-	-	-	-	-	-	-	-	-	C	T	C	T	-	-	-	G	T	A	C	A	C	C	C	G	C	T	C	-	G	T	G	T	A	G	G	T	C	C	G	G	C	C	G	G
E58	-1	0	0	0	-	-	-	-	-	-	-	-	-	C	T	C	T	-	-	-	G	T	-	C	A	C	C	C	G	C	T	C	-	G	T	G	T	A	G	G	T	C	C	G	G	C	C	G	G
F59	-1	0	0	0	-	-	-	-	-	-	-	-	-	Y	T	C	T	-	-	-	G	Y	-	C	M	C	C	C	G	C	T	C	-	G	W	G	T	A	G	G	C	C	C	C	K	C	C	G	A
F60	-1	0	0	0	-	-	-	-	-	-	-	-	-	Y	T	T	T	-	-	-	G	T	-	C	A	C	C	C	G	C	T	C	-	C	C	G	T	A	G	G	T	C	C	A	G	C	T	G	G
F61	-1	0	0	0	-	-	-	-	-	-	-	-	-	C	T	C	C	-	-	-	G	T	-	C	A	C	C	C	A	C	T	C	-	G	T	G	T	A	G	G	C	C	C	G	G	-	C	C	G
F62	-1	0	0	0	-	-	-	-	-	-	-	-	-	C	W	T	T	-	-	-	G	Y	-	C	A	T	T	S	Y	T	G	K	G	G	T	R	G	A	R	G	K	M	Y	K	G	Y	M	K	C
F63	-1	0	0	0	-	-	-	-	-	-	-	-	-	C	T	C	T	-	-	-	G	T	-	C	A	C	C	C	G	C	T	C	-	G	T	G	T	A	G	G	T	C	C	G	G	C	C	G	G
G64	-1	0	0	0	-	-	-	-	-	-	-	-	-	C	T	C	T	-	-	-	G	T	-	C	A	C	C	C	G	C	T	C	-	G	T	G	T	A	G	G	T	C	C	G	G	C	C	G	G
G65	-1	0	0	0	-	-	-	-	-	-	-	-	-	T	T	T	K	C	G	T	R	T	-	S	R	S	M	M	G	C	T	Y	-	C	T	K	T	W	K	G	T	C	C	G	R	C	C	S	G
G66	-1	0	0	0	-	-	-	-	-	-	-	-	-	T	T	T	T	-	-	T	G	T	-	C	A	C	C	C	G	C	T	C	-	C	T	G	T	A	G	G	T	C	C	G	G	Y	C	G	G
G67	-1	0	0	0	-	-	-	-	-	-	-	-	-	Y	T	C	T	-	-	-	G	T	-	C	W	C	C	C	A	C	T	C	-	G	S	G	T	A	G	R	S	C	C	G	G	C	C	G	G
G68	-1	0	0	0	-	-	-	-	-	-	-	-	-	C	T	C	T	-	-	-	G	T	-	C	A	C	C	C	G	C	T	C	-	G	T	G	T	A	G	G	T	C	C	G	G	C	C	G	G
G69	-1	0	0	0	-	-	-	-	-	-	-	-	-	T	T	T	T	T	-	-	G	T	-	C	A	C	C	C	G	C	T	C	-	C	T	G	T	A	G	G	T	C	C	G	G	C	C	G	G
G70	-1	0	0	0	-	-	-	-	-	-	-	-	-	C	T	C	T	-	-	-	G	T	-	C	A	C	C	C	S	C	T	C	-	G	T	G	T	A	G	G	T	C	C	G	G	C	C	G	G
J74	-1	0	0	0	-	-	-	-	-	-	-	-	-	C	T	C	T	-	-	-	G	T	-	C	A	C	C	C	A	C	T	C	-	G	T	G	T	A	G	R	C	C	C	G	G	-	C	C	G
J76	-1	0	0	0	-	-	-	-	-	-	-	-	-	C	T	C	T	-	-	-	G	T	-	C	A	C	C	C	G	C	T	C	-	G	T	G	T	A	G	G	T	C	C	G	G	C	C	G	G
J77	-1	0	0	0	-	-	-	-	-	-	-	-	-	C	T	C	T	-	-	-	G	T	-	C	A	C	C	C	G	C	T	C	-	G	T	G	T	A	G	G	T	C	C	G	G	C	C	G	G
J78	-1	0	0	0	-	-	-	-	-	-	-	-	-	T	T	T	Y	-	-	-	G	T	-	C	Y	Y	C	Y	G	C	T	C	-	Y	W	G	K	A	G	G	Y	C	C	G	G	S	C	G	G
J79	-1	0	0	0	-	-	-	-	-	-	-	-	-	T	T	T	T	-	-	-	G	T	-	C	A	C	C	C	G	C	T	C	-	C	T	G	T	A	G	G	T	C	C	G	G	C	C	G	G
J80	-1	0	0	0	-	-	-	-	-	-	-	-	-	C	T	C	T	-	-	-	G	T	-	C	A	C	T	C	A	C	T	C	-	G	T	G	T	A	G	G	T	C	C	G	G	-	C	C	G
J81	-1	0	0	0	-	-	-	-	-	-	-	-	-	-	C	T	T	T	T	T	G	G	-	C	A	C	C	C	G	C	T	C	-	C	A	G	G	A	G	G	G	C	C	G	G	G	C	G	G
J82	-1	0	0	0	-	-	-	-	-	-	-	-	-	T	T	T	T	T	-	-	G	T	-	C	A	C	C	C	G	C	T	C	-	C	T	G	T	A	G	G	T	C	C	G	G	C	C	G	G
J83	-1	0	0	0	-	-	-	-	-	-	-	-	-	T	T	T	T	T	-	-	G	T	-	C	A	C	C	C	G	C	T	C	-	C	T	G	T	A	G	G	T	C	C	G	G	C	C	G	G
J84	-1	0	0	0	-	-	-	-	-	-	-	-	-	T	T	T	T	T	-	-	G	T	-	C	A	C	C	C	G	C	T	C	-	C	T	G	T	A	G	G	T	C	C	G	G	C	C	G	G
J85	-1	0	0	0	-	-	-	-	-	-	-	-	-	T	T	T	-	-	-	T	G	T	-	C	A	C	C	C	G	C	T	C	-	C	T	G	T	A	G	G	T	C	C	G	G	C	C	G	G
F86	-1	0	0	0	-	-	-	-	-	-	-	-	-	T	T	T	T	T	-	T	G	T	-	C	A	C	C	C	G	C	T	C	-	C	T	G	T	A	G	G	T	C	C	G	G	C	C	G	G
KU855474.1	-1	0	0	0	-	-	-	-	-	-	-	A	G	A	C	C	C	C	A	C	A	A	A	C	T	T	G	A	C	C	C	C	G	A	T	G	C	A	C	C	C	C	A	C	T	T	C	G	G
	1	1	1	1	1	1	1	1	1	1	1	1	1	1	1	1	1	1	1	1	1	1	1	1	1	1	1	1	1	1	1	1	1	1	1	1	1	1	1	1	1	1	1	1	1	1	1	1	1
	0	0	0	0	0	0	0	0	0	0	0	0	0	0	0	0	0	0	0	0	0	0	0	0	0	0	0	0	0	0	0	0	0	0	0	0	0	0	0	0	0	0	0	0	0	0	0	0	0
	1	1	1	1	1	2	2	2	2	2	2	2	2	2	2	3	3	3	3	3	3	3	3	3	3	4	4	4	4	4	4	4	4	4	4	5	5	5	5	5	5	5	5	5	5	6	6	6	6
	5	6	7	8	9	0	1	2	3	4	5	6	7	8	9	0	1	2	3	4	5	6	7	8	9	0	1	2	3	4	5	6	7	8	9	0	1	2	3	4	5	6	7	8	9	0	1	2	3
Ab1	-1	0	0	0	-	-	-	-	-	-	-	-	-	-	-	-	-	-	-	-	-	-	-	-	-	-	-	-	-	-	-	-	-	-	-	-	-	-	-	-	-	-	-	-	-	-	-	-	-
Ab2	-1	0	0	0	-	-	-	-	-	-	-	-	-	-	-	-	-	-	-	-	-	-	-	-	-	-	-	-	-	-	-	-	-	-	-	-	-	-	-	-	-	T	A	A	C	C	A	G	G
Ab3	-1	0	0	0	-	-	-	-	-	-	-	-	-	-	-	-	-	-	-	-	-	-	-	-	-	-	-	-	-	-	-	-	-	-	-	-	-	-	-	-	-	-	-	-	-	-	-	-	-
Ab4	-1	0	0	0	-	-	-	-	-	-	-	-	-	-	-	-	-	-	-	-	-	-	-	-	-	-	-	-	-	-	-	-	-	-	-	-	-	-	-	-	-	-	-	-	-	-	-	-	-
Ab6	-1	0	0	0	-	-	-	-	-	-	-	-	-	-	-	-	-	-	-	-	-	-	-	-	-	-	-	-	-	-	-	-	-	-	-	-	-	-	-	-	-	-	-	-	-	-	-	-	-
Ab7	-1	0	0	0	-	-	-	-	-	-	-	-	-	-	-	-	-	-	-	-	-	-	-	-	-	-	-	-	-	-	-	-	-	-	-	-	-	-	-	-	-	T	T	A	A	A	A	G	G
Ab8	-1	0	0	0	-	-	-	-	-	-	-	-	-	-	-	-	-	-	-	-	-	-	-	-	-	-	-	-	-	-	-	-	-	-	-	-	-	-	-	-	-	-	A	A	C	C	M	R	G
Ab9	-1	0	0	0	-	-	-	-	-	-	-	-	-	-	-	-	-	-	-	-	-	-	-	-	-	-	-	-	-	-	-	-	-	-	-	-	-	-	-	-	C	T	A	A	C	C	A	G	G
Ab10	-1	0	0	0	A	C	C	G	C	C	G	G	S	G	G	M	C	T	G	C	C	C	A	A	C	C	C	C	A	A	C	C	T	T	Y	T	T	T	T	T	C	T	A	A	C	C	A	G	G
Ab11	-1	0	0	0	-	-	-	-	-	-	-	-	-	-	-	-	-	-	-	-	-	-	-	-	-	-	-	-	-	-	-	-	-	-	-	-	-	-	-	-	-	-	-	-	-	-	-	-	-
Ab12	-1	0	0	0	-	-	-	-	-	-	-	-	-	-	-	-	-	-	-	-	-	-	-	-	-	-	-	-	-	-	-	-	-	-	-	-	-	-	-	-	-	-	-	-	-	-	-	-	-
Ab13	-1	0	0	0	-	-	-	-	-	-	-	-	-	-	-	-	-	-	-	-	-	-	-	-	-	-	-	-	-	-	-	-	-	-	-	-	-	-	-	-	-	-	-	-	-	-	-	-	-
Ab14	-1	0	0	0	-	-	-	-	-	-	-	-	-	-	-	-	-	-	-	-	-	-	-	-	-	-	-	-	-	-	-	-	-	-	-	-	-	-	-	-	-	-	-	-	-	-	-	-	-
G16	-1	0	0	0	-	-	-	-	-	-	-	-	-	-	-	-	-	-	-	-	-	-	-	-	-	-	-	-	-	-	-	-	-	-	-	-	-	-	-	T	T	T	A	A	C	C	A	G	G
G17	-1	0	0	0	-	-	-	-	-	-	-	-	-	-	-	-	-	-	-	-	-	-	-	-	-	-	-	-	-	-	-	-	-	-	-	-	-	-	-	-	-	-	-	-	-	-	-	-	-
Ab19	-1	0	0	0	-	C	G	G	S	C	G	G	M	G	G	S	C	T	G	Y	C	C	A	A	C	C	C	C	A	A	M	C	T	T	T	T	T	T	-	-	-	T	A	A	C	C	A	R	G
Ab20	-1	0	0	0	-	-	-	-	-	-	-	-	-	-	-	-	-	-	-	-	-	-	-	-	-	-	-	-	-	-	-	-	-	-	-	-	-	-	-	T	T	T	A	A	C	C	A	A	G
Ab21	-1	0	0	0	-	-	-	-	-	-	-	-	-	-	-	-	-	-	-	-	-	-	-	-	-	-	-	-	-	-	-	-	-	-	-	-	-	-	-	-	-	-	-	-	-	-	-	-	-
B22	-1	0	0	0	-	-	-	-	-	-	-	-	-	-	-	-	-	-	-	-	-	-	-	-	-	-	-	-	-	-	-	-	-	-	-	-	-	-	-	T	T	W	A	A	C	C	M	R	G
B24	-1	0	0	0	-	-	-	-	-	-	-	-	-	-	-	-	-	-	-	-	-	-	-	-	-	-	-	-	-	-	-	-	-	-	-	-	-	-	T	T	T	T	A	A	C	C	A	G	G
B25	-1	0	0	0	-	-	-	-	-	-	-	-	-	-	-	-	-	-	-	-	-	-	-	-	-	-	-	-	-	-	-	-	-	-	-	-	-	-	-	-	-	T	A	A	C	C	A	G	G
B26	-1	0	0	0	-	-	-	-	-	-	-	-	-	-	-	-	-	-	-	-	-	-	-	-	-	-	-	-	-	-	-	-	-	-	-	-	-	-	-	-	-	T	A	A	C	C	A	G	G
B27	-1	0	0	0	-	-	-	-	-	-	-	-	-	-	-	-	-	-	-	-	-	-	-	-	-	-	-	-	-	-	-	-	-	-	-	-	-	-	-	-	-	T	A	A	C	C	A	G	G
B28	-1	0	0	0	-	-	-	-	-	-	-	-	-	-	-	-	-	-	-	-	-	-	-	-	-	-	-	-	-	-	-	-	-	-	-	-	-	-	-	-	-	T	A	A	C	C	A	G	G
B29	-1	0	0	0	-	-	-	-	-	-	-	-	-	-	-	-	-	-	-	-	-	-	-	-	-	-	-	-	-	-	-	-	-	-	-	-	-	-	T	T	T	T	A	A	C	C	A	G	G
B30	-1	0	0	0	-	-	-	-	-	-	-	-	-	-	-	-	-	-	-	-	-	-	-	-	-	-	-	-	-	-	-	-	-	-	-	-	-	-	-	T	T	T	A	A	C	C	G	G	G
B32	-1	0	0	0	-	-	-	-	-	-	-	-	-	-	-	-	-	-	-	-	-	-	-	-	-	-	-	-	-	-	-	-	-	-	-	-	-	-	C	T	T	T	A	A	C	C	A	G	G
B33	-1	0	0	0	-	-	-	-	-	-	-	-	-	-	-	-	-	-	-	-	-	-	-	-	-	-	-	-	-	-	-	-	-	-	-	-	-	-	T	T	C	T	A	A	C	C	A	G	G
B34	-1	0	0	0	-	-	-	-	-	-	-	-	-	-	-	-	-	-	-	-	-	-	-	-	-	-	-	-	-	-	-	-	-	-	-	-	-	-	-	-	Y	T	A	A	C	C	A	G	G
B35	-1	0	0	0	-	-	-	-	-	-	-	-	-	-	-	-	-	-	-	-	-	-	-	-	-	-	-	-	-	-	-	-	-	-	-	-	-	-	-	-	C	C	C	C	C	C	T	G	-
B36	-1	0	0	0	-	-	-	-	-	-	-	-	-	-	-	-	-	-	-	-	-	-	-	-	-	-	-	-	-	-	-	-	-	-	-	-	-	-	-	-	T	T	A	A	C	C	A	G	G
B37	-1	0	0	0	-	-	-	-	-	-	-	-	-	-	-	-	-	-	-	-	-	-	-	-	-	-	-	-	-	-	-	-	-	-	-	-	-	-	T	T	C	T	A	A	C	C	A	G	G
B38	-1	0	0	0	-	-	-	-	-	-	-	-	-	-	-	-	-	-	-	-	-	-	-	-	-	-	-	-	-	-	-	-	-	-	-	-	-	-	-	-	-	T	A	A	C	C	A	G	G
B39	-1	0	0	0	-	-	-	-	-	-	-	-	-	-	-	-	-	-	-	-	-	-	-	-	-	-	-	-	-	-	-	-	-	-	-	-	-	-	A	C	A	S	T	G	A	A	-	-	-
B41	-1	0	0	0	-	-	-	-	-	-	-	-	-	-	-	-	-	-	-	-	-	-	-	-	-	-	-	-	-	-	-	-	-	-	-	-	-	-	-	-	-	-	A	A	C	C	A	G	G
B42	-1	0	0	0	-	-	-	-	-	-	-	-	-	-	-	-	-	-	-	-	-	-	-	-	-	-	-	-	-	-	-	-	-	-	-	-	-	-	T	T	T	T	A	A	C	C	A	G	G
B43	-1	0	0	0	-	-	-	-	-	-	-	-	-	-	-	-	-	-	-	-	-	-	-	-	-	-	-	-	-	-	-	-	-	-	-	-	-	-	T	T	T	T	A	A	C	C	A	G	G
B44	-1	0	0	0	-	-	-	-	-	-	-	-	-	-	-	-	-	-	-	-	-	-	-	-	-	-	-	-	-	-	-	-	-	-	-	-	-	-	-	T	T	T	A	A	C	C	A	G	G
D48	-1	0	0	0	-	-	-	-	-	-	-	-	-	-	-	-	-	-	-	-	-	-	-	-	-	-	-	-	-	-	-	-	-	-	-	-	-	-	-	T	T	T	A	A	C	C	A	G	G
D49	-1	0	0	0	-	-	-	-	-	-	-	-	-	-	-	-	-	-	-	-	-	-	-	-	-	-	-	-	-	-	-	-	-	-	-	-	-	-	T	T	T	T	A	A	C	C	A	G	G
D50	-1	0	0	0	-	-	-	-	-	-	-	-	-	-	-	-	-	-	-	-	-	-	-	-	-	-	-	-	-	-	-	-	-	-	-	-	-	-	T	T	T	T	A	A	C	C	A	G	G
D51	-1	0	0	0	-	-	-	-	-	-	-	-	-	-	-	-	-	-	-	-	-	-	-	-	-	-	-	-	-	-	-	-	-	-	-	-	-	-	T	T	T	A	A	A	A	G	-	-	G
D52	-1	0	0	0	-	-	-	-	-	-	-	-	-	-	-	-	-	-	-	-	-	-	-	-	-	-	-	-	-	-	-	-	-	-	-	-	-	-	T	T	T	T	A	A	C	C	A	G	G
D53	-1	0	0	0	-	-	-	-	-	-	-	-	-	-	-	-	-	-	-	-	-	-	-	-	-	-	-	-	-	-	-	-	-	-	-	-	-	-	T	T	T	T	A	A	C	C	A	G	G
D54	-1	0	0	0	-	-	-	-	-	-	-	-	-	-	-	-	-	-	-	-	-	-	-	-	-	-	-	-	-	-	-	-	-	-	-	-	-	-	T	T	T	T	A	A	C	C	A	G	G
D55	-1	0	0	0	-	-	-	-	-	-	-	-	-	-	-	-	-	-	-	-	-	-	-	-	-	-	-	-	-	-	-	-	-	-	-	-	-	-	-	-	-	-	-	-	-	-	-	-	-
D56	-1	0	0	0	-	-	-	-	-	-	-	-	-	-	-	-	-	-	-	-	-	-	-	-	-	-	-	-	-	-	-	-	-	-	-	-	-	-	T	T	T	T	A	A	C	C	C	C	G
E57	-1	0	0	0	-	-	-	-	-	-	-	-	-	-	-	-	-	-	-	-	-	-	-	-	-	-	-	-	-	-	-	-	-	-	-	-	-	-	T	T	T	T	A	A	C	C	A	G	G
E58	-1	0	0	0	-	-	-	-	-	-	-	-	-	-	-	-	-	-	-	-	-	-	-	-	-	-	-	-	-	-	-	-	-	-	-	-	-	-	T	T	T	T	A	A	C	C	A	G	G
F59	-1	0	0	0	-	-	-	-	-	-	-	-	-	-	-	-	-	-	-	-	-	-	-	-	-	-	-	-	-	-	-	-	-	-	-	-	-	-	C	T	T	T	A	A	C	C	-	-	-
F60	-1	0	0	0	-	-	-	-	-	-	-	-	-	-	-	-	-	-	-	-	-	-	-	-	-	-	-	-	-	-	-	-	-	-	-	-	-	-	C	T	T	T	A	A	C	C	A	G	G
F61	-1	0	0	0	-	-	-	-	-	-	-	-	-	-	-	-	-	-	-	-	-	-	-	-	-	-	-	-	-	-	-	-	-	-	-	-	-	-	T	T	T	T	A	A	C	C	A	G	G
F62	-1	0	0	0	-	-	-	-	-	-	-	-	-	-	-	-	-	-	-	-	-	-	-	-	-	-	-	-	-	-	-	-	-	-	-	-	-	-	-	-	C	G	A	A	A	G	A	A	T
F63	-1	0	0	0	-	-	-	-	-	-	-	-	-	-	-	-	-	-	-	-	-	-	-	-	-	-	-	-	-	-	-	-	-	-	-	-	-	-	T	T	T	T	A	A	C	C	A	G	G
G64	-1	0	0	0	-	-	-	-	-	-	-	-	-	-	-	-	-	-	-	-	-	-	-	-	-	-	-	-	-	-	-	-	-	-	-	-	-	-	T	T	T	T	A	A	C	C	A	G	G
G65	-1	0	0	0	-	-	-	-	-	-	-	-	-	-	-	-	-	-	-	-	-	-	-	-	-	-	-	-	-	-	-	-	-	-	-	-	-	-	-	-	-	-	-	-	-	-	-	-	-
G66	-1	0	0	0	-	-	-	-	-	-	-	-	-	-	-	-	-	-	-	-	-	-	-	-	-	-	-	-	-	-	-	-	-	-	-	-	-	-	T	T	C	T	A	A	C	C	A	G	G
G67	-1	0	0	0	-	-	-	-	-	-	-	-	-	-	-	-	-	-	-	-	-	-	-	-	-	-	-	-	-	-	-	-	-	-	-	-	-	-	T	T	C	T	C	T	T	C	A	A	C
G68	-1	0	0	0	-	-	-	-	-	-	-	-	-	-	-	-	-	-	-	-	-	-	-	-	-	-	-	-	-	-	-	-	-	-	-	-	-	-	T	T	T	T	A	A	C	C	A	G	G
G69	-1	0	0	0	-	-	-	-	-	-	-	-	-	-	-	-	-	-	-	-	-	-	-	-	-	-	-	-	-	-	-	-	-	-	-	-	-	-	T	T	C	T	A	A	C	C	A	G	G
G70	-1	0	0	0	-	-	-	-	-	-	-	-	-	-	-	-	-	-	-	-	-	-	-	-	-	-	-	-	-	-	-	-	-	-	-	-	-	-	T	T	T	T	A	A	C	C	A	G	G
J74	-1	0	0	0	-	-	-	-	-	-	-	-	-	-	-	-	-	-	-	-	-	-	-	-	-	-	-	-	-	-	-	-	-	-	-	-	-	-	T	T	T	T	A	A	C	C	A	G	G
J76	-1	0	0	0	-	-	-	-	-	-	-	-	-	-	-	-	-	-	-	-	-	-	-	-	-	-	-	-	-	-	-	-	-	-	-	-	-	-	T	T	T	T	A	A	C	C	A	G	G
J77	-1	0	0	0	-	-	-	-	-	-	-	-	-	-	-	-	-	-	-	-	-	-	-	-	-	-	-	-	-	-	-	-	-	-	-	-	-	-	T	T	T	T	A	A	C	C	A	G	G
J78	-1	0	0	0	-	-	-	-	-	-	-	-	-	-	-	-	-	-	-	-	-	-	-	-	-	-	-	-	-	-	-	-	-	-	-	-	-	-	-	-	-	T	C	A	C	C	A	A	G
J79	-1	0	0	0	-	-	-	-	-	-	-	-	-	-	-	-	-	-	-	-	-	-	-	-	-	-	-	-	-	-	-	-	-	-	-	-	-	T	T	T	T	A	A	A	C	C	A	G	G
J80	-1	0	0	0	-	-	-	-	-	-	-	-	-	-	-	-	-	-	-	-	-	-	-	-	-	-	-	-	-	-	-	-	-	-	-	-	-	-	T	T	T	T	A	A	C	C	A	G	G
J81	-1	0	0	0	-	-	-	-	-	-	-	-	-	-	-	-	-	-	-	-	-	-	-	-	-	-	-	-	-	-	-	-	-	-	-	-	-	-	-	-	-	-	A	A	C	C	A	A	G
J82	-1	0	0	0	-	-	-	-	-	-	-	-	-	-	-	-	-	-	-	-	-	-	-	-	-	-	-	-	-	-	-	-	-	-	-	-	-	-	T	T	T	T	A	A	C	C	A	G	G
J83	-1	0	0	0	-	-	-	-	-	-	-	-	-	-	-	-	-	-	-	-	-	-	-	-	-	-	-	-	-	-	-	-	-	-	-	-	-	-	T	T	C	T	A	A	C	C	A	G	G
J84	-1	0	0	0	-	-	-	-	-	-	-	-	-	-	-	-	-	-	-	-	-	-	-	-	-	-	-	-	-	-	-	-	-	-	-	-	-	-	T	T	C	T	A	A	C	C	A	G	G
J85	-1	0	0	0	-	-	-	-	-	-	-	-	-	-	-	-	-	-	-	-	-	-	-	-	-	-	-	-	-	-	-	-	-	-	-	-	-	-	-	-	T	T	A	A	C	C	A	G	G
F86	-1	0	0	0	-	-	-	-	-	-	-	-	-	-	-	-	-	-	-	-	-	-	-	-	-	-	-	-	-	-	-	-	-	-	-	-	-	-	C	T	T	T	A	A	C	C	A	G	G
KU855474.1	-1	0	0	0	-	-	-	-	-	-	-	-	-	-	-	-	-	-	-	-	-	-	-	-	-	-	-	-	-	-	-	-	-	-	-	-	-	-	-	-	-	-	-	-	-	-	-	-	-
	1	1	1	1	1	1	1	1	1	1	1	1	1	1	1	1	1	1	1	1	1	1	1	1	1	1	1	1	1	1	1	1	1	1	1	1	1	1	1	1	1	1	1	1	1	1	1	1	1
	0	0	0	0	0	0	0	1	1	1	1	1	1	1	1	1	1	1	1	1	1	1	1	1	1	1	1	1	1	1	1	1	1	1	1	1	1	1	1	1	1	1	1	1	1	1	1	1	1
	9	9	9	9	9	9	9	0	0	0	0	0	0	0	0	0	0	1	1	1	1	1	1	1	1	1	1	2	2	2	2	2	2	2	2	2	2	3	3	3	3	3	3	3	3	3	3	4	4
	3	4	5	6	7	8	9	0	1	2	3	4	5	6	7	8	9	0	1	2	3	4	5	6	7	8	9	0	1	2	3	4	5	6	7	8	9	0	1	2	3	4	5	6	7	8	9	0	1
Ab1	-1	0	0	0	-	-	-	-	-	-	-	-	-	-	-	-	-	-	-	-	-	-	-	-	-	-	-	-	-	-	-	-	-	-	-	-	-	-	-	-	-	-	-	-	-	-	-	-	-
Ab2	-1	0	0	0	A	T	T	T	A	-	-	-	-	-	-	-	-	-	-	-	-	-	-	-	-	C	C	T	C	G	G	A	T	C	A	G	G	K	A	R	G	G	A	A	R	S	A	W	T
Ab3	-1	0	0	0	-	-	-	-	-	-	-	-	-	-	-	-	-	-	-	-	-	-	-	-	-	-	-	-	-	-	-	-	-	-	-	-	-	-	-	-	-	-	-	-	-	-	-	-	-
Ab4	-1	0	0	0	-	-	-	-	-	-	-	-	-	-	-	-	-	-	-	-	-	-	-	-	-	-	-	-	-	-	-	-	-	-	-	-	-	-	-	-	-	-	-	-	-	-	-	-	-
Ab6	-1	0	0	0	-	-	-	-	-	-	-	-	-	-	-	-	-	-	-	-	-	-	-	-	-	-	-	-	-	-	-	-	-	-	-	-	-	-	-	-	-	-	-	-	-	-	-	-	-
Ab7	-1	0	0	0	T	T	T	T	A	-	-	-	-	-	-	-	-	-	-	-	-	-	-	-	-	-	-	-	-	-	-	A	T	C	C	C	T	A	A	T	T	T	W	A	W	Y	A	A	A
Ab8	-1	0	0	0	A	T	T	T	A	A	A	M	A	T	A	-	-	-	-	-	-	-	-	-	-	-	A	R	A	-	-	-	-	-	-	-	-	-	-	-	-	-	-	-	-	-	-	-	-
Ab9	-1	0	0	0	A	T	T	T	A	A	A	A	A	T	A	-	-	-	-	-	-	-	-	-	-	-	A	A	-	-	-	-	-	-	-	-	-	-	-	-	-	-	-	-	-	-	-	-	-
Ab10	-1	0	0	0	A	K	T	T	W	-	-	-	-	-	-	-	-	-	-	-	-	-	-	-	-	A	A	G	A	T	T	T	K	A	A	-	-	-	-	-	-	-	-	-	-	-	-	-	-
Ab11	-1	0	0	0	-	-	-	-	-	-	-	-	-	-	-	-	-	-	-	-	-	-	-	-	-	-	-	-	-	-	-	-	-	-	-	-	-	-	-	-	-	-	-	-	-	-	-	-	-
Ab12	-1	0	0	0	-	-	-	-	-	-	-	-	-	-	-	-	-	-	-	-	-	-	-	-	-	-	-	-	-	-	-	-	-	-	-	-	-	-	-	-	-	-	-	-	-	-	-	-	-
Ab13	-1	0	0	0	-	-	-	-	-	-	-	-	-	-	-	-	-	-	-	-	-	-	-	-	-	-	-	-	-	-	-	-	-	-	-	-	-	-	-	-	-	-	-	-	-	-	-	-	-
Ab14	-1	0	0	0	-	-	-	-	-	-	-	-	-	-	-	-	-	-	-	-	-	-	-	-	-	-	-	-	-	-	-	-	-	-	-	-	-	-	-	-	-	-	-	-	-	-	-	-	-
G16	-1	0	0	0	A	T	T	T	A	A	G	C	-	-	-	-	A	T	A	C	A	K	G	T	A	G	G	G	A	T	A	C	C	C	G	C	T	G	A	A	T	T	T	-	A	A	G	C	A
G17	-1	0	0	0	-	-	-	-	-	-	-	-	-	-	-	-	-	-	-	-	-	-	-	-	-	-	-	-	-	-	-	-	-	-	-	-	-	-	-	-	-	-	-	-	-	-	-	-	-
Ab19	-1	0	0	0	A	G	T	T	T	-	-	-	-	-	-	-	-	-	-	-	-	-	-	-	-	T	A	A	G	A	T	T	G	S	A	A	A	A	-	-	-	-	-	-	-	-	-	-	-
Ab20	-1	0	0	0	G	T	T	T	A	-	-	-	-	-	-	-	-	-	-	-	-	-	A	G	A	G	G	G	G	A	C	C	C	G	G	T	T	G	A	G	T	T	T	-	A	A	G	A	T
Ab21	-1	0	0	0	-	-	-	-	-	-	-	-	-	-	-	-	-	-	-	-	-	-	-	-	-	-	-	-	-	-	-	-	-	-	-	-	-	-	-	-	-	-	-	-	-	-	-	-	-
B22	-1	0	0	0	G	T	T	T	A	-	-	-	-	-	-	-	-	-	-	-	-	-	-	-	-	-	-	-	G	A	G	A	T	-	-	-	T	A	A	G	A	T	T	A	A	-	-	-	-
B24	-1	0	0	0	A	T	C	A	G	-	-	-	-	-	-	-	-	-	-	-	-	-	G	T	A	G	G	G	A	T	A	C	C	C	G	C	T	G	A	A	K	T	T	-	A	A	R	S	M
B25	-1	0	0	0	A	T	W	T	A	-	-	-	-	-	-	-	-	-	-	-	-	-	-	-	-	A	A	A	G	A	A	W	C	C	G	C	T	G	A	A	T	W	T	A	A	A	A	S	A
B26	-1	0	0	0	A	T	T	T	A	-	-	-	-	-	-	-	-	-	-	-	-	-	-	-	-	A	A	A	G	T	A	T	A	T	R	-	T	A	A	A	A	G	T	A	T	A	A	A	A
B27	-1	0	0	0	A	T	T	T	A	-	-	-	-	-	-	-	-	-	-	-	-	-	-	-	-	A	A	A	G	C	-	-	C	C	G	C	T	G	A	A	K	T	T	A	A	A	A	G	A
B28	-1	0	0	0	A	T	T	T	A	-	-	-	-	-	-	-	-	-	-	-	-	-	-	-	-	A	A	G	A	T	T	T	A	A	A	G	A	T	T	A	A	A	A	-	-	-	-	-	-
B29	-1	0	0	0	A	T	C	T	C	-	-	-	-	-	-	G	G	A	T	C	A	G	G	T	A	G	G	G	A	T	A	C	C	C	G	C	T	G	A	W	T	T	T	-	A	R	G	M	A
B30	-1	0	0	0	A	T	A	T	A	-	-	-	-	-	-	-	-	-	-	-	-	-	-	-	-	-	-	-	A	A	C	A	T	A	G	G	T	A	A	A	C	A	T	A	G	G	-	-	-
B32	-1	0	0	0	-	A	T	T	T	-	-	-	-	-	-	-	-	-	-	-	-	-	-	-	A	A	G	C	A	T	A	A	-	-	-	-	T	-	-	-	-	T	T	-	A	A	G	C	A
B33	-1	0	0	0	A	T	T	T	A	-	-	-	-	-	-	-	-	-	-	-	-	-	-	-	A	G	C	A	T	A	A	-	-	-	G	C	T	G	A	A	T	T	T	-	A	A	G	C	A
B34	-1	0	0	0	A	T	T	T	A	-	-	-	-	-	-	-	-	-	-	-	-	-	-	-	-	-	-	-	A	G	A	A	T	A	A	S	T	W	A	A	T	T	T	A	A	R	M	R	T
B35	-1	0	0	0	A	T	T	T	A	-	-	-	-	-	-	-	-	-	-	-	-	-	-	-	-	-	-	-	A	A	C	A	T	A	A	A	A	A	A	R	C	A	T	A	A	A	A	-	-
B36	-1	0	0	0	A	T	T	T	A	-	-	-	-	-	-	-	-	-	-	-	-	-	-	-	-	-	A	A	C	A	A	C	C	C	K	C	T	K	A	A	T	T	T	-	A	A	W	C	A
B37	-1	0	0	0	R	T	T	T	A	-	-	-	-	-	-	-	-	-	-	-	-	-	-	-	-	-	A	G	C	A	T	A	A	A	A	C	T	G	A	R	T	T	T	-	A	A	G	C	A
B38	-1	0	0	0	A	T	T	T	A	-	-	-	-	-	-	-	-	-	-	-	-	-	-	-	-	-	-	-	-	-	-	-	-	A	G	C	A	T	A	A	T	T	T	-	A	A	R	Y	A
B39	-1	0	0	0	-	-	-	-	-	-	-	-	-	-	-	A	A	T	T	T	A	A	G	C	A	-	-	-	-	-	-	T	A	-	A	T	T	A	A	G	Y	A	T	-	A	A	-	-	-
B41	-1	0	0	0	A	T	T	T	A	A	G	C	A	T	A	T	T	-	-	-	-	-	-	-	-	-	W	A	A	K	Y	A	T	A	A	A	T	A	A	-	-	-	-	-	-	-	-	-	-
B42	-1	0	0	0	A	T	T	T	T	-	-	-	-	-	-	-	-	-	-	-	-	-	-	-	T	A	C	C	-	-	-	-	-	C	G	C	T	G	A	A	T	T	T	T	A	A	G	C	W
B43	-1	0	0	0	A	T	T	A	-	-	-	-	-	-	-	-	-	-	-	-	-	-	-	-	-	-	-	-	A	A	A	A	C	-	R	M	T	R	A	W	T	T	A	-	A	A	A	A	A
B44	-1	0	0	0	A	T	T	T	A	-	-	-	-	-	-	-	-	-	-	-	-	-	-	-	A	G	C	A	T	C	-	-	-	C	G	C	T	G	A	A	T	T	T	-	A	A	G	C	A
D48	-1	0	0	0	A	T	T	T	-	-	-	-	-	-	-	-	-	-	-	-	-	-	-	-	-	A	C	C	-	-	-	-	-	C	G	C	T	G	A	A	T	T	T	-	A	A	G	C	A
D49	-1	0	0	0	A	T	T	T	A	-	-	-	-	-	-	-	-	-	-	-	-	-	-	-	-	-	-	-	-	-	-	-	-	-	A	G	T	G	A	A	T	T	W	-	A	A	R	M	A
D50	-1	0	0	0	A	T	T	T	A	-	-	-	-	-	-	A	G	-	-	-	-	-	-	-	-	-	-	-	A	T	A	C	C	C	G	C	T	G	A	A	T	T	T	-	A	A	K	M	A
D51	-1	0	0	0	-	-	-	-	-	-	-	-	-	-	-	A	A	T	T	T	A	A	G	A	A	-	-	-	-	-	-	T	C	C	G	C	T	G	A	A	T	T	T	-	A	A	G	M	A
D52	-1	0	0	0	A	T	T	T	-	-	-	-	-	-	-	-	-	-	-	-	-	-	-	-	-	-	G	G	A	T	A	C	C	C	G	C	T	G	A	A	T	T	T	-	A	A	G	C	A
D53	-1	0	0	0	-	A	T	T	T	-	-	-	-	-	-	-	-	-	-	-	-	-	-	-	A	A	G	C	C	C	G	Y	-	-	-	-	T	S	A	A	T	T	T	-	A	A	R	C	A
D54	-1	0	0	0	-	A	T	T	T	-	-	-	-	-	-	-	-	-	-	-	-	-	-	-	A	A	G	C	C	C	G	Y	-	-	-	-	T	S	A	A	T	T	T	-	A	A	R	C	A
D55	-1	0	0	0	-	-	-	-	-	-	-	-	-	-	-	-	-	-	-	-	-	-	-	-	-	-	-	-	-	-	-	-	-	-	-	-	-	-	-	-	-	-	-	-	-	-	-	-	-
D56	-1	0	0	0	-	-	-	-	-	-	-	-	-	-	-	A	A	T	T	T	A	A	C	-	-	-	-	-	-	-	-	C	C	C	G	C	T	G	A	A	T	T	T	-	A	A	C	C	R
E57	-1	0	0	0	A	T	T	T	-	-	-	-	-	-	-	-	-	-	-	-	-	-	-	-	-	-	-	-	-	-	-	C	C	C	G	C	T	G	A	A	T	T	T	-	A	A	G	C	A
E58	-1	0	0	0	A	T	T	T	A	-	-	-	-	-	-	A	A	T	C	-	A	G	G	T	A	G	G	G	A	T	A	C	C	C	G	C	T	G	A	A	T	T	T	-	A	A	G	M	A
F59	-1	0	0	0	-	-	-	-	-	-	-	-	-	-	-	-	-	-	-	-	-	-	-	-	-	-	-	-	-	-	-	-	-	-	-	-	-	-	-	-	-	-	-	-	-	-	-	-	-
F60	-1	0	0	0	A	T	T	A	S	-	-	-	-	-	-	-	-	-	-	-	-	-	-	-	-	-	G	G	A	T	A	C	C	C	K	C	T	R	A	A	T	T	T	-	A	A	K	C	A
F61	-1	0	0	0	-	-	-	-	-	-	-	-	-	-	-	G	G	A	T	C	A	G	G	T	A	G	G	G	A	T	A	C	C	C	G	C	T	G	A	A	T	T	T	-	A	A	G	Y	T
F62	-1	0	0	0	A	T	T	T	A	-	-	-	-	-	-	-	-	-	-	-	-	-	-	-	-	-	-	-	-	T	A	C	C	C	G	C	T	G	A	A	T	T	T	-	A	A	G	C	A
F63	-1	0	0	0	-	-	-	-	-	-	-	-	-	-	-	-	-	-	-	-	-	G	G	T	A	G	G	G	A	T	A	C	C	C	G	C	T	G	A	A	T	T	T	-	A	A	G	C	A
G64	-1	0	0	0	A	T	T	T	A	-	-	-	-	-	-	A	G	G	-	-	-	-	-	T	A	G	G	G	A	T	A	C	C	C	G	Y	T	G	A	R	T	T	T	-	A	A	G	M	A
G65	-1	0	0	0	-	-	-	-	-	-	-	-	-	-	-	-	-	-	-	-	-	-	-	-	-	-	-	-	-	-	-	-	-	-	-	-	-	-	-	-	-	-	-	-	-	-	-	-	-
G66	-1	0	0	0	C	A	G	G	T	-	-	-	-	-	-	-	-	-	-	-	-	-	-	-	A	G	G	G	A	T	A	C	C	C	G	C	T	G	A	A	T	T	T	-	A	A	G	C	A
G67	-1	0	0	0	-	-	-	-	-	-	-	-	-	-	-	-	-	-	-	-	-	-	-	-	-	-	-	-	-	-	-	-	-	-	-	-	-	-	-	-	-	-	-	-	-	-	-	-	-
G68	-1	0	0	0	C	G	G	A	-	-	-	-	-	-	-	-	-	-	-	-	-	-	-	-	-	-	-	-	T	C	A	G	G	W	A	G	G	G	A	T	A	C	C	-	C	G	Y	T	R
G69	-1	0	0	0	A	T	T	T	A	-	-	-	-	-	-	-	-	-	-	-	-	-	-	-	A	G	C	A	T	A	A	-	-	-	G	C	T	G	A	A	T	T	T	-	A	A	G	C	A
G70	-1	0	0	0	A	T	T	T	-	-	-	-	-	-	-	-	-	-	-	-	-	-	-	-	-	-	-	-	A	A	G	C	C	T	G	C	T	G	A	A	W	T	T	-	A	A	K	C	A
J74	-1	0	0	0	-	-	-	-	-	-	-	-	-	-	-	A	A	T	T	T	A	A	C	C	A	-	-	G	A	T	A	C	C	C	G	C	T	G	A	R	T	T	T	-	A	A	S	C	A
J76	-1	0	0	0	A	T	T	T	A	-	-	-	-	-	-	A	G	C	-	-	-	-	-	-	-	-	-	-	A	T	A	A	C	-	G	C	T	G	A	A	T	T	T	-	A	A	G	C	A
J77	-1	0	0	0	A	T	-	-	-	-	-	-	-	-	-	-	-	-	-	-	-	-	G	T	A	G	G	G	A	T	A	C	C	C	G	C	T	G	A	A	T	T	T	-	A	A	G	C	A
J78	-1	0	0	0	A	T	T	T	A	-	-	-	-	-	-	-	-	-	-	-	-	-	-	-	A	G	G	G	A	T	A	C	C	C	S	C	T	A	A	A	T	T	T	-	A	A	R	C	A
J79	-1	0	0	0	A	T	T	A	A	-	-	-	-	-	-	-	-	-	-	-	-	-	-	-	-	A	A	R	A	W	A	C	C	C	S	Y	W	A	A	A	T	W	W	A	A	A	M	A	W
J80	-1	0	0	0	A	T	T	T	A	A	G	C	A	T	A	A	G	A	T	C	A	G	G	T	A	G	G	G	A	T	A	C	C	C	G	C	T	G	A	R	T	T	T	-	A	A	G	C	A
J81	-1	0	0	0	A	T	T	T	A	A	T	T	A	A	A	-	-	-	-	-	-	-	-	-	-	-	A	A	A	T	A	A	C	A	A	T	T	T	A	A	K	Y	A	A	A	A	M	A	T
J82	-1	0	0	0	A	T	T	T	A	-	-	-	-	-	-	-	-	-	-	-	-	-	-	-	A	G	G	G	A	T	A	C	C	C	G	C	T	G	A	A	T	T	T	-	A	A	G	C	A
J83	-1	0	0	0	A	T	T	T	A	-	-	-	-	-	-	-	-	-	-	-	-	-	-	-	A	G	C	A	T	A	A	C	C	C	G	C	T	G	A	A	T	T	T	-	A	A	G	C	A
J84	-1	0	0	0	R	T	T	T	A	-	-	-	-	-	-	-	-	-	-	-	-	-	-	-	A	G	C	A	T	A	A	C	-	-	G	C	T	G	A	R	T	T	T	-	A	A	G	C	A
J85	-1	0	0	0	-	A	T	T	T	-	-	-	-	-	-	-	-	-	-	-	-	-	-	-	A	A	G	C	A	T	A	A	-	-	-	-	T	G	A	A	T	T	T	-	A	A	G	C	A
F86	-1	0	0	0	A	T	T	T	A	-	-	-	-	-	-	-	-	-	-	-	-	-	-	-	A	G	C	A	T	A	A	-	-	C	G	C	T	G	A	A	T	T	T	-	A	A	G	C	A
KU855474.1	-1	0	0	0	-	-	-	-	-	-	-	-	-	-	-	-	-	-	-	-	-	-	-	-	-	-	-	-	-	-	-	-	-	-	-	-	-	-	-	-	-	-	-	-	-	-	-	-	-
	1	1	1	1
	1	1	1	1
	7	7	7	7
	1	2	3	4
Ab1	-1	0	0	0	-	-	-	-
Ab2	-1	0	0	0	-	-	-	-
Ab3	-1	0	0	0	-	-	-	-
Ab4	-1	0	0	0	-	-	-	-
Ab6	-1	0	0	0	-	-	-	-
Ab7	-1	0	0	0	-	-	-	-
Ab8	-1	0	0	0	-	-	-	-
Ab9	-1	0	0	0	-	-	-	-
Ab10	-1	0	0	0	-	-	-	-
Ab11	-1	0	0	0	-	-	-	-
Ab12	-1	0	0	0	-	-	-	-
Ab13	-1	0	0	0	-	-	-	-
Ab14	-1	0	0	0	-	-	-	-
G16	-1	0	0	0	-	-	-	-
G17	-1	0	0	0	-	-	-	-
Ab19	-1	0	0	0	-	-	-	-
Ab20	-1	0	0	0	-	-	-	-
Ab21	-1	0	0	0	-	-	-	-
B22	-1	0	0	0	-	-	-	-
B24	-1	0	0	0	-	-	-	-
B25	-1	0	0	0	-	-	-	-
B26	-1	0	0	0	-	-	-	-
B27	-1	0	0	0	-	-	-	-
B28	-1	0	0	0	-	-	-	-
B29	-1	0	0	0	-	-	-	-
B30	-1	0	0	0	-	-	-	-
B32	-1	0	0	0	-	-	-	-
B33	-1	0	0	0	-	-	-	-
B34	-1	0	0	0	-	-	-	-
B35	-1	0	0	0	-	-	-	-
B36	-1	0	0	0	-	-	-	-
B37	-1	0	0	0	-	-	-	-
B38	-1	0	0	0	-	-	-	-
B39	-1	0	0	0	-	-	-	-
B41	-1	0	0	0	-	-	-	-
B42	-1	0	0	0	-	-	-	-
B43	-1	0	0	0	-	-	-	-
B44	-1	0	0	0	-	-	-	-
D48	-1	0	0	0	-	-	-	-
D49	-1	0	0	0	-	-	-	-
D50	-1	0	0	0	-	-	-	-
D51	-1	0	0	0	-	-	-	-
D52	-1	0	0	0	-	-	-	-
D53	-1	0	0	0	-	-	-	-
D54	-1	0	0	0	-	-	-	-
D55	-1	0	0	0	-	-	-	-
D56	-1	0	0	0	-	-	-	-
E57	-1	0	0	0	-	-	-	-
E58	-1	0	0	0	-	-	-	-
F59	-1	0	0	0	-	-	-	-
F60	-1	0	0	0	T	T	C	T
F61	-1	0	0	0	-	-	-	-
F62	-1	0	0	0	-	-	-	-
F63	-1	0	0	0	-	-	-	-
G64	-1	0	0	0	-	-	-	-
G65	-1	0	0	0	-	-	-	-
G66	-1	0	0	0	-	-	-	-
G67	-1	0	0	0	-	-	-	-
G68	-1	0	0	0	-	-	-	-
G69	-1	0	0	0	-	-	-	-
G70	-1	0	0	0	-	-	-	-
J74	-1	0	0	0	-	-	-	-
J76	-1	0	0	0	-	-	-	-
J77	-1	0	0	0	-	-	-	-
J78	-1	0	0	0	-	-	-	-
J79	-1	0	0	0	-	-	-	-
J80	-1	0	0	0	-	-	-	-
J81	-1	0	0	0	-	-	-	-
J82	-1	0	0	0	-	-	-	-
J83	-1	0	0	0	-	-	-	-
J84	-1	0	0	0	-	-	-	-
J85	-1	0	0	0	-	-	-	-
F86	-1	0	0	0	-	-	-	-
KU855474.1	-1	0	0	0	-	-	-	-
[truncated: 33 more columns]

## Sheet: Conserved sites
Additional file 3
COEFFICIENT OF DIFFERENTIATION SHOWING CONSERVED SITES IN MULTIPLE ALIGNMENTS OF ARTOCARPUS ALTILIS AND ACCESSIONS OF TRECULIA AFRICANA var AFRICANA
Domain: Data Coding Codon Start: 1
										1	1	1	1	1	1	1	1	1	1	2	2	2	2	2	2	2	2	2	2	3	3	3	3	3	3	3	3	3	3	4	4	4	4	4	4	4	4	4	4
	1	2	3	4	5	6	7	8	9	0	1	2	3	4	5	6	7	8	9	0	1	2	3	4	5	6	7	8	9	0	1	2	3	4	5	6	7	8	9	0	1	2	3	4	5	6	7	8	9
Ab1	-1	0	0	0	-	-	-	-	-	-	-	-	-	-	-	-	-	-	-	-	-	-	-	-	-	-	-	-	-	-	-	-	-	-	-	-	-	-	-	-	-	-	-	-	-	-	-	-	-
Ab2	-1	0	0	0	-	-	-	-	-	-	-	-	-	-	-	-	-	-	-	-	-	-	-	-	-	-	-	-	-	-	-	-	-	-	-	-	-	-	-	-	-	-	T	T	T	A	A	C	A
Ab3	-1	0	0	0	-	-	-	-	-	-	-	-	-	-	-	-	-	-	-	-	-	-	-	-	-	-	-	-	-	-	-	-	-	-	-	-	-	-	-	-	-	-	-	-	-	-	-	-	-
Ab4	-1	0	0	0	-	-	-	-	-	-	-	-	-	-	-	-	-	-	-	-	-	-	-	-	-	-	-	-	-	-	-	-	-	-	-	-	-	-	-	-	-	-	-	-	-	-	-	-	-
Ab6	-1	0	0	0	-	-	-	-	-	-	-	-	-	-	-	-	-	-	-	-	-	-	-	-	-	-	-	-	-	-	-	-	-	-	-	-	-	-	-	-	-	-	-	-	-	-	-	-	-
Ab7	-1	0	0	0	-	-	-	-	-	-	-	-	-	-	-	-	-	-	-	-	-	-	-	-	-	-	-	-	-	-	-	-	-	-	-	-	-	-	-	-	-	T	W	W	T	A	A	Y	A
Ab8	-1	0	0	0	-	-	-	-	-	-	-	-	-	-	-	-	-	-	-	-	-	-	-	-	-	-	-	-	-	-	-	-	-	-	-	-	-	-	-	-	-	-	-	-	-	-	-	-	-
Ab9	-1	0	0	0	-	-	-	-	-	-	-	-	-	-	-	-	-	-	-	-	-	-	-	-	-	-	-	-	-	-	-	-	-	-	-	-	-	-	-	-	-	-	-	-	-	-	-	-	-
Ab10	-1	0	0	0	-	-	-	-	-	-	-	-	-	-	-	-	-	-	-	-	-	-	-	-	-	-	-	-	-	-	-	-	-	-	-	-	-	-	-	-	-	-	T	T	M	T	W	C	W
Ab11	-1	0	0	0	-	-	-	-	-	-	-	-	-	-	-	-	-	-	-	-	-	-	-	-	-	-	-	-	-	-	-	-	-	-	-	-	-	-	-	-	-	-	-	-	-	-	-	-	-
Ab12	-1	0	0	0	-	-	-	-	-	-	-	-	-	-	-	-	-	-	-	-	-	-	-	-	-	-	-	-	-	-	-	-	-	-	-	-	-	-	-	-	-	-	-	T	M	T	W	C	A
Ab13	-1	0	0	0	-	-	-	-	-	-	-	-	-	-	-	-	-	-	-	-	-	-	-	-	-	-	-	-	-	-	-	-	-	-	-	-	-	-	-	-	-	-	-	-	-	-	-	-	-
Ab14	-1	0	0	0	-	-	-	-	-	-	-	-	-	-	-	-	-	-	-	-	-	-	-	-	-	-	-	-	-	-	-	-	-	-	-	-	-	-	-	-	-	-	-	-	-	-	-	-	-
G16	-1	0	0	0	-	-	-	-	-	-	-	-	-	-	-	-	-	-	-	-	-	-	-	-	-	-	-	-	-	-	-	-	-	-	-	-	-	-	-	-	-	-	-	-	-	-	-	-	-
G17	-1	0	0	0	-	-	-	-	-	-	-	-	-	-	-	-	-	-	-	-	-	-	-	-	-	-	-	-	-	-	-	-	-	-	-	-	-	-	-	-	-	-	T	T	T	A	A	C	A
Ab19	-1	0	0	0	-	-	-	-	-	-	-	-	-	-	-	-	-	-	-	-	-	-	-	-	-	-	-	-	-	-	-	-	-	-	-	-	-	-	-	-	T	T	T	T	M	W	A	C	W
Ab20	-1	0	0	0	-	-	-	-	-	-	-	-	-	-	-	-	-	-	-	-	-	-	-	-	-	-	-	-	-	-	-	-	-	-	-	-	-	-	-	-	-	-	C	T	C	A	A	C	A
Ab21	-1	0	0	0	-	-	-	-	-	-	-	-	-	-	-	-	-	-	-	-	-	-	-	-	-	-	-	-	-	-	-	-	-	-	-	-	-	-	-	-	T	W	A	C	A	A	A	C	A
B22	-1	0	0	0	-	-	-	-	-	-	-	-	-	-	-	-	-	-	-	-	-	-	-	-	-	-	-	-	-	-	-	-	-	-	-	-	-	-	-	-	-	-	-	-	-	-	-	-	-
B24	-1	0	0	0	-	-	-	-	-	-	-	-	-	-	-	-	-	-	-	-	-	-	-	-	-	-	-	-	-	-	-	-	-	-	-	-	-	-	-	-	-	-	-	-	-	A	W	Y	A
B25	-1	0	0	0	-	-	-	-	-	-	-	-	-	-	-	-	-	-	-	-	-	-	-	-	-	-	-	-	-	-	-	-	-	-	-	-	-	-	-	-	-	-	T	W	A	A	A	M	A
B26	-1	0	0	0	-	-	-	-	-	-	-	-	-	-	-	-	-	-	-	-	-	-	-	-	-	-	-	-	-	-	-	-	-	-	-	-	-	-	-	-	-	T	A	T	A	A	A	C	A
B27	-1	0	0	0	-	-	-	-	-	-	-	-	-	-	-	-	-	-	-	-	-	-	-	-	-	-	-	-	-	-	-	-	-	-	-	-	-	-	-	-	-	-	-	-	-	-	-	-	-
B28	-1	0	0	0	-	-	-	-	-	-	-	-	-	-	-	-	-	-	-	-	-	-	-	-	-	-	-	-	-	-	-	-	-	-	-	-	-	-	-	-	-	T	T	T	T	W	W	C	A
B29	-1	0	0	0	-	-	-	-	-	-	-	-	-	-	-	-	-	-	-	-	-	-	-	-	-	-	-	-	-	-	-	-	-	-	-	-	-	-	-	-	-	-	-	-	-	-	-	-	-
B30	-1	0	0	0	-	-	-	-	-	-	-	-	-	-	-	-	-	-	-	-	-	-	-	-	-	-	-	-	-	-	-	-	-	-	-	-	-	-	-	-	-	-	T	W	T	A	T	A	A
B32	-1	0	0	0	-	-	-	-	-	-	-	-	-	-	-	-	-	-	-	-	-	-	-	-	-	-	-	-	-	-	-	-	-	-	-	-	-	-	-	-	-	-	-	-	-	-	-	-	-
B33	-1	0	0	0	-	-	-	-	-	-	-	-	-	-	-	-	-	-	-	-	-	-	-	-	-	-	-	-	-	-	-	-	-	-	-	-	-	-	-	-	-	-	-	-	-	-	A	C	A
B34	-1	0	0	0	-	-	-	-	-	-	-	-	-	-	-	-	-	-	-	-	-	-	-	-	-	-	-	-	-	-	-	-	-	-	-	-	-	-	-	-	-	-	-	-	-	-	-	C	A
B35	-1	0	0	0	-	-	-	-	-	-	-	-	-	-	-	-	-	-	-	-	-	-	-	-	-	-	-	-	-	-	-	-	-	-	-	-	-	-	-	-	-	-	-	-	-	-	-	-	-
B36	-1	0	0	0	-	-	-	-	-	-	-	-	-	-	-	-	-	-	-	-	-	-	-	-	-	-	-	-	-	-	-	-	-	-	-	-	-	-	-	-	-	-	-	-	T	A	A	C	A
B37	-1	0	0	0	-	-	-	-	-	-	-	-	-	-	-	-	-	-	-	-	-	-	-	-	-	-	-	-	-	-	-	-	-	-	-	-	-	-	-	-	-	-	T	T	T	A	W	Y	T
B38	-1	0	0	0	-	-	-	-	-	-	-	-	-	-	-	-	-	-	-	-	-	-	-	-	-	-	-	-	-	-	-	-	-	-	-	-	-	-	-	-	-	-	-	T	T	A	T	C	A
B39	-1	0	0	0	-	-	-	-	-	-	-	-	-	-	-	-	-	-	-	-	-	-	-	-	-	-	-	-	-	-	-	-	-	-	-	-	-	-	-	-	-	-	-	-	-	-	-	-	-
B41	-1	0	0	0	-	-	-	-	-	-	-	-	-	-	-	-	-	-	-	-	-	-	-	-	-	-	-	-	-	-	-	-	-	-	-	-	-	-	-	-	-	-	-	-	-	-	-	-	-
B42	-1	0	0	0	-	-	-	-	-	-	-	-	-	-	-	-	-	-	-	-	-	-	-	-	-	-	-	-	-	-	-	-	-	-	-	-	-	-	-	-	-	-	-	T	T	A	A	C	A
B43	-1	0	0	0	-	-	-	-	-	-	-	-	-	-	-	-	-	-	-	-	-	-	-	-	-	-	-	-	-	-	-	-	-	-	-	-	-	-	-	-	-	-	-	-	-	-	-	-	-
B44	-1	0	0	0	-	-	-	-	-	-	-	-	-	-	-	-	-	-	-	-	-	-	-	-	-	-	-	-	-	-	-	-	-	-	-	-	-	-	-	-	-	-	-	-	T	A	A	C	A
D48	-1	0	0	0	-	-	-	-	-	-	-	-	-	-	-	-	-	-	-	-	-	-	-	-	-	-	-	-	-	-	-	-	-	-	-	-	-	-	-	-	-	-	-	-	-	A	A	C	A
D49	-1	0	0	0	-	-	-	-	-	-	-	-	-	-	-	-	-	-	-	-	-	-	-	-	-	-	-	-	-	-	-	-	-	-	-	-	-	-	-	-	G	G	G	G	T	A	A	C	A
D50	-1	0	0	0	-	-	-	-	-	-	-	-	-	-	-	-	-	-	-	-	-	-	-	-	-	-	-	-	-	-	-	-	-	-	-	-	-	-	-	-	-	-	-	-	T	A	A	C	W
D51	-1	0	0	0	-	-	-	-	-	-	-	-	-	-	-	-	-	-	-	-	-	-	-	-	-	-	-	-	-	-	-	-	-	-	-	-	-	-	-	-	-	-	-	-	-	-	-	-	-
D52	-1	0	0	0	-	-	-	-	-	-	-	-	-	-	-	-	-	-	-	-	-	-	-	-	-	-	-	-	-	-	-	-	-	-	-	-	-	-	-	-	-	-	-	-	T	A	A	C	A
D53	-1	0	0	0	-	-	-	-	-	-	-	-	-	-	-	-	-	-	-	-	-	-	-	-	-	-	-	-	-	-	-	-	-	-	-	-	-	-	-	-	-	-	-	-	-	-	A	C	A
D54	-1	0	0	0	-	-	-	-	-	-	-	-	-	-	-	-	-	-	-	-	-	-	-	-	-	-	-	-	-	-	-	-	-	-	-	-	-	-	-	-	-	-	-	-	-	-	A	C	A
D55	-1	0	0	0	-	-	-	-	-	-	-	-	-	-	-	-	-	-	-	-	-	-	-	-	-	-	-	-	-	-	-	-	-	-	-	-	-	-	-	-	-	-	-	-	-	-	-	-	-
D56	-1	0	0	0	-	-	-	-	-	-	-	-	-	-	-	-	-	-	-	-	-	-	-	-	-	-	-	-	-	-	-	-	-	-	-	-	-	-	-	G	C	T	A	A	C	A	A	S	G
E57	-1	0	0	0	-	-	-	-	-	-	-	-	-	-	-	-	-	-	-	-	-	-	-	-	-	-	-	-	-	-	-	-	-	-	-	-	-	-	-	-	-	-	-	-	-	-	A	Y	A
E58	-1	0	0	0	-	-	-	-	-	-	-	-	-	-	-	-	-	-	-	-	-	-	-	-	-	-	-	-	-	-	-	-	-	-	-	-	-	-	-	-	-	-	-	-	T	A	W	Y	A
F59	-1	0	0	0	-	-	-	-	-	-	-	-	-	-	-	-	-	-	-	-	-	-	-	-	-	-	-	-	-	-	-	-	-	-	-	-	-	-	-	-	-	-	-	-	-	A	A	C	A
F60	-1	0	0	0	-	-	-	-	-	T	T	W	M	T	T	A	C	W	T	T	W	Y	C	T	T	G	G	T	T	K	S	C	K	T	A	G	C	G	G	A	S	G	S	A	K	S	G	A	T
F61	-1	0	0	0	-	-	-	-	-	-	-	-	-	-	-	-	-	-	-	-	-	-	-	-	-	-	-	-	-	-	-	-	-	-	-	-	-	-	-	-	-	-	-	-	T	A	W	C	A
F62	-1	0	0	0	-	-	-	-	-	-	-	-	-	-	-	-	-	-	-	-	-	-	-	-	-	-	-	-	-	-	-	-	-	-	-	-	-	-	-	-	-	-	-	-	-	A	A	C	A
F63	-1	0	0	0	-	-	-	-	-	-	-	-	-	-	-	-	-	-	-	-	-	-	-	-	-	-	-	-	-	-	-	-	-	-	-	-	-	-	-	-	-	-	-	-	-	-	-	-	-
G64	-1	0	0	0	-	-	-	-	-	-	-	-	-	-	-	-	-	-	-	-	-	-	-	-	-	-	-	-	-	-	-	-	-	-	-	-	-	-	-	-	-	-	-	-	T	A	A	C	A
G65	-1	0	0	0	-	-	-	-	-	-	-	-	-	-	-	-	-	-	-	-	-	-	-	-	-	-	-	-	-	-	-	-	-	-	-	-	-	-	-	-	-	-	-	-	-	A	A	C	A
G66	-1	0	0	0	-	-	-	-	-	-	-	-	-	-	-	-	-	-	-	-	-	-	-	-	-	-	-	-	-	-	-	-	-	-	-	-	-	-	-	-	-	-	-	-	T	A	W	C	A
G67	-1	0	0	0	-	-	-	-	-	-	-	-	-	-	-	-	-	-	-	-	-	-	-	-	-	-	-	-	-	-	-	-	-	-	-	A	W	G	G	G	T	Y	T	T	A	A	C	A	A
G68	-1	0	0	0	-	-	-	-	-	-	-	-	-	-	-	-	-	-	-	-	-	-	-	-	-	-	-	-	-	-	-	-	-	-	-	-	-	-	-	-	-	-	-	-	-	A	A	C	A
G69	-1	0	0	0	-	-	-	-	-	-	-	-	-	-	-	-	-	-	-	-	-	-	-	-	-	-	-	-	-	-	-	-	-	-	-	-	-	-	-	-	-	-	-	T	C	W	A	C	A
G70	-1	0	0	0	-	-	-	-	-	-	-	-	-	-	-	-	-	-	-	-	-	-	-	-	-	-	-	-	-	-	-	-	-	-	-	-	-	-	-	-	-	-	A	A	C	A	A	G	G
J74	-1	0	0	0	-	-	-	-	-	-	-	-	-	-	-	-	-	-	-	-	-	-	-	-	-	-	-	-	-	-	T	A	T	M	A	A	R	R	A	K	T	T	T	R	T	A	A	C	A
J76	-1	0	0	0	-	-	-	-	-	-	-	-	-	-	-	-	-	-	-	-	-	-	-	-	-	-	-	-	-	-	-	-	-	-	-	-	-	-	-	-	-	-	-	-	-	A	A	C	A
J77	-1	0	0	0	-	-	-	-	-	-	-	-	-	-	-	-	-	-	-	-	-	-	-	-	-	-	-	-	-	-	-	-	-	-	-	-	-	-	-	-	-	-	-	-	-	A	A	C	A
J78	-1	0	0	0	-	-	-	-	-	-	-	-	-	-	-	-	-	-	-	-	-	-	-	-	-	-	-	-	-	-	-	-	-	-	-	-	-	-	-	-	-	-	-	T	T	A	A	C	A
J79	-1	0	0	0	-	-	-	-	-	-	-	-	-	-	-	-	-	-	-	-	-	-	-	-	-	-	-	-	-	-	-	-	-	-	-	-	-	-	-	-	-	-	-	T	T	T	A	M	A
J80	-1	0	0	0	-	-	-	-	-	-	-	-	-	-	-	-	-	-	-	-	-	-	-	-	-	-	-	-	-	-	-	-	-	-	-	-	-	-	-	-	-	T	T	T	T	W	A	C	A
J81	-1	0	0	0	T	A	A	C	W	A	A	R	C	A	A	G	G	T	T	T	G	G	G	T	A	G	C	T	G	A	M	C	S	T	A	G	G	G	A	A	G	G	A	T	C	A	G	A	G
J82	-1	0	0	0	-	-	-	-	-	-	-	-	-	-	-	-	-	-	-	-	-	-	-	-	-	-	-	-	-	-	-	-	-	-	-	-	-	-	-	-	-	-	-	T	T	A	A	C	A
J83	-1	0	0	0	-	-	-	-	-	-	-	-	-	-	-	-	-	-	-	-	-	-	-	-	-	-	-	-	-	-	-	-	-	-	-	-	-	-	-	-	-	-	-	-	-	A	W	C	A
J84	-1	0	0	0	-	-	-	-	-	-	-	-	-	-	-	-	-	-	-	-	-	-	-	-	-	-	-	-	-	-	-	-	-	-	-	-	-	-	-	-	-	-	-	-	-	-	A	C	A
J85	-1	0	0	0	-	-	-	-	-	-	-	-	-	-	-	-	-	-	-	-	-	-	-	-	-	-	-	-	-	-	-	-	-	-	-	-	-	-	-	-	-	-	-	-	T	A	W	C	A
F86	-1	0	0	0	-	-	-	-	-	-	-	-	-	-	-	-	-	-	-	-	-	-	-	-	-	-	-	-	-	-	-	-	-	-	-	-	-	-	-	-	-	-	-	-	T	W	A	C	A
KU855474.1	-1	0	0	0	-	-	-	-	-	-	-	-	-	-	-	-	-	-	-	-	-	-	-	-	-	-	-	-	-	-	-	-	-	-	-	-	-	-	-	-	-	-	-	-	-	-	-	-	-
																						1	1	1	1	1	1	1	1	1	1	1	1	1	1	1	1	1	1	1	1	1	1	1	1	1	1	1	1
	7	8	8	8	8	8	8	8	8	8	8	9	9	9	9	9	9	9	9	9	9	0	0	0	0	0	0	0	0	0	0	1	1	1	1	1	1	1	1	1	1	2	2	2	2	2	2	2	2
	9	0	1	2	3	4	5	6	7	8	9	0	1	2	3	4	5	6	7	8	9	0	1	2	3	4	5	6	7	8	9	0	1	2	3	4	5	6	7	8	9	0	1	2	3	4	5	6	7
Ab1	-1	0	0	0	T	C	C	G	T	A	G	G	T	G	A	A	C	C	T	G	C	G	G	A	-	-	-	-	-	-	-	A	G	G	A	T	C	A	T	T	A	C	C	G	A	G	T	G	T
Ab2	-1	0	0	0	.	.	.	.	.	.	.	.	.	.	.	.	.	.	.	.	.	.	A	.	-	-	-	-	-	-	-	.	.	.	.	.	.	.	.	.	.	.	.	.	.	.	.	.	-
Ab3	-1	0	0	0	.	.	.	.	.	.	.	.	.	.	.	.	.	.	.	.	.	.	.	.	-	-	-	-	-	-	-	.	.	A	.	.	.	.	.	.	G	.	A	.	.	.	A	.	.
Ab4	-1	0	0	0	.	.	.	.	.	.	A	.	G	.	.	.	.	.	.	.	.	.	.	.	-	-	-	-	-	-	A	.	.	-	.	A	.	.	A	.	.	.	.	.	.	A	.	.	-
Ab6	-1	0	0	0	.	T	G	.	.	.	.	.	.	.	G	.	A	G	G	A	T	C	A	.	-	-	-	-	-	-	-	-	.	.	.	.	.	.	.	.	G	G	G	C	.	.	.	.	.
Ab7	-1	0	0	0	.	G	.	.	.	.	.	.	G	.	.	.	.	.	.	.	.	.	.	.	-	-	-	-	-	-	-	.	.	.	.	.	.	.	.	.	.	.	.	.	.	.	.	.	.
Ab8	-1	0	0	0	-	-	-	-	-	-	-	-	-	-	-	-	-	-	-	-	-	-	-	-	-	-	-	-	-	-	-	-	-	-	-	-	-	-	-	-	-	-	-	-	-	-	-	-	-
Ab9	-1	0	0	0	-	-	-	-	-	-	-	-	-	-	-	-	-	-	-	-	-	-	-	-	-	-	-	-	-	-	-	-	-	-	-	-	-	-	-	-	-	-	-	-	-	-	-	-	-
Ab10	-1	0	0	0	A	T	.	A	.	T	A	C	C	.	.	G	T	G	.	T	T	.	.	.	C	T	G	C	G	G	A	.	.	.	.	.	.	.	.	.	.	.	.	.	.	.	.	.	-
Ab11	-1	0	0	0	-	T	T	A	.	T	M	T	.	A	.	.	T	T	C	A	S	C	.	G	-	-	-	-	-	-	-	-	.	T	.	.	.	C	C	.	.	.	M	T	G	A	.	C	-
Ab12	-1	0	0	0	A	T	.	A	.	T	A	C	C	.	.	G	T	G	.	T	T	.	.	.	T	G	G	-	-	G	A	.	.	.	.	.	.	.	.	.	.	.	.	.	.	.	.	.	-
Ab13	-1	0	0	0	-	T	T	T	.	K	C	T	.	A	.	.	T	T	.	A	K	S	.	G	-	-	-	-	-	-	-	-	.	T	.	.	A	C	C	C	.	.	.	.	G	.	.	T	-
Ab14	-1	0	0	0	.	A	T	.	.	T	T	S	C	.	G	T	G	G	C	C	.	.	.	.	T	C	-	-	-	-	-	.	T	.	.	Y	T	G	A	G	T	S	.	.	G	.	C	C	C
G16	-1	0	0	0	-	-	-	-	-	-	-	-	-	-	-	-	-	-	-	-	-	-	-	-	-	-	-	-	-	-	-	-	-	-	-	-	-	-	-	-	-	-	-	-	-	-	-	-	-
G17	-1	0	0	0	.	.	T	.	.	.	.	.	.	.	T	T	.	.	.	.	.	.	.	.	-	-	-	-	-	-	-	.	.	.	.	.	.	.	.	G	.	A	G	.	.	.	.	T	-
Ab19	-1	0	0	0	.	.	.	.	.	.	.	.	.	.	.	.	.	.	.	.	.	.	.	.	-	-	-	-	-	-	-	.	.	.	.	.	.	.	.	.	.	.	.	.	.	.	.	.	-
Ab20	-1	0	0	0	.	Y	M	.	.	.	.	.	.	.	.	M	.	.	.	.	.	.	.	.	-	-	-	-	-	-	-	.	.	R	.	.	.	.	.	.	.	.	.	.	.	.	.	.	-
Ab21	-1	0	0	0	.	.	G	.	.	.	.	.	.	.	.	.	.	T	.	.	.	.	.	.	-	-	-	-	-	-	-	.	.	.	.	.	.	.	.	.	.	.	.	.	.	.	.	.	-
B22	-1	0	0	0	.	T	T	C	.	.	.	A	G	.	.	.	.	.	C	C	T	.	.	.	-	-	-	-	-	-	-	.	A	.	G	.	A	.	.	A	T	T	.	S	.	.	W	.	.
B24	-1	0	0	0	.	.	.	.	.	.	.	.	.	.	.	.	.	.	.	.	.	.	.	.	-	-	-	-	-	-	A	G	.	-	.	.	.	.	.	.	.	.	.	.	.	.	.	.	-
B25	-1	0	0	0	.	.	T	.	.	.	.	.	.	.	.	.	.	.	.	.	.	.	.	.	-	-	-	-	-	-	-	.	.	.	.	.	.	.	.	.	.	.	.	.	.	.	.	.	-
B26	-1	0	0	0	.	.	G	.	.	.	.	.	.	.	.	.	.	.	.	.	.	.	.	.	-	-	-	-	-	-	-	.	.	.	.	.	.	.	.	.	.	.	.	.	.	.	.	.	-
B27	-1	0	0	0	-	-	-	-	-	-	-	-	-	-	-	-	-	-	-	-	-	-	-	-	-	-	-	-	-	-	-	-	-	-	-	-	-	-	-	-	-	-	-	-	-	-	-	-	-
B28	-1	0	0	0	.	.	.	.	.	.	.	.	.	.	.	.	.	.	.	.	.	.	.	.	-	-	-	-	-	-	-	.	.	.	.	.	.	.	.	.	.	.	.	.	.	.	.	.	G
B29	-1	0	0	0	-	-	-	-	-	-	-	-	-	-	-	-	-	-	-	-	-	-	-	-	-	-	-	-	-	-	-	-	-	-	-	-	-	-	-	-	-	-	-	-	-	-	-	-	-
B30	-1	0	0	0	.	T	T	.	.	.	.	.	G	.	.	.	.	.	C	.	.	.	.	.	-	-	-	-	-	-	-	.	A	.	.	.	.	.	.	.	T	.	.	.	.	.	A	.	.
B32	-1	0	0	0	A	G	G	A	.	C	A	T	.	A	C	-	-	-	.	.	.	.	.	.	-	-	-	-	-	-	A	G	.	-	.	.	.	.	.	.	.	.	.	.	.	.	.	.	-
B33	-1	0	0	0	-	.	.	.	.	.	.	.	.	.	.	.	.	.	.	.	.	.	.	.	-	-	-	-	-	-	A	G	.	-	.	.	.	.	.	.	.	.	.	.	.	.	.	.	-
B34	-1	0	0	0	.	-	-	.	.	.	.	T	A	.	.	.	.	G	G	.	.	.	.	.	-	-	-	-	-	-	-	G	.	A	G	G	.	.	.	.	C	.	T	.	.	.	G	.	A
B35	-1	0	0	0	G	A	A	.	.	.	T	T	A	A	.	.	.	.	.	T	.	.	.	.	-	-	-	-	-	-	-	.	.	T	.	.	.	.	A	.	C	.	.	.	.	.	G	.	A
B36	-1	0	0	0	.	A	A	.	.	.	.	.	.	.	.	.	.	.	.	.	G	.	.	.	-	-	-	-	-	-	-	.	.	.	.	.	.	.	.	A	.	.	.	.	.	.	.	.	-
B37	-1	0	0	0	.	.	.	.	.	.	.	.	.	.	.	.	.	.	.	.	.	.	.	.	-	-	-	-	-	-	A	G	.	-	.	.	.	.	.	.	.	.	.	.	.	.	.	.	-
B38	-1	0	0	0	.	T	T	T	.	.	.	.	.	.	.	.	.	.	.	.	.	.	.	.	-	-	-	-	-	-	-	.	.	.	.	A	.	.	.	.	C	.	.	.	.	.	A	.	-
B39	-1	0	0	0	.	.	.	.	.	.	.	.	.	.	.	.	.	.	.	.	.	.	.	.	-	-	-	-	-	-	A	G	.	-	.	.	.	.	.	.	T	.	.	.	.	.	.	.	-
B41	-1	0	0	0	.	.	.	.	.	.	.	.	.	T	.	.	.	.	.	.	.	.	.	.	-	-	-	-	-	-	-	.	.	.	.	.	.	.	.	.	.	.	.	.	.	.	.	.	-
B42	-1	0	0	0	-	.	.	.	.	.	.	.	.	.	.	.	.	.	.	.	.	.	.	.	-	-	-	-	-	-	A	G	.	-	.	.	.	.	.	.	.	.	.	.	.	.	.	.	-
B43	-1	0	0	0	-	-	-	-	-	-	-	-	-	-	-	-	-	-	-	-	-	-	-	-	-	-	-	-	-	-	-	-	-	-	-	-	-	-	-	-	-	-	-	-	-	-	-	-	-
B44	-1	0	0	0	-	.	.	.	.	.	.	.	.	.	.	.	.	.	.	.	.	.	.	.	-	-	-	-	-	-	A	G	.	-	.	.	.	.	.	.	.	.	.	.	.	.	.	.	-
D48	-1	0	0	0	-	.	.	.	.	.	.	.	.	.	.	.	.	.	.	.	.	.	.	.	-	-	-	-	-	-	A	G	.	-	.	.	.	.	.	.	M	.	.	.	.	.	.	.	-
D49	-1	0	0	0	.	.	.	.	.	.	.	.	.	.	.	.	.	.	.	.	.	.	.	.	-	-	-	-	-	-	A	G	.	-	.	.	.	.	.	.	.	.	.	.	.	.	.	T	-
D50	-1	0	0	0	.	.	.	.	.	.	.	.	.	.	.	.	.	.	.	.	.	.	.	.	-	-	-	-	-	-	A	G	.	-	.	.	.	.	.	.	.	.	.	.	.	.	.	.	-
D51	-1	0	0	0	-	-	-	-	-	-	-	-	-	-	-	-	-	-	-	-	-	-	-	-	-	-	-	-	-	-	-	-	-	-	-	-	-	-	-	-	-	-	-	-	-	-	-	-	-
D52	-1	0	0	0	.	.	.	.	.	.	.	.	.	.	.	.	.	.	.	.	.	.	.	.	-	-	-	-	-	-	A	G	.	-	.	.	.	.	.	.	.	.	.	.	.	.	.	.	-
D53	-1	0	0	0	.	.	G	.	.	.	.	.	.	.	.	.	.	.	.	.	.	.	.	.	-	-	-	-	-	-	A	G	.	-	.	.	.	.	.	.	.	.	.	.	.	.	.	.	-
D54	-1	0	0	0	.	.	G	.	.	.	.	.	.	.	.	.	.	.	.	.	.	.	.	.	-	-	-	-	-	-	A	G	.	-	.	.	.	.	.	.	.	.	.	.	.	.	.	.	-
D55	-1	0	0	0	A	R	.	.	G	G	C	T	.	A	.	.	T	T	C	A	G	C	.	G	-	-	-	-	-	-	-	-	.	T	.	.	.	C	C	.	C	.	.	T	G	A	.	C	-
D56	-1	0	0	0	.	.	G	.	.	.	.	.	G	.	.	.	.	.	.	.	.	.	.	.	-	-	-	-	-	-	A	G	.	-	.	.	.	T	.	.	.	.	.	.	.	C	C	.	-
E57	-1	0	0	0	.	.	.	.	.	.	.	.	.	.	.	.	.	.	.	.	.	.	.	.	-	-	-	-	-	-	A	G	.	-	.	.	.	.	.	.	.	.	.	.	.	.	.	.	-
E58	-1	0	0	0	.	.	.	.	.	.	.	.	.	.	.	.	.	.	.	.	.	.	.	.	-	-	-	-	-	-	A	G	.	-	.	.	.	.	.	.	.	.	.	.	.	.	.	.	-
F59	-1	0	0	0	.	.	.	.	.	.	.	.	.	.	.	.	.	.	.	.	.	.	.	.	-	-	-	-	-	-	A	.	A	C	.	A	G	G	.	.	T	.	.	.	T	A	G	.	-
F60	-1	0	0	0	.	.	.	.	.	.	.	.	.	.	.	.	.	.	.	.	.	.	.	.	-	-	-	-	-	-	A	G	.	-	.	.	.	.	.	.	.	.	.	.	.	.	.	.	-
F61	-1	0	0	0	.	.	.	.	.	.	.	.	.	.	.	.	.	.	.	.	.	.	.	.	-	-	-	-	-	-	A	G	.	-	.	.	.	.	.	.	.	.	.	.	.	.	.	.	-
F62	-1	0	0	0	-	A	G	.	A	.	.	.	.	.	.	G	T	.	.	.	.	.	.	.	-	-	-	-	-	-	-	.	.	.	.	.	.	.	.	.	.	.	.	.	.	.	.	.	-
F63	-1	0	0	0	.	.	.	.	.	.	.	.	.	.	.	.	.	.	.	.	.	.	.	.	-	-	-	-	-	-	A	G	.	-	.	.	.	.	.	.	.	.	.	.	.	.	.	.	-
G64	-1	0	0	0	.	.	.	.	.	.	.	.	.	.	.	.	.	.	.	.	.	.	.	.	-	-	-	-	-	-	A	G	.	-	.	.	.	.	.	.	.	.	.	.	.	.	.	.	-
G65	-1	0	0	0	-	.	.	.	.	.	.	.	.	.	.	.	.	.	.	.	.	.	.	.	-	-	-	-	-	-	-	.	.	.	.	.	.	.	.	.	.	.	.	.	.	.	.	.	-
G66	-1	0	0	0	A	G	G	A	.	C	.	.	.	.	.	.	.	.	.	.	.	.	.	.	-	-	-	-	-	-	A	G	.	-	.	.	.	.	.	.	.	.	.	.	.	.	.	.	-
G67	-1	0	0	0	.	A	T	C	G	.	.	.	G	.	.	.	.	.	.	C	.	.	.	.	-	-	-	-	-	-	A	G	.	-	.	.	.	.	.	.	.	T	.	.	.	.	.	.	-
G68	-1	0	0	0	A	G	G	A	.	.	.	.	.	.	.	.	.	.	.	.	.	.	.	.	-	-	-	-	-	-	A	G	.	-	.	.	.	.	.	.	.	.	.	.	.	.	.	.	-
G69	-1	0	0	0	.	.	.	.	.	.	.	.	.	.	.	.	.	.	.	.	.	.	.	.	-	-	-	-	-	-	A	G	.	-	.	.	.	.	.	.	.	.	.	.	.	.	.	.	-
G70	-1	0	0	0	.	.	Y	.	.	.	.	.	.	.	.	R	.	.	.	.	.	.	.	.	-	-	-	-	-	-	A	G	.	-	.	.	.	.	.	.	.	.	Y	.	.	.	.	.	-
J74	-1	0	0	0	.	.	.	.	.	.	.	.	.	.	.	.	.	.	.	.	.	.	.	.	-	-	-	-	-	-	A	G	.	-	.	.	.	.	.	.	.	.	.	.	.	.	.	.	-
J76	-1	0	0	0	.	.	.	.	.	.	.	.	.	.	.	.	.	.	.	.	.	.	.	.	-	-	-	-	-	-	A	G	.	-	.	.	.	.	.	.	.	.	.	.	.	.	.	.	-
J77	-1	0	0	0	.	.	.	.	.	.	.	.	.	.	.	.	.	.	.	.	.	.	.	.	-	-	-	-	-	-	A	G	.	-	.	.	.	.	.	.	.	.	.	.	.	.	.	.	-
J78	-1	0	0	0	.	.	.	.	.	.	.	.	.	.	.	G	.	T	.	.	.	.	.	.	-	-	-	-	-	-	-	.	.	.	.	.	.	.	.	.	.	.	.	.	.	.	.	.	-
J79	-1	0	0	0	.	.	.	.	.	.	.	.	.	.	.	.	.	.	.	.	T	.	.	.	-	-	-	-	-	-	-	.	.	.	.	.	.	.	.	.	.	.	.	.	.	.	.	.	-
J80	-1	0	0	0	.	.	.	.	.	.	.	.	.	.	.	.	.	.	.	.	.	.	.	.	-	-	-	-	-	-	A	G	.	-	.	.	.	.	.	.	.	.	.	.	.	.	.	.	-
J81	-1	0	0	0	.	G	G	.	.	.	.	C	.	.	.	.	.	G	.	A	G	.	.	.	-	-	-	-	-	-	-	.	.	.	.	.	.	.	G	A	G	T	G	.	.	.	.	.	-
J82	-1	0	0	0	-	.	.	.	.	.	.	.	.	.	.	.	.	.	.	.	.	.	.	.	-	-	-	-	-	-	A	G	.	-	.	.	.	.	.	.	.	.	.	.	.	.	.	.	-
J83	-1	0	0	0	-	.	.	.	.	.	.	.	.	.	.	.	.	.	.	.	.	.	.	.	-	-	-	-	-	-	A	G	.	-	.	.	.	.	.	.	.	.	.	.	.	.	.	.	-
J84	-1	0	0	0	-	.	.	.	.	.	.	.	.	.	.	.	.	.	.	.	.	.	.	.	-	-	-	-	-	-	A	G	.	-	.	.	.	.	.	.	.	.	.	.	.	.	.	.	-
J85	-1	0	0	0	A	G	G	A	.	C	A	T	.	A	-	-	-	-	.	.	.	.	.	.	-	-	-	-	-	-	A	G	.	-	.	.	.	.	.	.	.	.	.	.	.	.	.	.	-
F86	-1	0	0	0	-	.	.	.	.	.	.	.	.	.	.	.	.	.	.	.	.	.	.	.	-	-	-	-	-	-	A	G	.	-	.	.	.	.	.	.	.	.	.	.	.	.	.	.	-
KU855474.1	-1	0	0	0	C	.	.	A	C	.	.	A	A	A	G	.	.	.	C	.	.	.	A	.	C	A	-	-	-	-	G	G	T	T	.	C	A	.	C	G	T	T	T	.	G	.	G	.	G
	1	1	1	1	1	1	1	1	1	1	1	1	1	1	1	1	1	1	1	1	1	1	1	1	1	1	1	1	1	1	1	1	1	1	1	1	1	1	1	1	1	1	1	2	2	2	2	2	2
	5	5	5	6	6	6	6	6	6	6	6	6	6	7	7	7	7	7	7	7	7	7	7	8	8	8	8	8	8	8	8	8	8	9	9	9	9	9	9	9	9	9	9	0	0	0	0	0	0
	7	8	9	0	1	2	3	4	5	6	7	8	9	0	1	2	3	4	5	6	7	8	9	0	1	2	3	4	5	6	7	8	9	0	1	2	3	4	5	6	7	8	9	0	1	2	3	4	5
Ab1	-1	0	0	0	-	-	-	S	T	Y	C	T	C	C	C	A	T	C	S	G	M	R	-	T	S	T	A	T	T	T	G	T	A	C	-	-	C	M	T	G	K	K	K	C	-	T	T	S	-
Ab2	-1	0	0	0	-	-	-	G	.	C	.	.	.	.	.	.	Y	.	C	.	T	G	-	.	Y	.	.	.	.	.	.	.	.	.	-	-	.	C	.	.	T	T	G	.	-	.	.	C	-
Ab3	-1	0	0	0	-	-	-	G	.	S	.	K	M	M	Y	.	Y	.	G	.	T	G	-	Y	C	.	.	.	.	.	.	.	.	.	-	-	.	C	.	.	.	T	G	S	-	.	.	M	-
Ab4	-1	0	0	0	-	-	-	-	-	-	-	-	Y	.	.	.	W	.	C	.	T	G	-	W	Y	.	-	Y	.	.	.	.	.	.	-	-	.	C	.	.	T	T	G	.	-	.	.	C	-
Ab6	-1	0	0	0	-	-	-	A	.	C	Y	.	A	T	.	.	C	.	T	.	G	T	G	K	M	W	M	W	K	K	.	G	G	.	T	T	.	C	C	.	T	T	G	G	-	-	.	T	-
Ab7	-1	0	0	0	-	-	-	G	.	C	.	.	M	.	.	M	.	M	C	.	T	Y	-	.	K	.	.	.	.	W	.	.	W	.	-	-	.	C	.	.	S	T	G	S	-	.	.	W	-
Ab8	-1	0	0	0	-	-	-	G	.	C	.	.	.	.	.	.	.	.	C	.	T	G	-	.	C	.	.	.	.	.	.	.	.	.	-	-	.	C	.	S	T	T	G	S	C	.	K	C	-
Ab9	-1	0	0	0	-	-	-	G	.	C	.	.	.	.	.	.	.	.	C	.	T	G	-	.	C	.	.	.	.	.	.	.	.	.	-	-	.	C	.	.	T	T	G	.	-	.	.	C	-
Ab10	-1	0	0	0	-	-	-	G	.	C	.	.	.	.	.	.	.	.	C	.	T	G	-	.	C	.	.	.	.	.	.	.	.	.	-	-	.	C	.	.	T	T	G	.	-	.	.	C	-
Ab11	-1	0	0	0	-	-	-	-	-	-	-	-	-	-	-	.	A	A	G	.	T	T	-	G	G	G	G	.	.	G	.	G	-	-	-	-	-	-	-	-	-	-	-	-	-	-	-	-	-
Ab12	-1	0	0	0	-	-	-	G	.	C	.	.	.	.	.	.	.	.	C	.	T	G	-	.	C	.	.	.	.	.	.	.	.	.	-	-	.	C	.	.	T	T	G	.	-	.	.	C	-
Ab13	-1	0	0	0	-	-	T	T	.	A	A	A	A	A	A	.	C	A	G	.	T	T	-	.	.	G	G	.	C	A	A	G	.	.	C	C	Y	C	A	.	C	A	G	.	G	.	.	T	T
Ab14	-1	0	0	0	-	-	-	-	-	-	.	.	.	T	A	C	A	A	C	.	T	G	-	.	T	.	G	.	.	.	.	.	G	R	A	-	.	.	.	S	C	.	.	G	G	S	.	A	T
G16	-1	0	0	0	T	C	C	G	.	C	.	.	.	.	.	.	.	.	C	.	A	G	-	.	C	.	.	.	.	.	.	.	.	.	-	-	.	C	.	.	T	T	G	.	-	.	.	C	-
G17	-1	0	0	0	-	-	-	G	.	C	.	.	.	.	Y	.	.	Y	.	.	W	S	-	Y	C	.	R	.	.	.	.	.	K	.	-	-	.	C	.	K	T	T	G	S	-	.	.	C	-
Ab19	-1	0	0	0	-	-	-	G	.	C	.	.	.	.	.	.	.	.	C	.	T	G	-	.	C	.	.	.	.	.	.	.	.	.	-	-	.	C	.	.	T	T	G	.	-	.	.	C	-
Ab20	-1	0	0	0	-	-	-	G	.	C	.	.	.	.	.	.	.	.	C	.	T	G	-	.	C	.	.	.	.	.	.	.	.	.	-	-	.	C	.	.	T	T	G	.	-	.	.	M	-
Ab21	-1	0	0	0	-	-	-	G	.	C	.	.	.	.	.	.	.	.	C	.	T	G	-	.	T	.	.	.	.	Y	.	.	.	S	-	-	M	.	Y	R	T	W	S	.	-	.	W	M	-
B22	-1	0	0	0	-	-	-	.	.	C	.	Y	.	.	.	.	.	S	Y	.	T	G	-	.	M	.	W	.	.	.	.	.	M	.	-	-	.	S	.	.	T	T	G	Y	-	.	.	Y	-
B24	-1	0	0	0	-	-	-	G	.	C	.	.	.	.	.	.	.	.	C	.	T	G	-	.	C	.	.	.	.	.	.	.	.	.	-	-	.	C	.	.	T	T	G	.	-	.	.	C	-
B25	-1	0	0	0	-	-	-	G	.	C	.	.	.	.	.	.	.	.	C	.	T	G	-	.	C	.	.	.	.	.	.	.	.	.	-	-	.	C	.	.	T	T	G	Y	-	.	.	C	-
B26	-1	0	0	0	-	-	-	G	.	C	.	.	.	.	.	.	.	.	C	.	T	G	-	.	C	.	.	.	.	.	.	.	.	.	-	-	.	C	.	.	T	T	G	.	-	.	.	C	-
B27	-1	0	0	0	-	-	-	G	.	C	.	.	.	.	.	.	.	.	C	.	T	G	-	.	C	.	.	.	.	.	.	.	.	.	-	-	.	C	.	.	T	T	G	.	-	.	.	C	-
B28	-1	0	0	0	-	-	-	G	.	C	.	.	.	.	.	.	.	.	C	.	T	G	-	.	C	.	.	.	.	.	.	.	.	.	-	-	.	C	.	.	T	T	G	.	-	.	.	C	-
B29	-1	0	0	0	C	C	T	.	Y	.	A	.	T	.	G	G	C	S	G	.	T	G	-	.	C	.	.	.	Y	C	A	.	.	.	-	-	.	C	.	.	T	T	G	M	-	.	.	C	-
B30	-1	0	0	0	-	-	-	.	.	C	.	Y	.	.	.	M	Y	.	C	.	T	G	-	.	.	.	.	.	.	.	.	.	R	.	-	-	.	C	Y	.	T	.	.	Y	-	.	.	Y	-
B32	-1	0	0	0	-	-	-	G	.	C	.	.	.	.	.	.	.	.	C	.	T	G	-	.	C	.	.	.	.	.	.	.	.	.	-	-	.	C	.	.	T	T	G	.	-	.	.	C	-
B33	-1	0	0	0	-	-	-	G	.	C	.	.	.	.	.	.	.	.	C	.	T	G	-	.	C	.	.	.	.	.	.	.	.	.	-	-	.	C	.	.	T	T	G	.	-	.	.	C	G
B34	-1	0	0	0	W	T	C	G	.	C	.	.	.	.	Y	.	.	.	C	K	.	S	C	.	Y	.	R	.	.	K	K	.	T	.	-	-	.	C	K	.	.	T	S	.	T	.	Y	.	-
B35	-1	0	0	0	T	C	C	G	K	C	S	.	.	.	.	W	.	.	C	S	T	G	-	.	C	G	W	.	.	.	.	.	Y	.	-	-	.	C	.	S	.	T	.	S	T	.	Y	Y	-
B36	-1	0	0	0	-	-	-	.	Y	C	S	.	.	.	.	.	.	.	C	.	W	G	-	Y	C	.	.	.	.	.	.	.	.	.	-	-	.	Y	.	.	T	T	G	M	-	.	.	C	-
B37	-1	0	0	0	-	-	-	G	.	C	.	.	.	.	.	.	.	.	C	.	T	G	-	.	C	.	.	.	.	.	.	.	.	.	-	-	.	C	.	.	T	T	G	.	-	.	.	C	-
B38	-1	0	0	0	-	-	S	G	.	C	.	.	.	.	Y	M	Y	.	C	.	W	G	-	.	Y	.	W	.	.	K	K	.	T	.	-	-	.	C	.	.	.	T	.	Y	-	.	.	Y	-
B39	-1	0	0	0	-	-	-	-	-	-	-	-	M	.	.	W	.	.	C	K	T	G	-	.	M	.	-	C	.	.	.	.	.	Y	-	-	Y	Y	.	.	C	S	G	S	-	W	W	C	-
B41	-1	0	0	0	-	-	-	G	Y	C	.	.	.	.	.	.	.	.	C	.	K	G	-	.	Y	.	.	.	.	.	.	.	.	.	-	-	.	Y	.	.	T	T	G	S	-	.	.	.	-
B42	-1	0	0	0	-	-	-	G	.	C	.	.	.	.	.	.	.	.	C	.	T	G	-	.	C	.	.	.	.	.	.	.	.	.	-	-	.	C	.	.	T	T	G	.	-	.	.	C	-
B43	-1	0	0	0	-	-	-	-	-	-	-	.	.	.	.	.	.	.	C	.	T	G	-	C	C	.	.	.	.	C	-	.	.	G	-	-	.	C	.	.	T	T	G	.	-	.	.	C	-
B44	-1	0	0	0	-	-	-	G	.	C	.	.	.	.	.	.	.	.	C	.	T	G	-	.	C	.	.	.	.	.	.	.	.	.	-	-	.	C	.	.	T	T	G	.	-	.	.	C	-
D48	-1	0	0	0	-	-	-	G	.	C	.	.	.	.	.	.	.	.	C	.	T	G	-	.	C	.	.	.	.	.	.	.	.	.	-	-	.	C	.	.	T	T	G	.	-	.	.	C	-
D49	-1	0	0	0	-	-	-	-	-	-	-	.	.	.	.	.	.	.	C	.	T	G	-	.	C	.	.	.	.	C	A	.	.	.	-	-	.	C	.	.	T	T	R	S	-	.	.	C	-
D50	-1	0	0	0	-	-	-	-	-	-	-	.	.	.	.	.	.	.	C	.	T	G	-	.	C	.	.	.	.	C	A	.	.	.	-	-	.	C	.	.	T	T	G	.	-	.	.	C	-
D51	-1	0	0	0	-	-	-	-	-	-	-	-	.	.	.	.	.	.	C	.	T	G	-	.	C	.	-	C	.	.	.	.	C	.	-	-	.	-	.	.	T	T	G	G	-	.	.	C	-
D52	-1	0	0	0	-	-	-	-	-	-	-	.	.	.	.	.	.	.	C	.	T	G	-	.	C	.	.	.	.	C	A	.	.	.	-	-	.	C	.	.	T	T	G	.	-	.	.	C	-
D53	-1	0	0	0	-	-	-	G	.	C	.	.	.	.	.	.	.	.	C	.	T	G	-	.	C	.	.	.	.	.	.	.	W	.	-	-	.	C	.	.	T	T	G	S	-	.	.	C	-
D54	-1	0	0	0	-	-	-	G	.	C	.	.	.	.	.	.	.	.	C	.	T	G	-	.	C	.	.	.	.	.	.	.	W	.	-	-	.	C	.	.	T	T	G	S	-	.	.	C	-
D55	-1	0	0	0	-	-	-	-	-	-	-	-	-	-	-	.	A	A	G	.	T	T	-	G	G	G	G	.	.	G	.	G	-	-	-	-	-	-	-	-	-	-	-	-	-	-	-	-	-
D56	-1	0	0	0	-	-	-	-	-	-	-	-	.	.	.	.	.	.	.	.	T	G	-	.	Y	.	-	Y	.	.	.	.	M	.	-	-	.	C	.	.	T	T	.	K	-	.	.	C	-
E57	-1	0	0	0	-	-	-	-	-	-	-	.	.	.	.	.	.	.	C	.	T	G	-	.	C	.	.	.	.	C	A	.	.	.	-	-	.	C	.	.	T	T	G	.	-	.	.	C	-
E58	-1	0	0	0	-	-	-	-	-	-	-	.	.	.	.	.	.	.	C	.	T	G	-	.	C	.	.	.	.	C	A	.	.	.	-	-	.	C	.	.	T	T	G	.	-	.	.	C	-
F59	-1	0	0	0	-	-	-	-	-	-	-	G	T	G	A	.	C	.	T	.	C	G	-	G	A	A	.	W	.	C	A	.	.	.	-	-	.	C	.	.	T	T	G	T	-	.	.	C	-
F60	-1	0	0	0	-	-	-	-	-	-	-	-	.	.	.	.	.	.	C	.	T	G	-	.	C	.	.	.	C	.	.	.	.	.	-	-	.	C	K	.	T	.	G	Y	-	.	.	C	-
F61	-1	0	0	0	-	-	-	-	-	-	-	-	.	.	.	.	.	.	C	.	T	G	-	.	C	.	-	C	.	.	.	.	.	.	-	-	.	C	.	.	T	T	G	.	-	.	.	C	-
F62	-1	0	0	0	-	-	-	-	-	C	.	.	.	.	.	.	.	.	C	.	T	G	-	.	C	.	.	.	.	C	A	.	.	.	-	-	.	C	.	.	T	T	G	.	-	.	.	Y	-
F63	-1	0	0	0	T	C	C	A	A	C	.	.	.	.	.	.	.	.	C	.	T	G	-	.	C	.	.	.	.	C	A	.	.	.	-	-	.	C	.	.	T	T	G	.	-	.	.	C	-
G64	-1	0	0	0	-	-	-	-	-	-	-	.	.	.	.	.	.	.	C	.	T	G	-	.	C	.	.	.	.	C	A	.	.	.	-	-	.	C	.	.	T	T	G	.	-	.	.	C	-
G65	-1	0	0	0	-	-	-	G	.	C	.	.	.	.	.	.	.	.	C	.	T	G	-	.	C	.	.	.	.	.	.	.	.	.	-	-	.	C	.	.	T	T	G	.	-	.	.	C	-
G66	-1	0	0	0	-	-	-	G	.	C	.	.	.	.	.	.	.	.	C	.	T	G	-	.	C	.	.	.	.	.	.	.	.	.	-	-	.	C	.	.	T	T	G	.	-	.	.	C	-
G67	-1	0	0	0	-	-	-	-	-	-	-	-	.	.	.	M	.	.	.	.	T	G	-	.	Y	.	-	Y	.	.	.	.	.	.	-	-	.	C	.	.	T	T	G	Y	-	.	.	C	-
G68	-1	0	0	0	-	-	-	-	-	-	-	.	.	.	.	.	.	.	C	.	T	G	-	.	C	.	.	.	.	C	A	.	.	.	-	-	.	C	.	.	T	T	G	.	-	.	.	C	-
G69	-1	0	0	0	-	-	-	G	.	C	.	.	.	.	.	.	.	.	C	.	T	G	-	.	C	.	.	.	.	.	.	.	.	.	-	-	.	C	.	.	T	T	G	.	-	.	.	C	-
G70	-1	0	0	0	-	-	-	-	-	-	-	.	.	.	.	.	.	.	C	.	T	G	-	Y	C	.	.	.	.	C	A	.	.	.	-	-	.	C	.	.	T	T	G	.	-	.	.	C	-
J74	-1	0	0	0	-	-	-	-	-	-	-	-	.	.	.	.	.	.	C	.	T	G	-	.	C	.	-	C	.	.	.	.	.	.	-	-	.	C	.	.	T	T	G	.	-	.	.	C	-
J76	-1	0	0	0	-	-	-	-	-	-	-	.	.	.	.	.	.	.	C	.	T	G	-	.	C	.	.	.	.	C	A	.	.	.	-	-	.	C	.	.	T	T	G	.	-	.	.	C	-
J77	-1	0	0	0	-	-	-	-	-	-	-	.	.	.	.	.	.	.	C	.	T	G	-	.	C	.	.	.	.	C	A	.	.	.	-	-	.	C	.	.	T	T	G	.	-	.	.	C	-
J78	-1	0	0	0	-	-	-	G	.	C	.	.	.	.	.	.	.	.	C	.	T	G	-	.	Y	.	.	.	.	.	.	.	W	.	-	-	.	C	.	.	T	T	G	Y	-	.	.	.	-
J79	-1	0	0	0	-	-	-	G	.	C	.	.	.	.	.	.	.	.	C	.	T	G	-	.	T	.	.	.	.	.	.	.	.	.	-	-	.	C	.	.	T	T	G	Y	-	.	.	Y	-
J80	-1	0	0	0	-	-	-	-	-	-	-	-	.	.	.	.	.	.	C	.	T	G	-	.	C	.	-	C	.	Y	S	.	.	.	-	-	.	C	.	.	T	T	G	.	-	.	.	C	-
J81	-1	0	0	0	-	-	-	G	.	C	.	.	.	.	.	M	.	Y	C	.	T	G	-	.	W	.	.	.	.	Y	.	.	G	.	-	-	.	C	.	.	T	T	G	S	-	.	.	.	-
J82	-1	0	0	0	-	-	-	G	.	C	.	.	.	.	.	.	.	.	C	.	T	G	-	.	C	.	.	.	.	.	.	.	.	.	-	-	.	C	.	.	T	T	G	.	-	.	.	C	-
J83	-1	0	0	0	-	-	-	G	.	C	.	.	.	.	.	.	.	.	C	.	T	G	-	.	C	.	.	.	.	.	.	.	.	.	-	-	.	C	.	.	T	T	G	.	-	.	.	C	-
J84	-1	0	0	0	-	-	-	G	.	C	.	.	.	.	.	.	.	.	C	.	T	G	-	.	C	.	.	.	.	.	.	.	.	.	-	-	.	C	.	.	T	T	G	.	-	.	.	C	-
J85	-1	0	0	0	-	-	-	G	.	C	.	.	.	.	.	.	.	.	C	.	T	G	-	.	C	.	.	.	.	.	.	.	.	.	-	-	.	C	.	.	T	T	G	.	-	.	.	C	-
F86	-1	0	0	0	-	-	-	G	.	C	.	.	.	.	.	.	.	.	C	.	T	G	-	.	C	.	.	.	.	.	.	.	.	.	-	-	.	C	.	.	T	T	G	.	-	.	.	C	-
KU855474.1	-1	0	0	0	-	-	-	-	-	-	.	C	.	.	A	C	G	Y	C	.	A	G	A	G	C	G	C	G	.	G	.	.	T	T	T	G	.	C	C	C	G	C	G	T	C	C	.	C	-
	2	2	2	2	2	2	2	2	2	2	2	2	2	2	2	2	2	2	2	2	2	2	2	2	2	2	2	2	2	2	2	2	2	2	2	2	2	2	2	2	2	2	2	2	2	2	2	2	2
	3	3	3	3	3	4	4	4	4	4	4	4	4	4	4	5	5	5	5	5	5	5	5	5	5	6	6	6	6	6	6	6	6	6	6	7	7	7	7	7	7	7	7	7	7	8	8	8	8
	5	6	7	8	9	0	1	2	3	4	5	6	7	8	9	0	1	2	3	4	5	6	7	8	9	0	1	2	3	4	5	6	7	8	9	0	1	2	3	4	5	6	7	8	9	0	1	2	3
Ab1	-1	0	0	0	-	-	-	-	-	-	-	-	-	-	-	-	-	-	-	-	G	K	C	G	G	S	-	-	-	-	C	Y	C	S	M	C	-	-	-	-	-	-	-	-	-	-	-	-	-
Ab2	-1	0	0	0	-	-	-	-	-	-	-	-	-	-	-	-	-	-	-	-	R	G	.	.	.	G	-	-	-	-	.	C	.	G	C	.	-	-	-	-	-	-	-	-	-	-	-	-	-
Ab3	-1	0	0	0	-	-	-	-	-	-	-	-	-	-	-	-	-	-	-	-	S	G	Y	K	R	G	-	-	-	-	.	C	.	R	C	.	-	-	-	-	-	-	-	-	-	-	-	-	-
Ab4	-1	0	0	0	-	-	-	-	-	-	-	-	-	-	-	-	-	-	-	-	.	G	.	.	.	G	-	-	-	-	.	C	.	K	C	.	-	-	-	-	-	-	-	-	-	-	-	-	-
Ab6	-1	0	0	0	-	-	-	-	-	-	-	-	-	-	-	-	-	-	-	-	.	S	.	C	S	T	-	-	-	-	.	T	.	G	G	.	G	G	-	-	-	-	-	-	-	-	-	-	-
Ab7	-1	0	0	0	-	-	-	-	-	-	-	-	-	-	-	-	-	-	-	-	.	.	G	.	.	G	-	-	-	-	.	C	S	C	C	.	-	-	-	-	-	-	-	-	-	-	-	-	-
Ab8	-1	0	0	0	-	-	-	-	-	-	-	-	-	-	-	-	-	-	-	-	.	G	S	.	.	G	W	K	T	T	.	C	Y	K	C	.	-	-	-	-	-	-	-	-	-	-	-	-	-
Ab9	-1	0	0	0	-	-	-	-	-	-	-	-	-	-	-	-	-	-	-	-	.	G	.	.	.	G	-	-	-	-	.	C	.	G	C	.	-	-	-	-	-	-	-	-	-	-	-	-	-
Ab10	-1	0	0	0	-	-	-	-	-	-	-	-	-	-	-	-	-	-	-	-	.	G	.	.	.	G	-	-	-	-	.	C	.	G	C	.	-	-	-	-	-	-	-	-	-	-	-	-	-
Ab11	-1	0	0	0	A	C	C	T	A	C	A	G	G	A	G	C	G	G	G	T	.	A	.	A	A	A	A	A	A	A	G	T	T	G	C	T	T	C	C	C	A	T	A	C	-	-	-	-	-
Ab12	-1	0	0	0	-	-	-	-	-	-	-	-	-	-	-	-	-	-	-	-	.	G	.	.	.	G	-	-	-	-	.	C	.	G	C	.	-	-	-	-	-	-	-	-	-	-	-	-	-
Ab13	-1	0	0	0	A	C	C	C	T	C	M	G	C	A	G	C	G	G	G	T	.	R	S	R	W	R	A	M	G	T	G	A	-	G	C	T	T	C	C	Y	A	T	A	C	A	-	-	-	-
Ab14	-1	0	0	0	-	-	-	-	-	-	-	-	-	-	-	-	-	-	-	-	T	C	Y	.	W	K	G	Y	T	T	.	S	G	G	S	.	-	-	-	-	-	-	-	-	-	-	-	-	-
G16	-1	0	0	0	-	-	-	-	-	-	-	-	-	-	-	-	-	-	-	-	.	G	.	.	.	G	-	-	-	-	S	C	.	G	.	.	-	-	-	-	-	-	-	-	-	-	-	-	-
G17	-1	0	0	0	-	-	-	-	-	-	-	-	-	-	-	-	-	-	-	-	S	G	K	.	.	G	-	-	-	-	S	C	.	C	C	.	-	-	-	-	-	-	-	-	-	-	-	-	-
Ab19	-1	0	0	0	-	-	-	-	-	-	-	-	-	-	-	-	-	-	-	-	.	G	.	.	.	G	-	-	-	-	.	C	.	G	C	.	-	-	-	-	-	-	-	-	-	-	-	-	-
Ab20	-1	0	0	0	-	-	-	-	-	-	-	-	-	-	-	-	-	-	-	-	.	G	.	.	.	G	-	-	-	-	.	C	.	G	C	.	-	-	-	-	-	-	-	-	-	-	-	-	-
Ab21	-1	0	0	0	-	-	-	-	-	-	-	-	-	-	-	-	-	-	-	-	R	R	.	.	K	K	-	-	-	-	S	S	Y	G	C	.	-	-	-	-	-	-	-	-	-	-	-	-	-
B22	-1	0	0	0	-	-	-	-	-	-	-	-	-	-	-	-	-	-	-	-	.	G	S	.	.	G	-	-	-	-	.	C	.	.	C	.	-	-	-	-	-	-	-	-	-	-	-	-	-
B24	-1	0	0	0	-	-	-	-	-	-	-	-	-	-	-	-	-	-	-	-	.	G	.	.	.	G	-	-	-	-	.	C	.	G	C	.	-	-	-	-	-	-	-	-	-	-	-	-	-
B25	-1	0	0	0	-	-	-	-	-	-	-	-	-	-	-	-	-	-	-	-	.	G	.	.	.	G	-	-	-	-	.	C	.	.	C	.	-	-	-	-	-	-	-	-	-	-	-	-	-
B26	-1	0	0	0	-	-	-	-	-	-	-	-	-	-	-	-	-	-	-	-	.	G	.	.	.	G	-	-	-	-	S	C	.	G	C	.	-	-	-	-	-	-	-	-	-	-	-	-	-
B27	-1	0	0	0	-	-	-	-	-	-	-	-	-	-	-	-	-	-	-	-	.	G	.	.	.	G	-	-	-	-	.	C	.	G	C	.	-	-	-	-	-	-	-	-	-	-	-	-	-
B28	-1	0	0	0	-	-	-	-	-	-	-	-	-	-	-	-	-	-	-	-	.	G	.	.	.	G	-	-	-	-	.	C	.	G	C	.	-	-	-	-	-	-	-	-	-	-	-	-	-
B29	-1	0	0	0	-	-	-	-	-	-	-	-	-	-	-	-	-	-	-	-	.	G	.	.	.	G	-	-	-	-	.	C	.	G	C	.	G	G	C	T	G	C	C	C	C	T	C	C	T
B30	-1	0	0	0	-	-	-	-	-	-	-	-	-	-	-	-	-	-	-	-	.	G	S	.	.	G	-	-	-	-	.	C	.	.	C	.	-	-	-	-	-	-	-	-	-	-	-	-	-
B32	-1	0	0	0	-	-	-	-	-	-	-	-	-	-	-	-	-	-	-	-	.	G	.	.	.	G	-	-	-	-	.	C	.	G	C	.	-	-	-	-	-	-	-	-	-	-	-	-	-
B33	-1	0	0	0	T	G	T	A	C	C	C	T	G	T	T	G	C	T	T	C	.	G	.	.	.	G	-	-	-	-	.	C	.	G	C	.	-	-	-	-	-	-	-	-	-	-	-	-	-
B34	-1	0	0	0	-	-	-	-	-	-	-	-	-	-	-	-	-	-	-	-	-	G	Y	.	.	G	-	-	-	-	G	C	.	G	C	.	-	-	-	-	-	-	-	-	-	-	-	-	-
B35	-1	0	0	0	-	-	-	-	-	-	-	-	-	-	-	-	-	-	-	-	-	.	T	.	.	G	-	-	-	-	.	C	.	G	C	.	-	-	-	-	-	-	-	-	-	-	-	-	-
B36	-1	0	0	0	-	-	-	-	-	-	-	-	-	-	-	-	-	-	-	-	.	G	S	.	.	.	-	-	-	-	.	C	.	G	C	.	-	-	-	-	-	-	-	-	-	-	-	-	-
B37	-1	0	0	0	-	-	-	-	-	-	-	-	-	-	-	-	-	-	-	-	.	G	.	.	.	G	-	-	-	-	.	C	.	G	C	.	-	-	-	-	-	-	-	-	-	-	-	-	-
B38	-1	0	0	0	-	-	-	-	-	-	-	-	-	-	-	-	-	-	-	-	S	G	K	.	.	G	-	-	-	-	S	C	.	.	C	.	-	-	-	-	-	-	-	-	-	-	-	-	-
B39	-1	0	0	0	-	-	-	-	-	-	-	-	-	-	-	-	-	-	-	-	.	G	.	.	.	.	-	-	-	-	.	C	.	R	C	M	-	-	-	-	-	-	-	-	-	-	-	-	-
B41	-1	0	0	0	-	-	-	-	-	-	-	-	-	-	-	-	-	-	-	-	.	G	.	.	.	G	-	-	-	-	.	C	.	G	C	.	-	-	-	-	-	-	-	-	-	-	-	-	-
B42	-1	0	0	0	-	-	-	-	-	-	-	-	-	-	-	-	-	-	-	-	.	G	.	.	.	G	-	-	-	-	.	C	.	G	C	.	-	-	-	-	-	-	-	-	-	-	-	-	-
B43	-1	0	0	0	-	-	-	-	-	-	-	-	-	-	-	-	-	-	-	-	C	G	G	.	.	G	-	-	-	-	.	T	.	C	C	.	G	G	G	T	G	C	C	C	C	T	Y	C	T
B44	-1	0	0	0	-	-	-	-	-	-	-	-	-	-	-	-	-	-	-	-	.	G	.	.	.	G	-	-	-	-	.	C	.	G	C	.	-	-	-	-	-	-	-	-	-	-	-	-	-
D48	-1	0	0	0	-	-	-	-	-	-	-	-	-	-	-	-	-	-	-	-	.	G	.	.	.	G	-	-	-	-	.	C	.	G	C	.	-	-	-	-	-	-	-	-	-	-	-	-	-
D49	-1	0	0	0	-	-	-	-	-	-	-	-	-	-	-	-	-	-	-	-	.	G	.	.	.	G	-	-	-	-	.	C	.	G	C	.	G	G	C	T	G	C	C	C	C	T	C	C	T
D50	-1	0	0	0	-	-	-	-	-	-	-	-	-	-	-	-	-	-	-	-	.	G	.	.	.	G	-	-	-	-	.	C	.	G	C	.	G	G	C	T	G	C	C	C	C	T	C	C	T
D51	-1	0	0	0	-	-	-	-	-	-	-	-	-	-	-	-	-	-	-	-	.	G	.	.	.	G	-	-	-	-	G	C	.	G	C	.	-	-	-	-	-	-	-	-	-	-	-	-	-
D52	-1	0	0	0	-	-	-	-	-	-	-	-	-	-	-	-	-	-	-	-	.	G	.	.	.	G	-	-	-	-	.	C	.	G	C	.	G	G	C	T	G	C	C	C	C	T	C	C	T
D53	-1	0	0	0	-	-	-	-	-	-	-	-	-	-	-	-	-	-	-	-	.	G	.	.	.	G	-	-	-	-	.	C	.	G	C	.	-	-	-	-	-	-	-	-	-	-	-	-	-
D54	-1	0	0	0	-	-	-	-	-	-	-	-	-	-	-	-	-	-	-	-	.	G	.	.	.	G	-	-	-	-	.	C	.	G	C	.	-	-	-	-	-	-	-	-	-	-	-	-	-
D55	-1	0	0	0	A	C	C	T	A	C	A	G	G	A	G	C	G	G	G	T	.	A	.	A	A	A	A	A	-	-	G	T	T	G	C	T	T	C	C	C	A	T	A	C	-	-	-	-	-
D56	-1	0	0	0	-	-	-	-	-	-	-	-	-	-	-	-	-	-	-	-	.	G	T	.	.	G	-	-	-	-	G	C	Y	Y	C	.	-	-	-	-	-	-	-	-	-	-	-	-	-
E57	-1	0	0	0	-	-	-	-	-	-	-	-	-	-	-	-	-	-	-	-	.	G	.	.	.	G	-	-	-	-	.	C	.	G	C	.	G	G	C	T	G	C	C	C	C	T	C	C	T
E58	-1	0	0	0	-	-	-	-	-	-	-	-	-	-	-	-	-	-	-	-	.	G	.	.	.	G	-	-	-	-	.	C	.	G	C	.	G	G	C	T	G	C	C	C	C	T	C	C	T
F59	-1	0	0	0	-	-	-	-	-	-	-	-	-	-	-	-	-	-	-	-	.	G	S	.	.	G	-	-	-	-	.	C	.	.	C	.	G	G	S	T	G	C	C	C	C	Y	C	C	T
F60	-1	0	0	0	-	-	-	-	-	-	-	-	-	-	-	-	-	-	-	-	.	G	S	.	T	G	-	-	-	-	S	C	.	A	C	G	-	-	-	-	-	-	-	-	-	-	-	-	-
F61	-1	0	0	0	-	-	-	-	-	-	-	-	-	-	-	-	-	-	-	-	.	G	.	.	.	G	-	-	-	-	.	C	.	G	C	.	-	-	-	-	-	-	-	-	-	-	-	-	-
F62	-1	0	0	0	-	-	-	-	-	-	-	-	-	-	-	-	-	-	-	-	.	G	.	.	.	G	-	-	-	-	.	C	.	G	C	.	G	G	C	T	G	C	C	C	C	T	C	C	-
F63	-1	0	0	0	-	-	-	-	-	-	-	-	-	-	-	-	-	-	-	-	.	G	.	.	.	G	-	-	-	-	.	C	.	G	C	.	G	G	C	T	G	C	C	C	C	T	C	C	T
G64	-1	0	0	0	-	-	-	-	-	-	-	-	-	-	-	-	-	-	-	-	.	G	.	.	.	G	-	-	-	-	.	C	.	G	C	.	G	G	C	T	G	C	C	C	C	T	C	C	T
G65	-1	0	0	0	-	-	-	-	-	-	-	-	-	-	-	-	-	-	-	-	.	G	.	.	.	G	-	-	-	-	.	C	.	G	C	.	-	-	-	-	-	-	-	-	-	-	-	-	-
G66	-1	0	0	0	-	-	-	-	-	-	-	-	-	-	-	-	-	-	-	-	.	G	.	.	.	G	-	-	-	-	.	C	.	G	C	.	-	-	-	-	-	-	-	-	-	-	-	-	-
G67	-1	0	0	0	-	-	-	-	-	-	-	-	-	-	-	-	-	-	-	-	.	G	S	.	.	G	-	-	-	-	S	C	.	Y	S	.	-	-	-	-	-	-	-	-	-	-	-	-	-
G68	-1	0	0	0	-	-	-	-	-	-	-	-	-	-	-	-	-	-	-	-	.	G	S	.	.	G	-	-	-	-	.	C	.	G	C	.	G	G	C	T	G	C	C	C	C	T	C	C	T
G69	-1	0	0	0	-	-	-	-	-	-	-	-	-	-	-	-	-	-	-	-	.	G	.	.	.	G	-	-	-	-	.	C	.	G	C	.	-	-	-	-	-	-	-	-	-	-	-	-	-
G70	-1	0	0	0	-	-	-	-	-	-	-	-	-	-	-	-	-	-	-	-	S	G	S	.	.	G	-	-	-	-	.	.	Y	.	C	.	G	G	S	T	G	C	C	C	C	T	C	C	T
J74	-1	0	0	0	-	-	-	-	-	-	-	-	-	-	-	-	-	-	-	-	.	G	Y	.	.	G	-	-	-	-	S	C	.	G	C	.	-	-	-	-	-	-	-	-	-	-	-	-	-
J76	-1	0	0	0	-	-	-	-	-	-	-	-	-	-	-	-	-	-	-	-	.	G	.	.	.	G	-	-	-	-	.	C	.	G	C	.	G	G	C	T	G	C	C	C	C	T	C	C	T
J77	-1	0	0	0	-	-	-	-	-	-	-	-	-	-	-	-	-	-	-	-	.	G	.	.	.	G	-	-	-	-	.	C	.	G	C	.	G	G	C	T	G	C	C	C	C	T	C	C	T
J78	-1	0	0	0	-	-	-	-	-	-	-	-	-	-	-	-	-	-	-	-	R	G	S	.	.	.	-	-	-	-	M	C	.	W	C	.	-	-	-	-	-	-	-	-	-	-	-	-	-
J79	-1	0	0	0	-	-	-	-	-	-	-	-	-	-	-	-	-	-	-	-	.	G	.	.	.	G	-	-	-	-	.	C	.	G	C	.	-	-	-	-	-	-	-	-	-	-	-	-	-
J80	-1	0	0	0	-	-	-	-	-	-	-	-	-	-	-	-	-	-	-	-	.	G	.	.	.	G	-	-	-	-	.	C	.	G	C	.	-	-	-	-	-	-	-	-	-	-	-	-	-
J81	-1	0	0	0	-	-	-	-	-	-	-	-	-	-	-	-	-	-	-	-	.	G	.	.	.	G	-	-	-	-	.	C	.	K	C	.	-	-	-	-	-	-	-	-	-	-	-	-	-
J82	-1	0	0	0	-	-	-	-	-	-	-	-	-	-	-	-	-	-	-	-	.	G	.	.	.	G	-	-	-	-	.	C	.	G	C	.	-	-	-	-	-	-	-	-	-	-	-	-	-
J83	-1	0	0	0	-	-	-	-	-	-	-	-	-	-	-	-	-	-	-	-	.	G	.	.	.	G	-	-	-	-	.	C	.	G	C	.	-	-	-	-	-	-	-	-	-	-	-	-	-
J84	-1	0	0	0	-	-	-	-	-	-	-	-	-	-	-	-	-	-	-	-	.	G	.	.	.	G	-	-	-	-	.	C	.	G	C	.	-	-	-	-	-	-	-	-	-	-	-	-	-
J85	-1	0	0	0	-	-	-	-	-	-	-	-	-	-	-	-	-	-	-	-	.	G	.	.	.	G	-	-	-	-	.	C	.	G	C	.	-	-	-	-	-	-	-	-	-	-	-	-	-
F86	-1	0	0	0	-	-	-	-	-	-	-	-	-	-	-	-	-	-	-	-	.	G	.	.	.	G	-	-	-	-	.	C	.	G	C	.	-	-	-	-	-	-	-	-	-	-	-	-	-
KU855474.1	-1	0	0	0	-	-	-	-	-	-	-	-	-	-	-	-	-	-	-	-	.	G	.	C	A	A	M	A	A	-	.	C	A	A	C	.	-	-	-	-	-	-	-	-	-	-	-	-	-
	3	3	3	3	3	3	3	3	3	3	3	3	3	3	3	3	3	3	3	3	3	3	3	3	3	3	3	3	3	3	3	3	3	3	3	3	3	3	3	3	3	3	3	3	3	3	3	3	3
	1	1	1	1	1	1	1	2	2	2	2	2	2	2	2	2	2	3	3	3	3	3	3	3	3	3	3	4	4	4	4	4	4	4	4	4	4	5	5	5	5	5	5	5	5	5	5	6	6
	3	4	5	6	7	8	9	0	1	2	3	4	5	6	7	8	9	0	1	2	3	4	5	6	7	8	9	0	1	2	3	4	5	6	7	8	9	0	1	2	3	4	5	6	7	8	9	0	1
Ab1	-1	0	0	0	-	-	C	C	C	C	C	G	G	-	-	G	M	C	C	-	-	G	T	G	Y	C	C	R	-	Y	-	-	-	-	-	-	M	R	R	A	K	A	C	-	-	-	-	-	M
Ab2	-1	0	0	0	-	-	.	.	.	.	.	.	.	-	-	.	C	.	.	-	-	.	.	.	C	.	.	G	-	C	-	-	-	-	-	-	C	G	G	.	G	.	.	-	-	-	-	-	C
Ab3	-1	0	0	0	-	-	.	.	.	M	.	.	.	-	-	.	C	.	.	-	-	S	.	S	C	.	.	G	-	M	-	-	-	-	-	-	C	S	G	M	G	.	.	-	-	-	-	-	C
Ab4	-1	0	0	0	-	-	.	.	.	.	.	.	.	-	-	.	C	.	.	-	-	.	C	.	C	.	.	S	-	C	-	-	-	-	-	-	C	G	G	.	R	.	.	-	-	-	-	-	T
Ab6	-1	0	0	0	-	-	S	.	.	.	K	S	K	-	-	.	S	.	.	-	-	-	-	.	S	Y	.	G	A	S	A	-	-	-	-	-	C	S	G	G	R	.	.	-	-	-	-	A	C
Ab7	-1	0	0	0	-	-	.	.	.	.	S	.	.	-	-	.	C	A	.	T	-	.	C	A	C	.	.	.	-	.	-	-	-	-	-	-	C	K	G	.	A	R	S	-	-	-	-	-	C
Ab8	-1	0	0	0	-	-	.	.	.	.	.	.	.	-	-	.	C	.	.	-	-	.	.	S	C	.	.	G	-	C	-	-	-	-	-	-	C	G	G	.	G	.	.	-	-	-	-	-	C
Ab9	-1	0	0	0	-	-	.	.	.	.	.	.	.	-	-	.	C	.	.	-	-	.	.	.	C	.	.	G	-	C	-	-	-	-	-	-	C	G	G	.	G	.	.	-	-	-	-	-	C
Ab10	-1	0	0	0	-	-	.	.	.	.	.	.	.	-	-	.	C	.	.	-	-	.	.	.	C	.	.	G	-	C	-	-	-	-	-	-	C	G	G	.	G	.	.	-	-	-	-	-	C
Ab11	-1	0	0	0	-	C	.	T	T	T	.	.	.	-	-	S	C	.	.	-	-	.	.	C	C	.	.	T	T	-	-	-	-	G	G	G	G	G	G	G	G	.	.	G	G	G	G	G	C
Ab12	-1	0	0	0	-	-	.	.	.	.	.	.	.	-	-	.	C	.	.	-	-	.	.	.	C	.	.	G	-	C	-	-	-	-	-	-	C	G	G	.	G	.	.	-	-	-	-	-	C
Ab13	-1	0	0	0	G	Y	Y	T	T	T	.	.	.	-	-	.	C	.	.	-	-	S	Y	Y	.	.	S	K	T	C	C	Y	G	G	G	M	S	G	G	G	.	R	G	G	G	G	G	G	C
Ab14	-1	0	0	0	-	-	M	.	.	Y	G	.	.	G	-	-	-	-	-	-	-	A	Y	S	S	M	.	G	G	R	G	-	-	-	-	-	G	.	A	.	S	G	.	Y	T	T	C	A	T
G16	-1	0	0	0	-	-	.	.	.	.	.	.	.	-	-	.	C	.	.	-	-	.	.	.	C	.	.	G	-	M	-	-	-	-	-	-	C	G	G	.	G	.	.	-	-	-	-	-	C
G17	-1	0	0	0	-	-	.	.	.	.	Y	.	.	-	-	.	.	.	M	-	-	R	Y	.	C	.	.	S	-	.	-	-	-	-	-	-	C	G	G	.	S	M	.	-	-	-	-	-	C
Ab19	-1	0	0	0	-	-	.	.	.	.	.	.	.	-	-	.	C	.	.	-	-	.	.	.	C	.	.	G	-	C	-	-	-	-	-	-	C	G	G	.	G	.	.	-	-	-	-	-	C
Ab20	-1	0	0	0	-	-	.	.	.	.	.	.	.	-	-	.	S	.	.	-	-	.	W	.	C	.	.	G	-	C	-	-	-	-	-	-	C	G	G	.	G	.	.	-	-	-	-	-	C
Ab21	-1	0	0	0	-	-	.	M	S	.	S	.	.	-	-	.	C	.	.	-	-	.	Y	S	C	.	.	G	-	C	-	-	-	-	-	-	C	.	G	.	G	R	M	-	-	-	-	-	C
B22	-1	0	0	0	-	-	.	.	.	.	.	.	.	-	-	.	S	.	.	-	-	S	.	.	T	.	.	C	S	C	-	-	-	-	-	-	C	G	G	.	G	.	.	-	-	-	-	-	C
B24	-1	0	0	0	-	-	.	.	.	.	.	.	.	-	-	.	C	.	.	-	-	.	.	.	C	.	.	G	-	C	-	-	-	-	-	-	C	G	G	.	G	.	.	-	-	-	-	-	-
B25	-1	0	0	0	-	-	.	.	.	.	.	.	.	-	-	.	C	.	.	-	-	.	.	.	C	.	.	G	-	C	-	-	-	-	-	-	C	G	G	.	G	.	.	-	-	-	-	-	C
B26	-1	0	0	0	-	-	.	.	.	.	.	.	.	-	-	.	C	.	.	-	-	.	.	.	C	.	.	G	-	C	-	-	-	-	-	-	C	G	G	.	G	.	.	-	-	-	-	-	C
B27	-1	0	0	0	-	-	M	.	M	.	.	.	K	C	T	.	.	M	S	-	-	.	.	K	S	.	M	G	-	.	-	-	-	-	-	-	C	K	G	.	G	.	.	-	-	-	-	-	C
B28	-1	0	0	0	-	-	.	.	.	.	.	.	.	-	-	.	C	.	.	-	-	.	.	.	C	.	.	G	-	C	-	-	-	-	-	-	C	G	G	.	G	.	.	-	-	-	-	-	C
B29	-1	0	0	0	-	-	.	.	.	.	.	.	.	-	-	.	C	.	.	-	-	.	.	.	C	.	.	G	-	C	-	-	-	-	-	-	C	G	G	G	G	.	.	-	-	-	-	-	A
B30	-1	0	0	0	-	-	.	.	.	.	.	.	.	-	-	.	.	M	S	-	-	.	.	.	-	.	S	C	S	C	-	-	-	-	-	-	S	G	G	R	G	.	.	-	-	-	-	-	C
B32	-1	0	0	0	-	-	.	.	.	.	.	.	.	-	-	.	C	.	.	-	-	.	.	.	C	.	.	G	-	C	-	-	-	-	-	-	C	G	G	.	G	.	.	-	-	-	-	-	C
B33	-1	0	0	0	-	-	.	.	.	.	.	.	.	-	-	.	C	.	.	-	-	.	.	.	C	.	.	G	-	C	-	-	-	-	-	-	C	G	G	.	G	.	.	C	T	-	C	A	A
B34	-1	0	0	0	-	-	.	.	.	.	.	.	.	-	-	S	R	S	R	-	-	S	.	S	C	.	.	S	-	C	-	-	-	-	-	-	C	G	G	.	G	G	M	-	-	-	-	-	C
B35	-1	0	0	0	-	-	Y	.	.	.	.	.	.	-	-	.	S	.	S	-	-	.	W	S	C	.	.	S	-	C	-	-	-	-	-	-	C	G	G	.	R	R	M	-	-	-	-	-	C
B36	-1	0	0	0	-	-	Y	.	.	.	Y	.	.	-	-	.	C	S	S	-	-	S	.	.	.	.	.	G	-	S	-	-	-	-	-	-	C	G	G	.	G	.	.	-	-	-	-	-	C
B37	-1	0	0	0	-	-	.	.	.	.	.	.	.	-	-	.	C	.	.	-	-	.	.	.	C	.	.	G	-	C	-	-	-	-	-	-	C	G	G	.	G	.	.	-	-	-	-	-	C
B38	-1	0	0	0	-	-	.	.	.	.	.	.	.	-	-	.	.	.	.	-	-	S	.	S	C	.	.	S	-	C	-	-	-	-	-	-	S	G	G	.	G	.	.	-	-	-	-	-	C
B39	-1	0	0	0	-	-	.	.	.	.	.	.	.	-	-	.	C	.	.	-	-	.	C	.	C	.	.	G	-	C	-	-	-	-	-	-	C	K	.	.	G	.	.	-	-	-	-	-	T
B41	-1	0	0	0	-	-	.	.	S	S	.	.	.	-	-	.	.	.	.	-	-	.	W	.	C	.	.	G	-	C	-	-	-	-	-	-	C	G	G	.	G	M	.	-	-	-	-	-	C
B42	-1	0	0	0	-	-	.	.	.	.	.	.	.	-	-	.	C	.	.	-	-	.	C	.	C	.	.	G	-	C	-	-	-	-	-	-	C	G	G	.	G	.	.	C	T	-	C	A	A
B43	-1	0	0	0	-	-	K	S	.	.	.	.	.	-	-	.	S	.	.	G	M	.	.	.	S	M	S	M	-	C	-	-	-	-	-	-	G	G	G	G	G	.	.	-	-	-	-	-	C
B44	-1	0	0	0	-	-	.	.	.	.	.	.	.	-	-	.	C	.	.	-	-	.	.	.	C	.	.	G	-	C	-	-	-	-	-	-	C	G	G	.	G	.	.	C	T	-	C	A	A
D48	-1	0	0	0	-	-	.	.	.	.	.	.	.	-	-	.	C	.	.	-	-	.	.	.	C	.	.	G	-	C	-	-	-	-	-	-	C	G	G	.	G	.	.	C	T	-	C	A	A
D49	-1	0	0	0	-	-	.	.	.	.	.	.	.	-	-	.	C	.	.	-	-	.	.	.	C	.	.	G	-	C	-	-	-	-	-	-	C	G	G	G	G	.	.	-	-	-	-	-	A
D50	-1	0	0	0	-	-	.	.	.	.	.	.	.	-	-	.	C	.	.	-	-	.	.	.	C	.	.	G	-	C	-	-	-	-	-	-	C	G	G	G	G	.	.	-	-	-	-	-	A
D51	-1	0	0	0	-	-	.	.	.	T	A	C	T	-	-	.	A	.	.	-	-	K	C	R	M	M	.	.	-	C	-	-	-	-	-	-	C	G	.	.	A	.	.	A	K	-	T	T	Y
D52	-1	0	0	0	-	-	.	.	.	.	.	.	.	-	-	.	C	.	.	-	-	.	.	.	C	.	.	G	-	C	-	-	-	-	-	-	C	G	G	G	G	.	.	-	-	-	-	-	A
D53	-1	0	0	0	-	-	.	.	.	.	.	.	.	-	-	.	C	.	.	-	-	.	.	.	C	.	.	G	-	C	-	-	-	-	-	-	C	G	G	.	G	.	.	-	-	-	-	-	C
D54	-1	0	0	0	-	-	.	.	.	.	.	.	.	-	-	.	C	.	.	-	-	.	.	.	C	.	.	G	-	C	-	-	-	-	-	-	C	G	G	.	G	.	.	-	-	-	-	-	C
D55	-1	0	0	0	-	C	.	T	T	T	.	.	.	-	-	.	C	.	.	-	-	.	.	C	C	.	.	T	T	C	C	T	G	G	G	A	G	G	G	G	G	.	.	G	G	G	G	G	C
D56	-1	0	0	0	-	-	S	.	.	.	.	.	.	-	-	K	C	.	.	-	-	Y	C	.	C	.	.	C	-	C	-	-	-	-	-	-	C	G	G	.	S	.	.	-	-	-	-	-	Y
E57	-1	0	0	0	-	-	.	.	.	.	.	.	.	-	-	.	C	.	.	-	-	.	.	.	C	.	.	G	-	C	-	-	-	-	-	-	C	G	G	G	G	.	.	-	-	-	-	-	A
E58	-1	0	0	0	-	-	.	.	.	.	.	.	.	-	-	.	C	.	.	-	-	.	.	.	C	.	.	G	-	C	-	-	-	-	-	-	C	G	G	G	G	.	.	-	-	-	-	-	A
F59	-1	0	0	0	-	-	S	.	.	.	.	S	.	-	-	.	C	.	.	-	-	.	.	.	C	.	.	G	-	C	-	-	-	-	-	-	C	G	G	G	G	.	.	-	-	-	-	-	A
F60	-1	0	0	0	-	-	-	-	-	-	-	-	-	-	-	-	-	-	-	-	-	-	-	.	C	.	.	G	-	C	-	-	-	-	-	-	C	G	A	.	G	.	.	-	-	-	-	-	-
F61	-1	0	0	0	-	-	.	.	.	.	.	.	.	-	-	.	C	.	.	-	-	.	C	.	C	.	.	G	-	C	-	-	-	-	-	-	C	G	G	.	G	.	.	-	-	-	-	-	T
F62	-1	0	0	0	-	-	T	.	.	.	.	-	-	-	-	-	C	.	A	G	A	A	G	.	A	T	.	A	T	T	C	-	-	-	-	-	C	G	G	G	G	G	A	-	-	-	-	-	T
F63	-1	0	0	0	-	-	.	.	.	.	.	.	.	-	-	.	C	.	.	-	-	.	.	.	C	.	.	G	-	C	-	-	-	-	-	-	C	G	G	G	G	.	.	-	-	-	-	-	A
G64	-1	0	0	0	-	-	.	.	.	.	.	.	.	-	-	.	C	.	.	-	-	.	.	.	C	.	.	G	-	C	-	-	-	-	-	-	C	G	G	G	G	.	.	-	-	-	-	-	A
G65	-1	0	0	0	-	-	.	.	.	.	.	.	.	-	-	.	C	.	.	-	-	.	.	.	C	.	.	G	-	C	-	-	-	-	-	-	C	G	G	.	G	.	.	-	-	-	-	-	C
G66	-1	0	0	0	-	-	.	.	.	.	.	.	.	-	-	.	C	.	.	-	-	.	.	.	C	.	.	G	-	C	-	-	-	-	-	-	C	G	G	.	G	.	.	-	-	-	-	-	C
G67	-1	0	0	0	-	-	.	.	.	.	.	.	.	-	-	.	S	.	.	-	-	S	C	.	C	.	.	S	-	C	-	-	-	-	-	-	C	G	G	.	G	.	.	-	-	-	-	-	T
G68	-1	0	0	0	-	-	.	.	.	.	.	.	.	-	-	.	C	.	.	-	-	.	.	.	C	.	.	G	-	C	-	-	-	-	-	-	C	G	G	G	G	.	.	-	-	-	-	-	A
G69	-1	0	0	0	-	-	.	.	.	.	.	.	.	-	-	.	C	.	.	-	-	.	.	.	C	.	.	G	-	C	-	-	-	-	-	-	C	G	G	.	G	.	.	C	T	-	C	A	A
G70	-1	0	0	0	-	-	.	.	.	.	.	.	.	-	-	.	C	.	.	-	-	.	.	.	C	.	.	G	-	C	-	-	-	-	-	-	C	G	K	G	G	.	.	-	-	-	-	-	A
J74	-1	0	0	0	-	-	.	.	.	.	.	.	.	-	-	.	Y	.	.	-	-	.	C	.	C	.	.	G	-	C	-	-	-	-	-	-	C	G	G	.	G	.	.	-	-	-	-	-	T
J76	-1	0	0	0	-	-	.	.	.	.	.	.	.	-	-	.	C	.	.	-	-	.	.	.	C	.	.	G	-	C	-	-	-	-	-	-	C	G	G	G	G	.	.	-	-	-	-	-	A
J77	-1	0	0	0	-	-	.	.	.	.	.	.	.	-	-	.	C	.	.	-	-	.	.	.	C	.	.	G	-	C	-	-	-	-	-	-	C	G	G	G	G	.	.	-	-	-	-	-	A
J78	-1	0	0	0	-	-	.	.	.	.	.	.	.	-	-	.	.	.	.	-	-	R	W	.	C	.	.	G	-	C	-	-	-	-	-	-	C	G	G	.	G	.	.	-	-	-	-	-	.
J79	-1	0	0	0	-	-	.	.	.	.	.	.	.	-	-	.	C	.	.	-	-	.	.	.	C	.	.	G	-	C	-	-	-	-	-	-	C	G	G	.	G	.	.	-	-	-	-	-	C
J80	-1	0	0	0	-	-	.	.	.	.	.	.	.	-	-	.	Y	.	.	-	-	.	C	.	C	.	.	K	-	C	-	-	-	-	-	-	C	G	G	.	G	.	.	-	-	-	-	-	T
J81	-1	0	0	0	-	-	.	.	.	.	.	.	.	-	-	.	C	.	.	-	-	.	.	.	C	.	S	G	A	C	-	-	-	-	-	-	C	G	G	.	G	.	.	-	-	-	-	-	C
J82	-1	0	0	0	-	-	.	.	.	.	.	.	.	-	-	.	C	.	.	-	-	.	.	.	C	.	.	G	-	C	-	-	-	-	-	-	C	G	G	.	G	.	.	C	T	-	C	A	A
J83	-1	0	0	0	-	-	.	.	.	.	.	.	.	-	-	.	C	.	.	-	-	.	.	.	C	.	.	G	-	C	-	-	-	-	-	-	C	G	G	.	G	.	.	C	T	-	C	A	A
J84	-1	0	0	0	-	-	.	.	.	.	.	.	.	-	-	.	C	.	.	-	-	.	.	.	C	.	.	G	-	C	-	-	-	-	-	-	C	G	G	.	G	.	.	C	T	-	C	A	A
J85	-1	0	0	0	-	-	.	.	.	.	.	.	.	-	-	.	C	.	.	-	-	.	.	.	C	.	.	G	-	C	-	-	-	-	-	-	C	G	G	.	G	.	.	-	-	-	-	-	C
F86	-1	0	0	0	-	-	.	.	.	.	.	.	.	-	-	.	C	.	.	-	-	.	.	.	C	.	.	G	-	C	-	-	-	-	-	-	C	G	G	.	G	.	.	C	T	-	C	A	A
KU855474.1	-1	0	0	0	A	A	.	A	T	A	A	A	.	-	-	A	A	A	.	G	A	.	C	T	T	.	T	G	-	-	-	-	-	-	-	-	C	T	G	C	G	G	.	-	-	-	-	-	C
	3	3	3	3	3	3	3	3	3	4	4	4	4	4	4	4	4	4	4	4	4	4	4	4	4	4	4	4	4	4	4	4	4	4	4	4	4	4	4	4	4	4	4	4	4	4	4	4	4
	9	9	9	9	9	9	9	9	9	0	0	0	0	0	0	0	0	0	0	1	1	1	1	1	1	1	1	1	1	2	2	2	2	2	2	2	2	2	2	3	3	3	3	3	3	3	3	3	3
	1	2	3	4	5	6	7	8	9	0	1	2	3	4	5	6	7	8	9	0	1	2	3	4	5	6	7	8	9	0	1	2	3	4	5	6	7	8	9	0	1	2	3	4	5	6	7	8	9
Ab1	-1	0	0	0	-	-	-	-	-	-	-	-	-	-	-	-	-	-	-	-	-	-	-	-	-	-	G	A	A	C	A	S	T	G	-	-	-	-	T	Y	T	M	W	-	-	W	G	-	G
Ab2	-1	0	0	0	-	-	-	-	-	-	-	-	-	-	-	-	-	-	-	-	-	-	-	-	-	-	.	.	.	.	.	C	.	.	-	-	-	-	.	.	.	G	A	-	-	A	.	-	.
Ab3	-1	0	0	0	-	-	-	-	-	-	-	-	-	-	-	-	-	-	-	-	-	-	-	-	-	-	.	.	.	.	.	C	.	.	-	-	-	-	.	C	W	G	A	-	-	A	.	-	.
Ab4	-1	0	0	0	-	-	-	-	-	-	-	-	-	-	-	-	-	-	-	-	-	-	-	-	-	-	.	.	.	.	.	C	.	.	-	-	-	-	.	C	.	R	A	-	-	A	.	-	.
Ab6	-1	0	0	0	-	-	-	-	-	-	-	-	-	-	-	-	-	-	-	-	-	-	-	-	-	-	.	R	.	.	.	C	.	.	-	-	-	-	.	S	.	G	A	-	-	A	R	-	.
Ab7	-1	0	0	0	-	-	-	-	-	-	-	-	-	-	-	-	-	-	-	-	-	-	-	-	-	-	-	-	.	.	R	A	.	A	-	-	-	-	.	T	.	G	A	-	-	A	.	-	A
Ab8	-1	0	0	0	-	-	-	-	-	-	-	-	-	-	-	-	-	-	-	-	-	-	-	-	-	-	.	.	.	.	R	C	.	.	-	-	-	-	.	C	.	G	A	-	-	A	K	-	.
Ab9	-1	0	0	0	-	-	-	-	-	-	-	-	-	-	-	-	-	-	-	-	-	-	-	-	-	-	.	.	.	.	.	C	.	.	-	-	-	-	.	C	.	G	A	-	-	A	.	-	.
Ab10	-1	0	0	0	-	-	-	-	-	-	-	-	-	-	-	-	-	-	-	-	-	-	-	-	-	-	.	.	.	.	.	C	.	.	-	-	-	-	.	C	.	G	A	-	-	A	.	-	.
Ab11	-1	0	0	0	-	-	-	-	-	-	-	-	-	-	-	-	-	-	S	C	T	K	A	G	G	G	C	.	G	.	.	A	.	.	R	C	G	C	.	M	G	R	A	C	A	G	S	C	A
Ab12	-1	0	0	0	-	-	-	-	-	-	-	-	-	-	-	-	-	-	-	-	-	-	-	-	-	-	.	.	.	.	.	C	.	.	-	-	-	-	.	C	.	G	A	-	-	A	.	-	.
Ab13	-1	0	0	0	-	-	-	-	-	-	-	-	-	-	-	-	-	-	Y	Y	S	S	A	R	G	G	M	.	C	M	.	A	K	.	A	S	S	K	.	M	G	.	A	C	A	G	.	C	A
Ab14	-1	0	0	0	-	-	-	-	-	-	-	-	-	-	-	-	-	-	-	-	-	-	-	-	-	-	.	G	C	.	R	R	.	A	C	C	-	-	W	M	C	K	R	-	-	R	R	A	S
G16	-1	0	0	0	-	-	-	-	-	-	-	-	-	-	-	-	-	-	-	-	-	-	-	-	-	-	.	.	.	.	.	C	.	.	-	-	-	-	.	S	.	G	A	-	-	A	.	-	.
G17	-1	0	0	0	-	-	-	-	-	-	-	-	-	-	-	-	-	-	-	-	-	-	-	-	-	-	.	R	.	.	R	M	.	K	-	-	-	-	.	.	W	R	A	-	-	A	.	-	.
Ab19	-1	0	0	0	-	-	-	-	-	-	-	-	-	-	-	-	-	-	-	-	-	-	-	-	-	-	.	.	.	.	.	C	.	.	-	-	-	-	.	C	.	G	A	-	-	A	.	-	.
Ab20	-1	0	0	0	-	-	-	-	-	-	-	-	-	-	-	-	-	-	-	-	-	-	-	-	-	-	.	.	.	.	.	C	.	.	-	-	-	-	W	C	.	G	A	-	-	A	.	-	.
Ab21	-1	0	0	0	-	-	-	-	-	-	-	-	-	-	-	-	-	-	-	-	-	-	-	-	-	-	.	.	.	.	W	C	.	.	G	-	-	-	.	W	.	K	A	T	T	A	K	-	.
B22	-1	0	0	0	-	-	-	-	-	-	-	-	-	-	-	-	-	-	-	-	-	-	-	-	-	-	.	.	.	.	.	C	.	.	-	-	-	-	.	S	.	G	A	A	-	A	.	G	T
B24	-1	0	0	0	-	-	-	-	-	-	-	-	-	-	-	-	-	-	-	-	-	-	-	-	-	-	-	-	-	-	-	-	-	-	-	-	-	-	-	-	-	-	-	-	-	-	-	-	-
B25	-1	0	0	0	-	-	-	-	-	-	-	-	-	-	-	-	-	-	-	-	-	-	-	-	-	-	.	.	.	.	.	C	.	.	-	-	-	-	.	C	.	G	A	-	-	A	.	-	.
B26	-1	0	0	0	-	-	-	-	-	-	-	-	-	-	-	-	-	-	-	-	-	-	-	-	-	-	.	.	.	.	.	C	.	.	-	-	-	-	.	C	.	G	A	-	-	A	.	-	.
B27	-1	0	0	0	-	-	-	-	-	-	-	-	-	-	-	-	-	-	-	-	-	-	-	-	-	-	.	.	.	.	.	C	.	.	-	-	-	-	.	C	.	G	A	-	-	A	.	-	.
B28	-1	0	0	0	-	-	-	-	-	-	-	-	-	-	-	-	-	-	-	-	-	-	-	-	-	-	.	.	.	.	.	C	.	.	-	-	-	-	.	C	.	G	A	-	-	A	.	-	.
B29	-1	0	0	0	-	-	-	-	-	-	-	-	-	-	-	-	-	-	-	-	-	-	-	-	-	-	.	.	.	.	.	C	.	.	-	-	-	-	.	C	.	G	A	-	-	A	.	-	.
B30	-1	0	0	0	-	-	-	-	-	-	-	-	-	-	-	-	-	-	-	-	-	-	-	-	-	-	R	.	.	.	M	C	Y	R	-	-	-	-	.	M	.	G	A	A	-	G	.	T	W
B32	-1	0	0	0	-	-	-	-	-	-	-	-	-	-	-	-	-	-	-	-	-	-	-	-	-	-	.	.	.	.	.	C	.	.	-	-	-	-	.	C	.	G	A	-	-	A	.	-	.
B33	-1	0	0	0	-	-	-	-	-	-	-	-	-	-	-	-	-	-	-	-	-	-	-	-	-	-	-	-	-	.	.	C	.	.	-	-	-	-	.	C	.	G	A	-	-	A	.	-	.
B34	-1	0	0	0	-	-	-	-	-	-	-	-	-	-	-	-	-	-	-	-	-	-	-	-	-	-	.	S	M	.	R	C	Y	.	-	T	-	-	.	C	.	G	A	-	-	A	.	-	.
B35	-1	0	0	0	-	-	-	-	-	-	-	-	-	-	-	-	-	-	-	-	-	-	-	-	-	-	.	-	.	T	K	C	W	.	A	C	-	-	.	C	.	G	A	-	-	A	W	-	R
B36	-1	0	0	0	-	-	-	-	-	-	-	-	-	-	-	-	-	-	-	-	-	-	-	-	-	-	.	.	R	M	.	C	Y	.	-	-	-	-	.	S	.	G	A	-	-	A	.	A	.
B37	-1	0	0	0	-	-	-	-	-	-	-	-	-	-	-	-	-	-	-	-	-	-	-	-	-	-	.	.	.	.	.	C	.	.	-	-	-	-	.	C	.	G	A	-	-	A	.	-	.
B38	-1	0	0	0	-	-	-	-	-	-	-	-	-	-	-	-	-	-	-	-	-	-	-	-	-	-	.	.	.	.	.	C	.	.	-	-	-	-	.	S	.	G	A	-	-	A	.	-	.
B39	-1	0	0	0	-	-	-	-	-	-	-	-	-	-	-	-	-	-	-	-	-	-	-	-	-	-	K	.	.	.	.	C	.	.	-	-	-	-	.	G	.	K	A	-	-	A	.	-	.
B41	-1	0	0	0	-	-	-	-	-	-	-	-	-	-	-	-	-	-	-	-	-	-	-	-	-	-	.	.	.	.	.	C	.	.	-	-	-	-	W	C	.	G	A	-	-	A	.	-	.
B42	-1	0	0	0	T	A	C	C	G	A	T	A	C	A	G	A	A	A	A	T	C	G	T	T	A	A	A	.	C	.	.	C	.	.	-	-	-	-	.	C	.	G	A	-	-	A	.	-	.
B43	-1	0	0	0	-	-	-	-	-	-	-	-	-	-	-	-	-	-	-	-	-	-	-	-	-	-	R	S	.	.	.	C	.	.	-	-	-	-	K	R	.	G	A	-	-	A	.	-	.
B44	-1	0	0	0	-	-	-	-	-	-	-	-	-	-	-	-	-	-	-	-	-	-	-	-	-	-	-	-	-	.	.	C	.	.	-	-	-	-	.	C	.	G	A	-	-	A	.	-	.
D48	-1	0	0	0	-	-	-	-	-	-	-	-	-	-	-	-	-	-	-	-	-	-	-	-	-	-	-	-	-	.	.	C	.	.	-	-	-	-	.	C	.	G	A	-	-	A	.	-	.
D49	-1	0	0	0	-	-	-	-	-	-	-	-	-	-	-	-	-	-	-	-	-	-	-	-	-	-	.	.	.	.	.	C	.	.	-	-	-	-	.	C	.	G	A	-	-	A	.	-	.
D50	-1	0	0	0	-	-	-	-	-	-	-	-	-	-	-	-	-	-	-	-	-	-	-	-	-	-	.	.	.	.	.	C	.	.	-	-	-	-	.	C	.	G	A	-	-	A	.	-	.
D51	-1	0	0	0	-	-	-	-	-	-	-	-	-	-	-	-	-	-	-	-	-	-	-	-	-	-	S	.	.	A	.	C	W	.	-	-	-	-	K	.	.	A	A	-	-	.	.	-	.
D52	-1	0	0	0	-	-	-	-	-	-	-	-	-	-	-	-	-	-	-	-	-	-	-	-	-	-	.	.	.	.	.	C	.	.	-	-	-	-	.	C	.	G	A	-	-	A	.	-	.
D53	-1	0	0	0	-	-	-	-	-	-	-	-	-	-	-	-	-	-	-	-	-	-	-	-	-	-	.	.	.	.	M	C	.	.	-	-	-	-	.	C	.	G	A	-	-	A	.	-	.
D54	-1	0	0	0	-	-	-	-	-	-	-	-	-	-	-	-	-	-	-	-	-	-	-	-	-	-	.	.	.	.	M	C	.	.	-	-	-	-	.	C	.	G	A	-	-	A	.	-	.
D55	-1	0	0	0	-	-	-	-	-	-	-	-	-	-	-	-	-	-	C	T	T	G	A	G	G	G	C	.	G	.	.	A	.	.	A	C	G	C	.	C	G	G	A	C	A	G	.	C	A
D56	-1	0	0	0	-	-	-	-	-	-	-	-	-	-	-	-	-	-	-	-	-	-	-	-	-	-	S	.	.	.	M	C	.	.	-	-	-	-	.	T	Y	G	A	-	-	A	.	-	.
E57	-1	0	0	0	-	-	-	-	-	-	-	-	-	-	-	-	-	-	-	-	-	-	-	-	-	-	.	.	.	.	.	C	.	.	-	-	-	-	.	C	.	G	A	-	-	A	.	-	.
E58	-1	0	0	0	-	-	-	-	-	-	-	-	-	-	-	-	-	-	-	-	-	-	-	-	-	-	.	.	.	.	.	C	.	.	-	-	-	-	.	C	.	G	A	-	-	A	.	-	.
F59	-1	0	0	0	-	-	-	-	-	-	-	-	-	-	-	-	-	-	-	-	-	-	-	-	-	-	.	.	.	.	.	M	.	.	-	-	-	-	.	.	.	G	A	-	-	A	.	-	.
F60	-1	0	0	0	-	-	-	-	-	-	-	-	-	-	-	-	-	-	-	-	-	-	-	-	-	-	.	.	.	.	M	C	.	.	-	-	-	-	.	S	.	G	A	-	-	A	.	-	T
F61	-1	0	0	0	-	-	-	-	-	-	-	-	-	-	-	-	-	-	-	-	-	-	-	-	-	-	.	.	.	.	.	C	.	.	-	-	-	-	.	C	.	G	A	-	-	A	.	-	.
F62	-1	0	0	0	-	-	-	-	-	-	-	-	-	-	-	-	-	-	-	-	-	-	-	-	-	-	A	C	.	T	.	T	.	.	-	-	-	-	-	-	M	G	R	T	-	A	T	C	S
F63	-1	0	0	0	-	-	-	-	-	-	-	-	-	-	-	-	-	-	-	-	-	-	-	-	-	-	.	.	.	.	.	C	.	.	-	-	-	-	.	C	.	G	A	-	-	A	.	-	.
G64	-1	0	0	0	-	-	-	-	-	-	-	-	-	-	-	-	-	-	-	-	-	-	-	-	-	-	.	.	.	.	.	C	.	.	-	-	-	-	.	C	.	G	A	-	-	A	.	-	.
G65	-1	0	0	0	-	-	-	-	-	-	-	-	-	-	-	-	-	-	-	-	-	-	-	-	-	-	.	.	.	.	.	C	.	.	-	-	-	-	.	C	.	G	A	-	-	A	.	-	.
G66	-1	0	0	0	-	-	-	-	-	-	-	-	-	-	-	-	-	-	-	-	-	-	-	-	-	-	.	.	.	.	.	C	.	.	-	-	-	-	.	C	.	G	A	-	-	A	.	-	.
G67	-1	0	0	0	-	-	-	-	-	-	-	-	-	-	-	-	-	-	-	-	-	-	-	-	-	-	.	.	.	.	.	C	.	.	-	-	-	-	.	.	.	G	A	-	-	A	.	-	.
G68	-1	0	0	0	-	-	-	-	-	-	-	-	-	-	-	-	-	-	-	-	-	-	-	-	-	-	.	.	.	.	.	C	.	.	-	-	-	-	.	.	.	G	A	-	-	A	.	-	.
G69	-1	0	0	0	-	-	-	-	-	-	-	-	-	-	-	-	-	-	-	-	-	-	-	-	-	-	-	-	-	.	.	C	.	.	-	-	-	-	.	C	.	G	A	-	-	A	.	-	.
G70	-1	0	0	0	-	-	-	-	-	-	-	-	-	-	-	-	-	-	-	-	-	-	-	-	-	-	.	.	.	.	.	C	.	.	-	-	-	-	.	C	.	G	A	-	-	A	.	-	.
J74	-1	0	0	0	-	-	-	-	-	-	-	-	-	-	-	-	-	-	-	-	-	-	-	-	-	-	.	.	.	.	.	C	.	.	-	-	-	-	.	C	.	G	A	-	-	A	.	-	.
J76	-1	0	0	0	-	-	-	-	-	-	-	-	-	-	-	-	-	-	-	-	-	-	-	-	-	-	.	.	.	.	.	C	.	.	-	-	-	-	.	C	.	G	A	-	-	A	.	-	.
J77	-1	0	0	0	-	-	-	-	-	-	-	-	-	-	-	-	-	-	-	-	-	-	-	-	-	-	.	.	.	.	.	C	.	.	-	-	-	-	.	C	.	G	A	-	-	A	.	-	.
J78	-1	0	0	0	-	-	-	-	-	-	-	-	-	-	-	-	-	-	-	-	-	-	-	-	-	-	.	.	.	.	.	M	.	.	-	-	-	-	.	.	.	G	A	-	-	A	.	-	.
J79	-1	0	0	0	-	-	-	-	-	-	-	-	-	-	-	-	-	-	-	-	-	-	-	-	-	-	.	.	.	.	.	C	.	.	-	-	-	-	.	S	.	G	A	-	-	A	.	-	.
J80	-1	0	0	0	-	-	-	-	-	-	-	-	-	-	-	-	-	-	-	-	-	-	-	-	-	-	.	.	.	.	.	C	.	.	-	-	-	-	.	.	.	G	A	-	-	A	.	-	.
J81	-1	0	0	0	-	-	-	-	-	-	-	-	-	-	-	-	-	-	-	-	-	-	-	-	-	-	.	.	.	.	.	C	K	.	-	-	-	-	W	S	K	G	A	-	-	A	.	-	.
J82	-1	0	0	0	-	-	-	-	-	-	-	-	-	-	-	-	-	-	-	-	-	-	-	-	-	-	-	-	-	.	.	C	.	.	-	-	-	-	.	C	.	G	A	-	-	A	.	-	.
J83	-1	0	0	0	-	-	-	-	-	-	-	-	-	-	-	-	-	-	-	-	-	-	-	-	-	-	-	-	-	.	.	C	.	.	-	-	-	-	.	C	.	G	A	-	-	A	.	-	.
J84	-1	0	0	0	-	-	-	-	-	-	-	-	-	-	-	-	-	-	-	-	-	-	-	-	-	-	-	-	-	.	.	C	.	.	-	-	-	-	.	C	.	G	A	-	-	A	.	-	.
J85	-1	0	0	0	-	-	-	-	-	-	-	-	-	-	-	-	-	-	-	-	-	-	-	-	-	-	.	.	.	.	.	C	.	.	-	-	-	-	.	C	.	G	A	-	-	A	.	-	.
F86	-1	0	0	0	-	-	-	-	-	-	-	-	-	-	-	-	-	-	-	-	-	-	-	-	-	-	-	-	-	.	.	C	.	.	-	-	-	-	.	C	.	G	A	-	-	A	.	-	.
KU855474.1	-1	0	0	0	-	-	-	-	-	-	-	-	-	-	-	-	-	-	-	-	-	-	-	-	-	-	-	G	G	T	G	C	.	T	G	C	-	-	C	G	C	A	G	C	A	G	.	A	.
	4	4	4	4	4	4	4	4	4	4	4	4	4	4	4	4	4	4	4	4	4	4	4	4	4	4	4	4	4	4	4	5	5	5	5	5	5	5	5	5	5	5	5	5	5	5	5	5	5
	6	7	7	7	7	7	7	7	7	7	7	8	8	8	8	8	8	8	8	8	8	9	9	9	9	9	9	9	9	9	9	0	0	0	0	0	0	0	0	0	0	1	1	1	1	1	1	1	1
	9	0	1	2	3	4	5	6	7	8	9	0	1	2	3	4	5	6	7	8	9	0	1	2	3	4	5	6	7	8	9	0	1	2	3	4	5	6	7	8	9	0	1	2	3	4	5	6	7
Ab1	-1	0	0	0	-	-	-	A	W	C	G	-	T	T	A	A	A	A	C	T	-	T	T	C	A	A	C	A	A	C	-	-	-	-	-	-	-	-	-	-	-	-	-	-	-	-	-	-	-
Ab2	-1	0	0	0	-	-	-	.	Y	M	.	-	.	.	.	.	.	.	.	.	-	.	.	.	.	.	.	.	.	.	-	-	-	-	-	-	-	-	-	-	-	-	-	-	-	-	-	-	-
Ab3	-1	0	0	0	-	-	-	.	T	.	.	-	A	A	.	.	.	.	.	.	-	.	.	T	.	.	.	G	.	.	-	-	-	-	-	-	-	-	-	-	-	-	-	-	-	-	-	-	-
Ab4	-1	0	0	0	A	-	A	.	Y	.	.	-	C	.	.	.	.	.	.	.	-	.	.	.	.	.	.	.	.	.	-	-	-	-	-	-	-	-	-	-	-	-	-	-	-	-	-	-	-
Ab6	-1	0	0	0	-	-	-	.	K	T	.	-	-	.	.	.	.	.	.	.	-	.	.	.	G	.	T	C	T	.	-	-	-	-	-	-	-	-	-	-	-	-	-	-	-	-	-	-	-
Ab7	-1	0	0	0	-	-	-	.	.	Y	R	-	W	.	M	.	.	.	.	W	-	.	.	M	.	.	M	R	.	A	-	-	-	-	-	-	-	-	-	-	-	-	-	-	-	-	-	-	-
Ab8	-1	0	0	0	-	-	-	.	T	.	.	-	.	.	.	.	.	.	.	.	-	.	.	.	.	.	.	.	.	.	-	-	-	-	-	-	-	-	-	-	-	-	-	-	-	-	-	-	-
Ab9	-1	0	0	0	-	-	-	.	T	.	.	-	.	.	.	.	.	M	.	.	-	.	.	.	.	M	.	.	.	.	A	A	T	C	G	T	T	A	A	A	M	C	T	T	T	C	A	A	C
Ab10	-1	0	0	0	-	-	-	.	T	.	.	-	.	.	.	.	.	.	.	.	-	.	.	.	.	.	.	.	.	.	-	-	-	-	-	-	-	-	-	-	-	-	-	-	-	-	-	-	-
Ab11	-1	0	0	0	A	T	G	K	G	S	.	T	.	C	.	.	T	G	G	G	-	-	A	.	R	G	G	C	.	T	-	-	-	-	-	-	-	-	-	-	-	-	-	-	-	-	-	-	-
Ab12	-1	0	0	0	-	-	-	.	T	.	.	-	.	.	.	.	.	.	.	.	-	.	.	.	.	.	.	.	.	.	-	-	-	-	-	-	-	-	-	-	-	-	-	-	-	-	-	-	-
Ab13	-1	0	0	0	W	S	G	G	G	G	.	T	.	C	.	.	.	R	R	C	-	-	.	.	R	.	T	G	.	W	-	-	-	-	-	-	-	-	-	-	-	-	-	-	-	-	-	-	-
Ab14	-1	0	0	0	K	-	-	T	T	.	A	A	.	G	M	K	M	M	A	Y	-	-	.	Y	.	R	W	.	.	A	-	-	-	-	-	-	-	-	-	-	-	-	-	-	-	-	-	-	-
G16	-1	0	0	0	-	-	-	.	T	.	.	-	.	.	.	.	.	.	.	.	-	.	.	.	.	.	.	.	.	Y	-	-	-	-	-	-	-	-	-	-	-	-	-	-	-	-	-	-	-
G17	-1	0	0	0	-	-	-	.	T	Y	.	-	.	.	.	.	.	.	M	.	-	.	.	.	.	.	.	R	.	.	-	-	-	-	-	-	-	-	-	-	-	-	-	-	-	-	-	-	-
Ab19	-1	0	0	0	-	-	-	.	T	.	.	-	.	.	.	.	.	.	.	.	-	.	.	.	.	.	.	.	.	.	-	-	-	-	-	-	-	-	-	-	-	-	-	-	-	-	-	-	-
Ab20	-1	0	0	0	-	-	-	.	T	.	.	-	Y	.	.	.	.	.	.	.	-	.	.	.	.	.	.	.	.	.	-	-	-	-	-	-	-	-	-	-	-	-	-	-	-	-	-	-	-
Ab21	-1	0	0	0	-	-	-	.	T	A	A	A	.	Y	.	.	.	.	.	.	-	.	.	.	.	.	.	.	.	.	-	-	-	-	-	-	-	-	-	-	-	-	-	-	-	-	-	-	-
B22	-1	0	0	0	-	-	-	.	T	.	K	-	.	.	.	.	.	.	Y	.	-	.	.	Y	.	.	M	.	.	S	G	-	-	-	-	-	-	-	-	-	-	-	-	-	-	-	-	-	-
B24	-1	0	0	0	-	-	-	-	-	-	A	-	.	.	.	.	.	.	.	.	-	.	.	.	.	.	.	.	.	.	-	-	-	-	-	-	-	-	-	-	-	-	-	-	-	-	-	-	-
B25	-1	0	0	0	-	-	-	.	T	.	.	-	.	.	.	.	.	.	.	.	-	.	.	.	.	.	.	.	.	.	-	-	-	-	-	-	-	-	-	-	-	-	-	-	-	-	-	-	-
B26	-1	0	0	0	-	-	-	.	T	.	.	-	.	.	.	.	.	.	.	.	-	.	.	.	.	.	.	.	.	.	-	-	-	-	-	-	-	-	-	-	-	-	-	-	-	-	-	-	-
B27	-1	0	0	0	-	-	-	.	T	.	.	-	.	.	.	.	.	.	.	.	-	.	.	.	.	.	.	.	.	.	-	-	-	-	-	-	-	-	-	-	-	-	-	-	-	-	-	-	-
B28	-1	0	0	0	-	-	-	.	T	.	.	-	.	.	.	.	.	.	.	.	-	.	.	.	.	.	.	.	.	.	-	-	-	-	-	-	-	-	-	-	-	-	-	-	-	-	-	-	-
B29	-1	0	0	0	-	-	A	.	T	T	.	-	.	.	.	.	.	.	.	.	-	.	.	.	.	.	.	.	.	.	-	-	-	-	-	-	-	-	-	-	-	-	-	-	-	-	-	-	-
B30	-1	0	0	0	-	-	-	.	T	Y	K	-	K	.	.	.	.	.	S	.	-	.	.	.	.	.	M	.	.	M	R	-	-	-	-	-	-	-	-	-	-	-	-	-	-	-	-	-	-
B32	-1	0	0	0	-	-	-	.	T	.	.	-	.	.	.	.	.	.	.	.	-	.	.	.	.	.	.	.	.	.	-	-	-	-	-	-	-	-	-	-	-	-	-	-	-	-	-	-	-
B33	-1	0	0	0	-	-	-	.	T	.	.	-	.	.	.	.	.	.	.	.	-	.	.	.	.	.	.	.	.	.	-	-	-	-	-	-	-	-	-	-	-	-	-	-	-	-	-	-	-
B34	-1	0	0	0	-	-	-	.	T	M	R	-	.	.	.	.	.	W	Y	.	-	.	.	.	.	T	.	R	M	.	-	-	-	-	-	-	-	-	-	-	-	-	-	-	-	-	-	-	-
B35	-1	0	0	0	-	-	-	.	T	.	R	-	Y	.	.	.	.	.	Y	.	-	.	.	.	.	.	Y	W	.	S	-	-	-	-	-	-	-	-	-	-	-	-	-	-	-	-	-	-	-
B36	-1	0	0	0	-	-	-	.	T	M	.	-	.	.	.	.	.	.	Y	.	-	.	.	.	.	.	.	.	W	S	-	-	-	-	-	-	-	-	-	-	-	-	-	-	-	-	-	-	-
B37	-1	0	0	0	-	-	-	.	T	.	.	-	.	.	.	.	.	.	.	.	-	.	.	.	.	.	.	.	.	.	-	-	-	-	-	-	-	-	-	-	-	-	-	-	-	-	-	-	-
B38	-1	0	0	0	-	-	-	.	T	M	.	-	.	.	.	.	.	.	.	.	-	.	.	.	.	.	.	.	M	.	-	-	-	-	-	-	-	-	-	-	-	-	-	-	-	-	-	-	-
B39	-1	0	0	0	A	-	A	.	.	A	R	-	.	.	.	.	.	.	.	.	-	.	K	M	.	.	Y	W	.	.	-	-	-	-	-	-	-	-	-	-	-	-	-	-	-	-	-	-	-
B41	-1	0	0	0	-	-	-	.	T	Y	.	-	.	.	.	.	.	.	.	.	-	.	.	.	.	.	.	.	W	Y	-	-	-	-	-	-	-	-	-	-	-	-	-	-	-	-	-	-	-
B42	-1	0	0	0	-	-	-	.	T	.	.	-	.	.	.	.	.	.	.	.	-	.	.	.	.	.	.	.	.	.	-	-	-	-	-	-	-	-	-	-	-	-	-	-	-	-	-	-	-
B43	-1	0	0	0	-	-	A	.	T	T	R	-	.	.	.	.	.	.	.	.	-	.	.	.	R	.	.	.	.	S	-	-	-	-	-	-	-	-	-	-	-	-	-	-	-	-	-	-	-
B44	-1	0	0	0	-	-	-	.	T	.	.	-	.	.	.	.	.	.	.	.	-	.	.	.	.	.	.	.	.	.	-	-	-	-	-	-	-	-	-	-	-	-	-	-	-	-	-	-	-
D48	-1	0	0	0	-	-	-	.	T	.	.	-	.	.	.	.	.	.	.	.	-	.	.	.	.	.	.	.	.	.	-	-	-	-	-	-	-	-	-	-	-	-	-	-	-	-	-	-	-
D49	-1	0	0	0	-	-	A	.	T	T	.	-	.	.	.	.	.	.	.	.	-	.	.	.	.	.	.	.	.	.	-	-	-	-	-	-	-	-	-	-	-	-	-	-	-	-	-	-	-
D50	-1	0	0	0	-	-	A	.	T	T	.	-	.	.	.	.	.	.	.	.	-	.	.	.	.	.	.	.	.	.	-	-	-	-	-	-	-	-	-	-	-	-	-	-	-	-	-	-	-
D51	-1	0	0	0	A	-	A	.	Y	M	K	-	R	.	.	.	.	.	.	.	-	.	.	.	.	.	A	.	.	M	-	-	-	-	-	-	-	-	-	-	-	-	-	-	-	-	-	-	-
D52	-1	0	0	0	-	-	A	.	T	T	.	-	.	.	.	.	.	.	.	.	-	.	.	.	.	.	.	.	.	.	-	-	-	-	-	-	-	-	-	-	-	-	-	-	-	-	-	-	-
D53	-1	0	0	0	-	-	-	.	T	.	.	-	.	.	.	.	.	.	.	.	-	.	.	.	.	.	.	.	.	.	-	-	-	-	-	-	-	-	-	-	-	-	-	-	-	-	-	-	-
D54	-1	0	0	0	-	-	-	.	T	.	.	-	.	.	.	.	.	.	.	.	-	.	.	.	.	.	.	.	.	.	-	-	-	-	-	-	-	-	-	-	-	-	-	-	-	-	-	-	-
D55	-1	0	0	0	A	T	G	T	G	.	.	T	.	C	.	.	.	G	A	C	-	-	.	.	G	.	T	G	.	T	-	-	-	-	-	-	-	-	-	-	-	-	-	-	-	-	-	-	-
D56	-1	0	0	0	A	-	A	.	T	.	.	-	W	A	W	.	.	.	Y	.	-	.	.	.	.	.	Y	.	W	S	-	-	-	-	-	-	-	-	-	-	-	-	-	-	-	-	-	-	-
E57	-1	0	0	0	-	-	A	.	T	T	.	-	.	.	.	.	.	.	.	.	-	.	.	.	.	.	.	.	.	.	-	-	-	-	-	-	-	-	-	-	-	-	-	-	-	-	-	-	-
E58	-1	0	0	0	-	-	A	.	T	T	.	-	.	.	.	.	.	.	.	.	-	.	.	.	.	.	.	.	.	.	-	-	-	-	-	-	-	-	-	-	-	-	-	-	-	-	-	-	-
F59	-1	0	0	0	C	C	R	.	C	A	C	-	.	G	.	.	C	.	M	.	G	.	Y	T	G	.	A	G	G	T	-	-	-	-	-	-	-	-	-	-	-	-	-	-	-	-	-	-	-
F60	-1	0	0	0	C	-	A	.	T	A	A	-	.	.	.	.	.	.	.	.	-	.	.	.	.	W	.	.	W	.	-	-	-	-	-	-	-	-	-	-	-	-	-	-	-	-	-	-	-
F61	-1	0	0	0	A	-	A	.	T	.	.	-	.	C	.	.	.	.	.	.	-	.	.	.	.	.	.	.	.	.	-	-	-	-	-	-	-	-	-	-	-	-	-	-	-	-	-	-	-
F62	-1	0	0	0	C	-	W	.	T	T	T	Y	Y	G	.	T	G	.	G	.	-	-	.	T	G	G	T	.	R	M	-	-	-	-	-	-	-	-	-	-	-	-	-	-	-	-	-	-	-
F63	-1	0	0	0	-	-	A	.	T	T	.	-	.	.	.	.	.	.	.	.	-	.	.	.	.	.	.	.	.	.	-	-	-	-	-	-	-	-	-	-	-	-	-	-	-	-	-	-	-
G64	-1	0	0	0	-	-	A	.	T	T	.	-	.	.	.	.	.	.	.	.	-	.	.	.	.	.	.	.	.	.	-	-	-	-	-	-	-	-	-	-	-	-	-	-	-	-	-	-	-
G65	-1	0	0	0	-	-	-	.	T	.	.	-	.	.	.	.	.	.	.	.	-	.	.	.	.	.	.	.	.	.	-	-	-	-	-	-	-	-	-	-	-	-	-	-	-	-	-	-	-
G66	-1	0	0	0	-	-	-	.	T	.	.	-	.	.	.	.	.	.	.	.	-	.	.	.	.	.	.	.	.	.	-	-	-	-	-	-	-	-	-	-	-	-	-	-	-	-	-	-	-
G67	-1	0	0	0	A	-	A	.	T	M	.	-	.	.	.	.	.	.	.	.	-	.	.	.	.	W	.	.	.	.	-	-	-	-	-	-	-	-	-	-	-	-	-	-	-	-	-	-	-
G68	-1	0	0	0	-	-	A	.	T	T	.	-	.	.	.	.	.	.	.	.	-	.	.	.	.	.	.	.	.	.	-	-	-	-	-	-	-	-	-	-	-	-	-	-	-	-	-	-	-
G69	-1	0	0	0	-	-	-	.	T	.	.	-	.	.	.	.	.	.	.	.	-	.	.	.	.	.	.	.	.	.	-	-	-	-	-	-	-	-	-	-	-	-	-	-	-	-	-	-	-
G70	-1	0	0	0	-	-	A	.	T	T	.	-	.	.	.	.	.	.	.	.	-	.	.	.	.	.	.	.	.	.	-	-	-	-	-	-	-	-	-	-	-	-	-	-	-	-	-	-	-
J74	-1	0	0	0	A	-	A	.	T	.	.	-	.	.	.	.	.	.	.	.	-	.	.	.	.	.	.	.	.	.	-	-	-	-	-	-	-	-	-	-	-	-	-	-	-	-	-	-	-
J76	-1	0	0	0	-	-	A	.	T	T	.	-	.	.	.	.	.	.	.	.	-	.	.	.	.	.	.	.	.	.	-	-	-	-	-	-	-	-	-	-	-	-	-	-	-	-	-	-	-
J77	-1	0	0	0	-	-	A	.	T	T	.	-	.	.	.	.	.	.	.	.	-	.	.	.	.	.	.	.	.	.	-	-	-	-	-	-	-	-	-	-	-	-	-	-	-	-	-	-	-
J78	-1	0	0	0	-	-	-	.	T	M	.	-	.	.	.	.	.	.	.	.	-	.	.	M	.	.	.	.	.	S	-	-	-	-	-	-	-	-	-	-	-	-	-	-	-	-	-	-	-
J79	-1	0	0	0	-	-	-	.	T	.	.	-	.	.	.	.	.	.	.	.	-	.	.	.	.	.	.	.	.	.	-	-	-	-	-	-	-	-	-	-	-	-	-	-	-	-	-	-	-
J80	-1	0	0	0	A	-	A	.	T	.	.	-	.	.	.	.	.	.	.	.	-	.	.	.	.	.	.	.	.	.	-	-	-	-	-	-	-	-	-	-	-	-	-	-	-	-	-	-	-
J81	-1	0	0	0	-	-	-	.	.	M	.	-	.	.	.	.	.	.	.	.	-	.	.	.	.	R	S	.	W	.	-	-	-	-	-	-	-	-	-	-	-	-	-	-	-	-	-	-	-
J82	-1	0	0	0	-	-	-	.	T	.	.	-	.	.	.	.	.	.	.	.	-	.	.	.	.	.	.	.	.	.	-	-	-	-	-	-	-	-	-	-	-	-	-	-	-	-	-	-	-
J83	-1	0	0	0	-	-	-	.	T	.	.	-	.	.	.	.	.	.	.	.	-	.	.	.	.	.	.	.	.	.	-	-	-	-	-	-	-	-	-	-	-	-	-	-	-	-	-	-	-
J84	-1	0	0	0	-	-	-	.	T	.	.	-	.	.	.	.	.	.	.	.	-	.	.	.	.	.	.	.	.	.	-	-	-	-	-	-	-	-	-	-	-	-	-	-	-	-	-	-	-
J85	-1	0	0	0	-	-	-	.	T	.	.	-	.	.	M	.	.	.	.	.	-	.	.	.	.	.	.	.	.	.	-	-	-	-	-	-	-	-	-	-	-	-	-	-	-	-	-	-	-
F86	-1	0	0	0	-	-	-	.	T	.	.	-	.	.	.	.	.	.	.	.	-	.	.	.	.	.	.	.	.	.	-	-	-	-	-	-	-	-	-	-	-	-	-	-	-	-	-	-	-
KU855474.1	-1	0	0	0	-	-	-	-	-	.	.	-	-	-	-	-	-	.	.	.	-	C	.	.	G	G	.	.	.	.	-	-	-	-	-	-	-	-	-	-	-	-	-	-	-	-	-	-	-
	5	5	5	5	5	5	5	5	5	5	5	5	5	5	5	5	5	5	5	5	5	5	5	5	5	5	5	5	5	5	5	5	5	5	5	5	5	5	5	5	5	5	5	5	5	5	5	5	5
	4	4	4	5	5	5	5	5	5	5	5	5	5	6	6	6	6	6	6	6	6	6	6	7	7	7	7	7	7	7	7	7	7	8	8	8	8	8	8	8	8	8	8	9	9	9	9	9	9
	7	8	9	0	1	2	3	4	5	6	7	8	9	0	1	2	3	4	5	6	7	8	9	0	1	2	3	4	5	6	7	8	9	0	1	2	3	4	5	6	7	8	9	0	1	2	3	4	5
Ab1	-1	0	0	0	-	-	A	G	A	A	C	G	C	A	G	C	-	-	-	-	A	C	T	T	C	G	G	A	A	C	G	G	A	T	T	T	C	-	-	-	-	-	-	C	G	G	T	C	T
Ab2	-1	0	0	0	-	-	.	R	.	.	.	.	.	.	K	.	-	-	G	A	.	A	.	G	.	.	A	T	.	.	.	T	.	A	.	G	T	-	-	-	-	-	-	G	A	A	.	-	.
Ab3	-1	0	0	0	-	-	.	C	.	.	.	.	.	.	A	.	-	-	-	-	.	.	.	-	.	.	.	.	.	.	.	.	.	.	A	.	.	-	-	-	-	-	-	T	C	.	G	T	C
Ab4	-1	0	0	0	-	-	.	A	.	.	.	.	.	.	A	A	-	-	C	A	R	A	-	-	-	-	-	-	-	-	-	-	-	-	-	-	-	-	-	-	-	-	-	-	-	-	-	-	-
Ab6	-1	0	0	0	-	-	.	.	.	.	.	.	.	.	.	.	-	-	-	-	.	A	.	G	A	A	.	.	.	.	.	C	.	G	C	A	-	-	-	-	-	-	-	-	-	-	-	-	-
Ab7	-1	0	0	0	-	-	.	.	.	.	Y	S	.	W	R	A	-	-	G	A	.	A	A	K	S	.	A	T	W	A	S	T	.	A	.	G	T	-	-	-	-	-	-	K	A	A	W	-	.
Ab8	-1	0	0	0	-	-	.	.	.	.	.	.	.	.	.	.	-	-	G	A	.	A	.	G	.	.	A	T	M	S	.	T	.	A	.	K	T	-	-	-	-	-	-	G	A	A	.	-	.
Ab9	-1	0	0	0	-	-	.	.	.	.	.	.	.	.	S	.	-	-	G	A	.	A	.	G	.	.	A	T	.	.	.	T	.	A	.	G	T	-	-	-	-	-	-	G	A	A	.	-	.
Ab10	-1	0	0	0	-	-	.	.	.	.	.	.	.	.	.	.	-	-	G	A	.	A	.	G	.	.	A	T	.	.	.	T	.	A	.	G	T	-	-	-	-	-	-	G	A	A	.	-	.
Ab11	-1	0	0	0	-	C	.	T	W	T	.	-	.	.	T	T	T	C	T	C	T	G	C	G	T	T	Y	T	T	.	A	T	C	G	A	.	K	C	C	G	-	-	-	G	A	A	C	.	A
Ab12	-1	0	0	0	-	-	.	.	.	.	.	.	.	.	.	.	-	-	G	A	.	A	.	G	.	.	A	T	.	.	.	T	.	A	.	G	T	-	-	-	-	-	-	G	A	A	.	-	.
Ab13	-1	0	0	0	-	C	W	W	W	T	.	S	.	W	T	T	T	C	S	T	T	K	C	G	T	T	T	T	T	.	W	T	C	R	A	K	K	Y	C	K	-	-	-	W	A	A	Y	.	A
Ab14	-1	0	0	0	-	-	.	.	.	.	T	K	.	.	S	T	-	-	G	A	.	A	G	S	A	.	A	T	T	T	.	T	.	M	.	G	T	T	C	R	A	T	C	G	A	T	C	T	.
G16	-1	0	0	0	-	-	.	.	.	.	.	.	.	.	.	.	-	-	G	A	.	A	.	G	.	.	A	T	.	Y	.	T	.	A	.	G	T	-	-	-	-	-	-	G	A	A	.	-	.
G17	-1	0	0	0	-	-	.	R	-	-	-	-	-	-	-	-	-	-	-	-	-	-	-	-	-	-	-	-	-	-	-	-	-	-	-	-	-	-	-	-	-	-	-	-	-	-	-	-	-
Ab19	-1	0	0	0	-	-	.	.	.	.	.	.	.	.	.	.	-	-	G	A	.	A	.	G	.	.	A	T	.	.	.	T	.	A	.	G	T	-	-	-	-	-	-	G	A	A	.	-	.
Ab20	-1	0	0	0	-	-	.	.	.	.	.	K	.	.	.	.	-	-	G	A	.	A	.	G	.	.	A	T	.	.	.	T	.	A	.	G	T	-	-	-	-	-	-	G	A	A	.	-	.
Ab21	-1	0	0	0	-	-	.	.	.	.	.	.	.	.	K	Y	-	-	G	A	.	A	.	G	.	.	A	T	.	M	.	Y	.	A	K	G	T	-	-	-	-	-	-	G	A	A	.	-	.
B22	-1	0	0	0	-	-	.	R	.	.	.	R	.	.	.	M	-	-	R	A	.	A	.	G	.	.	A	T	.	Y	.	T	.	A	W	R	T	-	-	-	-	-	-	G	A	A	W	-	.
B24	-1	0	0	0	-	-	.	.	.	.	.	.	.	.	.	.	-	-	G	A	.	A	.	G	.	.	A	T	.	.	.	T	.	A	.	G	T	-	-	-	-	-	-	G	A	A	.	-	.
B25	-1	0	0	0	-	-	.	.	.	.	.	.	.	.	.	.	-	-	G	A	.	A	.	G	.	.	A	T	.	.	.	T	.	A	.	G	T	-	-	-	-	-	-	G	A	A	.	-	.
B26	-1	0	0	0	-	-	.	.	.	.	.	.	.	.	.	.	-	-	G	A	.	A	.	G	.	.	A	T	.	.	.	T	.	A	.	G	T	-	-	-	-	-	-	G	A	A	.	-	.
B27	-1	0	0	0	-	-	.	.	.	.	.	.	.	.	.	.	-	-	G	A	.	A	.	G	.	.	A	T	.	.	.	T	.	A	.	G	T	-	-	-	-	-	-	G	A	A	.	-	.
B28	-1	0	0	0	-	-	.	.	.	.	.	.	.	.	R	.	-	-	G	A	.	A	.	G	.	.	A	T	.	.	.	T	.	A	.	G	T	-	-	-	-	-	-	G	A	A	.	-	.
B29	-1	0	0	0	-	-	.	.	.	.	.	.	.	.	.	.	-	-	G	A	.	A	.	G	.	.	A	T	.	.	.	T	.	A	.	G	T	-	-	-	-	-	-	G	A	A	.	-	.
B30	-1	0	0	0	-	-	.	R	.	.	M	.	.	.	C	A	C	A	G	A	.	A	K	G	M	.	A	T	.	Y	.	T	.	A	W	G	T	-	-	-	-	-	-	G	A	A	A	-	.
B32	-1	0	0	0	-	-	.	.	.	.	.	.	.	.	.	.	-	-	G	A	.	A	.	G	.	.	A	T	.	.	.	T	.	A	.	G	T	-	-	-	-	-	-	G	A	A	.	-	.
B33	-1	0	0	0	-	-	.	.	.	.	.	.	.	.	.	.	-	-	G	A	.	A	.	G	.	.	A	T	.	.	.	T	.	A	.	G	T	-	-	-	-	-	-	G	A	A	.	-	.
B34	-1	0	0	0	A	C	.	.	.	R	.	.	M	.	A	Y	-	-	G	A	.	A	.	G	.	.	A	.	.	Y	.	T	.	A	A	K	T	-	-	-	-	-	-	G	M	A	.	-	.
B35	-1	0	0	0	-	-	.	K	W	W	.	.	.	.	K	W	-	-	G	A	.	A	.	G	M	.	A	W	.	.	.	W	.	A	.	G	T	-	-	-	-	-	-	G	A	A	.	A	.
B36	-1	0	0	0	-	-	.	R	.	.	.	K	Y	.	.	A	-	-	R	A	.	A	.	G	.	.	A	T	.	M	R	Y	.	A	.	G	K	-	-	-	-	-	-	G	A	A	.	-	.
B37	-1	0	0	0	-	-	.	.	.	.	.	.	.	.	.	.	-	-	G	A	.	A	.	G	.	.	A	T	.	.	.	T	.	A	.	G	T	-	-	-	-	-	-	G	A	A	.	-	.
B38	-1	0	0	0	-	-	.	K	.	.	.	.	.	.	.	M	-	-	G	A	.	A	.	G	.	R	W	T	.	.	.	T	.	A	.	G	T	-	-	-	-	-	-	G	A	A	.	-	.
B39	-1	0	0	0	-	-	.	R	.	.	.	.	S	.	K	.	-	-	K	M	W	W	K	G	.	K	A	T	.	R	.	W	.	A	.	G	T	-	-	-	-	-	-	G	A	A	.	-	W
B41	-1	0	0	0	-	-	.	R	.	.	.	.	.	.	W	.	-	-	G	A	.	A	Y	R	S	.	A	T	.	M	K	T	.	A	W	G	T	-	-	-	-	-	-	G	A	A	.	-	.
B42	-1	0	0	0	-	-	.	.	.	.	.	.	.	.	.	.	-	-	G	A	.	A	.	G	.	.	A	T	.	.	.	T	.	A	.	G	T	-	-	-	-	-	-	G	A	A	.	-	.
B43	-1	0	0	0	-	-	.	.	.	.	M	R	M	W	.	.	-	-	G	A	.	A	.	G	.	R	A	T	R	M	.	W	.	W	.	G	T	-	-	-	-	-	-	G	A	A	.	-	W
B44	-1	0	0	0	-	-	.	.	.	.	.	.	.	.	.	.	-	-	G	A	.	A	.	G	.	.	A	T	.	.	.	T	.	A	.	G	T	-	-	-	-	-	-	G	A	A	.	-	.
D48	-1	0	0	0	-	-	.	.	.	.	.	.	.	.	.	.	-	-	G	A	.	A	.	G	.	.	A	T	.	.	.	T	.	A	.	G	T	-	-	-	-	-	-	G	A	A	.	-	.
D49	-1	0	0	0	-	-	.	.	.	.	.	.	.	.	.	M	-	-	G	A	.	A	.	G	.	.	A	T	.	.	.	T	.	A	.	G	T	-	-	-	-	-	-	G	A	A	.	-	.
D50	-1	0	0	0	-	-	.	.	.	.	.	.	.	.	.	.	-	-	G	A	.	A	.	G	.	.	A	T	.	.	.	T	.	A	.	G	T	-	-	-	-	-	-	G	A	A	.	-	.
D51	-1	0	0	0	-	-	.	.	.	.	M	S	.	W	.	M	-	-	R	A	W	A	.	S	.	M	A	T	R	A	A	W	.	W	.	G	K	-	-	-	-	-	-	R	A	A	.	-	.
D52	-1	0	0	0	-	-	.	.	.	.	.	.	.	.	.	.	-	-	G	A	.	A	.	G	.	.	A	T	.	.	.	T	.	A	.	G	T	-	-	-	-	-	-	G	A	A	.	-	.
D53	-1	0	0	0	-	-	.	.	.	.	.	.	Y	W	K	.	-	-	G	A	.	A	.	G	.	.	A	T	.	.	.	T	.	A	W	G	T	-	-	-	-	-	-	G	A	A	.	-	.
D54	-1	0	0	0	-	-	.	.	.	.	.	.	Y	W	K	.	-	-	G	A	.	A	.	G	.	.	A	T	.	.	.	T	.	A	W	G	T	-	-	-	-	-	-	G	A	A	.	-	.
D55	-1	0	0	0	-	C	G	T	.	T	.	.	.	.	T	T	T	C	G	M	W	R	C	G	T	T	C	T	T	.	A	T	C	G	A	.	G	C	C	G	-	-	-	G	A	A	C	.	A
D56	-1	0	0	0	-	-	.	.	.	.	.	K	.	.	R	Y	-	-	R	A	.	A	.	G	S	R	A	T	.	S	.	W	.	A	.	G	T	-	-	-	-	-	-	G	A	A	.	-	K
E57	-1	0	0	0	-	-	.	.	.	.	.	.	.	.	.	.	-	-	G	A	.	A	.	G	.	.	A	T	.	.	.	T	.	A	.	G	T	-	-	-	-	-	-	G	A	A	.	-	.
E58	-1	0	0	0	-	-	.	.	.	.	.	.	.	.	.	.	-	-	G	A	.	A	.	G	.	.	A	T	.	.	.	T	.	A	.	G	T	-	-	-	-	-	-	G	A	A	.	-	.
F59	-1	0	0	0	-	-	.	R	.	.	.	R	Y	R	K	S	-	-	G	A	.	A	.	G	.	.	A	W	.	.	.	T	.	A	.	G	T	-	-	-	-	-	-	G	A	A	.	-	.
F60	-1	0	0	0	-	-	.	.	.	.	.	.	.	.	.	.	-	-	G	A	.	A	.	G	.	.	A	T	.	A	T	T	.	A	.	G	T	-	-	-	-	-	-	G	A	A	.	-	.
F61	-1	0	0	0	-	-	.	.	.	.	.	.	.	.	.	.	-	-	G	A	.	A	.	G	.	.	A	T	.	.	.	T	.	A	.	G	T	-	-	-	-	-	-	G	A	A	.	-	.
F62	-1	0	0	0	A	T	T	.	K	T	T	.	.	.	.	T	A	G	G	R	G	A	.	.	-	-	A	Y	T	T	.	K	.	C	C	.	T	-	-	-	-	-	-	T	C	A	.	Y	.
F63	-1	0	0	0	-	-	.	.	.	.	.	.	.	.	.	.	-	-	G	A	.	A	.	G	.	.	A	T	.	.	.	T	.	A	.	G	T	-	-	-	-	-	-	G	A	A	.	-	.
G64	-1	0	0	0	-	-	.	.	.	.	.	.	.	.	.	.	-	-	G	A	.	A	.	G	.	.	A	T	.	.	.	T	.	A	.	G	T	-	-	-	-	-	-	G	A	A	.	-	.
G65	-1	0	0	0	-	-	.	.	.	.	.	.	.	.	.	.	-	-	G	A	.	A	.	G	.	.	A	T	.	.	.	T	.	A	.	G	T	-	-	-	-	-	-	G	A	A	.	-	.
G66	-1	0	0	0	-	-	.	.	.	.	.	.	.	.	.	.	-	-	G	A	.	A	.	G	.	.	A	T	.	.	.	T	.	A	.	G	T	-	-	-	-	-	-	G	A	A	.	-	.
G67	-1	0	0	0	-	-	.	A	.	.	.	R	.	.	S	M	-	-	G	A	.	A	.	G	.	.	A	T	.	.	.	W	.	A	.	G	K	-	-	-	-	-	-	G	A	A	.	-	.
G68	-1	0	0	0	-	-	.	.	.	.	.	.	.	.	.	.	-	-	G	A	.	A	.	G	.	.	A	T	.	.	.	T	.	A	.	G	T	-	-	-	-	-	-	G	A	A	.	-	.
G69	-1	0	0	0	-	-	.	.	.	.	.	.	.	.	.	.	-	-	G	A	.	A	.	G	.	.	A	T	.	.	.	T	.	A	.	G	T	-	-	-	-	-	-	G	A	A	.	-	.
G70	-1	0	0	0	-	-	.	.	.	.	.	S	.	.	.	.	-	-	G	A	.	A	.	G	.	.	A	T	.	.	.	W	.	W	.	G	T	-	-	-	-	-	-	G	A	A	.	-	.
J74	-1	0	0	0	-	-	.	.	.	.	.	R	.	.	.	.	-	-	G	A	.	A	.	G	.	.	A	T	.	.	.	T	.	A	.	G	T	-	-	-	-	-	-	G	A	A	.	-	.
J76	-1	0	0	0	-	-	.	.	.	.	.	.	.	.	.	.	-	-	G	A	.	A	.	G	.	.	A	T	.	.	.	T	.	A	.	G	T	-	-	-	-	-	-	G	A	A	.	-	.
J77	-1	0	0	0	-	-	.	.	.	.	.	.	.	.	.	.	-	-	G	A	.	A	.	G	.	.	A	T	.	.	.	T	.	A	.	G	T	-	-	-	-	-	-	G	A	A	.	-	.
J78	-1	0	0	0	-	-	.	K	.	.	.	.	.	.	.	K	-	-	A	A	.	A	.	K	.	S	A	T	.	.	.	T	.	A	.	G	T	-	-	-	-	-	-	G	A	A	.	-	.
J79	-1	0	0	0	-	-	.	S	.	.	.	.	.	.	.	.	-	-	G	A	.	A	.	G	.	.	A	T	.	.	.	T	.	A	.	G	T	-	-	-	-	-	-	G	A	A	.	-	.
J80	-1	0	0	0	-	-	.	.	.	.	.	.	.	.	.	.	-	-	G	A	.	A	.	G	.	.	A	T	.	.	.	T	.	A	.	G	T	-	-	-	-	-	-	G	A	A	.	-	.
J81	-1	0	0	0	-	-	.	.	.	.	.	.	.	.	.	.	-	-	G	A	.	A	.	G	.	.	A	T	.	.	.	T	.	A	W	G	T	-	-	-	-	-	-	G	M	A	.	-	W
J82	-1	0	0	0	-	-	.	.	.	.	.	.	.	.	.	.	-	-	G	A	.	A	.	G	.	.	A	T	.	.	.	T	.	A	.	G	T	-	-	-	-	-	-	G	A	A	.	-	.
J83	-1	0	0	0	-	-	.	.	.	.	.	.	.	.	.	.	-	-	G	A	.	A	.	G	.	.	A	T	.	.	.	T	.	A	.	G	T	-	-	-	-	-	-	G	A	A	.	-	.
J84	-1	0	0	0	-	-	.	.	.	.	.	.	.	.	.	.	-	-	G	A	.	A	.	G	.	.	A	T	.	.	.	T	.	A	.	G	T	-	-	-	-	-	-	G	A	A	.	-	.
J85	-1	0	0	0	-	-	.	.	.	.	.	.	.	.	.	.	-	-	G	A	.	A	.	G	.	.	A	T	.	.	.	T	.	A	.	G	T	-	-	-	-	-	-	G	A	A	.	-	.
F86	-1	0	0	0	-	-	.	.	.	.	.	.	.	.	.	.	-	-	G	A	.	A	.	G	.	.	A	T	.	.	.	T	.	A	.	G	T	-	-	-	-	-	-	G	A	A	.	-	.
KU855474.1	-1	0	0	0	-	-	.	.	.	.	.	.	T	.	.	.	-	-	G	A	.	A	.	G	.	.	A	T	.	.	T	T	G	G	.	G	T	-	-	-	-	-	-	G	A	A	.	-	.
	6	6	6	6	6	6	6	6	6	6	6	6	6	6	6	6	6	6	6	6	6	6	6	6	6	6	6	6	6	6	6	6	6	6	6	6	6	6	6	6	6	6	6	6	6	6	6	6	6
	2	2	2	2	2	3	3	3	3	3	3	3	3	3	3	4	4	4	4	4	4	4	4	4	4	5	5	5	5	5	5	5	5	5	5	6	6	6	6	6	6	6	6	6	6	7	7	7	7
	5	6	7	8	9	0	1	2	3	4	5	6	7	8	9	0	1	2	3	4	5	6	7	8	9	0	1	2	3	4	5	6	7	8	9	0	1	2	3	4	5	6	7	8	9	0	1	2	3
Ab1	-1	0	0	0	-	-	-	-	-	-	W	K	A	A	A	A	A	M	S	-	C	M	A	C	A	A	A	-	-	-	-	-	-	-	-	-	-	-	-	-	-	-	-	-	-	-	-	-	-
Ab2	-1	0	0	0	-	-	-	-	-	-	-	T	G	.	.	C	G	C	A	-	.	A	T	T	G	C	G	C	C	C	C	C	-	-	-	-	-	T	G	G	T	A	T	T	C	C	G	G	G
Ab3	-1	0	0	0	-	-	-	-	-	-	A	T	G	.	.	.	.	C	G	-	.	A	T	A	.	-	-	-	-	-	-	-	-	-	-	-	-	-	-	-	-	-	-	-	-	-	-	-	-
Ab4	-1	0	0	0	-	-	-	-	-	-	-	-	-	-	-	-	-	-	-	-	-	-	-	-	-	-	-	-	-	-	-	-	-	-	-	-	-	-	-	-	-	-	-	-	-	-	-	-	-
Ab6	-1	0	0	0	-	-	-	-	-	-	-	-	-	-	-	-	-	-	-	-	-	-	-	-	-	-	-	-	-	-	-	-	-	-	-	-	-	-	-	-	-	-	-	-	-	-	-	-	-
Ab7	-1	0	0	0	-	-	-	-	-	-	T	T	T	.	.	M	C	C	C	R	R	G	T	T	G	C	C	C	C	C	S	Y	-	-	-	-	-	C	G	G	T	A	T	T	Y	S	G	G	G
Ab8	-1	0	0	0	-	-	-	-	-	-	-	T	G	.	.	C	G	C	A	-	.	A	T	T	G	C	G	C	C	C	C	C	-	-	-	-	-	T	G	G	T	A	T	T	C	S	G	G	G
Ab9	-1	0	0	0	-	-	-	-	-	-	-	T	G	.	.	C	G	C	A	-	.	A	T	T	G	C	G	C	C	C	C	C	-	-	-	-	-	T	G	G	T	A	T	T	C	C	G	G	G
Ab10	-1	0	0	0	-	-	-	-	-	-	-	T	G	.	.	C	G	C	A	-	.	A	T	T	G	C	G	C	C	C	C	C	-	-	-	-	-	T	G	G	T	A	T	T	C	C	G	G	G
Ab11	-1	0	0	0	T	G	-	T	A	T	C	G	G	T	.	M	T	C	A	-	G	.	C	T	G	C	.	A	C	C	T	T	-	C	A	G	A	C	A	G	T	G	T	T	C	M	T	G	G
Ab12	-1	0	0	0	-	-	-	-	-	-	-	T	G	.	.	C	G	C	A	-	.	A	T	T	G	C	G	C	C	C	C	C	-	-	-	-	-	T	G	G	T	A	T	T	C	C	G	G	G
Ab13	-1	0	0	0	T	W	-	T	A	T	Y	G	R	W	W	Y	T	C	M	-	W	A	M	T	G	S	R	A	C	C	T	T	T	C	A	G	A	M	A	G	S	G	K	Y	C	R	T	G	G
Ab14	-1	0	0	0	C	A	G	W	C	T	K	.	W	.	W	C	R	C	G	-	.	A	T	T	G	C	G	C	A	C	T	Y	Y	-	-	-	-	T	G	G	Y	A	T	T	M	C	G	S	G
G16	-1	0	0	0	-	-	-	-	-	-	-	T	G	.	W	C	G	C	A	-	.	A	T	T	G	C	G	C	C	C	C	M	-	-	-	-	-	T	G	G	T	A	T	T	C	C	G	G	G
G17	-1	0	0	0	-	-	-	-	-	-	-	T	G	.	.	M	S	Y	C	-	.	A	T	T	G	C	Y	C	C	C	C	C	-	-	-	-	-	T	G	G	T	A	T	T	C	C	G	G	G
Ab19	-1	0	0	0	-	-	-	-	-	-	-	T	G	.	.	C	G	C	A	-	.	A	T	T	G	C	G	C	C	C	C	C	-	-	-	-	-	T	G	G	T	A	T	T	C	C	G	G	G
Ab20	-1	0	0	0	-	-	-	-	-	-	-	T	G	.	.	C	G	C	A	-	.	A	T	T	G	C	G	C	C	C	C	C	-	-	-	-	-	T	G	G	T	A	T	T	C	C	G	G	G
Ab21	-1	0	0	0	-	-	-	-	-	-	-	T	G	.	.	C	G	C	A	-	.	R	T	T	G	C	G	C	C	C	S	C	-	-	-	-	-	W	R	K	T	A	T	T	C	Y	G	G	K
B22	-1	0	0	0	-	-	-	-	-	-	-	W	R	.	.	C	G	C	A	-	.	W	T	T	G	C	G	C	C	C	C	C	-	-	-	-	-	T	G	G	K	A	T	T	Y	Y	G	G	G
B24	-1	0	0	0	-	-	-	-	-	-	-	T	G	.	.	C	G	C	A	-	.	A	T	T	G	C	G	C	C	C	C	C	-	-	-	-	-	T	G	G	T	A	T	T	C	C	G	G	G
B25	-1	0	0	0	-	-	-	-	-	-	-	T	G	.	.	C	G	C	A	-	.	A	T	T	G	C	G	C	C	C	C	C	-	-	-	-	-	T	G	G	T	A	T	T	C	C	G	G	G
B26	-1	0	0	0	-	-	-	-	-	-	-	T	G	.	.	C	G	C	A	-	.	A	T	T	G	C	G	C	C	C	C	C	-	-	-	-	-	T	G	G	T	A	T	T	C	C	G	G	G
B27	-1	0	0	0	-	-	-	-	-	-	-	T	G	.	.	C	G	C	A	-	.	A	T	T	G	C	G	C	C	C	C	C	-	-	-	-	-	T	G	G	T	A	T	T	C	C	G	G	G
B28	-1	0	0	0	-	-	-	-	-	-	-	T	G	.	.	C	G	C	A	-	.	A	T	T	G	C	G	C	C	C	C	C	-	-	-	-	-	T	G	G	T	A	T	T	C	C	G	G	G
B29	-1	0	0	0	-	-	-	-	-	-	-	T	G	.	.	C	G	C	A	-	.	A	T	T	G	C	G	C	C	C	T	C	-	-	-	-	-	T	G	G	T	A	T	T	C	C	G	G	G
B30	-1	0	0	0	-	-	-	-	-	-	-	T	G	.	W	C	K	C	M	-	.	A	Y	Y	S	C	S	C	C	C	C	C	-	-	-	-	-	Y	G	G	T	R	T	W	S	C	G	G	G
B32	-1	0	0	0	-	-	-	-	-	-	-	T	G	.	.	C	G	C	A	-	.	A	T	T	G	C	G	C	C	C	C	C	-	-	-	-	-	T	G	G	T	A	T	T	C	C	G	G	G
B33	-1	0	0	0	-	-	-	-	-	-	-	T	G	.	.	C	G	C	A	-	.	A	T	T	G	C	G	C	C	C	C	C	-	-	-	-	-	T	G	G	T	A	T	T	C	C	G	G	G
B34	-1	0	0	0	-	-	-	-	-	-	-	.	K	.	W	Y	S	C	M	-	.	R	T	Y	G	Y	T	C	C	C	C	C	-	-	-	-	-	Y	S	G	T	A	T	T	S	C	K	G	G
B35	-1	0	0	0	-	-	-	-	-	-	-	W	S	.	.	Y	K	C	A	-	.	A	T	T	K	Y	K	C	C	C	C	C	-	-	-	-	-	T	G	K	K	A	T	T	C	C	G	G	G
B36	-1	0	0	0	-	-	-	-	-	-	-	T	K	.	.	C	K	C	W	-	.	A	T	T	G	C	G	C	C	C	C	C	-	-	-	-	-	T	G	G	T	A	T	T	C	C	G	G	G
B37	-1	0	0	0	-	-	-	-	-	-	-	T	G	.	.	C	G	C	A	-	.	A	T	T	G	C	G	C	C	C	C	C	-	-	-	-	-	T	G	G	T	A	T	T	C	C	G	G	G
B38	-1	0	0	0	-	-	-	-	-	-	-	T	G	.	.	C	G	C	A	-	.	A	Y	T	G	C	G	C	C	C	C	C	-	-	-	-	-	T	G	G	T	A	T	T	C	C	G	G	G
B39	-1	0	0	0	-	-	-	-	-	-	-	T	R	.	W	Y	G	C	A	A	M	A	T	T	G	C	G	C	C	C	T	C	C	-	-	-	-	T	S	R	T	W	Y	T	S	S	G	G	G
B41	-1	0	0	0	-	-	-	-	-	-	-	T	G	.	.	C	G	C	A	-	.	A	T	T	S	C	S	C	C	C	C	Y	-	-	-	-	-	T	G	G	T	A	T	T	C	S	G	G	G
B42	-1	0	0	0	-	-	-	-	-	-	-	T	G	.	.	C	G	C	A	-	.	A	T	T	G	C	G	C	C	C	C	C	-	-	-	-	-	T	G	G	T	A	T	T	C	C	G	G	G
B43	-1	0	0	0	-	-	-	-	-	-	-	W	S	.	W	C	G	C	A	-	.	A	T	Y	G	C	S	C	C	C	T	C	-	-	-	-	-	T	G	G	K	R	K	K	G	C	G	K	G
B44	-1	0	0	0	-	-	-	-	-	-	-	T	G	.	.	C	G	C	A	-	.	A	T	T	G	C	G	C	C	C	C	C	-	-	-	-	-	T	G	G	T	A	T	T	C	C	G	G	G
D48	-1	0	0	0	-	-	-	-	-	-	-	T	G	.	.	C	G	C	A	-	.	A	T	T	G	C	G	C	C	C	C	C	-	-	-	-	-	T	G	G	T	A	T	T	C	C	G	G	G
D49	-1	0	0	0	-	-	-	-	-	-	-	T	G	.	.	C	G	C	A	-	.	A	T	T	G	C	G	C	C	C	T	C	-	-	-	-	-	T	G	G	T	A	T	T	C	C	G	G	G
D50	-1	0	0	0	-	-	-	-	-	-	-	T	G	.	.	C	G	C	A	-	.	A	T	T	G	C	G	C	C	C	T	C	-	-	-	-	-	T	G	G	T	A	T	T	C	C	G	G	G
D51	-1	0	0	0	-	-	-	-	-	-	-	T	R	W	R	C	R	Y	M	-	.	A	Y	Y	G	S	S	C	C	C	Y	Y	-	-	-	-	-	T	G	G	Y	A	Y	T	C	C	G	G	G
D52	-1	0	0	0	-	-	-	-	-	-	-	T	G	.	.	C	G	C	A	-	.	A	T	T	G	C	G	C	C	C	T	C	-	-	-	-	-	T	G	G	T	A	T	T	C	C	G	G	G
D53	-1	0	0	0	-	-	-	-	-	-	-	T	G	.	.	C	G	C	A	-	.	A	T	T	G	C	S	C	C	C	C	C	-	-	-	-	-	T	G	G	T	A	T	T	C	C	G	G	G
D54	-1	0	0	0	-	-	-	-	-	-	-	T	G	.	.	C	G	C	A	-	.	A	T	T	G	C	S	C	C	C	C	C	-	-	-	-	-	T	G	G	T	A	T	T	C	C	G	G	G
D55	-1	0	0	0	T	G	-	T	W	T	C	G	G	Y	.	C	T	C	A	-	G	A	C	T	G	C	.	A	C	C	T	T	-	C	A	G	A	C	A	G	K	G	T	T	C	A	T	G	G
D56	-1	0	0	0	-	-	-	-	-	-	-	T	G	.	.	C	S	.	M	-	.	A	T	T	G	C	M	M	C	C	T	Y	-	-	-	-	-	K	G	G	W	A	T	T	C	C	S	G	G
E57	-1	0	0	0	-	-	-	-	-	-	-	T	G	.	.	C	G	C	A	-	.	A	T	T	G	C	G	C	C	C	T	C	-	-	-	-	-	T	G	G	T	A	T	T	C	C	G	G	G
E58	-1	0	0	0	-	-	-	-	-	-	-	T	G	.	.	C	G	C	A	-	.	A	T	T	G	C	G	C	C	C	T	C	-	-	-	-	-	T	G	G	T	A	T	T	C	C	G	G	G
F59	-1	0	0	0	-	-	-	-	-	-	-	T	G	.	.	Y	K	C	A	-	.	A	T	T	G	C	G	C	C	C	T	C	-	-	-	-	-	T	G	G	T	A	T	K	C	C	G	G	G
F60	-1	0	0	0	-	-	-	-	-	-	-	T	G	.	.	C	G	C	A	-	.	A	T	T	G	C	G	C	C	C	C	C	-	-	-	-	-	T	G	G	T	A	T	T	C	C	G	G	G
F61	-1	0	0	0	-	-	-	-	-	-	-	T	G	.	.	C	G	C	A	-	.	A	T	T	G	C	G	C	C	C	T	C	-	-	-	-	-	T	G	G	T	A	T	T	C	C	G	G	G
F62	-1	0	0	0	-	-	-	-	-	-	-	T	T	T	M	T	T	C	A	-	S	C	C	.	G	C	G	C	A	T	T	C	G	G	-	-	-	T	G	A	A	G	T	T	G	T	T	G	T
F63	-1	0	0	0	-	-	-	-	-	-	-	T	G	.	.	C	G	C	A	-	.	A	T	T	G	C	G	C	C	C	T	C	-	-	-	-	-	T	G	G	T	A	T	T	C	C	G	G	G
G64	-1	0	0	0	-	-	-	-	-	-	-	T	G	.	.	C	G	C	A	-	.	A	T	T	G	C	G	C	C	C	T	C	-	-	-	-	-	T	G	G	T	A	T	T	C	C	G	G	G
G65	-1	0	0	0	-	-	-	-	-	-	-	T	G	.	.	C	G	C	A	-	.	A	T	T	G	C	G	C	C	C	C	C	-	-	-	-	-	T	G	G	T	A	T	T	Y	C	G	G	G
G66	-1	0	0	0	-	-	-	-	-	-	-	T	G	.	.	C	G	C	A	-	.	A	T	T	G	C	G	C	C	C	C	C	-	-	-	-	-	T	G	G	T	A	T	T	C	C	G	G	G
G67	-1	0	0	0	-	-	-	-	-	-	-	T	G	.	.	C	G	C	M	-	.	W	T	T	G	C	G	C	C	C	Y	C	-	-	-	-	-	T	G	G	T	A	T	T	C	C	G	G	G
G68	-1	0	0	0	-	-	-	-	-	-	-	T	G	.	.	C	G	C	A	-	.	A	T	T	G	C	G	C	C	C	T	C	-	-	-	-	-	T	G	G	T	A	T	T	C	C	G	G	G
G69	-1	0	0	0	-	-	-	-	-	-	-	T	G	.	.	C	G	C	A	-	.	A	T	T	G	C	G	C	C	C	C	C	-	-	-	-	-	T	G	G	T	A	T	T	C	C	G	G	G
G70	-1	0	0	0	-	-	-	-	-	-	-	T	S	.	.	C	G	C	A	-	.	A	T	T	G	C	G	C	C	C	T	C	-	-	-	-	-	T	G	G	K	A	T	T	C	C	G	G	G
J74	-1	0	0	0	-	-	-	-	-	-	-	T	G	.	.	C	G	C	A	-	.	A	T	T	G	C	G	C	C	C	T	C	-	-	-	-	-	T	G	G	T	A	T	T	C	C	G	G	G
J76	-1	0	0	0	-	-	-	-	-	-	-	T	G	.	.	C	G	C	A	-	.	A	T	T	G	C	G	C	C	C	T	C	-	-	-	-	-	T	G	G	T	A	T	T	C	C	G	G	G
J77	-1	0	0	0	-	-	-	-	-	-	-	T	G	.	.	C	G	C	A	-	.	A	T	T	G	C	G	C	C	C	T	C	-	-	-	-	-	T	G	G	T	A	T	T	C	C	G	G	G
J78	-1	0	0	0	-	-	-	-	-	-	-	T	G	.	.	C	G	C	A	-	.	A	T	T	G	C	S	C	C	C	C	C	-	-	-	-	-	T	G	G	T	A	T	T	C	C	G	G	G
J79	-1	0	0	0	-	-	-	-	-	-	-	T	G	.	.	C	G	C	A	-	.	A	T	T	G	C	G	C	C	C	C	C	-	-	-	-	-	T	G	G	T	A	T	T	C	C	G	G	G
J80	-1	0	0	0	-	-	-	-	-	-	-	T	G	.	.	C	G	C	A	-	.	A	T	T	G	C	G	C	C	C	T	C	-	-	-	-	-	T	G	G	T	A	T	T	C	C	G	G	G
J81	-1	0	0	0	-	-	-	-	-	-	-	T	G	.	M	M	G	C	A	-	.	A	T	T	G	C	G	C	C	C	C	M	-	-	-	-	-	T	G	G	T	A	T	T	C	S	G	G	G
J82	-1	0	0	0	-	-	-	-	-	-	-	T	G	.	.	C	G	C	A	-	.	A	T	T	G	C	G	C	C	C	C	C	-	-	-	-	-	T	G	G	T	A	T	T	C	C	G	G	G
J83	-1	0	0	0	-	-	-	-	-	-	-	T	G	.	.	C	G	C	A	-	.	A	T	T	G	C	G	C	C	C	C	C	-	-	-	-	-	T	G	G	T	A	T	T	C	C	G	G	G
J84	-1	0	0	0	-	-	-	-	-	-	-	T	G	.	.	C	G	C	A	-	.	A	T	T	G	C	G	C	C	C	C	C	-	-	-	-	-	T	G	G	T	A	T	T	C	C	G	G	G
J85	-1	0	0	0	-	-	-	-	-	-	-	T	G	.	.	C	G	C	A	-	.	A	T	T	G	C	G	C	C	C	C	C	-	-	-	-	-	T	G	G	T	A	T	T	C	C	G	G	G
F86	-1	0	0	0	-	-	-	-	-	-	-	T	G	.	.	C	G	C	A	-	.	A	T	T	G	C	G	C	C	C	C	C	-	-	-	-	-	T	G	G	T	A	T	T	C	C	G	G	G
KU855474.1	-1	0	0	0	-	-	-	-	-	-	-	T	G	.	.	C	G	C	A	-	A	G	T	T	G	C	G	C	C	C	G	A	-	-	-	-	-	-	A	G	C	C	A	T	C	C	G	G	C
	7	7	7	7	7	7	7	7	7	7	7	7	7	7	7	7	7	7	7	7	7	7	7	7	7	7	7	7	7	7	7	7	7	7	7	7	7	7	7	7	7	7	7	7	7	7	7	7	7
	0	0	0	0	0	0	0	1	1	1	1	1	1	1	1	1	1	2	2	2	2	2	2	2	2	2	2	3	3	3	3	3	3	3	3	3	3	4	4	4	4	4	4	4	4	4	4	5	5
	3	4	5	6	7	8	9	0	1	2	3	4	5	6	7	8	9	0	1	2	3	4	5	6	7	8	9	0	1	2	3	4	5	6	7	8	9	0	1	2	3	4	5	6	7	8	9	0	1
Ab1	-1	0	0	0	-	-	-	-	-	-	-	-	-	-	-	-	-	-	-	-	-	-	-	-	-	-	-	-	-	-	-	-	-	-	-	-	-	-	-	-	-	-	-	-	-	-	-	-	-
Ab2	-1	0	0	0	-	-	-	-	-	-	-	-	-	-	-	-	-	-	-	C	C	G	A	R	C	G	T	C	-	-	-	-	-	-	-	-	-	-	-	-	-	-	-	A	T	T	G	C	T
Ab3	-1	0	0	0	-	-	-	-	-	-	-	-	-	-	-	-	-	-	-	-	-	-	-	-	-	-	-	-	-	-	-	-	-	-	-	-	-	-	-	-	-	-	-	-	-	-	-	-	-
Ab4	-1	0	0	0	-	-	-	-	-	-	-	-	-	-	-	-	-	-	-	-	-	-	-	-	-	-	-	-	-	-	-	-	-	-	-	-	-	-	-	-	-	-	-	-	-	-	-	-	-
Ab6	-1	0	0	0	-	-	-	-	-	-	-	-	-	-	-	-	-	-	-	-	-	-	-	-	-	-	-	-	-	-	-	-	-	-	-	-	-	-	-	-	-	-	-	-	-	-	-	-	-
Ab7	-1	0	0	0	-	-	-	-	-	-	-	-	-	-	-	-	-	-	-	T	Y	R	A	A	M	G	T	K	-	-	-	-	-	-	-	-	-	-	-	-	-	-	-	A	T	T	G	S	T
Ab8	-1	0	0	0	-	-	-	-	-	-	-	-	-	-	-	-	-	-	-	C	C	G	A	G	C	G	T	C	-	-	-	-	-	-	-	-	-	-	-	-	-	-	-	A	T	T	G	C	T
Ab9	-1	0	0	0	-	-	-	-	-	-	-	-	-	-	-	-	-	-	-	C	C	G	A	G	C	G	T	C	-	-	-	-	-	-	-	-	-	-	-	-	-	-	-	A	T	T	G	C	T
Ab10	-1	0	0	0	-	-	-	-	-	-	-	-	-	-	-	-	-	-	-	C	C	G	A	G	C	G	T	C	-	-	-	-	-	-	-	-	-	-	-	-	-	-	-	A	T	T	G	C	T
Ab11	-1	0	0	0	-	-	-	-	-	-	-	-	-	-	-	-	-	-	C	C	C	G	G	G	G	G	-	C	A	G	G	-	-	-	-	A	A	A	G	C	C	C	C	C	C	G	G	S	G
Ab12	-1	0	0	0	-	-	-	-	-	-	-	-	-	-	-	-	-	-	-	C	C	G	A	G	C	G	T	C	-	-	-	-	-	-	-	-	-	-	-	-	-	-	-	A	T	T	G	C	T
Ab13	-1	0	0	0	-	-	-	-	-	-	-	-	-	-	-	-	-	-	S	C	C	G	G	G	G	G	G	S	A	G	G	-	-	-	-	G	A	A	S	C	C	C	C	C	C	S	R	S	G
Ab14	-1	0	0	0	-	-	-	-	-	-	-	-	-	-	-	-	-	-	-	C	M	M	A	Y	C	G	W	M	-	-	-	-	-	-	-	-	-	-	-	-	-	-	-	M	T	T	R	C	W
G16	-1	0	0	0	-	-	-	-	-	-	-	-	-	-	-	-	-	-	-	C	C	G	A	G	C	G	T	C	-	-	-	-	-	-	-	-	-	-	-	-	-	-	-	A	T	W	G	C	T
G17	-1	0	0	0	-	-	-	-	-	-	-	-	-	-	-	-	-	-	-	-	-	-	-	-	-	-	-	-	-	-	-	-	-	-	-	-	-	-	-	-	-	-	C	A	T	T	G	M	T
Ab19	-1	0	0	0	-	-	-	-	-	-	-	-	-	-	-	-	-	-	-	C	C	G	A	G	C	G	T	C	-	-	-	-	-	-	-	-	-	-	-	-	-	-	-	A	T	T	G	C	T
Ab20	-1	0	0	0	-	-	-	-	-	-	-	-	-	-	-	-	-	-	-	C	C	R	A	G	C	G	T	C	-	-	-	-	-	-	-	-	-	-	-	-	-	-	-	A	T	T	G	C	T
Ab21	-1	0	0	0	A	C	A	A	C	C	C	T	C	G	A	G	C	C	C	C	C	G	R	G	G	G	T	G	G	C	C	T	T	G	G	G	G	A	T	C	G	T	C	A	T	T	G	C	T
B22	-1	0	0	0	-	-	-	-	-	-	-	-	-	-	-	-	-	-	-	S	Y	S	A	G	M	G	T	C	-	-	-	-	-	-	-	-	-	-	-	-	-	-	-	A	T	T	K	Y	T
B24	-1	0	0	0	-	-	-	-	-	-	-	-	-	-	-	-	-	-	-	C	C	G	A	G	C	G	T	C	-	-	-	-	-	-	-	-	-	-	-	-	-	-	-	A	T	T	G	C	T
B25	-1	0	0	0	-	-	-	-	-	-	-	-	-	-	-	-	-	-	-	C	C	G	A	G	C	G	T	C	-	-	-	-	-	-	-	-	-	-	-	-	-	-	-	A	T	T	G	C	T
B26	-1	0	0	0	-	-	-	-	-	-	-	-	-	-	-	-	-	-	-	C	C	G	A	G	C	G	T	C	-	-	-	-	-	-	-	-	-	-	-	-	-	-	-	A	T	T	G	C	T
B27	-1	0	0	0	-	-	-	-	-	-	-	-	-	-	-	-	-	-	-	C	C	G	A	G	C	G	T	C	-	-	-	-	-	-	-	-	-	-	-	-	-	-	-	A	T	T	G	C	T
B28	-1	0	0	0	-	-	-	-	-	-	-	-	-	-	-	-	-	-	-	C	C	G	A	G	C	G	T	C	-	-	-	-	-	-	-	-	-	-	-	-	-	-	-	A	T	T	G	C	T
B29	-1	0	0	0	-	-	-	-	-	-	-	-	-	-	-	-	-	-	-	C	C	G	A	G	C	G	T	C	-	-	-	-	-	-	-	-	-	-	-	-	-	-	-	A	T	T	G	C	T
B30	-1	0	0	0	-	-	-	-	-	-	-	-	-	-	-	-	-	-	-	Y	Y	G	A	G	M	G	Y	C	-	-	-	-	-	-	-	-	-	-	-	-	-	-	-	W	T	T	G	Y	Y
B32	-1	0	0	0	-	-	-	-	-	-	-	-	-	-	-	-	-	-	-	C	C	G	A	G	C	G	T	C	-	-	-	-	-	-	-	-	-	-	-	-	-	-	-	A	T	T	G	C	T
B33	-1	0	0	0	-	-	-	-	-	-	-	-	-	-	-	-	-	-	-	C	C	G	A	G	C	G	T	C	-	-	-	-	-	-	-	-	-	-	-	-	-	-	-	A	T	T	G	C	T
B34	-1	0	0	0	-	-	-	-	-	-	-	-	-	-	-	-	-	-	-	S	C	K	A	G	C	S	T	C	-	-	-	-	-	-	-	-	-	-	-	-	-	-	-	A	T	K	K	C	T
B35	-1	0	0	0	-	-	-	-	-	-	-	-	-	-	-	-	-	-	-	G	S	C	A	T	S	G	T	C	-	-	-	-	-	-	-	-	-	-	-	-	-	-	-	A	T	T	S	C	T
B36	-1	0	0	0	-	-	-	-	-	-	-	-	-	-	-	-	-	-	-	C	C	G	A	G	C	G	T	C	-	-	-	-	-	-	-	-	-	-	-	-	-	-	-	A	T	T	G	C	T
B37	-1	0	0	0	-	-	-	-	-	-	-	-	-	-	-	-	-	-	-	C	C	G	A	G	C	G	T	C	-	-	-	-	-	-	-	-	-	-	-	-	-	-	-	A	T	T	G	C	T
B38	-1	0	0	0	-	-	-	-	-	-	-	-	-	-	-	-	-	-	-	C	C	G	A	S	C	G	T	C	-	-	-	-	-	-	-	-	-	-	-	-	-	-	-	A	T	T	G	C	T
B39	-1	0	0	0	-	-	-	-	-	-	-	-	-	-	-	-	-	-	C	C	C	G	G	G	A	G	C	C	C	C	C	-	-	G	G	K	C	M	T	G	G	S	G	A	T	G	S	K	G
B41	-1	0	0	0	-	-	-	-	-	-	-	-	-	-	-	-	-	-	-	M	C	G	A	G	Y	G	T	C	-	-	-	-	-	-	-	-	-	-	-	-	-	-	-	A	T	W	G	C	T
B42	-1	0	0	0	-	-	-	-	-	-	-	-	-	-	-	-	-	-	-	C	C	G	A	G	C	G	T	C	-	-	-	-	-	-	-	-	-	-	-	-	-	-	-	A	T	T	G	C	T
B43	-1	0	0	0	-	-	-	-	-	-	-	-	-	-	-	-	-	-	-	C	C	R	A	K	S	G	T	S	-	-	-	-	-	-	-	-	-	-	-	-	-	-	-	A	T	T	G	C	T
B44	-1	0	0	0	-	-	-	-	-	-	-	-	-	-	-	-	-	-	-	C	C	G	A	G	C	G	T	C	-	-	-	-	-	-	-	-	-	-	-	-	-	-	-	A	T	T	G	C	T
D48	-1	0	0	0	-	-	-	-	-	-	-	-	-	-	-	-	-	-	-	C	C	G	A	G	C	G	T	C	-	-	-	-	-	-	-	-	-	-	-	-	-	-	-	A	T	T	G	C	T
D49	-1	0	0	0	-	-	-	-	-	-	-	-	-	-	-	-	-	-	-	C	C	G	A	G	C	G	T	C	-	-	-	-	-	-	-	-	-	-	-	-	-	-	-	A	T	T	G	C	T
D50	-1	0	0	0	-	-	-	-	-	-	-	-	-	-	-	-	-	-	-	C	C	G	A	G	C	G	T	C	-	-	-	-	-	-	-	-	-	-	-	-	-	-	-	A	T	T	G	C	T
D51	-1	0	0	0	-	-	-	-	-	-	-	-	-	-	-	-	-	-	-	S	S	G	A	G	Y	G	T	C	-	-	-	-	-	-	-	-	-	-	-	-	-	-	-	A	T	T	G	Y	T
D52	-1	0	0	0	-	-	-	-	-	-	-	-	-	-	-	-	-	-	-	C	C	G	A	G	C	G	T	C	-	-	-	-	-	-	-	-	-	-	-	-	-	-	-	A	T	T	G	C	T
D53	-1	0	0	0	-	-	-	-	-	-	-	-	-	-	-	-	-	-	-	C	C	G	A	G	C	G	T	C	-	-	-	-	-	-	-	-	-	-	-	-	-	-	-	A	T	T	G	C	T
D54	-1	0	0	0	-	-	-	-	-	-	-	-	-	-	-	-	-	-	-	C	C	G	A	G	C	G	T	C	-	-	-	-	-	-	-	-	-	-	-	-	-	-	-	A	T	T	G	C	T
D55	-1	0	0	0	-	-	-	-	-	-	-	-	-	-	-	-	-	-	C	C	C	G	G	G	G	G	-	C	A	G	G	-	-	-	-	G	A	A	R	C	C	C	C	C	C	G	G	C	G
D56	-1	0	0	0	-	-	-	-	-	-	-	-	-	-	-	-	-	-	-	S	S	G	A	R	K	G	T	C	-	-	-	-	-	-	-	-	-	-	-	-	-	-	-	A	T	T	G	C	T
E57	-1	0	0	0	-	-	-	-	-	-	-	-	-	-	-	-	-	-	-	C	C	G	A	G	C	G	T	C	-	-	-	-	-	-	-	-	-	-	-	-	-	-	-	A	T	T	G	C	T
E58	-1	0	0	0	-	-	-	-	-	-	-	-	-	-	-	-	-	-	-	C	C	G	A	G	C	G	T	C	-	-	-	-	-	-	-	-	-	-	-	-	-	-	-	A	T	T	G	C	T
F59	-1	0	0	0	-	-	-	-	-	-	-	-	-	-	-	-	-	-	-	C	C	R	A	K	C	G	T	C	-	-	-	-	-	-	-	-	-	-	-	-	-	-	-	A	T	T	G	C	T
F60	-1	0	0	0	-	-	-	-	-	-	-	-	-	-	-	-	-	-	-	C	C	G	A	K	C	G	T	C	-	-	-	-	-	-	-	-	-	-	-	-	-	-	-	A	T	T	G	C	T
F61	-1	0	0	0	-	-	-	-	-	-	-	-	-	-	-	-	-	-	-	C	C	G	A	G	C	G	T	C	-	-	-	-	-	-	-	-	-	-	-	-	-	-	-	A	T	T	G	C	T
F62	-1	0	0	0	G	A	-	-	-	-	-	-	-	-	-	-	-	-	-	G	T	G	A	G	A	G	T	T	T	C	C	-	-	-	-	-	-	-	-	-	-	-	-	R	A	G	G	T	T
F63	-1	0	0	0	-	-	-	-	-	-	-	-	-	-	-	-	-	-	-	C	C	G	A	G	C	G	T	C	-	-	-	-	-	-	-	-	-	-	-	-	-	-	-	A	T	T	G	C	T
G64	-1	0	0	0	-	-	-	-	-	-	-	-	-	-	-	-	-	-	-	C	C	G	A	G	C	G	T	C	-	-	-	-	-	-	-	-	-	-	-	-	-	-	-	A	T	T	G	C	T
G65	-1	0	0	0	-	-	-	-	-	-	-	-	-	-	-	-	-	-	-	C	C	G	A	G	C	G	T	C	-	-	-	-	-	-	-	-	-	-	-	-	-	-	-	A	T	T	G	C	T
G66	-1	0	0	0	-	-	-	-	-	-	-	-	-	-	-	-	-	-	-	C	C	G	A	G	C	G	T	C	-	-	-	-	-	-	-	-	-	-	-	-	-	-	-	A	T	T	G	C	T
G67	-1	0	0	0	-	-	-	-	-	-	-	-	-	-	-	-	-	-	-	C	C	G	A	G	M	G	T	C	-	-	-	-	-	-	-	-	-	-	-	-	-	-	-	W	T	T	G	Y	T
G68	-1	0	0	0	-	-	-	-	-	-	-	-	-	-	-	-	-	-	-	C	C	G	A	G	C	G	T	C	-	-	-	-	-	-	-	-	-	-	-	-	-	-	-	A	T	T	G	C	T
G69	-1	0	0	0	-	-	-	-	-	-	-	-	-	-	-	-	-	-	-	C	C	G	A	G	C	G	T	C	-	-	-	-	-	-	-	-	-	-	-	-	-	-	-	A	T	T	G	C	T
G70	-1	0	0	0	-	-	-	-	-	-	-	-	-	-	-	-	-	-	-	C	C	R	A	K	C	G	T	S	-	-	-	-	-	-	-	-	-	-	-	-	-	-	-	A	T	T	G	C	T
J74	-1	0	0	0	-	-	-	-	-	-	-	-	-	-	-	-	-	-	-	C	C	G	A	G	C	G	T	C	-	-	-	-	-	-	-	-	-	-	-	-	-	-	-	A	T	T	G	C	T
J76	-1	0	0	0	-	-	-	-	-	-	-	-	-	-	-	-	-	-	-	C	C	G	A	G	C	G	T	C	-	-	-	-	-	-	-	-	-	-	-	-	-	-	-	A	T	T	G	C	T
J77	-1	0	0	0	-	-	-	-	-	-	-	-	-	-	-	-	-	-	-	C	C	G	A	G	C	G	T	C	-	-	-	-	-	-	-	-	-	-	-	-	-	-	-	A	T	T	G	C	T
J78	-1	0	0	0	-	-	-	-	-	-	-	-	-	-	-	-	-	-	-	M	Y	K	A	K	C	G	T	C	-	-	-	-	-	-	-	-	-	-	-	-	-	-	-	A	T	T	G	M	K
J79	-1	0	0	0	-	-	-	-	-	-	-	-	-	-	-	-	-	-	-	C	C	G	A	G	C	G	T	C	-	-	-	-	-	-	-	-	-	-	-	-	-	-	-	A	T	T	G	C	T
J80	-1	0	0	0	-	-	-	-	-	-	-	-	-	-	-	-	-	-	-	C	C	G	A	G	C	G	T	C	-	-	-	-	-	-	-	-	-	-	-	-	-	-	-	A	T	T	G	C	T
J81	-1	0	0	0	-	-	-	-	-	-	-	-	-	-	-	-	-	-	-	C	C	K	A	G	C	G	T	C	-	-	-	-	-	-	-	-	-	-	-	-	-	-	-	A	T	T	S	C	T
J82	-1	0	0	0	-	-	-	-	-	-	-	-	-	-	-	-	-	-	-	C	C	G	A	G	C	G	T	C	-	-	-	-	-	-	-	-	-	-	-	-	-	-	-	A	T	T	G	C	T
J83	-1	0	0	0	-	-	-	-	-	-	-	-	-	-	-	-	-	-	-	C	C	G	A	G	C	G	T	C	-	-	-	-	-	-	-	-	-	-	-	-	-	-	-	A	T	T	G	C	T
J84	-1	0	0	0	-	-	-	-	-	-	-	-	-	-	-	-	-	-	-	C	C	G	A	G	C	G	T	C	-	-	-	-	-	-	-	-	-	-	-	-	-	-	-	A	T	T	G	C	T
J85	-1	0	0	0	-	-	-	-	-	-	-	-	-	-	-	-	-	-	-	C	C	G	A	G	C	G	T	C	-	-	-	-	-	-	-	-	-	-	-	-	-	-	-	A	T	T	G	C	T
F86	-1	0	0	0	-	-	-	-	-	-	-	-	-	-	-	-	-	-	-	C	C	G	A	G	C	G	T	C	-	-	-	-	-	-	-	-	-	-	-	-	-	-	-	A	T	T	G	C	T
KU855474.1	-1	0	0	0	G	T	T	G	C	C	C	-	-	-	-	-	-	C	C	C	T	A	A	G	T	C	C	C	T	T	T	-	-	-	-	-	-	-	-	-	-	-	-	G	A	C	A	C	T
	7	7	7	7	7	7	7	7	7	7	7	7	7	7	7	7	7	7	7	8	8	8	8	8	8	8	8	8	8	8	8	8	8	8	8	8	8	8	8	8	8	8	8	8	8	8	8	8	8
	8	8	8	8	8	8	8	8	8	9	9	9	9	9	9	9	9	9	9	0	0	0	0	0	0	0	0	0	0	1	1	1	1	1	1	1	1	1	1	2	2	2	2	2	2	2	2	2	2
	1	2	3	4	5	6	7	8	9	0	1	2	3	4	5	6	7	8	9	0	1	2	3	4	5	6	7	8	9	0	1	2	3	4	5	6	7	8	9	0	1	2	3	4	5	6	7	8	9
Ab1	-1	0	0	0	-	-	-	-	-	-	-	-	-	-	-	-	-	-	-	-	-	-	-	-	-	-	-	-	-	-	-	-	-	-	-	-	-	-	-	-	-	-	-	-	-	-	-	-	-
Ab2	-1	0	0	0	G	G	C	C	C	C	C	G	T	C	C	C	C	C	T	-	-	-	-	-	C	C	C	A	G	G	A	A	G	G	G	G	A	C	G	G	G	C	C	-	-	-	-	-	C
Ab3	-1	0	0	0	-	-	-	-	-	-	-	-	-	-	-	-	-	-	-	-	-	-	-	-	-	-	-	-	-	-	-	-	-	-	-	-	-	-	-	-	-	-	-	-	-	-	-	-	-
Ab4	-1	0	0	0	-	-	-	-	-	-	-	-	-	-	-	-	-	-	-	-	-	-	-	-	-	-	-	-	-	-	-	-	-	-	-	-	-	-	-	-	-	-	-	-	-	-	-	-	-
Ab6	-1	0	0	0	-	-	-	-	-	-	-	-	-	-	-	-	-	-	-	-	-	-	-	-	-	-	-	-	-	-	-	-	-	-	-	-	-	-	-	-	-	-	-	-	-	-	-	-	-
Ab7	-1	0	0	0	G	G	S	C	C	C	C	C	T	M	C	C	C	C	A	-	-	-	-	T	A	C	C	M	G	G	A	A	A	G	G	G	R	C	G	G	G	G	Y	-	-	-	-	-	C
Ab8	-1	0	0	0	G	S	C	C	C	C	C	S	T	C	C	C	C	C	T	-	-	-	-	-	C	C	C	A	G	G	A	A	G	G	G	G	M	C	S	G	G	C	C	-	-	-	-	-	S
Ab9	-1	0	0	0	G	G	C	C	C	C	C	G	T	C	C	C	C	C	T	-	-	-	-	-	C	C	C	A	G	G	A	A	G	G	G	G	A	C	G	G	G	C	C	-	-	-	-	-	C
Ab10	-1	0	0	0	G	G	C	C	C	C	C	G	T	C	C	C	C	C	T	-	-	-	-	-	C	C	C	A	G	G	A	A	G	G	G	G	A	C	G	G	G	C	C	-	-	-	-	-	C
Ab11	-1	0	0	0	C	A	A	C	A	G	G	G	T	A	C	A	A	A	T	A	G	A	-	C	M	M	G	G	A	T	G	G	G	A	G	G	A	C	G	G	A	C	A	C	C	C	C	G	C
Ab12	-1	0	0	0	G	G	C	C	C	C	C	G	T	C	C	C	C	C	T	-	-	-	-	-	C	C	C	A	G	G	A	A	G	G	G	G	A	C	G	G	G	C	C	-	-	-	-	-	C
Ab13	-1	0	0	0	C	A	M	C	R	G	G	G	M	A	C	M	A	A	T	A	G	R	R	Y	W	C	R	G	A	T	R	G	G	A	G	G	A	C	G	C	C	C	A	C	C	C	C	C	C
Ab14	-1	0	0	0	G	G	S	C	C	M	C	G	T	C	C	C	C	G	W	Y	T	K	T	G	R	R	C	G	G	G	C	C	C	G	G	G	A	M	R	G	G	C	C	-	-	-	-	-	Y
G16	-1	0	0	0	G	G	C	C	C	C	C	G	T	C	C	C	C	C	T	-	-	-	-	-	C	C	C	A	G	G	A	A	G	G	G	G	A	C	G	G	G	C	C	-	-	-	-	-	Y
G17	-1	0	0	0	G	G	C	C	C	C	C	K	T	M	C	C	C	C	T	-	-	-	-	-	C	C	C	A	G	G	A	A	G	G	R	R	A	S	G	G	G	C	C	-	-	-	-	-	C
Ab19	-1	0	0	0	G	G	C	C	C	C	C	G	T	C	C	C	C	C	T	-	-	-	-	-	C	C	C	A	G	G	A	A	G	G	G	G	A	C	G	G	G	C	C	-	-	-	-	-	C
Ab20	-1	0	0	0	G	G	C	C	C	C	C	S	T	C	C	C	C	C	T	-	-	-	-	-	C	C	C	A	G	G	A	A	G	G	G	G	A	C	G	G	G	S	C	-	-	-	-	-	M
Ab21	-1	0	0	0	G	G	M	C	C	C	C	G	T	C	C	C	C	C	T	-	-	-	-	-	C	C	C	R	G	G	A	A	S	G	G	G	A	C	K	G	K	C	G	-	-	-	-	-	S
B22	-1	0	0	0	G	G	C	C	C	C	C	K	T	C	C	C	C	C	Y	-	-	-	-	-	C	C	C	M	G	R	A	A	R	G	G	G	A	C	G	G	S	C	C	-	-	-	-	-	C
B24	-1	0	0	0	G	G	C	C	C	C	C	G	T	C	C	C	C	C	T	G	-	-	-	-	T	T	C	T	A	G	G	G	G	G	G	G	A	C	G	G	G	C	C	-	-	-	-	-	C
B25	-1	0	0	0	G	G	C	C	C	C	C	G	T	C	C	C	C	C	T	-	-	-	-	-	C	C	C	A	G	G	A	A	G	G	G	G	A	C	G	G	G	C	C	-	-	-	-	-	C
B26	-1	0	0	0	G	G	C	C	C	C	C	G	T	C	C	C	C	C	T	-	-	-	-	-	C	C	C	A	G	G	A	A	G	G	G	G	A	C	G	G	G	C	C	-	-	-	-	-	C
B27	-1	0	0	0	G	G	C	C	C	C	C	G	T	C	C	C	C	C	T	-	-	-	-	-	C	C	C	A	G	G	A	A	G	G	G	G	A	C	G	G	G	C	C	-	-	-	-	-	C
B28	-1	0	0	0	G	G	C	C	C	C	C	G	T	C	C	C	C	C	C	-	-	-	-	-	C	C	-	-	-	-	A	A	G	G	G	G	A	M	G	G	G	C	C	-	-	-	-	-	C
B29	-1	0	0	0	G	G	C	C	C	C	C	G	T	C	C	C	G	G	C	G	A	A	G	C	A	T	C	A	G	C	C	C	C	G	G	G	A	C	G	G	G	C	C	-	-	-	-	-	C
B30	-1	0	0	0	G	C	C	C	C	C	S	T	C	C	C	C	C	Y	C	-	-	-	-	-	C	C	A	C	R	G	A	R	G	G	G	G	A	C	R	G	G	C	C	-	-	-	-	-	C
B32	-1	0	0	0	G	G	C	C	C	C	C	G	T	C	C	C	C	C	C	-	-	-	-	-	C	C	-	-	-	-	A	A	G	G	G	G	A	C	G	G	G	C	C	-	-	-	-	-	C
B33	-1	0	0	0	G	G	C	C	C	C	C	G	T	C	C	C	C	C	T	-	-	-	-	-	C	C	C	A	G	G	A	A	G	G	G	G	A	C	G	G	G	C	C	-	-	-	-	-	C
B34	-1	0	0	0	G	G	C	C	C	C	C	S	Y	C	C	C	C	C	T	-	-	-	-	-	C	C	C	A	G	K	A	M	S	G	G	G	A	S	G	G	G	C	C	-	-	-	-	-	C
B35	-1	0	0	0	G	G	C	C	C	C	C	G	T	C	C	C	C	C	T	-	-	-	-	-	C	C	C	A	G	G	A	A	R	G	G	S	M	C	G	G	K	M	C	-	-	-	-	-	C
B36	-1	0	0	0	G	G	C	C	C	C	C	G	T	C	C	C	C	C	T	-	-	-	-	-	Y	C	C	A	S	G	A	A	G	G	G	G	A	C	G	G	G	S	M	-	-	-	-	-	C
B37	-1	0	0	0	G	G	C	C	C	C	C	G	T	C	C	C	C	C	T	-	-	-	-	-	C	C	C	A	G	G	A	A	G	G	G	G	A	C	G	G	G	C	C	-	-	-	-	-	C
B38	-1	0	0	0	G	G	C	C	C	C	C	G	T	C	C	C	C	C	T	-	-	-	-	-	C	C	C	A	G	G	A	A	G	G	G	G	A	C	G	G	G	S	C	-	-	-	-	-	S
B39	-1	0	0	0	G	C	C	C	C	C	A	S	Y	C	C	C	R	R	W	-	-	-	-	T	C	T	Y	T	A	A	G	C	C	G	G	G	A	C	G	G	G	C	C	G	T	C	C	C	C
B41	-1	0	0	0	G	G	C	C	C	C	C	G	T	C	C	C	C	C	T	-	-	-	-	-	C	C	C	A	G	G	A	A	G	G	G	G	R	C	G	G	G	C	C	-	-	-	-	-	M
B42	-1	0	0	0	G	G	C	C	C	C	C	G	T	C	C	C	C	C	C	-	-	-	-	-	C	C	-	-	-	-	A	A	G	G	G	G	A	C	G	G	G	C	C	-	-	-	-	-	C
B43	-1	0	0	0	G	G	C	C	C	C	C	K	T	C	C	C	G	G	M	R	A	R	R	C	A	Y	C	R	G	C	C	C	C	G	R	G	A	C	R	G	G	C	C	-	-	-	-	-	C
B44	-1	0	0	0	G	G	C	C	C	C	C	G	T	C	C	C	C	C	T	-	-	-	-	-	C	C	C	A	G	G	A	A	G	G	G	G	A	C	G	G	G	C	C	-	-	-	-	-	C
D48	-1	0	0	0	G	G	C	C	C	C	C	G	T	C	C	C	C	C	T	-	-	-	-	-	C	C	C	A	G	G	A	A	G	G	G	G	A	C	G	G	G	C	C	-	-	-	-	-	C
D49	-1	0	0	0	G	G	C	C	C	C	C	G	T	C	C	C	G	G	C	G	A	A	G	C	A	T	C	A	G	C	C	C	C	G	G	G	A	C	G	G	G	C	C	-	-	-	-	-	C
D50	-1	0	0	0	G	G	C	C	C	C	C	G	T	C	C	C	G	G	C	G	A	A	G	C	A	T	C	A	G	C	C	C	C	G	G	G	A	C	G	G	G	C	C	-	-	-	-	-	C
D51	-1	0	0	0	G	C	C	C	C	C	S	G	T	C	S	C	G	G	K	-	-	-	-	T	C	T	Y	C	M	M	-	C	C	R	G	G	R	C	G	G	R	C	C	-	-	-	-	C	-
D52	-1	0	0	0	G	G	C	C	C	C	C	G	T	C	C	C	G	G	C	G	A	A	G	C	A	T	C	A	G	C	C	C	C	G	G	G	A	C	G	G	G	C	C	-	-	-	-	-	C
D53	-1	0	0	0	G	G	C	C	C	C	C	G	T	C	C	C	C	C	T	-	-	-	-	-	C	C	C	A	G	G	A	A	G	G	G	G	A	C	G	G	G	C	C	-	-	-	-	-	C
D54	-1	0	0	0	G	G	C	C	C	C	C	G	T	C	C	C	C	C	T	-	-	-	-	-	C	C	C	A	G	G	A	A	G	G	G	G	A	C	G	G	G	C	C	-	-	-	-	-	C
D55	-1	0	0	0	C	A	A	C	A	G	G	G	W	A	C	A	A	A	T	A	G	A	-	C	A	C	G	G	A	T	G	G	G	A	G	G	A	C	G	G	A	C	A	C	C	C	C	G	A
D56	-1	0	0	0	G	T	C	C	C	C	Y	G	T	C	C	C	G	G	C	-	-	-	-	Y	C	T	C	C	A	C	-	S	C	G	G	R	R	S	G	G	G	M	C	-	-	-	-	C	A
E57	-1	0	0	0	G	G	C	C	C	C	C	G	T	C	C	C	G	G	C	G	A	A	G	C	A	T	C	A	G	C	C	C	C	G	G	G	A	C	G	G	G	C	C	-	-	-	-	-	C
E58	-1	0	0	0	G	G	C	C	C	C	C	G	T	C	C	C	G	G	C	G	A	A	G	C	A	T	C	A	G	C	C	C	C	G	G	G	A	C	G	G	G	C	C	-	-	-	-	-	C
F59	-1	0	0	0	G	G	C	C	C	C	C	G	T	C	C	C	G	G	M	G	A	A	G	C	A	T	C	A	G	C	C	C	C	G	G	G	A	C	G	G	G	C	C	-	-	-	-	-	C
F60	-1	0	0	0	G	S	C	T	T	C	C	G	T	C	C	C	T	G	G	-	-	-	-	-	-	-	T	A	R	-	-	C	G	G	G	G	A	C	G	G	G	Y	C	-	-	-	-	-	C
F61	-1	0	0	0	G	C	C	C	C	C	C	G	T	C	C	C	G	G	T	-	-	-	-	T	C	T	C	C	A	-	G	C	C	G	G	G	A	C	G	G	G	C	C	-	-	-	-	-	C
F62	-1	0	0	0	G	G	A	C	R	G	T	A	G	T	S	R	A	R	S	T	C	R	A	M	G	C	C	G	G	C	A	Y	G	A	W	K	T	Y	S	R	C	T	Y	A	T	C	G	A	C
F63	-1	0	0	0	G	G	C	C	C	C	C	G	T	C	C	C	G	G	C	K	A	A	G	C	A	T	C	A	G	C	C	C	C	G	G	G	A	C	G	G	G	C	C	-	-	-	-	-	C
G64	-1	0	0	0	G	G	C	C	C	C	C	G	T	C	C	C	G	G	C	G	A	A	G	C	A	T	C	A	G	C	C	C	C	G	G	G	A	C	G	G	G	C	C	-	-	-	-	-	C
G65	-1	0	0	0	G	G	C	C	C	C	C	G	T	C	C	Y	C	C	T	-	-	-	-	-	C	C	C	A	G	G	A	A	K	G	G	G	A	C	G	G	G	C	Y	-	-	-	-	-	C
G66	-1	0	0	0	G	G	C	C	C	C	C	G	T	C	C	C	C	C	T	-	-	-	-	-	C	C	C	A	G	G	A	A	G	G	G	G	A	C	G	G	G	C	C	-	-	-	-	-	C
G67	-1	0	0	0	G	Y	C	C	C	C	C	S	T	C	C	C	G	G	Y	-	-	-	-	Y	C	T	C	C	A	S	-	C	C	G	G	G	R	C	G	G	G	C	C	-	-	-	-	C	-
G68	-1	0	0	0	G	G	C	C	C	C	C	G	T	C	C	C	G	G	C	G	A	A	G	C	A	T	C	A	G	C	C	C	C	G	G	G	A	C	G	G	G	C	C	-	-	-	-	-	C
G69	-1	0	0	0	G	G	C	C	C	C	C	G	T	C	C	C	C	C	T	-	-	-	-	-	C	C	C	A	G	G	A	A	G	G	G	G	A	C	G	G	G	C	C	-	-	-	-	-	C
G70	-1	0	0	0	G	G	C	C	C	C	C	G	T	C	C	C	G	G	M	G	A	A	G	C	A	T	C	A	G	C	C	C	C	G	G	G	A	C	G	G	G	C	C	-	-	-	-	-	M
J74	-1	0	0	0	G	T	C	C	C	C	C	G	T	C	C	C	G	G	Y	-	-	-	-	T	C	T	C	C	A	-	S	C	C	G	G	G	A	C	G	G	G	C	C	-	-	-	-	-	C
J76	-1	0	0	0	G	G	C	C	C	C	C	G	T	C	C	C	G	G	C	G	A	A	G	C	A	T	C	A	G	C	C	C	C	G	G	G	A	C	G	G	G	C	C	-	-	-	-	-	C
J77	-1	0	0	0	G	G	C	C	C	C	C	G	T	C	C	C	G	G	C	G	A	A	G	C	A	T	C	A	G	C	C	C	C	G	G	G	A	C	G	G	G	C	C	-	-	-	-	-	C
J78	-1	0	0	0	G	K	C	C	C	C	C	G	T	C	C	C	C	C	T	-	-	-	-	-	C	C	C	A	G	G	A	A	R	G	G	G	A	C	G	G	G	Y	C	-	-	-	-	-	M
J79	-1	0	0	0	G	G	C	C	C	C	C	G	T	C	C	C	C	C	Y	-	-	-	-	-	C	C	C	A	G	G	A	A	G	G	G	G	A	C	G	G	G	C	C	-	-	-	-	-	C
J80	-1	0	0	0	G	C	C	C	C	C	-	G	T	C	C	C	G	G	T	-	-	-	-	T	C	T	C	C	A	A	G	C	C	G	G	G	A	C	G	G	G	C	C	-	-	-	-	-	C
J81	-1	0	0	0	G	G	C	C	C	C	C	G	T	C	C	C	C	C	T	-	-	-	-	-	C	C	C	A	G	G	A	A	G	G	G	G	M	C	G	G	R	M	M	-	-	-	-	-	S
J82	-1	0	0	0	G	G	C	C	C	C	C	G	T	C	C	C	C	C	T	-	-	-	-	-	C	C	C	A	G	G	A	A	G	G	G	G	A	C	G	G	G	C	C	-	-	-	-	-	C
J83	-1	0	0	0	G	G	C	C	C	C	C	G	T	C	C	C	C	C	T	-	-	-	-	-	C	C	C	A	G	G	A	A	G	G	G	G	A	C	G	G	G	C	C	-	-	-	-	-	C
J84	-1	0	0	0	G	G	C	C	C	C	C	G	T	C	C	C	C	C	T	-	-	-	-	-	C	C	C	A	G	G	A	A	G	G	G	G	A	C	G	G	G	C	C	-	-	-	-	-	C
J85	-1	0	0	0	G	G	C	C	C	C	C	G	T	C	C	C	C	C	T	-	-	-	-	-	C	C	C	A	G	G	A	A	G	G	G	G	A	C	G	G	G	C	C	-	-	-	-	-	C
F86	-1	0	0	0	G	G	C	C	C	C	C	G	T	C	C	C	C	C	C	-	-	-	-	-	C	C	-	-	-	-	A	A	G	G	G	G	A	C	G	G	G	C	C	-	-	-	-	-	C
KU855474.1	-1	0	0	0	G	A	T	G	A	T	G	G	C	C	T	C	C	C	G	T	G	G	G	C	C	T	C	G	A	C	T	C	G	C	G	G	T	T	G	G	T	C	T	A	A	A	T	T	T
	8	8	8	8	8	8	8	8	8	8	8	8	8	8	8	8	8	8	8	8	8	8	8	8	8	8	8	8	8	8	8	8	8	8	8	8	8	8	8	8	8	9	9	9	9	9	9	9	9
	5	6	6	6	6	6	6	6	6	6	6	7	7	7	7	7	7	7	7	7	7	8	8	8	8	8	8	8	8	8	8	9	9	9	9	9	9	9	9	9	9	0	0	0	0	0	0	0	0
	9	0	1	2	3	4	5	6	7	8	9	0	1	2	3	4	5	6	7	8	9	0	1	2	3	4	5	6	7	8	9	0	1	2	3	4	5	6	7	8	9	0	1	2	3	4	5	6	7
Ab1	-1	0	0	0	-	-	-	-	-	-	-	-	-	-	-	-	-	-	-	-	-	-	-	-	-	-	-	-	-	-	-	-	-	-	-	-	-	-	-	-	-	-	-	-	-	-	-	-	-
Ab2	-1	0	0	0	-	-	-	C	A	G	C	G	G	C	G	G	C	A	C	C	-	-	G	Y	G	T	C	C	G	G	T	C	C	T	C	-	R	A	G	C	G	T	A	T	G	G	G	A	A
Ab3	-1	0	0	0	-	-	-	-	-	-	-	-	-	-	-	-	-	-	-	-	-	-	-	-	-	-	-	-	-	-	-	-	-	-	-	-	-	-	-	-	-	-	-	-	-	-	-	-	-
Ab4	-1	0	0	0	-	-	-	-	-	-	-	-	-	-	-	-	-	-	-	-	-	-	-	-	-	-	-	-	-	-	-	-	-	-	-	-	-	-	-	-	-	-	-	-	-	-	-	-	-
Ab6	-1	0	0	0	-	-	-	-	-	-	-	-	-	-	-	-	-	-	-	-	-	-	-	-	-	-	-	-	-	-	-	-	-	-	-	-	-	-	-	-	-	-	-	-	-	-	-	-	-
Ab7	-1	0	0	0	-	-	-	S	C	G	C	A	K	K	A	C	A	G	M	Y	-	-	M	M	K	G	S	M	C	G	T	A	C	C	C	G	A	A	C	S	K	T	W	T	G	S	A	R	R
Ab8	-1	0	0	0	-	-	-	C	A	G	S	G	G	S	G	G	C	R	C	C	-	-	G	T	G	T	C	C	G	G	T	C	M	T	C	-	G	A	R	C	G	T	A	W	G	G	G	A	A
Ab9	-1	0	0	0	-	-	-	S	A	G	C	G	G	M	G	G	C	A	C	C	-	-	G	Y	G	T	C	C	G	G	Y	C	C	T	C	-	G	A	G	C	G	K	A	T	G	G	G	A	A
Ab10	-1	0	0	0	-	-	-	C	A	G	C	G	G	C	G	G	C	A	C	C	-	-	G	T	G	T	C	C	G	G	T	C	C	T	C	-	G	A	G	C	G	T	A	T	G	G	G	A	A
Ab11	-1	0	0	0	-	-	-	-	-	G	C	A	T	C	C	A	A	A	C	A	-	-	C	T	C	G	G	Y	A	A	T	G	A	T	C	C	T	T	C	C	G	C	A	G	G	T	T	C	A
Ab12	-1	0	0	0	A	G	G	Y	A	G	C	G	G	C	G	G	C	A	C	C	-	-	G	T	G	T	C	C	G	G	T	C	C	T	C	-	G	A	G	C	G	T	A	C	-	-	-	-	-
Ab13	-1	0	0	0	-	-	-	-	-	G	G	A	T	C	C	T	G	A	C	C	-	-	C	T	C	C	C	G	C	A	T	G	A	T	C	T	G	G	G	A	G	G	A	C	G	C	C	C	A
Ab14	-1	0	0	0	-	-	-	M	R	Y	C	K	Y	C	G	G	R	W	C	C	-	-	K	K	T	C	C	C	A	A	G	M	S	K	M	A	C	C	T	S	C	A	A	W	G	G	T	A	G
G16	-1	0	0	0	-	-	-	C	A	G	C	G	G	C	G	G	C	A	C	C	-	-	G	T	G	T	C	C	G	G	T	C	C	T	C	-	G	A	G	C	G	T	A	T	G	G	G	A	A
G17	-1	0	0	0	-	-	-	-	A	S	C	G	G	C	G	G	C	A	C	M	-	-	C	G	G	K	C	C	G	G	T	C	C	T	C	W	A	A	G	-	G	T	A	T	G	G	G	A	A
Ab19	-1	0	0	0	-	-	-	C	A	G	C	G	G	C	G	G	C	A	C	C	-	-	G	T	G	T	C	C	G	G	T	C	C	T	C	-	G	A	G	C	G	T	A	T	G	G	G	A	A
Ab20	-1	0	0	0	-	-	-	M	A	R	C	G	G	C	G	G	M	A	C	C	-	-	G	T	G	T	C	C	G	G	T	C	C	T	C	-	R	A	G	M	G	T	A	T	G	G	G	A	A
Ab21	-1	0	0	0	-	-	-	T	W	Y	C	G	C	C	A	A	A	T	C	C	-	-	G	W	G	T	C	C	G	G	W	C	C	K	C	S	A	C	G	C	G	T	A	K	G	G	R	A	A
B22	-1	0	0	0	-	-	-	C	A	G	S	G	G	S	G	G	C	M	C	C	-	-	G	T	G	T	C	S	G	G	C	T	C	C	T	M	G	A	G	C	R	T	A	T	G	G	G	A	A
B24	-1	0	0	0	-	-	-	C	A	G	C	G	G	C	G	G	C	A	C	C	-	-	G	T	G	T	C	C	G	G	T	C	C	T	C	-	G	A	G	C	G	T	A	T	G	G	G	A	A
B25	-1	0	0	0	-	-	-	C	A	G	C	G	G	C	G	G	C	A	C	C	-	-	G	T	G	T	C	C	G	G	T	C	C	T	C	-	G	A	G	C	G	T	A	T	G	G	G	A	A
B26	-1	0	0	0	-	-	-	C	A	R	C	G	G	S	G	G	C	A	C	C	-	-	G	T	G	T	C	C	G	G	T	C	C	T	C	-	G	A	G	C	G	T	A	T	G	G	G	A	A
B27	-1	0	0	0	-	-	-	C	A	G	C	G	G	C	G	G	C	A	C	C	-	-	G	T	G	T	C	C	G	G	T	C	C	T	C	-	G	A	G	C	G	T	A	T	G	G	G	A	A
B28	-1	0	0	0	-	-	-	M	A	G	C	G	G	C	G	G	C	A	C	C	-	-	G	T	G	T	C	C	G	G	T	C	C	T	C	-	G	A	G	C	G	T	A	T	G	G	G	A	A
B29	-1	0	0	0	-	-	-	C	A	G	C	G	G	C	G	G	C	A	C	C	-	-	G	T	G	T	C	C	G	G	T	C	C	T	C	-	G	A	G	C	G	T	A	T	G	G	G	G	-
B30	-1	0	0	0	-	-	-	C	A	G	C	G	G	R	G	R	C	A	C	C	-	-	G	K	S	T	C	C	R	S	-	T	C	Y	Y	C	G	A	R	Y	G	T	A	T	R	G	G	A	A
B32	-1	0	0	0	-	-	-	C	A	G	C	G	G	C	G	G	C	A	C	C	-	-	G	T	G	T	C	C	G	G	T	C	C	T	C	-	G	A	G	C	G	T	A	T	G	G	G	A	A
B33	-1	0	0	0	-	-	-	C	A	G	C	G	G	C	G	G	C	A	C	C	-	-	G	T	G	T	C	C	G	G	T	C	C	T	C	C	G	A	G	C	G	T	A	T	G	G	G	A	A
B34	-1	0	0	0	-	-	-	C	A	R	C	G	G	C	S	G	S	R	C	C	-	-	S	Y	G	W	C	C	G	K	W	Y	S	K	S	-	G	A	Y	C	K	K	A	W	G	G	G	A	A
B35	-1	0	0	0	-	-	-	R	G	C	C	C	T	C	S	A	R	M	S	C	-	-	A	W	G	K	S	C	G	G	T	C	C	T	C	-	R	A	S	Y	G	T	A	K	G	G	K	A	A
B36	-1	0	0	0	-	-	-	C	A	R	M	G	G	C	R	G	C	R	C	C	-	-	G	Y	S	Y	C	C	G	G	T	C	C	T	C	S	R	A	C	C	T	T	A	W	G	G	G	A	A
B37	-1	0	0	0	-	-	-	C	A	G	C	G	G	C	G	G	C	A	C	C	-	-	G	T	G	T	C	C	C	C	C	C	T	C	C	-	C	A	G	G	A	A	G	G	G	G	A	C	G
B38	-1	0	0	0	-	-	-	C	A	G	C	G	G	C	G	G	G	A	C	C	G	S	G	T	G	T	C	C	G	G	T	C	C	T	C	-	G	A	G	C	G	T	A	T	G	G	G	A	A
B39	-1	0	0	0	-	-	-	C	A	K	T	G	G	C	G	G	T	A	C	C	-	-	T	A	A	T	C	C	S	G	Y	C	M	T	C	-	Y	T	S	S	R	W	A	T	G	G	K	R	-
B41	-1	0	0	0	-	-	-	C	A	G	C	G	G	C	G	G	C	R	C	C	-	-	G	T	G	T	C	C	G	G	T	C	Y	T	C	-	G	A	G	C	G	T	A	T	G	G	G	A	A
B42	-1	0	0	0	-	-	-	C	A	G	C	G	G	C	G	G	C	A	C	C	-	-	G	T	G	T	C	C	G	G	T	C	C	T	C	-	G	A	G	C	G	T	A	T	G	G	G	A	A
B43	-1	0	0	0	-	-	-	S	A	G	S	G	C	S	G	G	K	C	M	C	-	-	G	G	S	T	C	C	G	R	T	C	C	T	M	-	R	A	G	W	G	Y	A	T	G	G	G	K	-
B44	-1	0	0	0	-	-	-	C	A	G	C	G	G	C	G	G	C	A	C	C	-	-	G	T	G	T	C	C	G	G	T	C	C	T	C	-	G	A	G	C	G	T	A	T	G	G	G	A	A
D48	-1	0	0	0	-	-	-	C	A	G	C	G	G	C	G	G	C	A	C	C	-	-	G	T	G	T	C	C	G	G	T	C	C	T	C	-	G	A	G	C	G	T	A	T	G	G	G	A	A
D49	-1	0	0	0	-	-	-	C	A	G	C	G	G	C	G	G	S	A	C	C	-	-	G	T	G	T	C	C	G	G	T	C	C	T	C	-	G	A	G	C	G	T	A	T	G	G	G	G	-
D50	-1	0	0	0	-	-	-	C	A	G	C	G	G	C	G	G	C	A	C	C	-	-	G	T	G	T	C	C	G	G	T	C	C	T	C	-	G	A	G	C	G	T	A	T	G	G	G	G	-
D51	-1	0	0	0	-	-	-	M	M	G	M	S	M	S	G	R	M	A	M	Y	-	-	S	Y	S	Y	C	C	G	G	S	C	C	S	M	-	S	A	G	Y	G	K	R	K	G	G	G	G	-
D52	-1	0	0	0	-	-	-	C	A	G	C	G	G	C	G	G	C	A	C	C	-	-	G	T	G	T	C	C	G	G	T	C	C	T	C	-	G	A	G	C	G	T	A	T	G	G	G	G	-
D53	-1	0	0	0	-	-	-	C	A	G	C	G	G	C	G	G	C	R	C	C	-	-	G	T	G	T	C	C	G	G	T	C	C	T	C	-	G	A	G	C	G	T	A	T	G	G	G	A	A
D54	-1	0	0	0	-	-	-	C	A	G	C	G	G	C	G	G	C	R	C	C	-	-	G	T	G	T	C	C	G	G	T	C	C	T	C	-	G	A	G	C	G	T	A	T	G	G	G	A	A
D55	-1	0	0	0	-	-	-	-	-	G	C	A	T	C	C	A	A	A	C	A	-	-	C	T	C	G	G	T	A	A	T	G	A	T	C	C	T	T	C	C	G	C	A	G	G	T	T	C	A
D56	-1	0	0	0	-	-	-	S	A	G	C	S	G	Y	R	G	M	R	C	C	-	-	G	T	G	T	C	C	G	M	W	C	C	T	M	-	G	A	G	Y	R	K	A	T	G	G	G	G	-
E57	-1	0	0	0	-	-	-	C	A	G	C	G	G	C	G	G	C	A	C	C	-	-	G	T	G	T	C	C	G	G	T	C	C	T	C	-	G	A	G	C	G	T	A	T	G	G	G	G	-
E58	-1	0	0	0	-	-	-	C	A	G	C	G	G	C	G	G	C	A	C	C	-	-	G	T	G	T	C	C	G	G	T	C	C	T	C	-	G	A	G	C	G	T	A	T	G	G	G	G	-
F59	-1	0	0	0	-	-	-	C	M	S	C	G	G	C	G	S	S	A	C	C	-	-	G	T	G	T	Y	C	S	G	T	Y	C	T	C	-	G	A	G	S	G	T	A	T	G	G	K	G	-
F60	-1	0	0	0	-	-	-	M	A	G	K	G	K	C	G	G	C	M	Y	C	-	-	A	T	G	T	C	Y	G	G	T	C	C	T	C	-	G	A	S	C	G	T	A	T	G	G	G	G	-
F61	-1	0	0	0	-	-	-	C	A	G	C	G	G	C	G	G	C	A	C	C	-	-	G	T	G	T	C	C	G	G	T	C	C	T	C	-	G	A	G	T	G	T	A	T	G	G	G	G	-
F62	-1	0	0	0	T	T	S	Y	T	A	M	G	C	C	G	G	C	A	Y	G	-	-	A	W	K	T	Y	S	R	C	T	Y	A	T	C	-	G	A	C	C	G	W	A	C	G	R	T	S	T
F63	-1	0	0	0	-	-	-	C	A	G	C	G	G	C	G	G	C	A	C	C	C	T	G	T	G	T	C	C	G	G	T	C	C	-	-	-	G	A	G	C	G	T	A	T	G	G	G	G	-
G64	-1	0	0	0	-	-	-	C	A	G	C	G	G	C	G	G	C	A	C	C	-	-	G	T	G	T	C	C	G	G	T	C	C	T	C	-	G	A	G	C	G	T	A	T	G	G	G	G	-
G65	-1	0	0	0	-	-	-	C	A	G	C	G	G	C	G	G	C	A	C	C	-	-	G	T	G	W	C	C	G	G	T	C	C	T	C	-	G	A	G	C	G	T	A	T	G	G	G	A	A
G66	-1	0	0	0	-	-	-	C	A	G	C	G	G	C	G	G	C	A	C	C	-	-	G	T	G	T	C	C	G	G	T	C	C	T	C	-	G	A	G	C	G	T	A	T	G	G	G	A	A
G67	-1	0	0	0	-	-	-	M	A	G	M	G	G	G	G	G	M	A	C	C	-	-	G	K	G	T	C	C	G	S	Y	C	C	T	M	-	G	A	G	K	G	T	A	T	G	G	G	G	-
G68	-1	0	0	0	-	-	-	C	A	G	C	G	G	C	G	G	C	A	C	C	-	-	G	T	G	T	C	C	G	G	T	C	C	T	C	-	G	A	G	C	G	T	A	T	G	G	G	G	-
G69	-1	0	0	0	-	-	-	C	A	G	C	G	G	C	G	G	C	A	C	C	-	-	G	T	G	T	C	C	G	G	T	C	C	T	C	-	G	A	G	C	G	T	A	T	G	G	G	A	A
G70	-1	0	0	0	-	-	-	C	A	K	C	G	G	C	G	G	Y	A	C	C	-	-	G	T	G	T	C	C	G	G	T	C	C	T	C	-	R	A	G	S	G	T	A	T	G	G	G	K	-
J74	-1	0	0	0	-	-	-	C	A	G	C	G	G	C	G	G	C	A	C	C	-	-	G	T	G	T	C	C	G	G	T	C	C	T	M	-	G	A	G	T	G	T	A	T	G	G	G	G	-
J76	-1	0	0	0	-	-	-	C	A	G	C	G	G	C	G	G	C	A	C	C	-	-	G	T	G	T	C	C	G	G	T	C	C	T	C	-	G	A	G	C	G	T	A	T	G	G	G	G	-
J77	-1	0	0	0	-	-	-	C	A	G	C	G	G	C	G	G	C	A	C	C	-	-	G	T	G	T	C	C	G	G	T	C	C	T	C	-	G	A	G	C	G	T	A	T	G	G	G	G	-
J78	-1	0	0	0	-	-	-	S	A	S	S	G	K	M	S	G	Y	W	C	C	-	-	G	Y	G	T	C	C	G	G	T	C	M	T	C	-	G	A	R	W	G	T	A	T	G	G	K	A	A
J79	-1	0	0	0	-	-	-	C	A	G	C	G	G	C	G	G	C	A	C	C	-	-	G	T	G	T	C	C	G	G	T	C	C	T	C	-	G	A	G	C	G	T	A	T	G	G	G	A	A
J80	-1	0	0	0	-	-	-	C	A	G	C	G	G	C	G	G	C	A	C	C	-	-	G	T	G	T	C	C	G	G	T	C	C	T	C	-	G	A	G	T	G	T	A	T	G	G	G	G	-
J81	-1	0	0	0	-	-	-	C	A	G	S	G	G	C	G	G	C	R	Y	C	-	-	G	T	G	T	C	C	G	G	T	C	C	T	C	-	G	A	G	C	G	T	A	W	G	G	G	A	A
J82	-1	0	0	0	-	-	-	C	A	G	C	G	G	C	G	G	C	A	C	C	-	-	G	T	G	T	C	C	G	G	T	C	C	T	C	-	G	A	G	C	G	T	A	T	G	G	G	A	A
J83	-1	0	0	0	-	-	-	C	A	G	C	G	G	C	G	G	C	A	C	C	-	-	G	T	G	T	C	C	G	G	T	C	C	T	C	-	G	A	G	C	G	T	A	T	G	G	G	A	A
J84	-1	0	0	0	-	-	-	C	A	G	C	G	G	C	G	G	C	A	C	C	-	-	G	T	G	T	C	C	G	G	T	C	C	T	C	-	G	A	G	C	G	T	A	T	G	G	G	A	A
J85	-1	0	0	0	-	-	-	C	A	G	C	G	G	C	G	G	C	A	C	C	-	-	G	T	G	T	C	C	G	G	T	C	C	T	C	-	G	A	G	C	G	T	A	T	G	G	G	A	A
F86	-1	0	0	0	-	-	-	C	A	G	C	G	G	C	G	G	C	A	C	C	-	-	G	T	G	T	C	C	G	G	T	C	C	T	C	-	G	A	G	C	G	T	A	T	G	G	G	A	A
KU855474.1	-1	0	0	0	-	-	-	C	G	G	C	A	G	C	C	G	T	G	G	C	A	-	A	C	A	G	G	T	G	G	T	C	G	T	C	-	G	A	T	G	A	T	T	C	G	G	T	G	C
	9	9	9	9	9	9	9	9	9	9	9	9	9	9	9	9	9	9	9	9	9	9	9	9	9	9	9	9	9	9	9	9	9	9	9	9	9	9	9	9	9	9	9	9	9	9	9	9	9
	3	3	3	4	4	4	4	4	4	4	4	4	4	5	5	5	5	5	5	5	5	5	5	6	6	6	6	6	6	6	6	6	6	7	7	7	7	7	7	7	7	7	7	8	8	8	8	8	8
	7	8	9	0	1	2	3	4	5	6	7	8	9	0	1	2	3	4	5	6	7	8	9	0	1	2	3	4	5	6	7	8	9	0	1	2	3	4	5	6	7	8	9	0	1	2	3	4	5
Ab1	-1	0	0	0	-	-	-	-	-	-	-	-	-	-	-	-	-	-	-	-	-	-	-	-	-	-	-	-	-	-	-	-	-	-	-	-	-	-	-	-	-	-	-	-	-	-	-	-	-
Ab2	-1	0	0	0	-	-	-	-	-	-	-	-	-	T	T	T	T	-	-	-	G	T	-	C	A	C	C	C	G	C	T	C	-	C	T	G	T	A	G	G	T	C	C	G	G	C	C	G	G
Ab3	-1	0	0	0	-	-	-	-	-	-	-	-	-	-	-	-	-	-	-	-	-	-	-	-	-	-	-	-	-	-	-	-	-	-	-	-	-	-	-	-	-	-	-	-	-	-	-	-	-
Ab4	-1	0	0	0	-	-	-	-	-	-	-	-	-	-	-	-	-	-	-	-	-	-	-	-	-	-	-	-	-	-	-	-	-	-	-	-	-	-	-	-	-	-	-	-	-	-	-	-	-
Ab6	-1	0	0	0	-	-	-	-	-	-	-	-	-	-	-	-	-	-	-	-	-	-	-	-	-	-	-	-	-	-	-	-	-	-	-	-	-	-	-	-	-	-	-	-	-	-	-	-	-
Ab7	-1	0	0	0	-	-	-	-	-	-	-	-	-	K	T	W	W	-	-	-	-	W	C	W	C	C	C	T	G	C	T	C	T	W	G	A	G	A	R	G	Y	C	C	G	G	C	C	G	G
Ab8	-1	0	0	0	C	G	G	M	M	G	C	A	A	C	T	T	T	T	T	C	-	W	-	C	M	C	C	C	Y	C	T	C	-	C	T	G	T	A	G	G	K	S	C	G	G	G	C	G	G
Ab9	-1	0	0	0	-	G	G	A	A	G	C	A	A	Y	T	T	T	T	T	T	G	T	-	C	A	C	C	C	G	C	T	C	-	C	T	G	T	A	G	G	T	C	C	G	G	C	C	G	G
Ab10	-1	0	0	0	-	-	-	-	-	-	-	-	-	T	T	T	T	-	-	T	G	T	-	C	A	C	C	C	G	C	T	C	-	C	T	G	T	A	G	G	T	C	C	G	G	C	C	G	G
Ab11	-1	0	0	0	-	-	-	-	-	-	-	-	-	-	-	-	-	-	-	-	-	-	-	T	G	A	T	C	C	T	T	C	-	-	C	G	C	A	G	G	T	W	C	A	C	C	T	A	C
Ab12	-1	0	0	0	-	-	-	-	-	-	-	-	-	T	T	T	T	-	-	T	G	T	-	C	A	C	C	C	G	C	T	C	-	C	T	G	T	A	G	G	K	S	C	G	G	C	C	G	G
Ab13	-1	0	0	0	-	-	-	-	-	-	-	-	-	-	C	C	T	C	C	C	K	C	A	K	G	A	T	C	A	T	T	C	-	-	A	G	C	R	R	G	A	Y	C	W	Y	C	T	A	A
Ab14	-1	0	0	0	-	-	-	-	-	-	-	-	-	-	-	-	-	W	A	G	G	T	S	A	Y	M	C	C	T	C	G	C	T	G	A	A	T	A	T	G	A	G	S	G	G	T	C	C	G
G16	-1	0	0	0	-	-	-	-	-	-	-	-	-	T	T	T	T	-	-	-	G	T	-	C	A	C	C	C	G	C	T	C	-	C	T	G	T	A	G	G	T	C	C	G	G	C	C	G	G
G17	-1	0	0	0	-	-	-	-	-	-	-	-	-	T	T	T	T	T	-	-	G	T	-	C	A	G	T	S	S	C	K	C	-	-	C	R	W	A	G	G	T	A	Y	G	G	C	S	R	R
Ab19	-1	0	0	0	-	-	-	-	-	-	-	-	-	T	T	T	T	-	-	-	G	T	-	C	A	C	C	C	G	C	T	C	-	C	T	G	T	A	G	G	T	C	C	G	G	C	C	G	G
Ab20	-1	0	0	0	-	-	-	-	-	-	-	-	-	T	T	T	T	-	-	-	G	T	-	C	A	C	C	S	G	S	T	C	-	M	T	G	T	W	G	G	K	C	C	R	G	C	C	G	G
Ab21	-1	0	0	0	-	-	-	-	-	-	-	-	-	T	M	S	T	R	-	-	G	K	-	M	A	M	C	C	C	Y	T	C	-	-	C	G	T	A	G	S	S	W	Y	W	G	C	Y	K	G
B22	-1	0	0	0	-	-	-	-	-	-	-	-	-	T	T	T	T	-	-	-	K	T	-	C	A	C	C	T	C	C	T	T	-	C	C	G	G	A	A	G	K	Y	C	S	G	G	C	G	G
B24	-1	0	0	0	-	-	-	-	-	-	-	-	-	T	T	T	T	-	-	-	G	T	-	C	A	C	C	C	G	C	T	C	-	C	C	G	T	A	G	G	T	C	C	G	G	C	C	G	G
B25	-1	0	0	0	-	-	-	-	-	-	-	-	-	T	T	T	T	-	-	-	G	T	-	C	A	C	C	C	G	C	T	C	-	C	T	G	T	A	G	G	T	C	C	G	G	C	C	G	G
B26	-1	0	0	0	-	-	-	-	-	-	-	-	-	T	T	T	T	-	-	-	G	T	-	C	A	C	C	C	G	C	T	C	-	C	T	G	T	A	G	G	K	C	C	G	G	S	C	G	G
B27	-1	0	0	0	-	-	-	-	-	-	-	-	-	T	T	T	T	T	-	-	G	T	-	C	A	C	C	C	G	C	T	C	-	C	T	G	T	A	G	G	T	C	C	G	G	C	C	G	G
B28	-1	0	0	0	-	-	-	-	-	-	-	-	-	T	T	T	T	T	-	T	G	T	-	C	A	C	C	C	G	C	T	C	-	C	T	G	T	A	G	G	T	C	C	G	G	C	C	G	G
B29	-1	0	0	0	-	-	-	-	-	-	-	-	-	C	T	C	T	-	-	-	G	T	-	C	A	C	C	C	G	C	T	C	-	G	T	G	T	A	G	G	T	C	C	G	G	C	C	G	G
B30	-1	0	0	0	-	-	-	-	-	-	-	-	-	T	T	T	Y	-	-	-	R	T	-	C	A	C	C	C	G	C	T	C	-	Y	Y	G	T	A	G	G	T	C	C	M	C	C	Y	T	W
B32	-1	0	0	0	-	-	-	-	-	-	-	-	-	T	T	T	T	T	-	T	G	T	-	C	A	C	C	C	G	C	T	C	-	C	T	G	T	A	G	G	T	C	C	G	G	C	C	G	G
B33	-1	0	0	0	-	-	-	-	-	-	-	-	-	T	T	T	T	T	-	-	G	T	-	C	A	C	C	C	G	C	T	C	-	C	T	G	T	A	G	G	T	C	C	G	G	C	C	G	G
B34	-1	0	0	0	-	-	-	-	-	-	-	-	-	T	T	T	K	T	-	-	S	Y	-	C	A	C	C	R	S	Y	T	C	-	S	Y	G	K	A	G	S	T	C	T	Y	G	S	C	C	G
B35	-1	0	0	0	-	-	-	-	-	-	-	-	-	T	T	K	T	T	-	-	G	Y	-	C	W	S	C	C	S	C	T	C	-	C	T	G	W	A	S	S	T	-	W	S	S	T	Y	Y	K
B36	-1	0	0	0	-	-	-	-	-	-	-	-	-	T	T	T	T	-	-	-	G	T	-	C	M	C	C	C	G	C	T	C	T	Y	T	G	T	A	G	G	T	C	C	G	G	C	C	G	G
B37	-1	0	0	0	-	-	-	-	-	-	-	-	-	A	A	A	G	-	-	-	G	C	A	G	C	G	G	C	G	G	C	A	-	C	C	G	T	G	T	C	T	C	C	G	G	C	C	G	G
B38	-1	0	0	0	-	-	-	-	-	-	-	-	-	T	T	T	T	-	-	-	G	T	-	C	M	C	C	C	S	S	T	C	-	C	W	G	W	A	G	G	T	C	C	G	G	C	C	G	S
B39	-1	0	0	0	-	-	-	-	-	-	-	-	-	G	T	M	K	-	-	-	G	T	-	C	A	C	C	C	M	Y	T	S	-	M	A	G	Y	A	C	G	R	A	C	K	W	-	S	C	G
B41	-1	0	0	0	-	-	-	-	-	-	-	-	-	-	C	T	T	T	T	T	G	T	-	C	A	C	C	C	S	C	T	C	-	C	T	G	K	A	G	G	K	C	C	G	G	S	C	G	G
B42	-1	0	0	0	-	-	-	-	-	-	-	-	-	T	T	T	T	T	-	T	G	T	-	C	A	C	C	C	G	C	T	C	-	C	T	G	T	A	G	G	T	C	C	G	G	C	C	G	G
B43	-1	0	0	0	-	-	-	-	-	-	-	-	-	K	T	C	T	-	-	-	G	T	-	C	A	C	C	C	R	C	T	C	-	G	T	G	T	A	G	G	T	C	C	G	G	C	C	G	G
B44	-1	0	0	0	-	-	-	-	-	-	-	-	-	T	T	T	T	-	-	-	G	T	-	C	A	C	C	C	G	C	T	C	-	C	T	G	T	A	G	G	T	C	C	G	G	C	C	G	G
D48	-1	0	0	0	-	-	-	-	-	-	-	-	-	T	T	T	T	-	-	-	G	T	-	C	A	C	C	C	G	C	T	C	-	C	T	G	T	A	G	G	T	C	C	G	G	C	C	G	G
D49	-1	0	0	0	-	-	-	-	-	-	-	-	-	S	T	C	T	-	-	-	G	T	-	C	A	C	C	C	G	C	T	C	-	G	T	G	T	A	K	G	T	C	C	G	G	C	C	G	G
D50	-1	0	0	0	-	-	-	-	-	-	-	-	-	C	T	C	T	-	-	-	G	T	-	C	A	C	C	C	G	C	T	C	-	G	T	G	T	A	G	G	T	C	C	G	G	C	C	G	G
D51	-1	0	0	0	-	-	-	-	-	-	-	-	-	S	T	S	K	-	-	-	G	T	-	C	A	C	C	C	A	Y	T	S	-	G	Y	G	W	A	G	A	R	T	C	G	G	T	C	C	S
D52	-1	0	0	0	-	-	-	-	-	-	-	-	-	C	T	C	T	-	-	-	G	T	-	C	A	C	C	C	G	C	T	C	-	G	T	G	T	A	G	G	T	C	C	G	G	C	C	G	G
D53	-1	0	0	0	-	-	-	-	-	-	-	-	-	T	T	T	-	-	-	T	G	T	-	C	A	C	C	C	G	C	T	C	-	C	T	G	T	A	G	G	T	C	C	G	G	M	C	G	G
D54	-1	0	0	0	-	-	-	-	-	-	-	-	-	T	T	T	-	-	-	T	G	T	-	C	A	C	C	C	G	C	T	C	-	C	T	G	T	A	G	G	T	C	C	G	G	M	C	G	G
D55	-1	0	0	0	-	-	-	-	-	-	-	-	-	-	-	-	-	-	-	-	-	-	-	-	-	-	-	-	-	-	T	C	-	-	C	K	C	A	G	G	T	T	C	A	C	C	T	A	C
D56	-1	0	0	0	-	-	-	-	-	-	-	-	-	M	T	C	T	-	-	-	G	T	-	C	A	C	C	M	A	C	T	C	-	G	C	G	T	A	K	G	S	C	M	G	K	-	C	C	G
E57	-1	0	0	0	-	-	-	-	-	-	-	-	-	C	T	C	T	-	-	-	G	T	A	C	A	C	C	C	G	C	T	C	-	G	T	G	T	A	G	G	T	C	C	G	G	C	C	G	G
E58	-1	0	0	0	-	-	-	-	-	-	-	-	-	C	T	C	T	-	-	-	G	T	-	C	A	C	C	C	G	C	T	C	-	G	T	G	T	A	G	G	T	C	C	G	G	C	C	G	G
F59	-1	0	0	0	-	-	-	-	-	-	-	-	-	Y	T	C	T	-	-	-	G	Y	-	C	M	C	C	C	G	C	T	C	-	G	W	G	T	A	G	G	C	C	C	C	K	C	C	G	A
F60	-1	0	0	0	-	-	-	-	-	-	-	-	-	Y	T	T	T	-	-	-	G	T	-	C	A	C	C	C	G	C	T	C	-	C	C	G	T	A	G	G	T	C	C	A	G	C	T	G	G
F61	-1	0	0	0	-	-	-	-	-	-	-	-	-	C	T	C	C	-	-	-	G	T	-	C	A	C	C	C	A	C	T	C	-	G	T	G	T	A	G	G	C	C	C	G	G	-	C	C	G
F62	-1	0	0	0	-	-	-	-	-	-	-	-	-	C	W	T	T	-	-	-	G	Y	-	C	A	T	T	S	Y	T	G	K	G	G	T	R	G	A	R	G	K	M	Y	K	G	Y	M	K	C
F63	-1	0	0	0	-	-	-	-	-	-	-	-	-	C	T	C	T	-	-	-	G	T	-	C	A	C	C	C	G	C	T	C	-	G	T	G	T	A	G	G	T	C	C	G	G	C	C	G	G
G64	-1	0	0	0	-	-	-	-	-	-	-	-	-	C	T	C	T	-	-	-	G	T	-	C	A	C	C	C	G	C	T	C	-	G	T	G	T	A	G	G	T	C	C	G	G	C	C	G	G
G65	-1	0	0	0	-	-	-	-	-	-	-	-	-	T	T	T	K	C	G	T	R	T	-	S	R	S	M	M	G	C	T	Y	-	C	T	K	T	W	K	G	T	C	C	G	R	C	C	S	G
G66	-1	0	0	0	-	-	-	-	-	-	-	-	-	T	T	T	T	-	-	T	G	T	-	C	A	C	C	C	G	C	T	C	-	C	T	G	T	A	G	G	T	C	C	G	G	Y	C	G	G
G67	-1	0	0	0	-	-	-	-	-	-	-	-	-	Y	T	C	T	-	-	-	G	T	-	C	W	C	C	C	A	C	T	C	-	G	S	G	T	A	G	R	S	C	C	G	G	C	C	G	G
G68	-1	0	0	0	-	-	-	-	-	-	-	-	-	C	T	C	T	-	-	-	G	T	-	C	A	C	C	C	G	C	T	C	-	G	T	G	T	A	G	G	T	C	C	G	G	C	C	G	G
G69	-1	0	0	0	-	-	-	-	-	-	-	-	-	T	T	T	T	T	-	-	G	T	-	C	A	C	C	C	G	C	T	C	-	C	T	G	T	A	G	G	T	C	C	G	G	C	C	G	G
G70	-1	0	0	0	-	-	-	-	-	-	-	-	-	C	T	C	T	-	-	-	G	T	-	C	A	C	C	C	S	C	T	C	-	G	T	G	T	A	G	G	T	C	C	G	G	C	C	G	G
J74	-1	0	0	0	-	-	-	-	-	-	-	-	-	C	T	C	T	-	-	-	G	T	-	C	A	C	C	C	A	C	T	C	-	G	T	G	T	A	G	R	C	C	C	G	G	-	C	C	G
J76	-1	0	0	0	-	-	-	-	-	-	-	-	-	C	T	C	T	-	-	-	G	T	-	C	A	C	C	C	G	C	T	C	-	G	T	G	T	A	G	G	T	C	C	G	G	C	C	G	G
J77	-1	0	0	0	-	-	-	-	-	-	-	-	-	C	T	C	T	-	-	-	G	T	-	C	A	C	C	C	G	C	T	C	-	G	T	G	T	A	G	G	T	C	C	G	G	C	C	G	G
J78	-1	0	0	0	-	-	-	-	-	-	-	-	-	T	T	T	Y	-	-	-	G	T	-	C	Y	Y	C	Y	G	C	T	C	-	Y	W	G	K	A	G	G	Y	C	C	G	G	S	C	G	G
J79	-1	0	0	0	-	-	-	-	-	-	-	-	-	T	T	T	T	-	-	-	G	T	-	C	A	C	C	C	G	C	T	C	-	C	T	G	T	A	G	G	T	C	C	G	G	C	C	G	G
J80	-1	0	0	0	-	-	-	-	-	-	-	-	-	C	T	C	T	-	-	-	G	T	-	C	A	C	T	C	A	C	T	C	-	G	T	G	T	A	G	G	T	C	C	G	G	-	C	C	G
J81	-1	0	0	0	-	-	-	-	-	-	-	-	-	-	C	T	T	T	T	T	G	G	-	C	A	C	C	C	G	C	T	C	-	C	A	G	G	A	G	G	G	C	C	G	G	G	C	G	G
J82	-1	0	0	0	-	-	-	-	-	-	-	-	-	T	T	T	T	T	-	-	G	T	-	C	A	C	C	C	G	C	T	C	-	C	T	G	T	A	G	G	T	C	C	G	G	C	C	G	G
J83	-1	0	0	0	-	-	-	-	-	-	-	-	-	T	T	T	T	T	-	-	G	T	-	C	A	C	C	C	G	C	T	C	-	C	T	G	T	A	G	G	T	C	C	G	G	C	C	G	G
J84	-1	0	0	0	-	-	-	-	-	-	-	-	-	T	T	T	T	T	-	-	G	T	-	C	A	C	C	C	G	C	T	C	-	C	T	G	T	A	G	G	T	C	C	G	G	C	C	G	G
J85	-1	0	0	0	-	-	-	-	-	-	-	-	-	T	T	T	-	-	-	T	G	T	-	C	A	C	C	C	G	C	T	C	-	C	T	G	T	A	G	G	T	C	C	G	G	C	C	G	G
F86	-1	0	0	0	-	-	-	-	-	-	-	-	-	T	T	T	T	T	-	T	G	T	-	C	A	C	C	C	G	C	T	C	-	C	T	G	T	A	G	G	T	C	C	G	G	C	C	G	G
KU855474.1	-1	0	0	0	-	-	-	-	-	-	-	A	G	A	C	C	C	C	A	C	A	A	A	C	T	T	G	A	C	C	C	C	G	A	T	G	C	A	C	C	C	C	A	C	T	T	C	G	G
	1	1	1	1	1	1	1	1	1	1	1	1	1	1	1	1	1	1	1	1	1	1	1	1	1	1	1	1	1	1	1	1	1	1	1	1	1	1	1	1	1	1	1	1	1	1	1	1	1
	0	0	0	0	0	0	0	0	0	0	0	0	0	0	0	0	0	0	0	0	0	0	0	0	0	0	0	0	0	0	0	0	0	0	0	0	0	0	0	0	0	0	0	0	0	0	0	0	0
	1	1	1	1	1	2	2	2	2	2	2	2	2	2	2	3	3	3	3	3	3	3	3	3	3	4	4	4	4	4	4	4	4	4	4	5	5	5	5	5	5	5	5	5	5	6	6	6	6
	5	6	7	8	9	0	1	2	3	4	5	6	7	8	9	0	1	2	3	4	5	6	7	8	9	0	1	2	3	4	5	6	7	8	9	0	1	2	3	4	5	6	7	8	9	0	1	2	3
Ab1	-1	0	0	0	-	-	-	-	-	-	-	-	-	-	-	-	-	-	-	-	-	-	-	-	-	-	-	-	-	-	-	-	-	-	-	-	-	-	-	-	-	-	-	-	-	-	-	-	-
Ab2	-1	0	0	0	-	-	-	-	-	-	-	-	-	-	-	-	-	-	-	-	-	-	-	-	-	-	-	-	-	-	-	-	-	-	-	-	-	-	-	-	-	T	A	A	C	C	A	G	G
Ab3	-1	0	0	0	-	-	-	-	-	-	-	-	-	-	-	-	-	-	-	-	-	-	-	-	-	-	-	-	-	-	-	-	-	-	-	-	-	-	-	-	-	-	-	-	-	-	-	-	-
Ab4	-1	0	0	0	-	-	-	-	-	-	-	-	-	-	-	-	-	-	-	-	-	-	-	-	-	-	-	-	-	-	-	-	-	-	-	-	-	-	-	-	-	-	-	-	-	-	-	-	-
Ab6	-1	0	0	0	-	-	-	-	-	-	-	-	-	-	-	-	-	-	-	-	-	-	-	-	-	-	-	-	-	-	-	-	-	-	-	-	-	-	-	-	-	-	-	-	-	-	-	-	-
Ab7	-1	0	0	0	-	-	-	-	-	-	-	-	-	-	-	-	-	-	-	-	-	-	-	-	-	-	-	-	-	-	-	-	-	-	-	-	-	-	-	-	-	T	T	A	A	A	A	G	G
Ab8	-1	0	0	0	-	-	-	-	-	-	-	-	-	-	-	-	-	-	-	-	-	-	-	-	-	-	-	-	-	-	-	-	-	-	-	-	-	-	-	-	-	-	A	A	C	C	M	R	G
Ab9	-1	0	0	0	-	-	-	-	-	-	-	-	-	-	-	-	-	-	-	-	-	-	-	-	-	-	-	-	-	-	-	-	-	-	-	-	-	-	-	-	C	T	A	A	C	C	A	G	G
Ab10	-1	0	0	0	A	C	C	G	C	C	G	G	S	G	G	M	C	T	G	C	C	C	A	A	C	C	C	C	A	A	C	C	T	T	Y	T	T	T	T	T	C	T	A	A	C	C	A	G	G
Ab11	-1	0	0	0	-	-	-	-	-	-	-	-	-	-	-	-	-	-	-	-	-	-	-	-	-	-	-	-	-	-	-	-	-	-	-	-	-	-	-	-	-	-	-	-	-	-	-	-	-
Ab12	-1	0	0	0	-	-	-	-	-	-	-	-	-	-	-	-	-	-	-	-	-	-	-	-	-	-	-	-	-	-	-	-	-	-	-	-	-	-	-	-	-	-	-	-	-	-	-	-	-
Ab13	-1	0	0	0	-	-	-	-	-	-	-	-	-	-	-	-	-	-	-	-	-	-	-	-	-	-	-	-	-	-	-	-	-	-	-	-	-	-	-	-	-	-	-	-	-	-	-	-	-
Ab14	-1	0	0	0	-	-	-	-	-	-	-	-	-	-	-	-	-	-	-	-	-	-	-	-	-	-	-	-	-	-	-	-	-	-	-	-	-	-	-	-	-	-	-	-	-	-	-	-	-
G16	-1	0	0	0	-	-	-	-	-	-	-	-	-	-	-	-	-	-	-	-	-	-	-	-	-	-	-	-	-	-	-	-	-	-	-	-	-	-	-	T	T	T	A	A	C	C	A	G	G
G17	-1	0	0	0	-	-	-	-	-	-	-	-	-	-	-	-	-	-	-	-	-	-	-	-	-	-	-	-	-	-	-	-	-	-	-	-	-	-	-	-	-	-	-	-	-	-	-	-	-
Ab19	-1	0	0	0	-	C	G	G	S	C	G	G	M	G	G	S	C	T	G	Y	C	C	A	A	C	C	C	C	A	A	M	C	T	T	T	T	T	T	-	-	-	T	A	A	C	C	A	R	G
Ab20	-1	0	0	0	-	-	-	-	-	-	-	-	-	-	-	-	-	-	-	-	-	-	-	-	-	-	-	-	-	-	-	-	-	-	-	-	-	-	-	T	T	T	A	A	C	C	A	A	G
Ab21	-1	0	0	0	-	-	-	-	-	-	-	-	-	-	-	-	-	-	-	-	-	-	-	-	-	-	-	-	-	-	-	-	-	-	-	-	-	-	-	-	-	-	-	-	-	-	-	-	-
B22	-1	0	0	0	-	-	-	-	-	-	-	-	-	-	-	-	-	-	-	-	-	-	-	-	-	-	-	-	-	-	-	-	-	-	-	-	-	-	-	T	T	W	A	A	C	C	M	R	G
B24	-1	0	0	0	-	-	-	-	-	-	-	-	-	-	-	-	-	-	-	-	-	-	-	-	-	-	-	-	-	-	-	-	-	-	-	-	-	-	T	T	T	T	A	A	C	C	A	G	G
B25	-1	0	0	0	-	-	-	-	-	-	-	-	-	-	-	-	-	-	-	-	-	-	-	-	-	-	-	-	-	-	-	-	-	-	-	-	-	-	-	-	-	T	A	A	C	C	A	G	G
B26	-1	0	0	0	-	-	-	-	-	-	-	-	-	-	-	-	-	-	-	-	-	-	-	-	-	-	-	-	-	-	-	-	-	-	-	-	-	-	-	-	-	T	A	A	C	C	A	G	G
B27	-1	0	0	0	-	-	-	-	-	-	-	-	-	-	-	-	-	-	-	-	-	-	-	-	-	-	-	-	-	-	-	-	-	-	-	-	-	-	-	-	-	T	A	A	C	C	A	G	G
B28	-1	0	0	0	-	-	-	-	-	-	-	-	-	-	-	-	-	-	-	-	-	-	-	-	-	-	-	-	-	-	-	-	-	-	-	-	-	-	-	-	-	T	A	A	C	C	A	G	G
B29	-1	0	0	0	-	-	-	-	-	-	-	-	-	-	-	-	-	-	-	-	-	-	-	-	-	-	-	-	-	-	-	-	-	-	-	-	-	-	T	T	T	T	A	A	C	C	A	G	G
B30	-1	0	0	0	-	-	-	-	-	-	-	-	-	-	-	-	-	-	-	-	-	-	-	-	-	-	-	-	-	-	-	-	-	-	-	-	-	-	-	T	T	T	A	A	C	C	G	G	G
B32	-1	0	0	0	-	-	-	-	-	-	-	-	-	-	-	-	-	-	-	-	-	-	-	-	-	-	-	-	-	-	-	-	-	-	-	-	-	-	C	T	T	T	A	A	C	C	A	G	G
B33	-1	0	0	0	-	-	-	-	-	-	-	-	-	-	-	-	-	-	-	-	-	-	-	-	-	-	-	-	-	-	-	-	-	-	-	-	-	-	T	T	C	T	A	A	C	C	A	G	G
B34	-1	0	0	0	-	-	-	-	-	-	-	-	-	-	-	-	-	-	-	-	-	-	-	-	-	-	-	-	-	-	-	-	-	-	-	-	-	-	-	-	Y	T	A	A	C	C	A	G	G
B35	-1	0	0	0	-	-	-	-	-	-	-	-	-	-	-	-	-	-	-	-	-	-	-	-	-	-	-	-	-	-	-	-	-	-	-	-	-	-	-	-	C	C	C	C	C	C	T	G	-
B36	-1	0	0	0	-	-	-	-	-	-	-	-	-	-	-	-	-	-	-	-	-	-	-	-	-	-	-	-	-	-	-	-	-	-	-	-	-	-	-	-	T	T	A	A	C	C	A	G	G
B37	-1	0	0	0	-	-	-	-	-	-	-	-	-	-	-	-	-	-	-	-	-	-	-	-	-	-	-	-	-	-	-	-	-	-	-	-	-	-	T	T	C	T	A	A	C	C	A	G	G
B38	-1	0	0	0	-	-	-	-	-	-	-	-	-	-	-	-	-	-	-	-	-	-	-	-	-	-	-	-	-	-	-	-	-	-	-	-	-	-	-	-	-	T	A	A	C	C	A	G	G
B39	-1	0	0	0	-	-	-	-	-	-	-	-	-	-	-	-	-	-	-	-	-	-	-	-	-	-	-	-	-	-	-	-	-	-	-	-	-	-	A	C	A	S	T	G	A	A	-	-	-
B41	-1	0	0	0	-	-	-	-	-	-	-	-	-	-	-	-	-	-	-	-	-	-	-	-	-	-	-	-	-	-	-	-	-	-	-	-	-	-	-	-	-	-	A	A	C	C	A	G	G
B42	-1	0	0	0	-	-	-	-	-	-	-	-	-	-	-	-	-	-	-	-	-	-	-	-	-	-	-	-	-	-	-	-	-	-	-	-	-	-	T	T	T	T	A	A	C	C	A	G	G
B43	-1	0	0	0	-	-	-	-	-	-	-	-	-	-	-	-	-	-	-	-	-	-	-	-	-	-	-	-	-	-	-	-	-	-	-	-	-	-	T	T	T	T	A	A	C	C	A	G	G
B44	-1	0	0	0	-	-	-	-	-	-	-	-	-	-	-	-	-	-	-	-	-	-	-	-	-	-	-	-	-	-	-	-	-	-	-	-	-	-	-	T	T	T	A	A	C	C	A	G	G
D48	-1	0	0	0	-	-	-	-	-	-	-	-	-	-	-	-	-	-	-	-	-	-	-	-	-	-	-	-	-	-	-	-	-	-	-	-	-	-	-	T	T	T	A	A	C	C	A	G	G
D49	-1	0	0	0	-	-	-	-	-	-	-	-	-	-	-	-	-	-	-	-	-	-	-	-	-	-	-	-	-	-	-	-	-	-	-	-	-	-	T	T	T	T	A	A	C	C	A	G	G
D50	-1	0	0	0	-	-	-	-	-	-	-	-	-	-	-	-	-	-	-	-	-	-	-	-	-	-	-	-	-	-	-	-	-	-	-	-	-	-	T	T	T	T	A	A	C	C	A	G	G
D51	-1	0	0	0	-	-	-	-	-	-	-	-	-	-	-	-	-	-	-	-	-	-	-	-	-	-	-	-	-	-	-	-	-	-	-	-	-	-	T	T	T	A	A	A	A	G	-	-	G
D52	-1	0	0	0	-	-	-	-	-	-	-	-	-	-	-	-	-	-	-	-	-	-	-	-	-	-	-	-	-	-	-	-	-	-	-	-	-	-	T	T	T	T	A	A	C	C	A	G	G
D53	-1	0	0	0	-	-	-	-	-	-	-	-	-	-	-	-	-	-	-	-	-	-	-	-	-	-	-	-	-	-	-	-	-	-	-	-	-	-	T	T	T	T	A	A	C	C	A	G	G
D54	-1	0	0	0	-	-	-	-	-	-	-	-	-	-	-	-	-	-	-	-	-	-	-	-	-	-	-	-	-	-	-	-	-	-	-	-	-	-	T	T	T	T	A	A	C	C	A	G	G
D55	-1	0	0	0	-	-	-	-	-	-	-	-	-	-	-	-	-	-	-	-	-	-	-	-	-	-	-	-	-	-	-	-	-	-	-	-	-	-	-	-	-	-	-	-	-	-	-	-	-
D56	-1	0	0	0	-	-	-	-	-	-	-	-	-	-	-	-	-	-	-	-	-	-	-	-	-	-	-	-	-	-	-	-	-	-	-	-	-	-	T	T	T	T	A	A	C	C	C	C	G
E57	-1	0	0	0	-	-	-	-	-	-	-	-	-	-	-	-	-	-	-	-	-	-	-	-	-	-	-	-	-	-	-	-	-	-	-	-	-	-	T	T	T	T	A	A	C	C	A	G	G
E58	-1	0	0	0	-	-	-	-	-	-	-	-	-	-	-	-	-	-	-	-	-	-	-	-	-	-	-	-	-	-	-	-	-	-	-	-	-	-	T	T	T	T	A	A	C	C	A	G	G
F59	-1	0	0	0	-	-	-	-	-	-	-	-	-	-	-	-	-	-	-	-	-	-	-	-	-	-	-	-	-	-	-	-	-	-	-	-	-	-	C	T	T	T	A	A	C	C	-	-	-
F60	-1	0	0	0	-	-	-	-	-	-	-	-	-	-	-	-	-	-	-	-	-	-	-	-	-	-	-	-	-	-	-	-	-	-	-	-	-	-	C	T	T	T	A	A	C	C	A	G	G
F61	-1	0	0	0	-	-	-	-	-	-	-	-	-	-	-	-	-	-	-	-	-	-	-	-	-	-	-	-	-	-	-	-	-	-	-	-	-	-	T	T	T	T	A	A	C	C	A	G	G
F62	-1	0	0	0	-	-	-	-	-	-	-	-	-	-	-	-	-	-	-	-	-	-	-	-	-	-	-	-	-	-	-	-	-	-	-	-	-	-	-	-	C	G	A	A	A	G	A	A	T
F63	-1	0	0	0	-	-	-	-	-	-	-	-	-	-	-	-	-	-	-	-	-	-	-	-	-	-	-	-	-	-	-	-	-	-	-	-	-	-	T	T	T	T	A	A	C	C	A	G	G
G64	-1	0	0	0	-	-	-	-	-	-	-	-	-	-	-	-	-	-	-	-	-	-	-	-	-	-	-	-	-	-	-	-	-	-	-	-	-	-	T	T	T	T	A	A	C	C	A	G	G
G65	-1	0	0	0	-	-	-	-	-	-	-	-	-	-	-	-	-	-	-	-	-	-	-	-	-	-	-	-	-	-	-	-	-	-	-	-	-	-	-	-	-	-	-	-	-	-	-	-	-
G66	-1	0	0	0	-	-	-	-	-	-	-	-	-	-	-	-	-	-	-	-	-	-	-	-	-	-	-	-	-	-	-	-	-	-	-	-	-	-	T	T	C	T	A	A	C	C	A	G	G
G67	-1	0	0	0	-	-	-	-	-	-	-	-	-	-	-	-	-	-	-	-	-	-	-	-	-	-	-	-	-	-	-	-	-	-	-	-	-	-	T	T	C	T	C	T	T	C	A	A	C
G68	-1	0	0	0	-	-	-	-	-	-	-	-	-	-	-	-	-	-	-	-	-	-	-	-	-	-	-	-	-	-	-	-	-	-	-	-	-	-	T	T	T	T	A	A	C	C	A	G	G
G69	-1	0	0	0	-	-	-	-	-	-	-	-	-	-	-	-	-	-	-	-	-	-	-	-	-	-	-	-	-	-	-	-	-	-	-	-	-	-	T	T	C	T	A	A	C	C	A	G	G
G70	-1	0	0	0	-	-	-	-	-	-	-	-	-	-	-	-	-	-	-	-	-	-	-	-	-	-	-	-	-	-	-	-	-	-	-	-	-	-	T	T	T	T	A	A	C	C	A	G	G
J74	-1	0	0	0	-	-	-	-	-	-	-	-	-	-	-	-	-	-	-	-	-	-	-	-	-	-	-	-	-	-	-	-	-	-	-	-	-	-	T	T	T	T	A	A	C	C	A	G	G
J76	-1	0	0	0	-	-	-	-	-	-	-	-	-	-	-	-	-	-	-	-	-	-	-	-	-	-	-	-	-	-	-	-	-	-	-	-	-	-	T	T	T	T	A	A	C	C	A	G	G
J77	-1	0	0	0	-	-	-	-	-	-	-	-	-	-	-	-	-	-	-	-	-	-	-	-	-	-	-	-	-	-	-	-	-	-	-	-	-	-	T	T	T	T	A	A	C	C	A	G	G
J78	-1	0	0	0	-	-	-	-	-	-	-	-	-	-	-	-	-	-	-	-	-	-	-	-	-	-	-	-	-	-	-	-	-	-	-	-	-	-	-	-	-	T	C	A	C	C	A	A	G
J79	-1	0	0	0	-	-	-	-	-	-	-	-	-	-	-	-	-	-	-	-	-	-	-	-	-	-	-	-	-	-	-	-	-	-	-	-	-	T	T	T	T	A	A	A	C	C	A	G	G
J80	-1	0	0	0	-	-	-	-	-	-	-	-	-	-	-	-	-	-	-	-	-	-	-	-	-	-	-	-	-	-	-	-	-	-	-	-	-	-	T	T	T	T	A	A	C	C	A	G	G
J81	-1	0	0	0	-	-	-	-	-	-	-	-	-	-	-	-	-	-	-	-	-	-	-	-	-	-	-	-	-	-	-	-	-	-	-	-	-	-	-	-	-	-	A	A	C	C	A	A	G
J82	-1	0	0	0	-	-	-	-	-	-	-	-	-	-	-	-	-	-	-	-	-	-	-	-	-	-	-	-	-	-	-	-	-	-	-	-	-	-	T	T	T	T	A	A	C	C	A	G	G
J83	-1	0	0	0	-	-	-	-	-	-	-	-	-	-	-	-	-	-	-	-	-	-	-	-	-	-	-	-	-	-	-	-	-	-	-	-	-	-	T	T	C	T	A	A	C	C	A	G	G
J84	-1	0	0	0	-	-	-	-	-	-	-	-	-	-	-	-	-	-	-	-	-	-	-	-	-	-	-	-	-	-	-	-	-	-	-	-	-	-	T	T	C	T	A	A	C	C	A	G	G
J85	-1	0	0	0	-	-	-	-	-	-	-	-	-	-	-	-	-	-	-	-	-	-	-	-	-	-	-	-	-	-	-	-	-	-	-	-	-	-	-	-	T	T	A	A	C	C	A	G	G
F86	-1	0	0	0	-	-	-	-	-	-	-	-	-	-	-	-	-	-	-	-	-	-	-	-	-	-	-	-	-	-	-	-	-	-	-	-	-	-	C	T	T	T	A	A	C	C	A	G	G
KU855474.1	-1	0	0	0	-	-	-	-	-	-	-	-	-	-	-	-	-	-	-	-	-	-	-	-	-	-	-	-	-	-	-	-	-	-	-	-	-	-	-	-	-	-	-	-	-	-	-	-	-
	1	1	1	1	1	1	1	1	1	1	1	1	1	1	1	1	1	1	1	1	1	1	1	1	1	1	1	1	1	1	1	1	1	1	1	1	1	1	1	1	1	1	1	1	1	1	1	1	1
	0	0	0	0	0	0	0	1	1	1	1	1	1	1	1	1	1	1	1	1	1	1	1	1	1	1	1	1	1	1	1	1	1	1	1	1	1	1	1	1	1	1	1	1	1	1	1	1	1
	9	9	9	9	9	9	9	0	0	0	0	0	0	0	0	0	0	1	1	1	1	1	1	1	1	1	1	2	2	2	2	2	2	2	2	2	2	3	3	3	3	3	3	3	3	3	3	4	4
	3	4	5	6	7	8	9	0	1	2	3	4	5	6	7	8	9	0	1	2	3	4	5	6	7	8	9	0	1	2	3	4	5	6	7	8	9	0	1	2	3	4	5	6	7	8	9	0	1
Ab1	-1	0	0	0	-	-	-	-	-	-	-	-	-	-	-	-	-	-	-	-	-	-	-	-	-	-	-	-	-	-	-	-	-	-	-	-	-	-	-	-	-	-	-	-	-	-	-	-	-
Ab2	-1	0	0	0	A	T	T	T	A	-	-	-	-	-	-	-	-	-	-	-	-	-	-	-	-	C	C	T	C	G	G	A	T	C	A	G	G	K	A	R	G	G	A	A	R	S	A	W	T
Ab3	-1	0	0	0	-	-	-	-	-	-	-	-	-	-	-	-	-	-	-	-	-	-	-	-	-	-	-	-	-	-	-	-	-	-	-	-	-	-	-	-	-	-	-	-	-	-	-	-	-
Ab4	-1	0	0	0	-	-	-	-	-	-	-	-	-	-	-	-	-	-	-	-	-	-	-	-	-	-	-	-	-	-	-	-	-	-	-	-	-	-	-	-	-	-	-	-	-	-	-	-	-
Ab6	-1	0	0	0	-	-	-	-	-	-	-	-	-	-	-	-	-	-	-	-	-	-	-	-	-	-	-	-	-	-	-	-	-	-	-	-	-	-	-	-	-	-	-	-	-	-	-	-	-
Ab7	-1	0	0	0	T	T	T	T	A	-	-	-	-	-	-	-	-	-	-	-	-	-	-	-	-	-	-	-	-	-	-	A	T	C	C	C	T	A	A	T	T	T	W	A	W	Y	A	A	A
Ab8	-1	0	0	0	A	T	T	T	A	A	A	M	A	T	A	-	-	-	-	-	-	-	-	-	-	-	A	R	A	-	-	-	-	-	-	-	-	-	-	-	-	-	-	-	-	-	-	-	-
Ab9	-1	0	0	0	A	T	T	T	A	A	A	A	A	T	A	-	-	-	-	-	-	-	-	-	-	-	A	A	-	-	-	-	-	-	-	-	-	-	-	-	-	-	-	-	-	-	-	-	-
Ab10	-1	0	0	0	A	K	T	T	W	-	-	-	-	-	-	-	-	-	-	-	-	-	-	-	-	A	A	G	A	T	T	T	K	A	A	-	-	-	-	-	-	-	-	-	-	-	-	-	-
Ab11	-1	0	0	0	-	-	-	-	-	-	-	-	-	-	-	-	-	-	-	-	-	-	-	-	-	-	-	-	-	-	-	-	-	-	-	-	-	-	-	-	-	-	-	-	-	-	-	-	-
Ab12	-1	0	0	0	-	-	-	-	-	-	-	-	-	-	-	-	-	-	-	-	-	-	-	-	-	-	-	-	-	-	-	-	-	-	-	-	-	-	-	-	-	-	-	-	-	-	-	-	-
Ab13	-1	0	0	0	-	-	-	-	-	-	-	-	-	-	-	-	-	-	-	-	-	-	-	-	-	-	-	-	-	-	-	-	-	-	-	-	-	-	-	-	-	-	-	-	-	-	-	-	-
Ab14	-1	0	0	0	-	-	-	-	-	-	-	-	-	-	-	-	-	-	-	-	-	-	-	-	-	-	-	-	-	-	-	-	-	-	-	-	-	-	-	-	-	-	-	-	-	-	-	-	-
G16	-1	0	0	0	A	T	T	T	A	A	G	C	-	-	-	-	A	T	A	C	A	K	G	T	A	G	G	G	A	T	A	C	C	C	G	C	T	G	A	A	T	T	T	-	A	A	G	C	A
G17	-1	0	0	0	-	-	-	-	-	-	-	-	-	-	-	-	-	-	-	-	-	-	-	-	-	-	-	-	-	-	-	-	-	-	-	-	-	-	-	-	-	-	-	-	-	-	-	-	-
Ab19	-1	0	0	0	A	G	T	T	T	-	-	-	-	-	-	-	-	-	-	-	-	-	-	-	-	T	A	A	G	A	T	T	G	S	A	A	A	A	-	-	-	-	-	-	-	-	-	-	-
Ab20	-1	0	0	0	G	T	T	T	A	-	-	-	-	-	-	-	-	-	-	-	-	-	A	G	A	G	G	G	G	A	C	C	C	G	G	T	T	G	A	G	T	T	T	-	A	A	G	A	T
Ab21	-1	0	0	0	-	-	-	-	-	-	-	-	-	-	-	-	-	-	-	-	-	-	-	-	-	-	-	-	-	-	-	-	-	-	-	-	-	-	-	-	-	-	-	-	-	-	-	-	-
B22	-1	0	0	0	G	T	T	T	A	-	-	-	-	-	-	-	-	-	-	-	-	-	-	-	-	-	-	-	G	A	G	A	T	-	-	-	T	A	A	G	A	T	T	A	A	-	-	-	-
B24	-1	0	0	0	A	T	C	A	G	-	-	-	-	-	-	-	-	-	-	-	-	-	G	T	A	G	G	G	A	T	A	C	C	C	G	C	T	G	A	A	K	T	T	-	A	A	R	S	M
B25	-1	0	0	0	A	T	W	T	A	-	-	-	-	-	-	-	-	-	-	-	-	-	-	-	-	A	A	A	G	A	A	W	C	C	G	C	T	G	A	A	T	W	T	A	A	A	A	S	A
B26	-1	0	0	0	A	T	T	T	A	-	-	-	-	-	-	-	-	-	-	-	-	-	-	-	-	A	A	A	G	T	A	T	A	T	R	-	T	A	A	A	A	G	T	A	T	A	A	A	A
B27	-1	0	0	0	A	T	T	T	A	-	-	-	-	-	-	-	-	-	-	-	-	-	-	-	-	A	A	A	G	C	-	-	C	C	G	C	T	G	A	A	K	T	T	A	A	A	A	G	A
B28	-1	0	0	0	A	T	T	T	A	-	-	-	-	-	-	-	-	-	-	-	-	-	-	-	-	A	A	G	A	T	T	T	A	A	A	G	A	T	T	A	A	A	A	-	-	-	-	-	-
B29	-1	0	0	0	A	T	C	T	C	-	-	-	-	-	-	G	G	A	T	C	A	G	G	T	A	G	G	G	A	T	A	C	C	C	G	C	T	G	A	W	T	T	T	-	A	R	G	M	A
B30	-1	0	0	0	A	T	A	T	A	-	-	-	-	-	-	-	-	-	-	-	-	-	-	-	-	-	-	-	A	A	C	A	T	A	G	G	T	A	A	A	C	A	T	A	G	G	-	-	-
B32	-1	0	0	0	-	A	T	T	T	-	-	-	-	-	-	-	-	-	-	-	-	-	-	-	A	A	G	C	A	T	A	A	-	-	-	-	T	-	-	-	-	T	T	-	A	A	G	C	A
B33	-1	0	0	0	A	T	T	T	A	-	-	-	-	-	-	-	-	-	-	-	-	-	-	-	A	G	C	A	T	A	A	-	-	-	G	C	T	G	A	A	T	T	T	-	A	A	G	C	A
B34	-1	0	0	0	A	T	T	T	A	-	-	-	-	-	-	-	-	-	-	-	-	-	-	-	-	-	-	-	A	G	A	A	T	A	A	S	T	W	A	A	T	T	T	A	A	R	M	R	T
B35	-1	0	0	0	A	T	T	T	A	-	-	-	-	-	-	-	-	-	-	-	-	-	-	-	-	-	-	-	A	A	C	A	T	A	A	A	A	A	A	R	C	A	T	A	A	A	A	-	-
B36	-1	0	0	0	A	T	T	T	A	-	-	-	-	-	-	-	-	-	-	-	-	-	-	-	-	-	A	A	C	A	A	C	C	C	K	C	T	K	A	A	T	T	T	-	A	A	W	C	A
B37	-1	0	0	0	R	T	T	T	A	-	-	-	-	-	-	-	-	-	-	-	-	-	-	-	-	-	A	G	C	A	T	A	A	A	A	C	T	G	A	R	T	T	T	-	A	A	G	C	A
B38	-1	0	0	0	A	T	T	T	A	-	-	-	-	-	-	-	-	-	-	-	-	-	-	-	-	-	-	-	-	-	-	-	-	A	G	C	A	T	A	A	T	T	T	-	A	A	R	Y	A
B39	-1	0	0	0	-	-	-	-	-	-	-	-	-	-	-	A	A	T	T	T	A	A	G	C	A	-	-	-	-	-	-	T	A	-	A	T	T	A	A	G	Y	A	T	-	A	A	-	-	-
B41	-1	0	0	0	A	T	T	T	A	A	G	C	A	T	A	T	T	-	-	-	-	-	-	-	-	-	W	A	A	K	Y	A	T	A	A	A	T	A	A	-	-	-	-	-	-	-	-	-	-
B42	-1	0	0	0	A	T	T	T	T	-	-	-	-	-	-	-	-	-	-	-	-	-	-	-	T	A	C	C	-	-	-	-	-	C	G	C	T	G	A	A	T	T	T	T	A	A	G	C	W
B43	-1	0	0	0	A	T	T	A	-	-	-	-	-	-	-	-	-	-	-	-	-	-	-	-	-	-	-	-	A	A	A	A	C	-	R	M	T	R	A	W	T	T	A	-	A	A	A	A	A
B44	-1	0	0	0	A	T	T	T	A	-	-	-	-	-	-	-	-	-	-	-	-	-	-	-	A	G	C	A	T	C	-	-	-	C	G	C	T	G	A	A	T	T	T	-	A	A	G	C	A
D48	-1	0	0	0	A	T	T	T	-	-	-	-	-	-	-	-	-	-	-	-	-	-	-	-	-	A	C	C	-	-	-	-	-	C	G	C	T	G	A	A	T	T	T	-	A	A	G	C	A
D49	-1	0	0	0	A	T	T	T	A	-	-	-	-	-	-	-	-	-	-	-	-	-	-	-	-	-	-	-	-	-	-	-	-	-	A	G	T	G	A	A	T	T	W	-	A	A	R	M	A
D50	-1	0	0	0	A	T	T	T	A	-	-	-	-	-	-	A	G	-	-	-	-	-	-	-	-	-	-	-	A	T	A	C	C	C	G	C	T	G	A	A	T	T	T	-	A	A	K	M	A
D51	-1	0	0	0	-	-	-	-	-	-	-	-	-	-	-	A	A	T	T	T	A	A	G	A	A	-	-	-	-	-	-	T	C	C	G	C	T	G	A	A	T	T	T	-	A	A	G	M	A
D52	-1	0	0	0	A	T	T	T	-	-	-	-	-	-	-	-	-	-	-	-	-	-	-	-	-	-	G	G	A	T	A	C	C	C	G	C	T	G	A	A	T	T	T	-	A	A	G	C	A
D53	-1	0	0	0	-	A	T	T	T	-	-	-	-	-	-	-	-	-	-	-	-	-	-	-	A	A	G	C	C	C	G	Y	-	-	-	-	T	S	A	A	T	T	T	-	A	A	R	C	A
D54	-1	0	0	0	-	A	T	T	T	-	-	-	-	-	-	-	-	-	-	-	-	-	-	-	A	A	G	C	C	C	G	Y	-	-	-	-	T	S	A	A	T	T	T	-	A	A	R	C	A
D55	-1	0	0	0	-	-	-	-	-	-	-	-	-	-	-	-	-	-	-	-	-	-	-	-	-	-	-	-	-	-	-	-	-	-	-	-	-	-	-	-	-	-	-	-	-	-	-	-	-
D56	-1	0	0	0	-	-	-	-	-	-	-	-	-	-	-	A	A	T	T	T	A	A	C	-	-	-	-	-	-	-	-	C	C	C	G	C	T	G	A	A	T	T	T	-	A	A	C	C	R
E57	-1	0	0	0	A	T	T	T	-	-	-	-	-	-	-	-	-	-	-	-	-	-	-	-	-	-	-	-	-	-	-	C	C	C	G	C	T	G	A	A	T	T	T	-	A	A	G	C	A
E58	-1	0	0	0	A	T	T	T	A	-	-	-	-	-	-	A	A	T	C	-	A	G	G	T	A	G	G	G	A	T	A	C	C	C	G	C	T	G	A	A	T	T	T	-	A	A	G	M	A
F59	-1	0	0	0	-	-	-	-	-	-	-	-	-	-	-	-	-	-	-	-	-	-	-	-	-	-	-	-	-	-	-	-	-	-	-	-	-	-	-	-	-	-	-	-	-	-	-	-	-
F60	-1	0	0	0	A	T	T	A	S	-	-	-	-	-	-	-	-	-	-	-	-	-	-	-	-	-	G	G	A	T	A	C	C	C	K	C	T	R	A	A	T	T	T	-	A	A	K	C	A
F61	-1	0	0	0	-	-	-	-	-	-	-	-	-	-	-	G	G	A	T	C	A	G	G	T	A	G	G	G	A	T	A	C	C	C	G	C	T	G	A	A	T	T	T	-	A	A	G	Y	T
F62	-1	0	0	0	A	T	T	T	A	-	-	-	-	-	-	-	-	-	-	-	-	-	-	-	-	-	-	-	-	T	A	C	C	C	G	C	T	G	A	A	T	T	T	-	A	A	G	C	A
F63	-1	0	0	0	-	-	-	-	-	-	-	-	-	-	-	-	-	-	-	-	-	G	G	T	A	G	G	G	A	T	A	C	C	C	G	C	T	G	A	A	T	T	T	-	A	A	G	C	A
G64	-1	0	0	0	A	T	T	T	A	-	-	-	-	-	-	A	G	G	-	-	-	-	-	T	A	G	G	G	A	T	A	C	C	C	G	Y	T	G	A	R	T	T	T	-	A	A	G	M	A
G65	-1	0	0	0	-	-	-	-	-	-	-	-	-	-	-	-	-	-	-	-	-	-	-	-	-	-	-	-	-	-	-	-	-	-	-	-	-	-	-	-	-	-	-	-	-	-	-	-	-
G66	-1	0	0	0	C	A	G	G	T	-	-	-	-	-	-	-	-	-	-	-	-	-	-	-	A	G	G	G	A	T	A	C	C	C	G	C	T	G	A	A	T	T	T	-	A	A	G	C	A
G67	-1	0	0	0	-	-	-	-	-	-	-	-	-	-	-	-	-	-	-	-	-	-	-	-	-	-	-	-	-	-	-	-	-	-	-	-	-	-	-	-	-	-	-	-	-	-	-	-	-
G68	-1	0	0	0	C	G	G	A	-	-	-	-	-	-	-	-	-	-	-	-	-	-	-	-	-	-	-	-	T	C	A	G	G	W	A	G	G	G	A	T	A	C	C	-	C	G	Y	T	R
G69	-1	0	0	0	A	T	T	T	A	-	-	-	-	-	-	-	-	-	-	-	-	-	-	-	A	G	C	A	T	A	A	-	-	-	G	C	T	G	A	A	T	T	T	-	A	A	G	C	A
G70	-1	0	0	0	A	T	T	T	-	-	-	-	-	-	-	-	-	-	-	-	-	-	-	-	-	-	-	-	A	A	G	C	C	T	G	C	T	G	A	A	W	T	T	-	A	A	K	C	A
J74	-1	0	0	0	-	-	-	-	-	-	-	-	-	-	-	A	A	T	T	T	A	A	C	C	A	-	-	G	A	T	A	C	C	C	G	C	T	G	A	R	T	T	T	-	A	A	S	C	A
J76	-1	0	0	0	A	T	T	T	A	-	-	-	-	-	-	A	G	C	-	-	-	-	-	-	-	-	-	-	A	T	A	A	C	-	G	C	T	G	A	A	T	T	T	-	A	A	G	C	A
J77	-1	0	0	0	A	T	-	-	-	-	-	-	-	-	-	-	-	-	-	-	-	-	G	T	A	G	G	G	A	T	A	C	C	C	G	C	T	G	A	A	T	T	T	-	A	A	G	C	A
J78	-1	0	0	0	A	T	T	T	A	-	-	-	-	-	-	-	-	-	-	-	-	-	-	-	A	G	G	G	A	T	A	C	C	C	S	C	T	A	A	A	T	T	T	-	A	A	R	C	A
J79	-1	0	0	0	A	T	T	A	A	-	-	-	-	-	-	-	-	-	-	-	-	-	-	-	-	A	A	R	A	W	A	C	C	C	S	Y	W	A	A	A	T	W	W	A	A	A	M	A	W
J80	-1	0	0	0	A	T	T	T	A	A	G	C	A	T	A	A	G	A	T	C	A	G	G	T	A	G	G	G	A	T	A	C	C	C	G	C	T	G	A	R	T	T	T	-	A	A	G	C	A
J81	-1	0	0	0	A	T	T	T	A	A	T	T	A	A	A	-	-	-	-	-	-	-	-	-	-	-	A	A	A	T	A	A	C	A	A	T	T	T	A	A	K	Y	A	A	A	A	M	A	T
J82	-1	0	0	0	A	T	T	T	A	-	-	-	-	-	-	-	-	-	-	-	-	-	-	-	A	G	G	G	A	T	A	C	C	C	G	C	T	G	A	A	T	T	T	-	A	A	G	C	A
J83	-1	0	0	0	A	T	T	T	A	-	-	-	-	-	-	-	-	-	-	-	-	-	-	-	A	G	C	A	T	A	A	C	C	C	G	C	T	G	A	A	T	T	T	-	A	A	G	C	A
J84	-1	0	0	0	R	T	T	T	A	-	-	-	-	-	-	-	-	-	-	-	-	-	-	-	A	G	C	A	T	A	A	C	-	-	G	C	T	G	A	R	T	T	T	-	A	A	G	C	A
J85	-1	0	0	0	-	A	T	T	T	-	-	-	-	-	-	-	-	-	-	-	-	-	-	-	A	A	G	C	A	T	A	A	-	-	-	-	T	G	A	A	T	T	T	-	A	A	G	C	A
F86	-1	0	0	0	A	T	T	T	A	-	-	-	-	-	-	-	-	-	-	-	-	-	-	-	A	G	C	A	T	A	A	-	-	C	G	C	T	G	A	A	T	T	T	-	A	A	G	C	A
KU855474.1	-1	0	0	0	-	-	-	-	-	-	-	-	-	-	-	-	-	-	-	-	-	-	-	-	-	-	-	-	-	-	-	-	-	-	-	-	-	-	-	-	-	-	-	-	-	-	-	-	-
	1	1	1	1
	1	1	1	1
	7	7	7	7
	1	2	3	4
Ab1	-1	0	0	0	-	-	-	-
Ab2	-1	0	0	0	-	-	-	-
Ab3	-1	0	0	0	-	-	-	-
Ab4	-1	0	0	0	-	-	-	-
Ab6	-1	0	0	0	-	-	-	-
Ab7	-1	0	0	0	-	-	-	-
Ab8	-1	0	0	0	-	-	-	-
Ab9	-1	0	0	0	-	-	-	-
Ab10	-1	0	0	0	-	-	-	-
Ab11	-1	0	0	0	-	-	-	-
Ab12	-1	0	0	0	-	-	-	-
Ab13	-1	0	0	0	-	-	-	-
Ab14	-1	0	0	0	-	-	-	-
G16	-1	0	0	0	-	-	-	-
G17	-1	0	0	0	-	-	-	-
Ab19	-1	0	0	0	-	-	-	-
Ab20	-1	0	0	0	-	-	-	-
Ab21	-1	0	0	0	-	-	-	-
B22	-1	0	0	0	-	-	-	-
B24	-1	0	0	0	-	-	-	-
B25	-1	0	0	0	-	-	-	-
B26	-1	0	0	0	-	-	-	-
B27	-1	0	0	0	-	-	-	-
B28	-1	0	0	0	-	-	-	-
B29	-1	0	0	0	-	-	-	-
B30	-1	0	0	0	-	-	-	-
B32	-1	0	0	0	-	-	-	-
B33	-1	0	0	0	-	-	-	-
B34	-1	0	0	0	-	-	-	-
B35	-1	0	0	0	-	-	-	-
B36	-1	0	0	0	-	-	-	-
B37	-1	0	0	0	-	-	-	-
B38	-1	0	0	0	-	-	-	-
B39	-1	0	0	0	-	-	-	-
B41	-1	0	0	0	-	-	-	-
B42	-1	0	0	0	-	-	-	-
B43	-1	0	0	0	-	-	-	-
B44	-1	0	0	0	-	-	-	-
D48	-1	0	0	0	-	-	-	-
D49	-1	0	0	0	-	-	-	-
D50	-1	0	0	0	-	-	-	-
D51	-1	0	0	0	-	-	-	-
D52	-1	0	0	0	-	-	-	-
D53	-1	0	0	0	-	-	-	-
D54	-1	0	0	0	-	-	-	-
D55	-1	0	0	0	-	-	-	-
D56	-1	0	0	0	-	-	-	-
E57	-1	0	0	0	-	-	-	-
E58	-1	0	0	0	-	-	-	-
F59	-1	0	0	0	-	-	-	-
F60	-1	0	0	0	T	T	C	T
F61	-1	0	0	0	-	-	-	-
F62	-1	0	0	0	-	-	-	-
F63	-1	0	0	0	-	-	-	-
G64	-1	0	0	0	-	-	-	-
G65	-1	0	0	0	-	-	-	-
G66	-1	0	0	0	-	-	-	-
G67	-1	0	0	0	-	-	-	-
G68	-1	0	0	0	-	-	-	-
G69	-1	0	0	0	-	-	-	-
G70	-1	0	0	0	-	-	-	-
J74	-1	0	0	0	-	-	-	-
J76	-1	0	0	0	-	-	-	-
J77	-1	0	0	0	-	-	-	-
J78	-1	0	0	0	-	-	-	-
J79	-1	0	0	0	-	-	-	-
J80	-1	0	0	0	-	-	-	-
J81	-1	0	0	0	-	-	-	-
J82	-1	0	0	0	-	-	-	-
J83	-1	0	0	0	-	-	-	-
J84	-1	0	0	0	-	-	-	-
J85	-1	0	0	0	-	-	-	-
F86	-1	0	0	0	-	-	-	-
KU855474.1	-1	0	0	0	-	-	-	-
[truncated: 33 more columns]

## Sheet: Variable sites
Additional file 3
COEFFICIENT OF DIFFERENTIATION SHOWING VARIABLE SITES IN MULTIPLE ALIGNMENTS OF ARTOCARPUS ALTILIS AND ACCESSIONS OF TRECULIA AFRICANA var AFRICANA
Domain: Data Coding Codon Start: 1
										1	1	1	1	1	1	1	1	1	1	2	2	2	2	2	2	2	2	2	2	3	3	3	3	3	3	3	3	3	3	4	4	4	4	4	4	4	4	4	4
	1	2	3	4	5	6	7	8	9	0	1	2	3	4	5	6	7	8	9	0	1	2	3	4	5	6	7	8	9	0	1	2	3	4	5	6	7	8	9	0	1	2	3	4	5	6	7	8	9
Ab1	-	-	-	-	-	-	-	-	-	-	-	-	-	-	-	-	-	-	-	-	-	-	-	-	-	-	-	-	-	-	-	-	-	-	-	-	-	-	-	-	-	-	-	-	-	-	-	-	-
Ab2	-	-	-	-	-	-	-	-	-	-	-	-	-	-	-	-	-	-	-	-	-	-	-	-	-	-	-	-	-	-	-	-	-	-	-	-	-	-	T	T	T	A	A	C	A	A	R	G	T
Ab3	-	-	-	-	-	-	-	-	-	-	-	-	-	-	-	-	-	-	-	-	-	-	-	-	-	-	-	-	-	-	-	-	-	-	-	-	-	-	-	-	-	-	-	-	-	-	-	-	-
Ab4	-	-	-	-	-	-	-	-	-	-	-	-	-	-	-	-	-	-	-	-	-	-	-	-	-	-	-	-	-	-	-	-	-	-	-	-	-	-	-	-	-	-	-	-	-	-	-	-	-
Ab6	-	-	-	-	-	-	-	-	-	-	-	-	-	-	-	-	-	-	-	-	-	-	-	-	-	-	-	-	-	-	-	-	-	-	-	-	-	-	-	-	-	-	-	-	-	-	-	-	-
Ab7	-	-	-	-	-	-	-	-	-	-	-	-	-	-	-	-	-	-	-	-	-	-	-	-	-	-	-	-	-	-	-	-	-	-	-	-	-	T	W	W	T	A	A	Y	A	A	G	G	K
Ab8	-	-	-	-	-	-	-	-	-	-	-	-	-	-	-	-	-	-	-	-	-	-	-	-	-	-	-	-	-	-	-	-	-	-	-	-	-	-	-	-	-	-	-	-	-	-	-	-	-
Ab9	-	-	-	-	-	-	-	-	-	-	-	-	-	-	-	-	-	-	-	-	-	-	-	-	-	-	-	-	-	-	-	-	-	-	-	-	-	-	-	-	-	-	-	-	-	-	-	-	-
Ab10	-	-	-	-	-	-	-	-	-	-	-	-	-	-	-	-	-	-	-	-	-	-	-	-	-	-	-	-	-	-	-	-	-	-	-	-	-	-	T	T	M	T	W	C	W	A	A	R	W
Ab11	-	-	-	-	-	-	-	-	-	-	-	-	-	-	-	-	-	-	-	-	-	-	-	-	-	-	-	-	-	-	-	-	-	-	-	-	-	-	-	-	-	-	-	-	-	-	-	-	-
Ab12	-	-	-	-	-	-	-	-	-	-	-	-	-	-	-	-	-	-	-	-	-	-	-	-	-	-	-	-	-	-	-	-	-	-	-	-	-	-	-	T	M	T	W	C	A	A	G	G	T
Ab13	-	-	-	-	-	-	-	-	-	-	-	-	-	-	-	-	-	-	-	-	-	-	-	-	-	-	-	-	-	-	-	-	-	-	-	-	-	-	-	-	-	-	-	-	-	-	-	-	-
Ab14	-	-	-	-	-	-	-	-	-	-	-	-	-	-	-	-	-	-	-	-	-	-	-	-	-	-	-	-	-	-	-	-	-	-	-	-	-	-	-	-	-	-	-	-	-	A	G	S	T
G16	-	-	-	-	-	-	-	-	-	-	-	-	-	-	-	-	-	-	-	-	-	-	-	-	-	-	-	-	-	-	-	-	-	-	-	-	-	-	-	-	-	-	-	-	-	-	-	-	-
G17	-	-	-	-	-	-	-	-	-	-	-	-	-	-	-	-	-	-	-	-	-	-	-	-	-	-	-	-	-	-	-	-	-	-	-	-	-	-	T	T	T	A	A	C	A	A	G	G	T
Ab19	-	-	-	-	-	-	-	-	-	-	-	-	-	-	-	-	-	-	-	-	-	-	-	-	-	-	-	-	-	-	-	-	-	-	-	-	T	T	T	T	M	W	A	C	W	W	G	G	T
Ab20	-	-	-	-	-	-	-	-	-	-	-	-	-	-	-	-	-	-	-	-	-	-	-	-	-	-	-	-	-	-	-	-	-	-	-	-	-	-	C	T	C	A	A	C	A	A	G	G	T
Ab21	-	-	-	-	-	-	-	-	-	-	-	-	-	-	-	-	-	-	-	-	-	-	-	-	-	-	-	-	-	-	-	-	-	-	-	-	T	W	A	C	A	A	A	C	A	A	G	G	T
B22	-	-	-	-	-	-	-	-	-	-	-	-	-	-	-	-	-	-	-	-	-	-	-	-	-	-	-	-	-	-	-	-	-	-	-	-	-	-	-	-	-	-	-	-	-	-	-	-	-
B24	-	-	-	-	-	-	-	-	-	-	-	-	-	-	-	-	-	-	-	-	-	-	-	-	-	-	-	-	-	-	-	-	-	-	-	-	-	-	-	-	-	A	W	Y	A	A	G	G	T
B25	-	-	-	-	-	-	-	-	-	-	-	-	-	-	-	-	-	-	-	-	-	-	-	-	-	-	-	-	-	-	-	-	-	-	-	-	-	-	T	W	A	A	A	M	A	A	G	G	T
B26	-	-	-	-	-	-	-	-	-	-	-	-	-	-	-	-	-	-	-	-	-	-	-	-	-	-	-	-	-	-	-	-	-	-	-	-	-	T	A	T	A	A	A	C	A	A	G	G	T
B27	-	-	-	-	-	-	-	-	-	-	-	-	-	-	-	-	-	-	-	-	-	-	-	-	-	-	-	-	-	-	-	-	-	-	-	-	-	-	-	-	-	-	-	-	-	-	-	-	-
B28	-	-	-	-	-	-	-	-	-	-	-	-	-	-	-	-	-	-	-	-	-	-	-	-	-	-	-	-	-	-	-	-	-	-	-	-	-	T	T	T	T	W	W	C	A	A	G	G	T
B29	-	-	-	-	-	-	-	-	-	-	-	-	-	-	-	-	-	-	-	-	-	-	-	-	-	-	-	-	-	-	-	-	-	-	-	-	-	-	-	-	-	-	-	-	-	-	-	-	-
B30	-	-	-	-	-	-	-	-	-	-	-	-	-	-	-	-	-	-	-	-	-	-	-	-	-	-	-	-	-	-	-	-	-	-	-	-	-	-	T	W	T	A	T	A	A	A	A	R	T
B32	-	-	-	-	-	-	-	-	-	-	-	-	-	-	-	-	-	-	-	-	-	-	-	-	-	-	-	-	-	-	-	-	-	-	-	-	-	-	-	-	-	-	-	-	-	-	-	-	-
B33	-	-	-	-	-	-	-	-	-	-	-	-	-	-	-	-	-	-	-	-	-	-	-	-	-	-	-	-	-	-	-	-	-	-	-	-	-	-	-	-	-	-	A	C	A	A	G	G	T
B34	-	-	-	-	-	-	-	-	-	-	-	-	-	-	-	-	-	-	-	-	-	-	-	-	-	-	-	-	-	-	-	-	-	-	-	-	-	-	-	-	-	-	-	C	A	A	G	G	Y
B35	-	-	-	-	-	-	-	-	-	-	-	-	-	-	-	-	-	-	-	-	-	-	-	-	-	-	-	-	-	-	-	-	-	-	-	-	-	-	-	-	-	-	-	-	-	-	-	-	-
B36	-	-	-	-	-	-	-	-	-	-	-	-	-	-	-	-	-	-	-	-	-	-	-	-	-	-	-	-	-	-	-	-	-	-	-	-	-	-	-	-	T	A	A	C	A	A	G	T	T
B37	-	-	-	-	-	-	-	-	-	-	-	-	-	-	-	-	-	-	-	-	-	-	-	-	-	-	-	-	-	-	-	-	-	-	-	-	-	-	T	T	T	A	W	Y	T	A	G	G	T
B38	-	-	-	-	-	-	-	-	-	-	-	-	-	-	-	-	-	-	-	-	-	-	-	-	-	-	-	-	-	-	-	-	-	-	-	-	-	-	-	T	T	A	T	C	A	A	R	R	T
B39	-	-	-	-	-	-	-	-	-	-	-	-	-	-	-	-	-	-	-	-	-	-	-	-	-	-	-	-	-	-	-	-	-	-	-	-	-	-	-	-	-	-	-	-	-	-	-	-	-
B41	-	-	-	-	-	-	-	-	-	-	-	-	-	-	-	-	-	-	-	-	-	-	-	-	-	-	-	-	-	-	-	-	-	-	-	-	-	-	-	-	-	-	-	-	-	-	-	-	-
B42	-	-	-	-	-	-	-	-	-	-	-	-	-	-	-	-	-	-	-	-	-	-	-	-	-	-	-	-	-	-	-	-	-	-	-	-	-	-	-	T	T	A	A	C	A	A	G	G	T
B43	-	-	-	-	-	-	-	-	-	-	-	-	-	-	-	-	-	-	-	-	-	-	-	-	-	-	-	-	-	-	-	-	-	-	-	-	-	-	-	-	-	-	-	-	-	-	-	-	-
B44	-	-	-	-	-	-	-	-	-	-	-	-	-	-	-	-	-	-	-	-	-	-	-	-	-	-	-	-	-	-	-	-	-	-	-	-	-	-	-	-	T	A	A	C	A	A	G	G	T
D48	-	-	-	-	-	-	-	-	-	-	-	-	-	-	-	-	-	-	-	-	-	-	-	-	-	-	-	-	-	-	-	-	-	-	-	-	-	-	-	-	-	A	A	C	A	A	G	G	T
D49	-	-	-	-	-	-	-	-	-	-	-	-	-	-	-	-	-	-	-	-	-	-	-	-	-	-	-	-	-	-	-	-	-	-	-	-	G	G	G	G	T	A	A	C	A	A	G	G	T
D50	-	-	-	-	-	-	-	-	-	-	-	-	-	-	-	-	-	-	-	-	-	-	-	-	-	-	-	-	-	-	-	-	-	-	-	-	-	-	-	-	T	A	A	C	W	A	G	G	T
D51	-	-	-	-	-	-	-	-	-	-	-	-	-	-	-	-	-	-	-	-	-	-	-	-	-	-	-	-	-	-	-	-	-	-	-	-	-	-	-	-	-	-	-	-	-	-	-	-	-
D52	-	-	-	-	-	-	-	-	-	-	-	-	-	-	-	-	-	-	-	-	-	-	-	-	-	-	-	-	-	-	-	-	-	-	-	-	-	-	-	-	T	A	A	C	A	A	G	G	T
D53	-	-	-	-	-	-	-	-	-	-	-	-	-	-	-	-	-	-	-	-	-	-	-	-	-	-	-	-	-	-	-	-	-	-	-	-	-	-	-	-	-	-	A	C	A	A	G	G	T
D54	-	-	-	-	-	-	-	-	-	-	-	-	-	-	-	-	-	-	-	-	-	-	-	-	-	-	-	-	-	-	-	-	-	-	-	-	-	-	-	-	-	-	A	C	A	A	G	G	T
D55	-	-	-	-	-	-	-	-	-	-	-	-	-	-	-	-	-	-	-	-	-	-	-	-	-	-	-	-	-	-	-	-	-	-	-	-	-	-	-	-	-	-	-	-	-	-	-	-	-
D56	-	-	-	-	-	-	-	-	-	-	-	-	-	-	-	-	-	-	-	-	-	-	-	-	-	-	-	-	-	-	-	-	-	-	-	G	C	T	A	A	C	A	A	S	G	K	T	T	T
E57	-	-	-	-	-	-	-	-	-	-	-	-	-	-	-	-	-	-	-	-	-	-	-	-	-	-	-	-	-	-	-	-	-	-	-	-	-	-	-	-	-	-	A	Y	A	A	G	G	T
E58	-	-	-	-	-	-	-	-	-	-	-	-	-	-	-	-	-	-	-	-	-	-	-	-	-	-	-	-	-	-	-	-	-	-	-	-	-	-	-	-	T	A	W	Y	A	A	G	G	T
F59	-	-	-	-	-	-	-	-	-	-	-	-	-	-	-	-	-	-	-	-	-	-	-	-	-	-	-	-	-	-	-	-	-	-	-	-	-	-	-	-	-	A	A	C	A	A	G	G	T
F60	-	-	-	-	-	T	T	W	M	T	T	A	C	W	T	T	W	Y	C	T	T	G	G	T	T	K	S	C	K	T	A	G	C	G	G	A	S	G	S	A	K	S	G	A	T	A	G	R	T
F61	-	-	-	-	-	-	-	-	-	-	-	-	-	-	-	-	-	-	-	-	-	-	-	-	-	-	-	-	-	-	-	-	-	-	-	-	-	-	-	-	T	A	W	C	A	A	G	G	T
F62	-	-	-	-	-	-	-	-	-	-	-	-	-	-	-	-	-	-	-	-	-	-	-	-	-	-	-	-	-	-	-	-	-	-	-	-	-	-	-	-	-	A	A	C	A	A	G	G	T
F63	-	-	-	-	-	-	-	-	-	-	-	-	-	-	-	-	-	-	-	-	-	-	-	-	-	-	-	-	-	-	-	-	-	-	-	-	-	-	-	-	-	-	-	-	-	-	-	-	-
G64	-	-	-	-	-	-	-	-	-	-	-	-	-	-	-	-	-	-	-	-	-	-	-	-	-	-	-	-	-	-	-	-	-	-	-	-	-	-	-	-	T	A	A	C	A	A	G	G	T
G65	-	-	-	-	-	-	-	-	-	-	-	-	-	-	-	-	-	-	-	-	-	-	-	-	-	-	-	-	-	-	-	-	-	-	-	-	-	-	-	-	-	A	A	C	A	A	G	G	T
G66	-	-	-	-	-	-	-	-	-	-	-	-	-	-	-	-	-	-	-	-	-	-	-	-	-	-	-	-	-	-	-	-	-	-	-	-	-	-	-	-	T	A	W	C	A	A	G	G	T
G67	-	-	-	-	-	-	-	-	-	-	-	-	-	-	-	-	-	-	-	-	-	-	-	-	-	-	-	-	-	-	-	A	W	G	G	G	T	Y	T	T	A	A	C	A	A	G	G	T	T
G68	-	-	-	-	-	-	-	-	-	-	-	-	-	-	-	-	-	-	-	-	-	-	-	-	-	-	-	-	-	-	-	-	-	-	-	-	-	-	-	-	-	A	A	C	A	A	G	G	T
G69	-	-	-	-	-	-	-	-	-	-	-	-	-	-	-	-	-	-	-	-	-	-	-	-	-	-	-	-	-	-	-	-	-	-	-	-	-	-	-	T	C	W	A	C	A	A	G	G	T
G70	-	-	-	-	-	-	-	-	-	-	-	-	-	-	-	-	-	-	-	-	-	-	-	-	-	-	-	-	-	-	-	-	-	-	-	-	-	-	A	A	C	A	A	G	G	T	T	T	C
J74	-	-	-	-	-	-	-	-	-	-	-	-	-	-	-	-	-	-	-	-	-	-	-	-	-	-	T	A	T	M	A	A	R	R	A	K	T	T	T	R	T	A	A	C	A	G	G	G	T
J76	-	-	-	-	-	-	-	-	-	-	-	-	-	-	-	-	-	-	-	-	-	-	-	-	-	-	-	-	-	-	-	-	-	-	-	-	-	-	-	-	-	A	A	C	A	A	G	G	T
J77	-	-	-	-	-	-	-	-	-	-	-	-	-	-	-	-	-	-	-	-	-	-	-	-	-	-	-	-	-	-	-	-	-	-	-	-	-	-	-	-	-	A	A	C	A	A	G	G	T
J78	-	-	-	-	-	-	-	-	-	-	-	-	-	-	-	-	-	-	-	-	-	-	-	-	-	-	-	-	-	-	-	-	-	-	-	-	-	-	-	T	T	A	A	C	A	A	G	G	T
J79	-	-	-	-	-	-	-	-	-	-	-	-	-	-	-	-	-	-	-	-	-	-	-	-	-	-	-	-	-	-	-	-	-	-	-	-	-	-	-	T	T	T	A	M	A	A	R	G	T
J80	-	-	-	-	-	-	-	-	-	-	-	-	-	-	-	-	-	-	-	-	-	-	-	-	-	-	-	-	-	-	-	-	-	-	-	-	-	T	T	T	T	W	A	C	A	A	G	G	T
J81	T	A	A	C	W	A	A	R	C	A	A	G	G	T	T	T	G	G	G	T	A	G	C	T	G	A	M	C	S	T	A	G	G	G	A	A	G	G	A	T	C	A	G	A	G	T	S	G	A
J82	-	-	-	-	-	-	-	-	-	-	-	-	-	-	-	-	-	-	-	-	-	-	-	-	-	-	-	-	-	-	-	-	-	-	-	-	-	-	-	T	T	A	A	C	A	A	G	G	T
J83	-	-	-	-	-	-	-	-	-	-	-	-	-	-	-	-	-	-	-	-	-	-	-	-	-	-	-	-	-	-	-	-	-	-	-	-	-	-	-	-	-	A	W	C	A	A	G	G	T
J84	-	-	-	-	-	-	-	-	-	-	-	-	-	-	-	-	-	-	-	-	-	-	-	-	-	-	-	-	-	-	-	-	-	-	-	-	-	-	-	-	-	-	A	C	A	A	G	G	T
J85	-	-	-	-	-	-	-	-	-	-	-	-	-	-	-	-	-	-	-	-	-	-	-	-	-	-	-	-	-	-	-	-	-	-	-	-	-	-	-	-	T	A	W	C	A	A	G	G	T
F86	-	-	-	-	-	-	-	-	-	-	-	-	-	-	-	-	-	-	-	-	-	-	-	-	-	-	-	-	-	-	-	-	-	-	-	-	-	-	-	-	T	W	A	C	A	A	G	G	T
KU855474.1	-	-	-	-	-	-	-	-	-	-	-	-	-	-	-	-	-	-	-	-	-	-	-	-	-	-	-	-	-	-	-	-	-	-	-	-	-	-	-	-	-	-	-	-	-	-	-	-	-
																						1	1	1	1	1	1	1	1	1	1	1	1	1	1	1	1	1	1	1	1	1	1	1	1	1	1	1	1
	7	8	8	8	8	8	8	8	8	8	8	9	9	9	9	9	9	9	9	9	9	0	0	0	0	0	0	0	0	0	0	1	1	1	1	1	1	1	1	1	1	2	2	2	2	2	2	2	2
	9	0	1	2	3	4	5	6	7	8	9	0	1	2	3	4	5	6	7	8	9	0	1	2	3	4	5	6	7	8	9	0	1	2	3	4	5	6	7	8	9	0	1	2	3	4	5	6	7
Ab1	T	C	C	G	T	A	G	G	T	G	A	A	C	C	T	G	C	G	G	A	-	-	-	-	-	-	-	A	G	G	A	T	C	A	T	T	A	C	C	G	A	G	T	G	T	T	T	-	-
Ab2	.	.	.	.	.	.	.	.	.	.	.	.	.	.	.	.	.	.	A	.	-	-	-	-	-	-	-	.	.	.	.	.	.	.	.	.	.	.	.	.	.	.	.	.	-	.	.	T	-
Ab3	.	.	.	.	.	.	.	.	.	.	.	.	.	.	.	.	.	.	.	.	-	-	-	-	-	-	-	.	.	A	.	.	.	.	.	.	G	.	A	.	.	.	A	.	.	.	.	-	-
Ab4	.	.	.	.	.	.	A	.	G	.	.	.	.	.	.	.	.	.	.	.	-	-	-	-	-	-	A	.	.	-	.	A	.	.	A	.	.	.	.	.	.	A	.	.	-	S	-	-	-
Ab6	.	T	G	.	.	.	.	.	.	.	G	.	A	G	G	A	T	C	A	.	-	-	-	-	-	-	-	-	.	.	.	.	.	.	.	.	G	G	G	C	.	.	.	.	.	.	.	-	-
Ab7	.	G	.	.	.	.	.	.	G	.	.	.	.	.	.	.	.	.	.	.	-	-	-	-	-	-	-	.	.	.	.	.	.	.	.	.	.	.	.	.	.	.	.	.	.	.	.	T	-
Ab8	-	-	-	-	-	-	-	-	-	-	-	-	-	-	-	-	-	-	-	-	-	-	-	-	-	-	-	-	-	-	-	-	-	-	-	-	-	-	-	-	-	-	-	-	-	-	-	-	-
Ab9	-	-	-	-	-	-	-	-	-	-	-	-	-	-	-	-	-	-	-	-	-	-	-	-	-	-	-	-	-	-	-	-	-	-	-	-	-	-	-	-	-	-	-	-	-	-	-	-	-
Ab10	A	T	.	A	.	T	A	C	C	.	.	G	T	G	.	T	T	.	.	.	C	T	G	C	G	G	A	.	.	.	.	.	.	.	.	.	.	.	.	.	.	.	.	.	-	.	.	T	-
Ab11	-	T	T	A	.	T	M	T	.	A	.	.	T	T	C	A	S	C	.	G	-	-	-	-	-	-	-	-	.	T	.	.	.	C	C	.	.	.	M	T	G	A	.	C	-	-	-	C	G
Ab12	A	T	.	A	.	T	A	C	C	.	.	G	T	G	.	T	T	.	.	.	T	G	G	-	-	G	A	.	.	.	.	.	.	.	.	.	.	.	.	.	.	.	.	.	-	.	.	T	-
Ab13	-	T	T	T	.	K	C	T	.	A	.	.	T	T	.	A	K	S	.	G	-	-	-	-	-	-	-	-	.	T	.	.	A	C	C	C	.	.	.	.	G	.	.	T	-	-	-	C	C
Ab14	.	A	T	.	.	T	T	S	C	.	G	T	G	G	C	C	.	.	.	.	T	C	-	-	-	-	-	.	T	.	.	Y	T	G	A	G	T	S	.	.	G	.	C	C	C	.	.	T	-
G16	-	-	-	-	-	-	-	-	-	-	-	-	-	-	-	-	-	-	-	-	-	-	-	-	-	-	-	-	-	-	-	-	-	-	-	-	-	-	-	-	-	-	-	-	-	-	-	-	-
G17	.	.	T	.	.	.	.	.	.	.	T	T	.	.	.	.	.	.	.	.	-	-	-	-	-	-	-	.	.	.	.	.	.	.	.	G	.	A	G	.	.	.	.	T	-	.	.	T	-
Ab19	.	.	.	.	.	.	.	.	.	.	.	.	.	.	.	.	.	.	.	.	-	-	-	-	-	-	-	.	.	.	.	.	.	.	.	.	.	.	.	.	.	.	.	.	-	.	.	T	-
Ab20	.	Y	M	.	.	.	.	.	.	.	.	M	.	.	.	.	.	.	.	.	-	-	-	-	-	-	-	.	.	R	.	.	.	.	.	.	.	.	.	.	.	.	.	.	-	.	.	T	-
Ab21	.	.	G	.	.	.	.	.	.	.	.	.	.	T	.	.	.	.	.	.	-	-	-	-	-	-	-	.	.	.	.	.	.	.	.	.	.	.	.	.	.	.	.	.	-	.	.	T	-
B22	.	T	T	C	.	.	.	A	G	.	.	.	.	.	C	C	T	.	.	.	-	-	-	-	-	-	-	.	A	.	G	.	A	.	.	A	T	T	.	S	.	.	W	.	.	.	.	T	G
B24	.	.	.	.	.	.	.	.	.	.	.	.	.	.	.	.	.	.	.	.	-	-	-	-	-	-	A	G	.	-	.	.	.	.	.	.	.	.	.	.	.	.	.	.	-	.	.	T	-
B25	.	.	T	.	.	.	.	.	.	.	.	.	.	.	.	.	.	.	.	.	-	-	-	-	-	-	-	.	.	.	.	.	.	.	.	.	.	.	.	.	.	.	.	.	-	.	.	T	-
B26	.	.	G	.	.	.	.	.	.	.	.	.	.	.	.	.	.	.	.	.	-	-	-	-	-	-	-	.	.	.	.	.	.	.	.	.	.	.	.	.	.	.	.	.	-	.	.	T	-
B27	-	-	-	-	-	-	-	-	-	-	-	-	-	-	-	-	-	-	-	-	-	-	-	-	-	-	-	-	-	-	-	-	-	-	-	-	-	-	-	-	-	-	-	-	-	-	-	-	-
B28	.	.	.	.	.	.	.	.	.	.	.	.	.	.	.	.	.	.	.	.	-	-	-	-	-	-	-	.	.	.	.	.	.	.	.	.	.	.	.	.	.	.	.	.	G	.	.	T	-
B29	-	-	-	-	-	-	-	-	-	-	-	-	-	-	-	-	-	-	-	-	-	-	-	-	-	-	-	-	-	-	-	-	-	-	-	-	-	-	-	-	-	-	-	-	-	-	-	-	-
B30	.	T	T	.	.	.	.	.	G	.	.	.	.	.	C	.	.	.	.	.	-	-	-	-	-	-	-	.	A	.	.	.	.	.	.	.	T	.	.	.	.	.	A	.	.	K	.	-	-
B32	A	G	G	A	.	C	A	T	.	A	C	-	-	-	.	.	.	.	.	.	-	-	-	-	-	-	A	G	.	-	.	.	.	.	.	.	.	.	.	.	.	.	.	.	-	.	.	T	-
B33	-	.	.	.	.	.	.	.	.	.	.	.	.	.	.	.	.	.	.	.	-	-	-	-	-	-	A	G	.	-	.	.	.	.	.	.	.	.	.	.	.	.	.	.	-	.	.	T	-
B34	.	-	-	.	.	.	.	T	A	.	.	.	.	G	G	.	.	.	.	.	-	-	-	-	-	-	-	G	.	A	G	G	.	.	.	.	C	.	T	.	.	.	G	.	A	.	.	G	-
B35	G	A	A	.	.	.	T	T	A	A	.	.	.	.	.	T	.	.	.	.	-	-	-	-	-	-	-	.	.	T	.	.	.	.	A	.	C	.	.	.	.	.	G	.	A	G	.	G	G
B36	.	A	A	.	.	.	.	.	.	.	.	.	.	.	.	.	G	.	.	.	-	-	-	-	-	-	-	.	.	.	.	.	.	.	.	A	.	.	.	.	.	.	.	.	-	.	.	T	-
B37	.	.	.	.	.	.	.	.	.	.	.	.	.	.	.	.	.	.	.	.	-	-	-	-	-	-	A	G	.	-	.	.	.	.	.	.	.	.	.	.	.	.	.	.	-	.	.	T	-
B38	.	T	T	T	.	.	.	.	.	.	.	.	.	.	.	.	.	.	.	.	-	-	-	-	-	-	-	.	.	.	.	A	.	.	.	.	C	.	.	.	.	.	A	.	-	.	.	K	-
B39	.	.	.	.	.	.	.	.	.	.	.	.	.	.	.	.	.	.	.	.	-	-	-	-	-	-	A	G	.	-	.	.	.	.	.	.	T	.	.	.	.	.	.	.	-	C	-	-	-
B41	.	.	.	.	.	.	.	.	.	T	.	.	.	.	.	.	.	.	.	.	-	-	-	-	-	-	-	.	.	.	.	.	.	.	.	.	.	.	.	.	.	.	.	.	-	.	.	T	-
B42	-	.	.	.	.	.	.	.	.	.	.	.	.	.	.	.	.	.	.	.	-	-	-	-	-	-	A	G	.	-	.	.	.	.	.	.	.	.	.	.	.	.	.	.	-	.	.	K	-
B43	-	-	-	-	-	-	-	-	-	-	-	-	-	-	-	-	-	-	-	-	-	-	-	-	-	-	-	-	-	-	-	-	-	-	-	-	-	-	-	-	-	-	-	-	-	-	-	-	-
B44	-	.	.	.	.	.	.	.	.	.	.	.	.	.	.	.	.	.	.	.	-	-	-	-	-	-	A	G	.	-	.	.	.	.	.	.	.	.	.	.	.	.	.	.	-	.	.	T	-
D48	-	.	.	.	.	.	.	.	.	.	.	.	.	.	.	.	.	.	.	.	-	-	-	-	-	-	A	G	.	-	.	.	.	.	.	.	M	.	.	.	.	.	.	.	-	.	.	T	-
D49	.	.	.	.	.	.	.	.	.	.	.	.	.	.	.	.	.	.	.	.	-	-	-	-	-	-	A	G	.	-	.	.	.	.	.	.	.	.	.	.	.	.	.	T	-	C	-	-	-
D50	.	.	.	.	.	.	.	.	.	.	.	.	.	.	.	.	.	.	.	.	-	-	-	-	-	-	A	G	.	-	.	.	.	.	.	.	.	.	.	.	.	.	.	.	-	C	-	-	-
D51	-	-	-	-	-	-	-	-	-	-	-	-	-	-	-	-	-	-	-	-	-	-	-	-	-	-	-	-	-	-	-	-	-	-	-	-	-	-	-	-	-	-	-	-	-	-	-	-	-
D52	.	.	.	.	.	.	.	.	.	.	.	.	.	.	.	.	.	.	.	.	-	-	-	-	-	-	A	G	.	-	.	.	.	.	.	.	.	.	.	.	.	.	.	.	-	C	-	-	-
D53	.	.	G	.	.	.	.	.	.	.	.	.	.	.	.	.	.	.	.	.	-	-	-	-	-	-	A	G	.	-	.	.	.	.	.	.	.	.	.	.	.	.	.	.	-	.	.	T	-
D54	.	.	G	.	.	.	.	.	.	.	.	.	.	.	.	.	.	.	.	.	-	-	-	-	-	-	A	G	.	-	.	.	.	.	.	.	.	.	.	.	.	.	.	.	-	.	.	T	-
D55	A	R	.	.	G	G	C	T	.	A	.	.	T	T	C	A	G	C	.	G	-	-	-	-	-	-	-	-	.	T	.	.	.	C	C	.	C	.	.	T	G	A	.	C	-	-	-	C	G
D56	.	.	G	.	.	.	.	.	G	.	.	.	.	.	.	.	.	.	.	.	-	-	-	-	-	-	A	G	.	-	.	.	.	T	.	.	.	.	.	.	.	C	C	.	-	C	-	-	-
E57	.	.	.	.	.	.	.	.	.	.	.	.	.	.	.	.	.	.	.	.	-	-	-	-	-	-	A	G	.	-	.	.	.	.	.	.	.	.	.	.	.	.	.	.	-	C	-	-	-
E58	.	.	.	.	.	.	.	.	.	.	.	.	.	.	.	.	.	.	.	.	-	-	-	-	-	-	A	G	.	-	.	.	.	.	.	.	.	.	.	.	.	.	.	.	-	C	-	-	-
F59	.	.	.	.	.	.	.	.	.	.	.	.	.	.	.	.	.	.	.	.	-	-	-	-	-	-	A	.	A	C	.	A	G	G	.	.	T	.	.	.	T	A	G	.	-	.	-	-	-
F60	.	.	.	.	.	.	.	.	.	.	.	.	.	.	.	.	.	.	.	.	-	-	-	-	-	-	A	G	.	-	.	.	.	.	.	.	.	.	.	.	.	.	.	.	-	C	-	-	-
F61	.	.	.	.	.	.	.	.	.	.	.	.	.	.	.	.	.	.	.	.	-	-	-	-	-	-	A	G	.	-	.	.	.	.	.	.	.	.	.	.	.	.	.	.	-	C	-	-	-
F62	-	A	G	.	A	.	.	.	.	.	.	G	T	.	.	.	.	.	.	.	-	-	-	-	-	-	-	.	.	.	.	.	.	.	.	.	.	.	.	.	.	.	.	.	-	-	-	-	C
F63	.	.	.	.	.	.	.	.	.	.	.	.	.	.	.	.	.	.	.	.	-	-	-	-	-	-	A	G	.	-	.	.	.	.	.	.	.	.	.	.	.	.	.	.	-	C	-	-	-
G64	.	.	.	.	.	.	.	.	.	.	.	.	.	.	.	.	.	.	.	.	-	-	-	-	-	-	A	G	.	-	.	.	.	.	.	.	.	.	.	.	.	.	.	.	-	C	-	-	-
G65	-	.	.	.	.	.	.	.	.	.	.	.	.	.	.	.	.	.	.	.	-	-	-	-	-	-	-	.	.	.	.	.	.	.	.	.	.	.	.	.	.	.	.	.	-	.	.	T	-
G66	A	G	G	A	.	C	.	.	.	.	.	.	.	.	.	.	.	.	.	.	-	-	-	-	-	-	A	G	.	-	.	.	.	.	.	.	.	.	.	.	.	.	.	.	-	.	.	T	-
G67	.	A	T	C	G	.	.	.	G	.	.	.	.	.	.	C	.	.	.	.	-	-	-	-	-	-	A	G	.	-	.	.	.	.	.	.	.	T	.	.	.	.	.	.	-	C	-	-	-
G68	A	G	G	A	.	.	.	.	.	.	.	.	.	.	.	.	.	.	.	.	-	-	-	-	-	-	A	G	.	-	.	.	.	.	.	.	.	.	.	.	.	.	.	.	-	C	-	-	-
G69	.	.	.	.	.	.	.	.	.	.	.	.	.	.	.	.	.	.	.	.	-	-	-	-	-	-	A	G	.	-	.	.	.	.	.	.	.	.	.	.	.	.	.	.	-	.	.	T	-
G70	.	.	Y	.	.	.	.	.	.	.	.	R	.	.	.	.	.	.	.	.	-	-	-	-	-	-	A	G	.	-	.	.	.	.	.	.	.	.	Y	.	.	.	.	.	-	C	-	-	-
J74	.	.	.	.	.	.	.	.	.	.	.	.	.	.	.	.	.	.	.	.	-	-	-	-	-	-	A	G	.	-	.	.	.	.	.	.	.	.	.	.	.	.	.	.	-	C	-	-	-
J76	.	.	.	.	.	.	.	.	.	.	.	.	.	.	.	.	.	.	.	.	-	-	-	-	-	-	A	G	.	-	.	.	.	.	.	.	.	.	.	.	.	.	.	.	-	C	-	-	-
J77	.	.	.	.	.	.	.	.	.	.	.	.	.	.	.	.	.	.	.	.	-	-	-	-	-	-	A	G	.	-	.	.	.	.	.	.	.	.	.	.	.	.	.	.	-	C	-	-	-
J78	.	.	.	.	.	.	.	.	.	.	.	G	.	T	.	.	.	.	.	.	-	-	-	-	-	-	-	.	.	.	.	.	.	.	.	.	.	.	.	.	.	.	.	.	-	.	.	T	-
J79	.	.	.	.	.	.	.	.	.	.	.	.	.	.	.	.	T	.	.	.	-	-	-	-	-	-	-	.	.	.	.	.	.	.	.	.	.	.	.	.	.	.	.	.	-	.	.	T	-
J80	.	.	.	.	.	.	.	.	.	.	.	.	.	.	.	.	.	.	.	.	-	-	-	-	-	-	A	G	.	-	.	.	.	.	.	.	.	.	.	.	.	.	.	.	-	C	-	-	-
J81	.	G	G	.	.	.	.	C	.	.	.	.	.	G	.	A	G	.	.	.	-	-	-	-	-	-	-	.	.	.	.	.	.	.	G	A	G	T	G	.	.	.	.	.	-	.	.	T	-
J82	-	.	.	.	.	.	.	.	.	.	.	.	.	.	.	.	.	.	.	.	-	-	-	-	-	-	A	G	.	-	.	.	.	.	.	.	.	.	.	.	.	.	.	.	-	.	.	T	-
J83	-	.	.	.	.	.	.	.	.	.	.	.	.	.	.	.	.	.	.	.	-	-	-	-	-	-	A	G	.	-	.	.	.	.	.	.	.	.	.	.	.	.	.	.	-	.	.	T	-
J84	-	.	.	.	.	.	.	.	.	.	.	.	.	.	.	.	.	.	.	.	-	-	-	-	-	-	A	G	.	-	.	.	.	.	.	.	.	.	.	.	.	.	.	.	-	.	.	T	-
J85	A	G	G	A	.	C	A	T	.	A	-	-	-	-	.	.	.	.	.	.	-	-	-	-	-	-	A	G	.	-	.	.	.	.	.	.	.	.	.	.	.	.	.	.	-	.	.	T	-
F86	-	.	.	.	.	.	.	.	.	.	.	.	.	.	.	.	.	.	.	.	-	-	-	-	-	-	A	G	.	-	.	.	.	.	.	.	.	.	.	.	.	.	.	.	-	.	.	T	-
KU855474.1	C	.	.	A	C	.	.	A	A	A	G	.	.	.	C	.	.	.	A	.	C	A	-	-	-	-	G	G	T	T	.	C	A	.	C	G	T	T	T	.	G	.	G	.	G	C	G	A	G
	1	1	1	1	1	1	1	1	1	1	1	1	1	1	1	1	1	1	1	1	1	1	1	1	1	1	1	1	1	1	1	1	1	1	1	1	1	1	1	1	1	1	1	2	2	2	2	2	2
	5	5	5	6	6	6	6	6	6	6	6	6	6	7	7	7	7	7	7	7	7	7	7	8	8	8	8	8	8	8	8	8	8	9	9	9	9	9	9	9	9	9	9	0	0	0	0	0	0
	7	8	9	0	1	2	3	4	5	6	7	8	9	0	1	2	3	4	5	6	7	8	9	0	1	2	3	4	5	6	7	8	9	0	1	2	3	4	5	6	7	8	9	0	1	2	3	4	5
Ab1	-	-	-	S	T	Y	C	T	C	C	C	A	T	C	S	G	M	R	-	T	S	T	A	T	T	T	G	T	A	C	-	-	C	M	T	G	K	K	K	C	-	T	T	S	-	-	-	-	-
Ab2	-	-	-	G	.	C	.	.	.	.	.	.	Y	.	C	.	T	G	-	.	Y	.	.	.	.	.	.	.	.	.	-	-	.	C	.	.	T	T	G	.	-	.	.	C	-	-	-	-	-
Ab3	-	-	-	G	.	S	.	K	M	M	Y	.	Y	.	G	.	T	G	-	Y	C	.	.	.	.	.	.	.	.	.	-	-	.	C	.	.	.	T	G	S	-	.	.	M	-	-	-	-	-
Ab4	-	-	-	-	-	-	-	-	Y	.	.	.	W	.	C	.	T	G	-	W	Y	.	-	Y	.	.	.	.	.	.	-	-	.	C	.	.	T	T	G	.	-	.	.	C	-	-	-	-	-
Ab6	-	-	-	A	.	C	Y	.	A	T	.	.	C	.	T	.	G	T	G	K	M	W	M	W	K	K	.	G	G	.	T	T	.	C	C	.	T	T	G	G	-	-	.	T	-	-	-	-	-
Ab7	-	-	-	G	.	C	.	.	M	.	.	M	.	M	C	.	T	Y	-	.	K	.	.	.	.	W	.	.	W	.	-	-	.	C	.	.	S	T	G	S	-	.	.	W	-	-	-	-	-
Ab8	-	-	-	G	.	C	.	.	.	.	.	.	.	.	C	.	T	G	-	.	C	.	.	.	.	.	.	.	.	.	-	-	.	C	.	S	T	T	G	S	C	.	K	C	-	-	-	-	-
Ab9	-	-	-	G	.	C	.	.	.	.	.	.	.	.	C	.	T	G	-	.	C	.	.	.	.	.	.	.	.	.	-	-	.	C	.	.	T	T	G	.	-	.	.	C	-	-	-	-	-
Ab10	-	-	-	G	.	C	.	.	.	.	.	.	.	.	C	.	T	G	-	.	C	.	.	.	.	.	.	.	.	.	-	-	.	C	.	.	T	T	G	.	-	.	.	C	-	-	-	-	-
Ab11	-	-	-	-	-	-	-	-	-	-	-	.	A	A	G	.	T	T	-	G	G	G	G	.	.	G	.	G	-	-	-	-	-	-	-	-	-	-	-	-	-	-	-	-	-	-	-	-	-
Ab12	-	-	-	G	.	C	.	.	.	.	.	.	.	.	C	.	T	G	-	.	C	.	.	.	.	.	.	.	.	.	-	-	.	C	.	.	T	T	G	.	-	.	.	C	-	-	-	-	-
Ab13	-	-	T	T	.	A	A	A	A	A	A	.	C	A	G	.	T	T	-	.	.	G	G	.	C	A	A	G	.	.	C	C	Y	C	A	.	C	A	G	.	G	.	.	T	T	A	A	A	A
Ab14	-	-	-	-	-	-	.	.	.	T	A	C	A	A	C	.	T	G	-	.	T	.	G	.	.	.	.	.	G	R	A	-	.	.	.	S	C	.	.	G	G	S	.	A	T	C	C	T	W
G16	T	C	C	G	.	C	.	.	.	.	.	.	.	.	C	.	A	G	-	.	C	.	.	.	.	.	.	.	.	.	-	-	.	C	.	.	T	T	G	.	-	.	.	C	-	-	-	-	-
G17	-	-	-	G	.	C	.	.	.	.	Y	.	.	Y	.	.	W	S	-	Y	C	.	R	.	.	.	.	.	K	.	-	-	.	C	.	K	T	T	G	S	-	.	.	C	-	-	-	-	-
Ab19	-	-	-	G	.	C	.	.	.	.	.	.	.	.	C	.	T	G	-	.	C	.	.	.	.	.	.	.	.	.	-	-	.	C	.	.	T	T	G	.	-	.	.	C	-	-	-	-	-
Ab20	-	-	-	G	.	C	.	.	.	.	.	.	.	.	C	.	T	G	-	.	C	.	.	.	.	.	.	.	.	.	-	-	.	C	.	.	T	T	G	.	-	.	.	M	-	-	-	-	-
Ab21	-	-	-	G	.	C	.	.	.	.	.	.	.	.	C	.	T	G	-	.	T	.	.	.	.	Y	.	.	.	S	-	-	M	.	Y	R	T	W	S	.	-	.	W	M	-	-	-	-	-
B22	-	-	-	.	.	C	.	Y	.	.	.	.	.	S	Y	.	T	G	-	.	M	.	W	.	.	.	.	.	M	.	-	-	.	S	.	.	T	T	G	Y	-	.	.	Y	-	-	-	-	-
B24	-	-	-	G	.	C	.	.	.	.	.	.	.	.	C	.	T	G	-	.	C	.	.	.	.	.	.	.	.	.	-	-	.	C	.	.	T	T	G	.	-	.	.	C	-	-	-	-	-
B25	-	-	-	G	.	C	.	.	.	.	.	.	.	.	C	.	T	G	-	.	C	.	.	.	.	.	.	.	.	.	-	-	.	C	.	.	T	T	G	Y	-	.	.	C	-	-	-	-	-
B26	-	-	-	G	.	C	.	.	.	.	.	.	.	.	C	.	T	G	-	.	C	.	.	.	.	.	.	.	.	.	-	-	.	C	.	.	T	T	G	.	-	.	.	C	-	-	-	-	-
B27	-	-	-	G	.	C	.	.	.	.	.	.	.	.	C	.	T	G	-	.	C	.	.	.	.	.	.	.	.	.	-	-	.	C	.	.	T	T	G	.	-	.	.	C	-	-	-	-	-
B28	-	-	-	G	.	C	.	.	.	.	.	.	.	.	C	.	T	G	-	.	C	.	.	.	.	.	.	.	.	.	-	-	.	C	.	.	T	T	G	.	-	.	.	C	-	-	-	-	-
B29	C	C	T	.	Y	.	A	.	T	.	G	G	C	S	G	.	T	G	-	.	C	.	.	.	Y	C	A	.	.	.	-	-	.	C	.	.	T	T	G	M	-	.	.	C	-	-	-	-	-
B30	-	-	-	.	.	C	.	Y	.	.	.	M	Y	.	C	.	T	G	-	.	.	.	.	.	.	.	.	.	R	.	-	-	.	C	Y	.	T	.	.	Y	-	.	.	Y	-	-	-	-	-
B32	-	-	-	G	.	C	.	.	.	.	.	.	.	.	C	.	T	G	-	.	C	.	.	.	.	.	.	.	.	.	-	-	.	C	.	.	T	T	G	.	-	.	.	C	-	-	-	-	-
B33	-	-	-	G	.	C	.	.	.	.	.	.	.	.	C	.	T	G	-	.	C	.	.	.	.	.	.	.	.	.	-	-	.	C	.	.	T	T	G	.	-	.	.	C	G	G	C	G	G
B34	W	T	C	G	.	C	.	.	.	.	Y	.	.	.	C	K	.	S	C	.	Y	.	R	.	.	K	K	.	T	.	-	-	.	C	K	.	.	T	S	.	T	.	Y	.	-	-	-	-	-
B35	T	C	C	G	K	C	S	.	.	.	.	W	.	.	C	S	T	G	-	.	C	G	W	.	.	.	.	.	Y	.	-	-	.	C	.	S	.	T	.	S	T	.	Y	Y	-	-	-	-	-
B36	-	-	-	.	Y	C	S	.	.	.	.	.	.	.	C	.	W	G	-	Y	C	.	.	.	.	.	.	.	.	.	-	-	.	Y	.	.	T	T	G	M	-	.	.	C	-	-	-	-	-
B37	-	-	-	G	.	C	.	.	.	.	.	.	.	.	C	.	T	G	-	.	C	.	.	.	.	.	.	.	.	.	-	-	.	C	.	.	T	T	G	.	-	.	.	C	-	-	-	-	-
B38	-	-	S	G	.	C	.	.	.	.	Y	M	Y	.	C	.	W	G	-	.	Y	.	W	.	.	K	K	.	T	.	-	-	.	C	.	.	.	T	.	Y	-	.	.	Y	-	-	-	-	-
B39	-	-	-	-	-	-	-	-	M	.	.	W	.	.	C	K	T	G	-	.	M	.	-	C	.	.	.	.	.	Y	-	-	Y	Y	.	.	C	S	G	S	-	W	W	C	-	-	-	-	-
B41	-	-	-	G	Y	C	.	.	.	.	.	.	.	.	C	.	K	G	-	.	Y	.	.	.	.	.	.	.	.	.	-	-	.	Y	.	.	T	T	G	S	-	.	.	.	-	-	-	-	-
B42	-	-	-	G	.	C	.	.	.	.	.	.	.	.	C	.	T	G	-	.	C	.	.	.	.	.	.	.	.	.	-	-	.	C	.	.	T	T	G	.	-	.	.	C	-	-	-	-	-
B43	-	-	-	-	-	-	-	.	.	.	.	.	.	.	C	.	T	G	-	C	C	.	.	.	.	C	-	.	.	G	-	-	.	C	.	.	T	T	G	.	-	.	.	C	-	-	-	-	-
B44	-	-	-	G	.	C	.	.	.	.	.	.	.	.	C	.	T	G	-	.	C	.	.	.	.	.	.	.	.	.	-	-	.	C	.	.	T	T	G	.	-	.	.	C	-	-	-	-	-
D48	-	-	-	G	.	C	.	.	.	.	.	.	.	.	C	.	T	G	-	.	C	.	.	.	.	.	.	.	.	.	-	-	.	C	.	.	T	T	G	.	-	.	.	C	-	-	-	-	-
D49	-	-	-	-	-	-	-	.	.	.	.	.	.	.	C	.	T	G	-	.	C	.	.	.	.	C	A	.	.	.	-	-	.	C	.	.	T	T	R	S	-	.	.	C	-	-	-	-	-
D50	-	-	-	-	-	-	-	.	.	.	.	.	.	.	C	.	T	G	-	.	C	.	.	.	.	C	A	.	.	.	-	-	.	C	.	.	T	T	G	.	-	.	.	C	-	-	-	-	-
D51	-	-	-	-	-	-	-	-	.	.	.	.	.	.	C	.	T	G	-	.	C	.	-	C	.	.	.	.	C	.	-	-	.	-	.	.	T	T	G	G	-	.	.	C	-	-	-	-	-
D52	-	-	-	-	-	-	-	.	.	.	.	.	.	.	C	.	T	G	-	.	C	.	.	.	.	C	A	.	.	.	-	-	.	C	.	.	T	T	G	.	-	.	.	C	-	-	-	-	-
D53	-	-	-	G	.	C	.	.	.	.	.	.	.	.	C	.	T	G	-	.	C	.	.	.	.	.	.	.	W	.	-	-	.	C	.	.	T	T	G	S	-	.	.	C	-	-	-	-	-
D54	-	-	-	G	.	C	.	.	.	.	.	.	.	.	C	.	T	G	-	.	C	.	.	.	.	.	.	.	W	.	-	-	.	C	.	.	T	T	G	S	-	.	.	C	-	-	-	-	-
D55	-	-	-	-	-	-	-	-	-	-	-	.	A	A	G	.	T	T	-	G	G	G	G	.	.	G	.	G	-	-	-	-	-	-	-	-	-	-	-	-	-	-	-	-	-	-	-	-	-
D56	-	-	-	-	-	-	-	-	.	.	.	.	.	.	.	.	T	G	-	.	Y	.	-	Y	.	.	.	.	M	.	-	-	.	C	.	.	T	T	.	K	-	.	.	C	-	-	-	-	-
E57	-	-	-	-	-	-	-	.	.	.	.	.	.	.	C	.	T	G	-	.	C	.	.	.	.	C	A	.	.	.	-	-	.	C	.	.	T	T	G	.	-	.	.	C	-	-	-	-	-
E58	-	-	-	-	-	-	-	.	.	.	.	.	.	.	C	.	T	G	-	.	C	.	.	.	.	C	A	.	.	.	-	-	.	C	.	.	T	T	G	.	-	.	.	C	-	-	-	-	-
F59	-	-	-	-	-	-	-	G	T	G	A	.	C	.	T	.	C	G	-	G	A	A	.	W	.	C	A	.	.	.	-	-	.	C	.	.	T	T	G	T	-	.	.	C	-	-	-	-	-
F60	-	-	-	-	-	-	-	-	.	.	.	.	.	.	C	.	T	G	-	.	C	.	.	.	C	.	.	.	.	.	-	-	.	C	K	.	T	.	G	Y	-	.	.	C	-	-	-	-	-
F61	-	-	-	-	-	-	-	-	.	.	.	.	.	.	C	.	T	G	-	.	C	.	-	C	.	.	.	.	.	.	-	-	.	C	.	.	T	T	G	.	-	.	.	C	-	-	-	-	-
F62	-	-	-	-	-	C	.	.	.	.	.	.	.	.	C	.	T	G	-	.	C	.	.	.	.	C	A	.	.	.	-	-	.	C	.	.	T	T	G	.	-	.	.	Y	-	-	-	-	-
F63	T	C	C	A	A	C	.	.	.	.	.	.	.	.	C	.	T	G	-	.	C	.	.	.	.	C	A	.	.	.	-	-	.	C	.	.	T	T	G	.	-	.	.	C	-	-	-	-	-
G64	-	-	-	-	-	-	-	.	.	.	.	.	.	.	C	.	T	G	-	.	C	.	.	.	.	C	A	.	.	.	-	-	.	C	.	.	T	T	G	.	-	.	.	C	-	-	-	-	-
G65	-	-	-	G	.	C	.	.	.	.	.	.	.	.	C	.	T	G	-	.	C	.	.	.	.	.	.	.	.	.	-	-	.	C	.	.	T	T	G	.	-	.	.	C	-	-	-	-	-
G66	-	-	-	G	.	C	.	.	.	.	.	.	.	.	C	.	T	G	-	.	C	.	.	.	.	.	.	.	.	.	-	-	.	C	.	.	T	T	G	.	-	.	.	C	-	-	-	-	-
G67	-	-	-	-	-	-	-	-	.	.	.	M	.	.	.	.	T	G	-	.	Y	.	-	Y	.	.	.	.	.	.	-	-	.	C	.	.	T	T	G	Y	-	.	.	C	-	-	-	-	-
G68	-	-	-	-	-	-	-	.	.	.	.	.	.	.	C	.	T	G	-	.	C	.	.	.	.	C	A	.	.	.	-	-	.	C	.	.	T	T	G	.	-	.	.	C	-	-	-	-	-
G69	-	-	-	G	.	C	.	.	.	.	.	.	.	.	C	.	T	G	-	.	C	.	.	.	.	.	.	.	.	.	-	-	.	C	.	.	T	T	G	.	-	.	.	C	-	-	-	-	-
G70	-	-	-	-	-	-	-	.	.	.	.	.	.	.	C	.	T	G	-	Y	C	.	.	.	.	C	A	.	.	.	-	-	.	C	.	.	T	T	G	.	-	.	.	C	-	-	-	-	-
J74	-	-	-	-	-	-	-	-	.	.	.	.	.	.	C	.	T	G	-	.	C	.	-	C	.	.	.	.	.	.	-	-	.	C	.	.	T	T	G	.	-	.	.	C	-	-	-	-	-
J76	-	-	-	-	-	-	-	.	.	.	.	.	.	.	C	.	T	G	-	.	C	.	.	.	.	C	A	.	.	.	-	-	.	C	.	.	T	T	G	.	-	.	.	C	-	-	-	-	-
J77	-	-	-	-	-	-	-	.	.	.	.	.	.	.	C	.	T	G	-	.	C	.	.	.	.	C	A	.	.	.	-	-	.	C	.	.	T	T	G	.	-	.	.	C	-	-	-	-	-
J78	-	-	-	G	.	C	.	.	.	.	.	.	.	.	C	.	T	G	-	.	Y	.	.	.	.	.	.	.	W	.	-	-	.	C	.	.	T	T	G	Y	-	.	.	.	-	-	-	-	-
J79	-	-	-	G	.	C	.	.	.	.	.	.	.	.	C	.	T	G	-	.	T	.	.	.	.	.	.	.	.	.	-	-	.	C	.	.	T	T	G	Y	-	.	.	Y	-	-	-	-	-
J80	-	-	-	-	-	-	-	-	.	.	.	.	.	.	C	.	T	G	-	.	C	.	-	C	.	Y	S	.	.	.	-	-	.	C	.	.	T	T	G	.	-	.	.	C	-	-	-	-	-
J81	-	-	-	G	.	C	.	.	.	.	.	M	.	Y	C	.	T	G	-	.	W	.	.	.	.	Y	.	.	G	.	-	-	.	C	.	.	T	T	G	S	-	.	.	.	-	-	-	-	-
J82	-	-	-	G	.	C	.	.	.	.	.	.	.	.	C	.	T	G	-	.	C	.	.	.	.	.	.	.	.	.	-	-	.	C	.	.	T	T	G	.	-	.	.	C	-	-	-	-	-
J83	-	-	-	G	.	C	.	.	.	.	.	.	.	.	C	.	T	G	-	.	C	.	.	.	.	.	.	.	.	.	-	-	.	C	.	.	T	T	G	.	-	.	.	C	-	-	-	-	-
J84	-	-	-	G	.	C	.	.	.	.	.	.	.	.	C	.	T	G	-	.	C	.	.	.	.	.	.	.	.	.	-	-	.	C	.	.	T	T	G	.	-	.	.	C	-	-	-	-	-
J85	-	-	-	G	.	C	.	.	.	.	.	.	.	.	C	.	T	G	-	.	C	.	.	.	.	.	.	.	.	.	-	-	.	C	.	.	T	T	G	.	-	.	.	C	-	-	-	-	-
F86	-	-	-	G	.	C	.	.	.	.	.	.	.	.	C	.	T	G	-	.	C	.	.	.	.	.	.	.	.	.	-	-	.	C	.	.	T	T	G	.	-	.	.	C	-	-	-	-	-
KU855474.1	-	-	-	-	-	-	.	C	.	.	A	C	G	Y	C	.	A	G	A	G	C	G	C	G	.	G	.	.	T	T	T	G	.	C	C	C	G	C	G	T	C	C	.	C	-	-	-	-	-
	2	2	2	2	2	2	2	2	2	2	2	2	2	2	2	2	2	2	2	2	2	2	2	2	2	2	2	2	2	2	2	2	2	2	2	2	2	2	2	2	2	2	2	2	2	2	2	2	2
	3	3	3	3	3	4	4	4	4	4	4	4	4	4	4	5	5	5	5	5	5	5	5	5	5	6	6	6	6	6	6	6	6	6	6	7	7	7	7	7	7	7	7	7	7	8	8	8	8
	5	6	7	8	9	0	1	2	3	4	5	6	7	8	9	0	1	2	3	4	5	6	7	8	9	0	1	2	3	4	5	6	7	8	9	0	1	2	3	4	5	6	7	8	9	0	1	2	3
Ab1	-	-	-	-	-	-	-	-	-	-	-	-	-	-	-	-	G	K	C	G	G	S	-	-	-	-	C	Y	C	S	M	C	-	-	-	-	-	-	-	-	-	-	-	-	-	-	-	-	Y
Ab2	-	-	-	-	-	-	-	-	-	-	-	-	-	-	-	-	R	G	.	.	.	G	-	-	-	-	.	C	.	G	C	.	-	-	-	-	-	-	-	-	-	-	-	-	-	-	-	-	C
Ab3	-	-	-	-	-	-	-	-	-	-	-	-	-	-	-	-	S	G	Y	K	R	G	-	-	-	-	.	C	.	R	C	.	-	-	-	-	-	-	-	-	-	-	-	-	-	-	-	-	M
Ab4	-	-	-	-	-	-	-	-	-	-	-	-	-	-	-	-	.	G	.	.	.	G	-	-	-	-	.	C	.	K	C	.	-	-	-	-	-	-	-	-	-	-	-	-	-	-	-	-	-
Ab6	-	-	-	-	-	-	-	-	-	-	-	-	-	-	-	-	.	S	.	C	S	T	-	-	-	-	.	T	.	G	G	.	G	G	-	-	-	-	-	-	-	-	-	-	-	-	-	-	A
Ab7	-	-	-	-	-	-	-	-	-	-	-	-	-	-	-	-	.	.	G	.	.	G	-	-	-	-	.	C	S	C	C	.	-	-	-	-	-	-	-	-	-	-	-	-	-	-	-	-	.
Ab8	-	-	-	-	-	-	-	-	-	-	-	-	-	-	-	-	.	G	S	.	.	G	W	K	T	T	.	C	Y	K	C	.	-	-	-	-	-	-	-	-	-	-	-	-	-	-	-	-	C
Ab9	-	-	-	-	-	-	-	-	-	-	-	-	-	-	-	-	.	G	.	.	.	G	-	-	-	-	.	C	.	G	C	.	-	-	-	-	-	-	-	-	-	-	-	-	-	-	-	-	C
Ab10	-	-	-	-	-	-	-	-	-	-	-	-	-	-	-	-	.	G	.	.	.	G	-	-	-	-	.	C	.	G	C	.	-	-	-	-	-	-	-	-	-	-	-	-	-	-	-	-	C
Ab11	A	C	C	T	A	C	A	G	G	A	G	C	G	G	G	T	.	A	.	A	A	A	A	A	A	A	G	T	T	G	C	T	T	C	C	C	A	T	A	C	-	-	-	-	-	-	-	G	C
Ab12	-	-	-	-	-	-	-	-	-	-	-	-	-	-	-	-	.	G	.	.	.	G	-	-	-	-	.	C	.	G	C	.	-	-	-	-	-	-	-	-	-	-	-	-	-	-	-	-	C
Ab13	A	C	C	C	T	C	M	G	C	A	G	C	G	G	G	T	.	R	S	R	W	R	A	M	G	T	G	A	-	G	C	T	T	C	C	Y	A	T	A	C	A	-	-	-	-	-	-	K	M
Ab14	-	-	-	-	-	-	-	-	-	-	-	-	-	-	-	-	T	C	Y	.	W	K	G	Y	T	T	.	S	G	G	S	.	-	-	-	-	-	-	-	-	-	-	-	-	-	-	-	-	-
G16	-	-	-	-	-	-	-	-	-	-	-	-	-	-	-	-	.	G	.	.	.	G	-	-	-	-	S	C	.	G	.	.	-	-	-	-	-	-	-	-	-	-	-	-	-	-	-	-	C
G17	-	-	-	-	-	-	-	-	-	-	-	-	-	-	-	-	S	G	K	.	.	G	-	-	-	-	S	C	.	C	C	.	-	-	-	-	-	-	-	-	-	-	-	-	-	-	-	-	C
Ab19	-	-	-	-	-	-	-	-	-	-	-	-	-	-	-	-	.	G	.	.	.	G	-	-	-	-	.	C	.	G	C	.	-	-	-	-	-	-	-	-	-	-	-	-	-	-	-	-	C
Ab20	-	-	-	-	-	-	-	-	-	-	-	-	-	-	-	-	.	G	.	.	.	G	-	-	-	-	.	C	.	G	C	.	-	-	-	-	-	-	-	-	-	-	-	-	-	-	-	-	C
Ab21	-	-	-	-	-	-	-	-	-	-	-	-	-	-	-	-	R	R	.	.	K	K	-	-	-	-	S	S	Y	G	C	.	-	-	-	-	-	-	-	-	-	-	-	-	-	-	-	-	S
B22	-	-	-	-	-	-	-	-	-	-	-	-	-	-	-	-	.	G	S	.	.	G	-	-	-	-	.	C	.	.	C	.	-	-	-	-	-	-	-	-	-	-	-	-	-	-	-	-	C
B24	-	-	-	-	-	-	-	-	-	-	-	-	-	-	-	-	.	G	.	.	.	G	-	-	-	-	.	C	.	G	C	.	-	-	-	-	-	-	-	-	-	-	-	-	-	-	-	-	C
B25	-	-	-	-	-	-	-	-	-	-	-	-	-	-	-	-	.	G	.	.	.	G	-	-	-	-	.	C	.	.	C	.	-	-	-	-	-	-	-	-	-	-	-	-	-	-	-	-	C
B26	-	-	-	-	-	-	-	-	-	-	-	-	-	-	-	-	.	G	.	.	.	G	-	-	-	-	S	C	.	G	C	.	-	-	-	-	-	-	-	-	-	-	-	-	-	-	-	-	C
B27	-	-	-	-	-	-	-	-	-	-	-	-	-	-	-	-	.	G	.	.	.	G	-	-	-	-	.	C	.	G	C	.	-	-	-	-	-	-	-	-	-	-	-	-	-	-	-	-	C
B28	-	-	-	-	-	-	-	-	-	-	-	-	-	-	-	-	.	G	.	.	.	G	-	-	-	-	.	C	.	G	C	.	-	-	-	-	-	-	-	-	-	-	-	-	-	-	-	-	C
B29	-	-	-	-	-	-	-	-	-	-	-	-	-	-	-	-	.	G	.	.	.	G	-	-	-	-	.	C	.	G	C	.	G	G	C	T	G	C	C	C	C	T	C	C	T	G	G	G	G
B30	-	-	-	-	-	-	-	-	-	-	-	-	-	-	-	-	.	G	S	.	.	G	-	-	-	-	.	C	.	.	C	.	-	-	-	-	-	-	-	-	-	-	-	-	-	-	-	-	C
B32	-	-	-	-	-	-	-	-	-	-	-	-	-	-	-	-	.	G	.	.	.	G	-	-	-	-	.	C	.	G	C	.	-	-	-	-	-	-	-	-	-	-	-	-	-	-	-	-	C
B33	T	G	T	A	C	C	C	T	G	T	T	G	C	T	T	C	.	G	.	.	.	G	-	-	-	-	.	C	.	G	C	.	-	-	-	-	-	-	-	-	-	-	-	-	-	-	-	-	C
B34	-	-	-	-	-	-	-	-	-	-	-	-	-	-	-	-	-	G	Y	.	.	G	-	-	-	-	G	C	.	G	C	.	-	-	-	-	-	-	-	-	-	-	-	-	-	-	-	-	C
B35	-	-	-	-	-	-	-	-	-	-	-	-	-	-	-	-	-	.	T	.	.	G	-	-	-	-	.	C	.	G	C	.	-	-	-	-	-	-	-	-	-	-	-	-	-	-	-	-	C
B36	-	-	-	-	-	-	-	-	-	-	-	-	-	-	-	-	.	G	S	.	.	.	-	-	-	-	.	C	.	G	C	.	-	-	-	-	-	-	-	-	-	-	-	-	-	-	-	-	.
B37	-	-	-	-	-	-	-	-	-	-	-	-	-	-	-	-	.	G	.	.	.	G	-	-	-	-	.	C	.	G	C	.	-	-	-	-	-	-	-	-	-	-	-	-	-	-	-	-	C
B38	-	-	-	-	-	-	-	-	-	-	-	-	-	-	-	-	S	G	K	.	.	G	-	-	-	-	S	C	.	.	C	.	-	-	-	-	-	-	-	-	-	-	-	-	-	-	-	-	C
B39	-	-	-	-	-	-	-	-	-	-	-	-	-	-	-	-	.	G	.	.	.	.	-	-	-	-	.	C	.	R	C	M	-	-	-	-	-	-	-	-	-	-	-	-	-	-	-	-	-
B41	-	-	-	-	-	-	-	-	-	-	-	-	-	-	-	-	.	G	.	.	.	G	-	-	-	-	.	C	.	G	C	.	-	-	-	-	-	-	-	-	-	-	-	-	-	-	-	-	C
B42	-	-	-	-	-	-	-	-	-	-	-	-	-	-	-	-	.	G	.	.	.	G	-	-	-	-	.	C	.	G	C	.	-	-	-	-	-	-	-	-	-	-	-	-	-	-	-	-	C
B43	-	-	-	-	-	-	-	-	-	-	-	-	-	-	-	-	C	G	G	.	.	G	-	-	-	-	.	T	.	C	C	.	G	G	G	T	G	C	C	C	C	T	Y	C	T	G	G	K	K
B44	-	-	-	-	-	-	-	-	-	-	-	-	-	-	-	-	.	G	.	.	.	G	-	-	-	-	.	C	.	G	C	.	-	-	-	-	-	-	-	-	-	-	-	-	-	-	-	-	C
D48	-	-	-	-	-	-	-	-	-	-	-	-	-	-	-	-	.	G	.	.	.	G	-	-	-	-	.	C	.	G	C	.	-	-	-	-	-	-	-	-	-	-	-	-	-	-	-	-	C
D49	-	-	-	-	-	-	-	-	-	-	-	-	-	-	-	-	.	G	.	.	.	G	-	-	-	-	.	C	.	G	C	.	G	G	C	T	G	C	C	C	C	T	C	C	T	G	G	G	G
D50	-	-	-	-	-	-	-	-	-	-	-	-	-	-	-	-	.	G	.	.	.	G	-	-	-	-	.	C	.	G	C	.	G	G	C	T	G	C	C	C	C	T	C	C	T	G	G	G	G
D51	-	-	-	-	-	-	-	-	-	-	-	-	-	-	-	-	.	G	.	.	.	G	-	-	-	-	G	C	.	G	C	.	-	-	-	-	-	-	-	-	-	-	-	-	-	-	-	-	-
D52	-	-	-	-	-	-	-	-	-	-	-	-	-	-	-	-	.	G	.	.	.	G	-	-	-	-	.	C	.	G	C	.	G	G	C	T	G	C	C	C	C	T	C	C	T	G	G	G	G
D53	-	-	-	-	-	-	-	-	-	-	-	-	-	-	-	-	.	G	.	.	.	G	-	-	-	-	.	C	.	G	C	.	-	-	-	-	-	-	-	-	-	-	-	-	-	-	-	-	C
D54	-	-	-	-	-	-	-	-	-	-	-	-	-	-	-	-	.	G	.	.	.	G	-	-	-	-	.	C	.	G	C	.	-	-	-	-	-	-	-	-	-	-	-	-	-	-	-	-	C
D55	A	C	C	T	A	C	A	G	G	A	G	C	G	G	G	T	.	A	.	A	A	A	A	A	-	-	G	T	T	G	C	T	T	C	C	C	A	T	A	C	-	-	-	-	-	-	-	G	C
D56	-	-	-	-	-	-	-	-	-	-	-	-	-	-	-	-	.	G	T	.	.	G	-	-	-	-	G	C	Y	Y	C	.	-	-	-	-	-	-	-	-	-	-	-	-	-	-	-	-	-
E57	-	-	-	-	-	-	-	-	-	-	-	-	-	-	-	-	.	G	.	.	.	G	-	-	-	-	.	C	.	G	C	.	G	G	C	T	G	C	C	C	C	T	C	C	T	G	G	G	G
E58	-	-	-	-	-	-	-	-	-	-	-	-	-	-	-	-	.	G	.	.	.	G	-	-	-	-	.	C	.	G	C	.	G	G	C	T	G	C	C	C	C	T	C	C	T	G	G	G	G
F59	-	-	-	-	-	-	-	-	-	-	-	-	-	-	-	-	.	G	S	.	.	G	-	-	-	-	.	C	.	.	C	.	G	G	S	T	G	C	C	C	C	Y	C	C	T	G	G	G	G
F60	-	-	-	-	-	-	-	-	-	-	-	-	-	-	-	-	.	G	S	.	T	G	-	-	-	-	S	C	.	A	C	G	-	-	-	-	-	-	-	-	-	-	-	-	-	-	-	-	-
F61	-	-	-	-	-	-	-	-	-	-	-	-	-	-	-	-	.	G	.	.	.	G	-	-	-	-	.	C	.	G	C	.	-	-	-	-	-	-	-	-	-	-	-	-	-	-	-	-	-
F62	-	-	-	-	-	-	-	-	-	-	-	-	-	-	-	-	.	G	.	.	.	G	-	-	-	-	.	C	.	G	C	.	G	G	C	T	G	C	C	C	C	T	C	C	-	-	-	-	T
F63	-	-	-	-	-	-	-	-	-	-	-	-	-	-	-	-	.	G	.	.	.	G	-	-	-	-	.	C	.	G	C	.	G	G	C	T	G	C	C	C	C	T	C	C	T	G	G	G	G
G64	-	-	-	-	-	-	-	-	-	-	-	-	-	-	-	-	.	G	.	.	.	G	-	-	-	-	.	C	.	G	C	.	G	G	C	T	G	C	C	C	C	T	C	C	T	G	G	G	G
G65	-	-	-	-	-	-	-	-	-	-	-	-	-	-	-	-	.	G	.	.	.	G	-	-	-	-	.	C	.	G	C	.	-	-	-	-	-	-	-	-	-	-	-	-	-	-	-	-	C
G66	-	-	-	-	-	-	-	-	-	-	-	-	-	-	-	-	.	G	.	.	.	G	-	-	-	-	.	C	.	G	C	.	-	-	-	-	-	-	-	-	-	-	-	-	-	-	-	-	C
G67	-	-	-	-	-	-	-	-	-	-	-	-	-	-	-	-	.	G	S	.	.	G	-	-	-	-	S	C	.	Y	S	.	-	-	-	-	-	-	-	-	-	-	-	-	-	-	-	-	-
G68	-	-	-	-	-	-	-	-	-	-	-	-	-	-	-	-	.	G	S	.	.	G	-	-	-	-	.	C	.	G	C	.	G	G	C	T	G	C	C	C	C	T	C	C	T	G	G	G	G
G69	-	-	-	-	-	-	-	-	-	-	-	-	-	-	-	-	.	G	.	.	.	G	-	-	-	-	.	C	.	G	C	.	-	-	-	-	-	-	-	-	-	-	-	-	-	-	-	-	C
G70	-	-	-	-	-	-	-	-	-	-	-	-	-	-	-	-	S	G	S	.	.	G	-	-	-	-	.	.	Y	.	C	.	G	G	S	T	G	C	C	C	C	T	C	C	T	G	G	G	G
J74	-	-	-	-	-	-	-	-	-	-	-	-	-	-	-	-	.	G	Y	.	.	G	-	-	-	-	S	C	.	G	C	.	-	-	-	-	-	-	-	-	-	-	-	-	-	-	-	-	-
J76	-	-	-	-	-	-	-	-	-	-	-	-	-	-	-	-	.	G	.	.	.	G	-	-	-	-	.	C	.	G	C	.	G	G	C	T	G	C	C	C	C	T	C	C	T	G	G	G	G
J77	-	-	-	-	-	-	-	-	-	-	-	-	-	-	-	-	.	G	.	.	.	G	-	-	-	-	.	C	.	G	C	.	G	G	C	T	G	C	C	C	C	T	C	C	T	G	G	G	G
J78	-	-	-	-	-	-	-	-	-	-	-	-	-	-	-	-	R	G	S	.	.	.	-	-	-	-	M	C	.	W	C	.	-	-	-	-	-	-	-	-	-	-	-	-	-	-	-	-	.
J79	-	-	-	-	-	-	-	-	-	-	-	-	-	-	-	-	.	G	.	.	.	G	-	-	-	-	.	C	.	G	C	.	-	-	-	-	-	-	-	-	-	-	-	-	-	-	-	-	C
J80	-	-	-	-	-	-	-	-	-	-	-	-	-	-	-	-	.	G	.	.	.	G	-	-	-	-	.	C	.	G	C	.	-	-	-	-	-	-	-	-	-	-	-	-	-	-	-	-	-
J81	-	-	-	-	-	-	-	-	-	-	-	-	-	-	-	-	.	G	.	.	.	G	-	-	-	-	.	C	.	K	C	.	-	-	-	-	-	-	-	-	-	-	-	-	-	-	-	-	.
J82	-	-	-	-	-	-	-	-	-	-	-	-	-	-	-	-	.	G	.	.	.	G	-	-	-	-	.	C	.	G	C	.	-	-	-	-	-	-	-	-	-	-	-	-	-	-	-	-	C
J83	-	-	-	-	-	-	-	-	-	-	-	-	-	-	-	-	.	G	.	.	.	G	-	-	-	-	.	C	.	G	C	.	-	-	-	-	-	-	-	-	-	-	-	-	-	-	-	-	C
J84	-	-	-	-	-	-	-	-	-	-	-	-	-	-	-	-	.	G	.	.	.	G	-	-	-	-	.	C	.	G	C	.	-	-	-	-	-	-	-	-	-	-	-	-	-	-	-	-	C
J85	-	-	-	-	-	-	-	-	-	-	-	-	-	-	-	-	.	G	.	.	.	G	-	-	-	-	.	C	.	G	C	.	-	-	-	-	-	-	-	-	-	-	-	-	-	-	-	-	C
F86	-	-	-	-	-	-	-	-	-	-	-	-	-	-	-	-	.	G	.	.	.	G	-	-	-	-	.	C	.	G	C	.	-	-	-	-	-	-	-	-	-	-	-	-	-	-	-	-	C
KU855474.1	-	-	-	-	-	-	-	-	-	-	-	-	-	-	-	-	.	G	.	C	A	A	M	A	A	-	.	C	A	A	C	.	-	-	-	-	-	-	-	-	-	-	-	-	-	-	-	-	-
	3	3	3	3	3	3	3	3	3	3	3	3	3	3	3	3	3	3	3	3	3	3	3	3	3	3	3	3	3	3	3	3	3	3	3	3	3	3	3	3	3	3	3	3	3	3	3	3	3
	1	1	1	1	1	1	1	2	2	2	2	2	2	2	2	2	2	3	3	3	3	3	3	3	3	3	3	4	4	4	4	4	4	4	4	4	4	5	5	5	5	5	5	5	5	5	5	6	6
	3	4	5	6	7	8	9	0	1	2	3	4	5	6	7	8	9	0	1	2	3	4	5	6	7	8	9	0	1	2	3	4	5	6	7	8	9	0	1	2	3	4	5	6	7	8	9	0	1
Ab1	-	-	C	C	C	C	C	G	G	-	-	G	M	C	C	-	-	G	T	G	Y	C	C	R	-	Y	-	-	-	-	-	-	M	R	R	A	K	A	C	-	-	-	-	-	M	T	C	A	Y
Ab2	-	-	.	.	.	.	.	.	.	-	-	.	C	.	.	-	-	.	.	.	C	.	.	G	-	C	-	-	-	-	-	-	C	G	G	.	G	.	.	-	-	-	-	-	C	.	.	.	A
Ab3	-	-	.	.	.	M	.	.	.	-	-	.	C	.	.	-	-	S	.	S	C	.	.	G	-	M	-	-	-	-	-	-	C	S	G	M	G	.	.	-	-	-	-	-	C	.	.	.	A
Ab4	-	-	.	.	.	.	.	.	.	-	-	.	C	.	.	-	-	.	C	.	C	.	.	S	-	C	-	-	-	-	-	-	C	G	G	.	R	.	.	-	-	-	-	-	T	C	.	.	A
Ab6	-	-	S	.	.	.	K	S	K	-	-	.	S	.	.	-	-	-	-	.	S	Y	.	G	A	S	A	-	-	-	-	-	C	S	G	G	R	.	.	-	-	-	-	A	C	Y	.	R	A
Ab7	-	-	.	.	.	.	S	.	.	-	-	.	C	A	.	T	-	.	C	A	C	.	.	.	-	.	-	-	-	-	-	-	C	K	G	.	A	R	S	-	-	-	-	-	C	.	Y	.	A
Ab8	-	-	.	.	.	.	.	.	.	-	-	.	C	.	.	-	-	.	.	S	C	.	.	G	-	C	-	-	-	-	-	-	C	G	G	.	G	.	.	-	-	-	-	-	C	.	.	.	M
Ab9	-	-	.	.	.	.	.	.	.	-	-	.	C	.	.	-	-	.	.	.	C	.	.	G	-	C	-	-	-	-	-	-	C	G	G	.	G	.	.	-	-	-	-	-	C	.	.	.	A
Ab10	-	-	.	.	.	.	.	.	.	-	-	.	C	.	.	-	-	.	.	.	C	.	.	G	-	C	-	-	-	-	-	-	C	G	G	.	G	.	.	-	-	-	-	-	C	.	.	.	A
Ab11	-	C	.	T	T	T	.	.	.	-	-	S	C	.	.	-	-	.	.	C	C	.	.	T	T	-	-	-	-	G	G	G	G	G	G	G	G	.	.	G	G	G	G	G	C	S	.	.	A
Ab12	-	-	.	.	.	.	.	.	.	-	-	.	C	.	.	-	-	.	.	.	C	.	.	G	-	C	-	-	-	-	-	-	C	G	G	.	G	.	.	-	-	-	-	-	C	.	.	.	A
Ab13	G	Y	Y	T	T	T	.	.	.	-	-	.	C	.	.	-	-	S	Y	Y	.	.	S	K	T	C	C	Y	G	G	G	M	S	G	G	G	.	R	G	G	G	G	G	G	C	S	.	.	M
Ab14	-	-	M	.	.	Y	G	.	.	G	-	-	-	-	-	-	-	A	Y	S	S	M	.	G	G	R	G	-	-	-	-	-	G	.	A	.	S	G	.	Y	T	T	C	A	T	C	Y	G	M
G16	-	-	.	.	.	.	.	.	.	-	-	.	C	.	.	-	-	.	.	.	C	.	.	G	-	M	-	-	-	-	-	-	C	G	G	.	G	.	.	-	-	-	-	-	C	.	.	.	A
G17	-	-	.	.	.	.	Y	.	.	-	-	.	.	.	M	-	-	R	Y	.	C	.	.	S	-	.	-	-	-	-	-	-	C	G	G	.	S	M	.	-	-	-	-	-	C	.	.	.	A
Ab19	-	-	.	.	.	.	.	.	.	-	-	.	C	.	.	-	-	.	.	.	C	.	.	G	-	C	-	-	-	-	-	-	C	G	G	.	G	.	.	-	-	-	-	-	C	.	.	.	A
Ab20	-	-	.	.	.	.	.	.	.	-	-	.	S	.	.	-	-	.	W	.	C	.	.	G	-	C	-	-	-	-	-	-	C	G	G	.	G	.	.	-	-	-	-	-	C	.	.	.	A
Ab21	-	-	.	M	S	.	S	.	.	-	-	.	C	.	.	-	-	.	Y	S	C	.	.	G	-	C	-	-	-	-	-	-	C	.	G	.	G	R	M	-	-	-	-	-	C	.	.	.	A
B22	-	-	.	.	.	.	.	.	.	-	-	.	S	.	.	-	-	S	.	.	T	.	.	C	S	C	-	-	-	-	-	-	C	G	G	.	G	.	.	-	-	-	-	-	C	Y	.	.	C
B24	-	-	.	.	.	.	.	.	.	-	-	.	C	.	.	-	-	.	.	.	C	.	.	G	-	C	-	-	-	-	-	-	C	G	G	.	G	.	.	-	-	-	-	-	-	-	-	-	-
B25	-	-	.	.	.	.	.	.	.	-	-	.	C	.	.	-	-	.	.	.	C	.	.	G	-	C	-	-	-	-	-	-	C	G	G	.	G	.	.	-	-	-	-	-	C	.	.	.	A
B26	-	-	.	.	.	.	.	.	.	-	-	.	C	.	.	-	-	.	.	.	C	.	.	G	-	C	-	-	-	-	-	-	C	G	G	.	G	.	.	-	-	-	-	-	C	.	.	.	A
B27	-	-	M	.	M	.	.	.	K	C	T	.	.	M	S	-	-	.	.	K	S	.	M	G	-	.	-	-	-	-	-	-	C	K	G	.	G	.	.	-	-	-	-	-	C	.	.	M	A
B28	-	-	.	.	.	.	.	.	.	-	-	.	C	.	.	-	-	.	.	.	C	.	.	G	-	C	-	-	-	-	-	-	C	G	G	.	G	.	.	-	-	-	-	-	C	.	.	.	A
B29	-	-	.	.	.	.	.	.	.	-	-	.	C	.	.	-	-	.	.	.	C	.	.	G	-	C	-	-	-	-	-	-	C	G	G	G	G	.	.	-	-	-	-	-	A	C	.	.	A
B30	-	-	.	.	.	.	.	.	.	-	-	.	.	M	S	-	-	.	.	.	-	.	S	C	S	C	-	-	-	-	-	-	S	G	G	R	G	.	.	-	-	-	-	-	C	.	.	.	-
B32	-	-	.	.	.	.	.	.	.	-	-	.	C	.	.	-	-	.	.	.	C	.	.	G	-	C	-	-	-	-	-	-	C	G	G	.	G	.	.	-	-	-	-	-	C	.	.	.	A
B33	-	-	.	.	.	.	.	.	.	-	-	.	C	.	.	-	-	.	.	.	C	.	.	G	-	C	-	-	-	-	-	-	C	G	G	.	G	.	.	C	T	-	C	A	A	C	.	.	T
B34	-	-	.	.	.	.	.	.	.	-	-	S	R	S	R	-	-	S	.	S	C	.	.	S	-	C	-	-	-	-	-	-	C	G	G	.	G	G	M	-	-	-	-	-	C	W	S	.	M
B35	-	-	Y	.	.	.	.	.	.	-	-	.	S	.	S	-	-	.	W	S	C	.	.	S	-	C	-	-	-	-	-	-	C	G	G	.	R	R	M	-	-	-	-	-	C	.	.	R	.
B36	-	-	Y	.	.	.	Y	.	.	-	-	.	C	S	S	-	-	S	.	.	.	.	.	G	-	S	-	-	-	-	-	-	C	G	G	.	G	.	.	-	-	-	-	-	C	Y	.	.	A
B37	-	-	.	.	.	.	.	.	.	-	-	.	C	.	.	-	-	.	.	.	C	.	.	G	-	C	-	-	-	-	-	-	C	G	G	.	G	.	.	-	-	-	-	-	C	.	.	.	A
B38	-	-	.	.	.	.	.	.	.	-	-	.	.	.	.	-	-	S	.	S	C	.	.	S	-	C	-	-	-	-	-	-	S	G	G	.	G	.	.	-	-	-	-	-	C	.	.	.	A
B39	-	-	.	.	.	.	.	.	.	-	-	.	C	.	.	-	-	.	C	.	C	.	.	G	-	C	-	-	-	-	-	-	C	K	.	.	G	.	.	-	-	-	-	-	T	C	.	.	A
B41	-	-	.	.	S	S	.	.	.	-	-	.	.	.	.	-	-	.	W	.	C	.	.	G	-	C	-	-	-	-	-	-	C	G	G	.	G	M	.	-	-	-	-	-	C	.	.	.	A
B42	-	-	.	.	.	.	.	.	.	-	-	.	C	.	.	-	-	.	C	.	C	.	.	G	-	C	-	-	-	-	-	-	C	G	G	.	G	.	.	C	T	-	C	A	A	C	.	.	T
B43	-	-	K	S	.	.	.	.	.	-	-	.	S	.	.	G	M	.	.	.	S	M	S	M	-	C	-	-	-	-	-	-	G	G	G	G	G	.	.	-	-	-	-	-	C	C	.	S	A
B44	-	-	.	.	.	.	.	.	.	-	-	.	C	.	.	-	-	.	.	.	C	.	.	G	-	C	-	-	-	-	-	-	C	G	G	.	G	.	.	C	T	-	C	A	A	C	.	.	T
D48	-	-	.	.	.	.	.	.	.	-	-	.	C	.	.	-	-	.	.	.	C	.	.	G	-	C	-	-	-	-	-	-	C	G	G	.	G	.	.	C	T	-	C	A	A	C	.	.	T
D49	-	-	.	.	.	.	.	.	.	-	-	.	C	.	.	-	-	.	.	.	C	.	.	G	-	C	-	-	-	-	-	-	C	G	G	G	G	.	.	-	-	-	-	-	A	C	.	.	A
D50	-	-	.	.	.	.	.	.	.	-	-	.	C	.	.	-	-	.	.	.	C	.	.	G	-	C	-	-	-	-	-	-	C	G	G	G	G	.	.	-	-	-	-	-	A	C	.	.	A
D51	-	-	.	.	.	T	A	C	T	-	-	.	A	.	.	-	-	K	C	R	M	M	.	.	-	C	-	-	-	-	-	-	C	G	.	.	A	.	.	A	K	-	T	T	Y	M	A	.	G
D52	-	-	.	.	.	.	.	.	.	-	-	.	C	.	.	-	-	.	.	.	C	.	.	G	-	C	-	-	-	-	-	-	C	G	G	G	G	.	.	-	-	-	-	-	A	C	.	.	A
D53	-	-	.	.	.	.	.	.	.	-	-	.	C	.	.	-	-	.	.	.	C	.	.	G	-	C	-	-	-	-	-	-	C	G	G	.	G	.	.	-	-	-	-	-	C	.	.	.	A
D54	-	-	.	.	.	.	.	.	.	-	-	.	C	.	.	-	-	.	.	.	C	.	.	G	-	C	-	-	-	-	-	-	C	G	G	.	G	.	.	-	-	-	-	-	C	.	.	.	A
D55	-	C	.	T	T	T	.	.	.	-	-	.	C	.	.	-	-	.	.	C	C	.	.	T	T	C	C	T	G	G	G	A	G	G	G	G	G	.	.	G	G	G	G	G	C	C	.	.	A
D56	-	-	S	.	.	.	.	.	.	-	-	K	C	.	.	-	-	Y	C	.	C	.	.	C	-	C	-	-	-	-	-	-	C	G	G	.	S	.	.	-	-	-	-	-	Y	C	.	.	A
E57	-	-	.	.	.	.	.	.	.	-	-	.	C	.	.	-	-	.	.	.	C	.	.	G	-	C	-	-	-	-	-	-	C	G	G	G	G	.	.	-	-	-	-	-	A	C	.	.	A
E58	-	-	.	.	.	.	.	.	.	-	-	.	C	.	.	-	-	.	.	.	C	.	.	G	-	C	-	-	-	-	-	-	C	G	G	G	G	.	.	-	-	-	-	-	A	C	.	.	A
F59	-	-	S	.	.	.	.	S	.	-	-	.	C	.	.	-	-	.	.	.	C	.	.	G	-	C	-	-	-	-	-	-	C	G	G	G	G	.	.	-	-	-	-	-	A	C	.	R	A
F60	-	-	-	-	-	-	-	-	-	-	-	-	-	-	-	-	-	-	-	.	C	.	.	G	-	C	-	-	-	-	-	-	C	G	A	.	G	.	.	-	-	-	-	-	-	-	T	.	A
F61	-	-	.	.	.	.	.	.	.	-	-	.	C	.	.	-	-	.	C	.	C	.	.	G	-	C	-	-	-	-	-	-	C	G	G	.	G	.	.	-	-	-	-	-	T	C	.	.	A
F62	-	-	T	.	.	.	.	-	-	-	-	-	C	.	A	G	A	A	G	.	A	T	.	A	T	T	C	-	-	-	-	-	C	G	G	G	G	G	A	-	-	-	-	-	T	.	.	.	T
F63	-	-	.	.	.	.	.	.	.	-	-	.	C	.	.	-	-	.	.	.	C	.	.	G	-	C	-	-	-	-	-	-	C	G	G	G	G	.	.	-	-	-	-	-	A	C	.	.	A
G64	-	-	.	.	.	.	.	.	.	-	-	.	C	.	.	-	-	.	.	.	C	.	.	G	-	C	-	-	-	-	-	-	C	G	G	G	G	.	.	-	-	-	-	-	A	C	.	.	A
G65	-	-	.	.	.	.	.	.	.	-	-	.	C	.	.	-	-	.	.	.	C	.	.	G	-	C	-	-	-	-	-	-	C	G	G	.	G	.	.	-	-	-	-	-	C	.	.	.	A
G66	-	-	.	.	.	.	.	.	.	-	-	.	C	.	.	-	-	.	.	.	C	.	.	G	-	C	-	-	-	-	-	-	C	G	G	.	G	.	.	-	-	-	-	-	C	.	.	.	A
G67	-	-	.	.	.	.	.	.	.	-	-	.	S	.	.	-	-	S	C	.	C	.	.	S	-	C	-	-	-	-	-	-	C	G	G	.	G	.	.	-	-	-	-	-	T	C	.	.	A
G68	-	-	.	.	.	.	.	.	.	-	-	.	C	.	.	-	-	.	.	.	C	.	.	G	-	C	-	-	-	-	-	-	C	G	G	G	G	.	.	-	-	-	-	-	A	C	.	.	A
G69	-	-	.	.	.	.	.	.	.	-	-	.	C	.	.	-	-	.	.	.	C	.	.	G	-	C	-	-	-	-	-	-	C	G	G	.	G	.	.	C	T	-	C	A	A	C	.	.	T
G70	-	-	.	.	.	.	.	.	.	-	-	.	C	.	.	-	-	.	.	.	C	.	.	G	-	C	-	-	-	-	-	-	C	G	K	G	G	.	.	-	-	-	-	-	A	C	.	R	A
J74	-	-	.	.	.	.	.	.	.	-	-	.	Y	.	.	-	-	.	C	.	C	.	.	G	-	C	-	-	-	-	-	-	C	G	G	.	G	.	.	-	-	-	-	-	T	C	.	M	A
J76	-	-	.	.	.	.	.	.	.	-	-	.	C	.	.	-	-	.	.	.	C	.	.	G	-	C	-	-	-	-	-	-	C	G	G	G	G	.	.	-	-	-	-	-	A	C	.	.	A
J77	-	-	.	.	.	.	.	.	.	-	-	.	C	.	.	-	-	.	.	.	C	.	.	G	-	C	-	-	-	-	-	-	C	G	G	G	G	.	.	-	-	-	-	-	A	C	.	.	A
J78	-	-	.	.	.	.	.	.	.	-	-	.	.	.	.	-	-	R	W	.	C	.	.	G	-	C	-	-	-	-	-	-	C	G	G	.	G	.	.	-	-	-	-	-	.	.	.	.	W
J79	-	-	.	.	.	.	.	.	.	-	-	.	C	.	.	-	-	.	.	.	C	.	.	G	-	C	-	-	-	-	-	-	C	G	G	.	G	.	.	-	-	-	-	-	C	.	.	.	A
J80	-	-	.	.	.	.	.	.	.	-	-	.	Y	.	.	-	-	.	C	.	C	.	.	K	-	C	-	-	-	-	-	-	C	G	G	.	G	.	.	-	-	-	-	-	T	C	.	.	A
J81	-	-	.	.	.	.	.	.	.	-	-	.	C	.	.	-	-	.	.	.	C	.	S	G	A	C	-	-	-	-	-	-	C	G	G	.	G	.	.	-	-	-	-	-	C	.	.	.	R
J82	-	-	.	.	.	.	.	.	.	-	-	.	C	.	.	-	-	.	.	.	C	.	.	G	-	C	-	-	-	-	-	-	C	G	G	.	G	.	.	C	T	-	C	A	A	C	.	.	T
J83	-	-	.	.	.	.	.	.	.	-	-	.	C	.	.	-	-	.	.	.	C	.	.	G	-	C	-	-	-	-	-	-	C	G	G	.	G	.	.	C	T	-	C	A	A	C	.	.	T
J84	-	-	.	.	.	.	.	.	.	-	-	.	C	.	.	-	-	.	.	.	C	.	.	G	-	C	-	-	-	-	-	-	C	G	G	.	G	.	.	C	T	-	C	A	A	C	.	.	T
J85	-	-	.	.	.	.	.	.	.	-	-	.	C	.	.	-	-	.	.	.	C	.	.	G	-	C	-	-	-	-	-	-	C	G	G	.	G	.	.	-	-	-	-	-	C	.	.	.	A
F86	-	-	.	.	.	.	.	.	.	-	-	.	C	.	.	-	-	.	.	.	C	.	.	G	-	C	-	-	-	-	-	-	C	G	G	.	G	.	.	C	T	-	C	A	A	C	.	.	T
KU855474.1	A	A	.	A	T	A	A	A	.	-	-	A	A	A	.	G	A	.	C	T	T	.	T	G	-	-	-	-	-	-	-	-	C	T	G	C	G	G	.	-	-	-	-	-	C	C	.	.	G
	3	3	3	3	3	3	3	3	3	4	4	4	4	4	4	4	4	4	4	4	4	4	4	4	4	4	4	4	4	4	4	4	4	4	4	4	4	4	4	4	4	4	4	4	4	4	4	4	4
	9	9	9	9	9	9	9	9	9	0	0	0	0	0	0	0	0	0	0	1	1	1	1	1	1	1	1	1	1	2	2	2	2	2	2	2	2	2	2	3	3	3	3	3	3	3	3	3	3
	1	2	3	4	5	6	7	8	9	0	1	2	3	4	5	6	7	8	9	0	1	2	3	4	5	6	7	8	9	0	1	2	3	4	5	6	7	8	9	0	1	2	3	4	5	6	7	8	9
Ab1	-	-	-	-	-	-	-	-	-	-	-	-	-	-	-	-	-	-	-	-	-	-	G	A	A	C	A	S	T	G	-	-	-	-	T	Y	T	M	W	-	-	W	G	-	G	T	T	G	C
Ab2	-	-	-	-	-	-	-	-	-	-	-	-	-	-	-	-	-	-	-	-	-	-	.	.	.	.	.	C	.	.	-	-	-	-	.	.	.	G	A	-	-	A	.	-	.	.	.	.	.
Ab3	-	-	-	-	-	-	-	-	-	-	-	-	-	-	-	-	-	-	-	-	-	-	.	.	.	.	.	C	.	.	-	-	-	-	.	C	W	G	A	-	-	A	.	-	.	.	.	S	.
Ab4	-	-	-	-	-	-	-	-	-	-	-	-	-	-	-	-	-	-	-	-	-	-	.	.	.	.	.	C	.	.	-	-	-	-	.	C	.	R	A	-	-	A	.	-	.	.	.	.	.
Ab6	-	-	-	-	-	-	-	-	-	-	-	-	-	-	-	-	-	-	-	-	-	-	.	R	.	.	.	C	.	.	-	-	-	-	.	S	.	G	A	-	-	A	R	-	.	.	.	K	S
Ab7	-	-	-	-	-	-	-	-	-	-	-	-	-	-	-	-	-	-	-	-	-	-	-	-	.	.	R	A	.	A	-	-	-	-	.	T	.	G	A	-	-	A	.	-	A	.	W	C	S
Ab8	-	-	-	-	-	-	-	-	-	-	-	-	-	-	-	-	-	-	-	-	-	-	.	.	.	.	R	C	.	.	-	-	-	-	.	C	.	G	A	-	-	A	K	-	.	.	.	S	.
Ab9	-	-	-	-	-	-	-	-	-	-	-	-	-	-	-	-	-	-	-	-	-	-	.	.	.	.	.	C	.	.	-	-	-	-	.	C	.	G	A	-	-	A	.	-	.	.	.	.	.
Ab10	-	-	-	-	-	-	-	-	-	-	-	-	-	-	-	-	-	-	-	-	-	-	.	.	.	.	.	C	.	.	-	-	-	-	.	C	.	G	A	-	-	A	.	-	.	.	.	.	.
Ab11	-	-	-	-	-	-	-	-	-	-	-	-	-	-	S	C	T	K	A	G	G	G	C	.	G	.	.	A	.	.	R	C	G	C	.	M	G	R	A	C	A	G	S	C	A	.	K	-	.
Ab12	-	-	-	-	-	-	-	-	-	-	-	-	-	-	-	-	-	-	-	-	-	-	.	.	.	.	.	C	.	.	-	-	-	-	.	C	.	G	A	-	-	A	.	-	.	.	.	.	.
Ab13	-	-	-	-	-	-	-	-	-	-	-	-	-	-	Y	Y	S	S	A	R	G	G	M	.	C	M	.	A	K	.	A	S	S	K	.	M	G	.	A	C	A	G	.	C	A	.	G	K	.
Ab14	-	-	-	-	-	-	-	-	-	-	-	-	-	-	-	-	-	-	-	-	-	-	.	G	C	.	R	R	.	A	C	C	-	-	W	M	C	K	R	-	-	R	R	A	S	K	Y	T	.
G16	-	-	-	-	-	-	-	-	-	-	-	-	-	-	-	-	-	-	-	-	-	-	.	.	.	.	.	C	.	.	-	-	-	-	.	S	.	G	A	-	-	A	.	-	.	.	.	.	.
G17	-	-	-	-	-	-	-	-	-	-	-	-	-	-	-	-	-	-	-	-	-	-	.	R	.	.	R	M	.	K	-	-	-	-	.	.	W	R	A	-	-	A	.	-	.	.	.	K	.
Ab19	-	-	-	-	-	-	-	-	-	-	-	-	-	-	-	-	-	-	-	-	-	-	.	.	.	.	.	C	.	.	-	-	-	-	.	C	.	G	A	-	-	A	.	-	.	.	.	.	.
Ab20	-	-	-	-	-	-	-	-	-	-	-	-	-	-	-	-	-	-	-	-	-	-	.	.	.	.	.	C	.	.	-	-	-	-	W	C	.	G	A	-	-	A	.	-	.	.	.	.	.
Ab21	-	-	-	-	-	-	-	-	-	-	-	-	-	-	-	-	-	-	-	-	-	-	.	.	.	.	W	C	.	.	G	-	-	-	.	W	.	K	A	T	T	A	K	-	.	.	Y	K	.
B22	-	-	-	-	-	-	-	-	-	-	-	-	-	-	-	-	-	-	-	-	-	-	.	.	.	.	.	C	.	.	-	-	-	-	.	S	.	G	A	A	-	A	.	G	T	.	C	R	.
B24	-	-	-	-	-	-	-	-	-	-	-	-	-	-	-	-	-	-	-	-	-	-	-	-	-	-	-	-	-	-	-	-	-	-	-	-	-	-	-	-	-	-	-	-	-	-	-	-	-
B25	-	-	-	-	-	-	-	-	-	-	-	-	-	-	-	-	-	-	-	-	-	-	.	.	.	.	.	C	.	.	-	-	-	-	.	C	.	G	A	-	-	A	.	-	.	.	.	.	.
B26	-	-	-	-	-	-	-	-	-	-	-	-	-	-	-	-	-	-	-	-	-	-	.	.	.	.	.	C	.	.	-	-	-	-	.	C	.	G	A	-	-	A	.	-	.	.	.	.	.
B27	-	-	-	-	-	-	-	-	-	-	-	-	-	-	-	-	-	-	-	-	-	-	.	.	.	.	.	C	.	.	-	-	-	-	.	C	.	G	A	-	-	A	.	-	.	.	.	.	.
B28	-	-	-	-	-	-	-	-	-	-	-	-	-	-	-	-	-	-	-	-	-	-	.	.	.	.	.	C	.	.	-	-	-	-	.	C	.	G	A	-	-	A	.	-	.	.	.	.	.
B29	-	-	-	-	-	-	-	-	-	-	-	-	-	-	-	-	-	-	-	-	-	-	.	.	.	.	.	C	.	.	-	-	-	-	.	C	.	G	A	-	-	A	.	-	.	.	.	.	.
B30	-	-	-	-	-	-	-	-	-	-	-	-	-	-	-	-	-	-	-	-	-	-	R	.	.	.	M	C	Y	R	-	-	-	-	.	M	.	G	A	A	-	G	.	T	W	-	-	.	Y
B32	-	-	-	-	-	-	-	-	-	-	-	-	-	-	-	-	-	-	-	-	-	-	.	.	.	.	.	C	.	.	-	-	-	-	.	C	.	G	A	-	-	A	.	-	.	.	.	.	.
B33	-	-	-	-	-	-	-	-	-	-	-	-	-	-	-	-	-	-	-	-	-	-	-	-	-	.	.	C	.	.	-	-	-	-	.	C	.	G	A	-	-	A	.	-	.	.	.	.	.
B34	-	-	-	-	-	-	-	-	-	-	-	-	-	-	-	-	-	-	-	-	-	-	.	S	M	.	R	C	Y	.	-	T	-	-	.	C	.	G	A	-	-	A	.	-	.	.	K	.	.
B35	-	-	-	-	-	-	-	-	-	-	-	-	-	-	-	-	-	-	-	-	-	-	.	-	.	T	K	C	W	.	A	C	-	-	.	C	.	G	A	-	-	A	W	-	R	.	A	K	Y
B36	-	-	-	-	-	-	-	-	-	-	-	-	-	-	-	-	-	-	-	-	-	-	.	.	R	M	.	C	Y	.	-	-	-	-	.	S	.	G	A	-	-	A	.	A	.	.	G	K	.
B37	-	-	-	-	-	-	-	-	-	-	-	-	-	-	-	-	-	-	-	-	-	-	.	.	.	.	.	C	.	.	-	-	-	-	.	C	.	G	A	-	-	A	.	-	.	.	.	.	.
B38	-	-	-	-	-	-	-	-	-	-	-	-	-	-	-	-	-	-	-	-	-	-	.	.	.	.	.	C	.	.	-	-	-	-	.	S	.	G	A	-	-	A	.	-	.	.	.	.	.
B39	-	-	-	-	-	-	-	-	-	-	-	-	-	-	-	-	-	-	-	-	-	-	K	.	.	.	.	C	.	.	-	-	-	-	.	G	.	K	A	-	-	A	.	-	.	.	.	K	Y
B41	-	-	-	-	-	-	-	-	-	-	-	-	-	-	-	-	-	-	-	-	-	-	.	.	.	.	.	C	.	.	-	-	-	-	W	C	.	G	A	-	-	A	.	-	.	.	.	.	.
B42	T	A	C	C	G	A	T	A	C	A	G	A	A	A	A	T	C	G	T	T	A	A	A	.	C	.	.	C	.	.	-	-	-	-	.	C	.	G	A	-	-	A	.	-	.	.	.	.	.
B43	-	-	-	-	-	-	-	-	-	-	-	-	-	-	-	-	-	-	-	-	-	-	R	S	.	.	.	C	.	.	-	-	-	-	K	R	.	G	A	-	-	A	.	-	.	Y	.	.	S
B44	-	-	-	-	-	-	-	-	-	-	-	-	-	-	-	-	-	-	-	-	-	-	-	-	-	.	.	C	.	.	-	-	-	-	.	C	.	G	A	-	-	A	.	-	.	.	.	.	.
D48	-	-	-	-	-	-	-	-	-	-	-	-	-	-	-	-	-	-	-	-	-	-	-	-	-	.	.	C	.	.	-	-	-	-	.	C	.	G	A	-	-	A	.	-	.	.	.	.	.
D49	-	-	-	-	-	-	-	-	-	-	-	-	-	-	-	-	-	-	-	-	-	-	.	.	.	.	.	C	.	.	-	-	-	-	.	C	.	G	A	-	-	A	.	-	.	.	.	.	.
D50	-	-	-	-	-	-	-	-	-	-	-	-	-	-	-	-	-	-	-	-	-	-	.	.	.	.	.	C	.	.	-	-	-	-	.	C	.	G	A	-	-	A	.	-	.	.	.	.	.
D51	-	-	-	-	-	-	-	-	-	-	-	-	-	-	-	-	-	-	-	-	-	-	S	.	.	A	.	C	W	.	-	-	-	-	K	.	.	A	A	-	-	.	.	-	.	K	K	K	.
D52	-	-	-	-	-	-	-	-	-	-	-	-	-	-	-	-	-	-	-	-	-	-	.	.	.	.	.	C	.	.	-	-	-	-	.	C	.	G	A	-	-	A	.	-	.	.	.	.	.
D53	-	-	-	-	-	-	-	-	-	-	-	-	-	-	-	-	-	-	-	-	-	-	.	.	.	.	M	C	.	.	-	-	-	-	.	C	.	G	A	-	-	A	.	-	.	.	.	.	.
D54	-	-	-	-	-	-	-	-	-	-	-	-	-	-	-	-	-	-	-	-	-	-	.	.	.	.	M	C	.	.	-	-	-	-	.	C	.	G	A	-	-	A	.	-	.	.	.	.	.
D55	-	-	-	-	-	-	-	-	-	-	-	-	-	-	C	T	T	G	A	G	G	G	C	.	G	.	.	A	.	.	A	C	G	C	.	C	G	G	A	C	A	G	.	C	A	.	G	-	.
D56	-	-	-	-	-	-	-	-	-	-	-	-	-	-	-	-	-	-	-	-	-	-	S	.	.	.	M	C	.	.	-	-	-	-	.	T	Y	G	A	-	-	A	.	-	.	W	Y	.	.
E57	-	-	-	-	-	-	-	-	-	-	-	-	-	-	-	-	-	-	-	-	-	-	.	.	.	.	.	C	.	.	-	-	-	-	.	C	.	G	A	-	-	A	.	-	.	.	.	.	.
E58	-	-	-	-	-	-	-	-	-	-	-	-	-	-	-	-	-	-	-	-	-	-	.	.	.	.	.	C	.	.	-	-	-	-	.	C	.	G	A	-	-	A	.	-	.	.	.	.	.
F59	-	-	-	-	-	-	-	-	-	-	-	-	-	-	-	-	-	-	-	-	-	-	.	.	.	.	.	M	.	.	-	-	-	-	.	.	.	G	A	-	-	A	.	-	.	.	.	.	.
F60	-	-	-	-	-	-	-	-	-	-	-	-	-	-	-	-	-	-	-	-	-	-	.	.	.	.	M	C	.	.	-	-	-	-	.	S	.	G	A	-	-	A	.	-	T	.	.	.	.
F61	-	-	-	-	-	-	-	-	-	-	-	-	-	-	-	-	-	-	-	-	-	-	.	.	.	.	.	C	.	.	-	-	-	-	.	C	.	G	A	-	-	A	.	-	.	.	.	.	.
F62	-	-	-	-	-	-	-	-	-	-	-	-	-	-	-	-	-	-	-	-	-	-	A	C	.	T	.	T	.	.	-	-	-	-	-	-	M	G	R	T	-	A	T	C	S	.	M	.	.
F63	-	-	-	-	-	-	-	-	-	-	-	-	-	-	-	-	-	-	-	-	-	-	.	.	.	.	.	C	.	.	-	-	-	-	.	C	.	G	A	-	-	A	.	-	.	.	.	.	.
G64	-	-	-	-	-	-	-	-	-	-	-	-	-	-	-	-	-	-	-	-	-	-	.	.	.	.	.	C	.	.	-	-	-	-	.	C	.	G	A	-	-	A	.	-	.	.	.	.	.
G65	-	-	-	-	-	-	-	-	-	-	-	-	-	-	-	-	-	-	-	-	-	-	.	.	.	.	.	C	.	.	-	-	-	-	.	C	.	G	A	-	-	A	.	-	.	.	.	.	.
G66	-	-	-	-	-	-	-	-	-	-	-	-	-	-	-	-	-	-	-	-	-	-	.	.	.	.	.	C	.	.	-	-	-	-	.	C	.	G	A	-	-	A	.	-	.	.	.	.	.
G67	-	-	-	-	-	-	-	-	-	-	-	-	-	-	-	-	-	-	-	-	-	-	.	.	.	.	.	C	.	.	-	-	-	-	.	.	.	G	A	-	-	A	.	-	.	K	K	.	.
G68	-	-	-	-	-	-	-	-	-	-	-	-	-	-	-	-	-	-	-	-	-	-	.	.	.	.	.	C	.	.	-	-	-	-	.	.	.	G	A	-	-	A	.	-	.	.	.	.	.
G69	-	-	-	-	-	-	-	-	-	-	-	-	-	-	-	-	-	-	-	-	-	-	-	-	-	.	.	C	.	.	-	-	-	-	.	C	.	G	A	-	-	A	.	-	.	.	.	.	.
G70	-	-	-	-	-	-	-	-	-	-	-	-	-	-	-	-	-	-	-	-	-	-	.	.	.	.	.	C	.	.	-	-	-	-	.	C	.	G	A	-	-	A	.	-	.	.	.	.	.
J74	-	-	-	-	-	-	-	-	-	-	-	-	-	-	-	-	-	-	-	-	-	-	.	.	.	.	.	C	.	.	-	-	-	-	.	C	.	G	A	-	-	A	.	-	.	.	.	.	.
J76	-	-	-	-	-	-	-	-	-	-	-	-	-	-	-	-	-	-	-	-	-	-	.	.	.	.	.	C	.	.	-	-	-	-	.	C	.	G	A	-	-	A	.	-	.	.	.	.	.
J77	-	-	-	-	-	-	-	-	-	-	-	-	-	-	-	-	-	-	-	-	-	-	.	.	.	.	.	C	.	.	-	-	-	-	.	C	.	G	A	-	-	A	.	-	.	.	.	.	.
J78	-	-	-	-	-	-	-	-	-	-	-	-	-	-	-	-	-	-	-	-	-	-	.	.	.	.	.	M	.	.	-	-	-	-	.	.	.	G	A	-	-	A	.	-	.	.	.	.	.
J79	-	-	-	-	-	-	-	-	-	-	-	-	-	-	-	-	-	-	-	-	-	-	.	.	.	.	.	C	.	.	-	-	-	-	.	S	.	G	A	-	-	A	.	-	.	.	.	.	.
J80	-	-	-	-	-	-	-	-	-	-	-	-	-	-	-	-	-	-	-	-	-	-	.	.	.	.	.	C	.	.	-	-	-	-	.	.	.	G	A	-	-	A	.	-	.	.	.	R	.
J81	-	-	-	-	-	-	-	-	-	-	-	-	-	-	-	-	-	-	-	-	-	-	.	.	.	.	.	C	K	.	-	-	-	-	W	S	K	G	A	-	-	A	.	-	.	.	.	.	.
J82	-	-	-	-	-	-	-	-	-	-	-	-	-	-	-	-	-	-	-	-	-	-	-	-	-	.	.	C	.	.	-	-	-	-	.	C	.	G	A	-	-	A	.	-	.	.	.	.	.
J83	-	-	-	-	-	-	-	-	-	-	-	-	-	-	-	-	-	-	-	-	-	-	-	-	-	.	.	C	.	.	-	-	-	-	.	C	.	G	A	-	-	A	.	-	.	.	.	.	.
J84	-	-	-	-	-	-	-	-	-	-	-	-	-	-	-	-	-	-	-	-	-	-	-	-	-	.	.	C	.	.	-	-	-	-	.	C	.	G	A	-	-	A	.	-	.	.	.	.	.
J85	-	-	-	-	-	-	-	-	-	-	-	-	-	-	-	-	-	-	-	-	-	-	.	.	.	.	.	C	.	.	-	-	-	-	.	C	.	G	A	-	-	A	.	-	.	.	.	.	.
F86	-	-	-	-	-	-	-	-	-	-	-	-	-	-	-	-	-	-	-	-	-	-	-	-	-	.	.	C	.	.	-	-	-	-	.	C	.	G	A	-	-	A	.	-	.	.	.	.	.
KU855474.1	-	-	-	-	-	-	-	-	-	-	-	-	-	-	-	-	-	-	-	-	-	-	-	G	G	T	G	C	.	T	G	C	-	-	C	G	C	A	G	C	A	G	.	A	.	G	.	.	T
	4	4	4	4	4	4	4	4	4	4	4	4	4	4	4	4	4	4	4	4	4	4	4	4	4	4	4	4	4	4	4	5	5	5	5	5	5	5	5	5	5	5	5	5	5	5	5	5	5
	6	7	7	7	7	7	7	7	7	7	7	8	8	8	8	8	8	8	8	8	8	9	9	9	9	9	9	9	9	9	9	0	0	0	0	0	0	0	0	0	0	1	1	1	1	1	1	1	1
	9	0	1	2	3	4	5	6	7	8	9	0	1	2	3	4	5	6	7	8	9	0	1	2	3	4	5	6	7	8	9	0	1	2	3	4	5	6	7	8	9	0	1	2	3	4	5	6	7
Ab1	-	-	-	A	W	C	G	-	T	T	A	A	A	A	C	T	-	T	T	C	A	A	C	A	A	C	-	-	-	-	-	-	-	-	-	-	-	-	-	-	-	-	-	-	-	-	-	-	G
Ab2	-	-	-	.	Y	M	.	-	.	.	.	.	.	.	.	.	-	.	.	.	.	.	.	.	.	.	-	-	-	-	-	-	-	-	-	-	-	-	-	-	-	-	-	-	-	-	-	-	.
Ab3	-	-	-	.	T	.	.	-	A	A	.	.	.	.	.	.	-	.	.	T	.	.	.	G	.	.	-	-	-	-	-	-	-	-	-	-	-	-	-	-	-	-	-	-	-	-	-	-	.
Ab4	A	-	A	.	Y	.	.	-	C	.	.	.	.	.	.	.	-	.	.	.	.	.	.	.	.	.	-	-	-	-	-	-	-	-	-	-	-	-	-	-	-	-	-	-	-	-	-	-	.
Ab6	-	-	-	.	K	T	.	-	-	.	.	.	.	.	.	.	-	.	.	.	G	.	T	C	T	.	-	-	-	-	-	-	-	-	-	-	-	-	-	-	-	-	-	-	-	-	-	-	T
Ab7	-	-	-	.	.	Y	R	-	W	.	M	.	.	.	.	W	-	.	.	M	.	.	M	R	.	A	-	-	-	-	-	-	-	-	-	-	-	-	-	-	-	-	-	-	-	-	-	-	W
Ab8	-	-	-	.	T	.	.	-	.	.	.	.	.	.	.	.	-	.	.	.	.	.	.	.	.	.	-	-	-	-	-	-	-	-	-	-	-	-	-	-	-	-	-	-	-	-	-	-	.
Ab9	-	-	-	.	T	.	.	-	.	.	.	.	.	M	.	.	-	.	.	.	.	M	.	.	.	.	A	A	T	C	G	T	T	A	A	A	M	C	T	T	T	C	A	A	C	A	A	C	.
Ab10	-	-	-	.	T	.	.	-	.	.	.	.	.	.	.	.	-	.	.	.	.	.	.	.	.	.	-	-	-	-	-	-	-	-	-	-	-	-	-	-	-	-	-	-	-	-	-	-	.
Ab11	A	T	G	K	G	S	.	T	.	C	.	.	T	G	G	G	-	-	A	.	R	G	G	C	.	T	-	-	-	-	-	-	-	-	-	-	-	-	-	-	-	-	-	-	-	-	-	-	-
Ab12	-	-	-	.	T	.	.	-	.	.	.	.	.	.	.	.	-	.	.	.	.	.	.	.	.	.	-	-	-	-	-	-	-	-	-	-	-	-	-	-	-	-	-	-	-	-	-	-	.
Ab13	W	S	G	G	G	G	.	T	.	C	.	.	.	R	R	C	-	-	.	.	R	.	T	G	.	W	-	-	-	-	-	-	-	-	-	-	-	-	-	-	-	-	-	-	-	-	-	-	-
Ab14	K	-	-	T	T	.	A	A	.	G	M	K	M	M	A	Y	-	-	.	Y	.	R	W	.	.	A	-	-	-	-	-	-	-	-	-	-	-	-	-	-	-	-	-	-	-	-	-	-	A
G16	-	-	-	.	T	.	.	-	.	.	.	.	.	.	.	.	-	.	.	.	.	.	.	.	.	Y	-	-	-	-	-	-	-	-	-	-	-	-	-	-	-	-	-	-	-	-	-	-	.
G17	-	-	-	.	T	Y	.	-	.	.	.	.	.	.	M	.	-	.	.	.	.	.	.	R	.	.	-	-	-	-	-	-	-	-	-	-	-	-	-	-	-	-	-	-	-	-	-	-	.
Ab19	-	-	-	.	T	.	.	-	.	.	.	.	.	.	.	.	-	.	.	.	.	.	.	.	.	.	-	-	-	-	-	-	-	-	-	-	-	-	-	-	-	-	-	-	-	-	-	-	.
Ab20	-	-	-	.	T	.	.	-	Y	.	.	.	.	.	.	.	-	.	.	.	.	.	.	.	.	.	-	-	-	-	-	-	-	-	-	-	-	-	-	-	-	-	-	-	-	-	-	-	R
Ab21	-	-	-	.	T	A	A	A	.	Y	.	.	.	.	.	.	-	.	.	.	.	.	.	.	.	.	-	-	-	-	-	-	-	-	-	-	-	-	-	-	-	-	-	-	-	-	-	-	.
B22	-	-	-	.	T	.	K	-	.	.	.	.	.	.	Y	.	-	.	.	Y	.	.	M	.	.	S	G	-	-	-	-	-	-	-	-	-	-	-	-	-	-	-	-	-	-	-	-	-	.
B24	-	-	-	-	-	-	A	-	.	.	.	.	.	.	.	.	-	.	.	.	.	.	.	.	.	.	-	-	-	-	-	-	-	-	-	-	-	-	-	-	-	-	-	-	-	-	-	-	.
B25	-	-	-	.	T	.	.	-	.	.	.	.	.	.	.	.	-	.	.	.	.	.	.	.	.	.	-	-	-	-	-	-	-	-	-	-	-	-	-	-	-	-	-	-	-	-	-	-	.
B26	-	-	-	.	T	.	.	-	.	.	.	.	.	.	.	.	-	.	.	.	.	.	.	.	.	.	-	-	-	-	-	-	-	-	-	-	-	-	-	-	-	-	-	-	-	-	-	-	.
B27	-	-	-	.	T	.	.	-	.	.	.	.	.	.	.	.	-	.	.	.	.	.	.	.	.	.	-	-	-	-	-	-	-	-	-	-	-	-	-	-	-	-	-	-	-	-	-	-	.
B28	-	-	-	.	T	.	.	-	.	.	.	.	.	.	.	.	-	.	.	.	.	.	.	.	.	.	-	-	-	-	-	-	-	-	-	-	-	-	-	-	-	-	-	-	-	-	-	-	.
B29	-	-	A	.	T	T	.	-	.	.	.	.	.	.	.	.	-	.	.	.	.	.	.	.	.	.	-	-	-	-	-	-	-	-	-	-	-	-	-	-	-	-	-	-	-	-	-	-	.
B30	-	-	-	.	T	Y	K	-	K	.	.	.	.	.	S	.	-	.	.	.	.	.	M	.	.	M	R	-	-	-	-	-	-	-	-	-	-	-	-	-	-	-	-	-	-	-	-	-	R
B32	-	-	-	.	T	.	.	-	.	.	.	.	.	.	.	.	-	.	.	.	.	.	.	.	.	.	-	-	-	-	-	-	-	-	-	-	-	-	-	-	-	-	-	-	-	-	-	-	.
B33	-	-	-	.	T	.	.	-	.	.	.	.	.	.	.	.	-	.	.	.	.	.	.	.	.	.	-	-	-	-	-	-	-	-	-	-	-	-	-	-	-	-	-	-	-	-	-	-	.
B34	-	-	-	.	T	M	R	-	.	.	.	.	.	W	Y	.	-	.	.	.	.	T	.	R	M	.	-	-	-	-	-	-	-	-	-	-	-	-	-	-	-	-	-	-	-	-	-	-	.
B35	-	-	-	.	T	.	R	-	Y	.	.	.	.	.	Y	.	-	.	.	.	.	.	Y	W	.	S	-	-	-	-	-	-	-	-	-	-	-	-	-	-	-	-	-	-	-	-	-	-	.
B36	-	-	-	.	T	M	.	-	.	.	.	.	.	.	Y	.	-	.	.	.	.	.	.	.	W	S	-	-	-	-	-	-	-	-	-	-	-	-	-	-	-	-	-	-	-	-	-	-	.
B37	-	-	-	.	T	.	.	-	.	.	.	.	.	.	.	.	-	.	.	.	.	.	.	.	.	.	-	-	-	-	-	-	-	-	-	-	-	-	-	-	-	-	-	-	-	-	-	-	.
B38	-	-	-	.	T	M	.	-	.	.	.	.	.	.	.	.	-	.	.	.	.	.	.	.	M	.	-	-	-	-	-	-	-	-	-	-	-	-	-	-	-	-	-	-	-	-	-	-	.
B39	A	-	A	.	.	A	R	-	.	.	.	.	.	.	.	.	-	.	K	M	.	.	Y	W	.	.	-	-	-	-	-	-	-	-	-	-	-	-	-	-	-	-	-	-	-	-	-	-	.
B41	-	-	-	.	T	Y	.	-	.	.	.	.	.	.	.	.	-	.	.	.	.	.	.	.	W	Y	-	-	-	-	-	-	-	-	-	-	-	-	-	-	-	-	-	-	-	-	-	-	.
B42	-	-	-	.	T	.	.	-	.	.	.	.	.	.	.	.	-	.	.	.	.	.	.	.	.	.	-	-	-	-	-	-	-	-	-	-	-	-	-	-	-	-	-	-	-	-	-	-	.
B43	-	-	A	.	T	T	R	-	.	.	.	.	.	.	.	.	-	.	.	.	R	.	.	.	.	S	-	-	-	-	-	-	-	-	-	-	-	-	-	-	-	-	-	-	-	-	-	-	K
B44	-	-	-	.	T	.	.	-	.	.	.	.	.	.	.	.	-	.	.	.	.	.	.	.	.	.	-	-	-	-	-	-	-	-	-	-	-	-	-	-	-	-	-	-	-	-	-	-	.
D48	-	-	-	.	T	.	.	-	.	.	.	.	.	.	.	.	-	.	.	.	.	.	.	.	.	.	-	-	-	-	-	-	-	-	-	-	-	-	-	-	-	-	-	-	-	-	-	-	.
D49	-	-	A	.	T	T	.	-	.	.	.	.	.	.	.	.	-	.	.	.	.	.	.	.	.	.	-	-	-	-	-	-	-	-	-	-	-	-	-	-	-	-	-	-	-	-	-	-	.
D50	-	-	A	.	T	T	.	-	.	.	.	.	.	.	.	.	-	.	.	.	.	.	.	.	.	.	-	-	-	-	-	-	-	-	-	-	-	-	-	-	-	-	-	-	-	-	-	-	.
D51	A	-	A	.	Y	M	K	-	R	.	.	.	.	.	.	.	-	.	.	.	.	.	A	.	.	M	-	-	-	-	-	-	-	-	-	-	-	-	-	-	-	-	-	-	-	-	-	-	R
D52	-	-	A	.	T	T	.	-	.	.	.	.	.	.	.	.	-	.	.	.	.	.	.	.	.	.	-	-	-	-	-	-	-	-	-	-	-	-	-	-	-	-	-	-	-	-	-	-	.
D53	-	-	-	.	T	.	.	-	.	.	.	.	.	.	.	.	-	.	.	.	.	.	.	.	.	.	-	-	-	-	-	-	-	-	-	-	-	-	-	-	-	-	-	-	-	-	-	-	.
D54	-	-	-	.	T	.	.	-	.	.	.	.	.	.	.	.	-	.	.	.	.	.	.	.	.	.	-	-	-	-	-	-	-	-	-	-	-	-	-	-	-	-	-	-	-	-	-	-	.
D55	A	T	G	T	G	.	.	T	.	C	.	.	.	G	A	C	-	-	.	.	G	.	T	G	.	T	-	-	-	-	-	-	-	-	-	-	-	-	-	-	-	-	-	-	-	-	-	-	-
D56	A	-	A	.	T	.	.	-	W	A	W	.	.	.	Y	.	-	.	.	.	.	.	Y	.	W	S	-	-	-	-	-	-	-	-	-	-	-	-	-	-	-	-	-	-	-	-	-	-	.
E57	-	-	A	.	T	T	.	-	.	.	.	.	.	.	.	.	-	.	.	.	.	.	.	.	.	.	-	-	-	-	-	-	-	-	-	-	-	-	-	-	-	-	-	-	-	-	-	-	.
E58	-	-	A	.	T	T	.	-	.	.	.	.	.	.	.	.	-	.	.	.	.	.	.	.	.	.	-	-	-	-	-	-	-	-	-	-	-	-	-	-	-	-	-	-	-	-	-	-	.
F59	C	C	R	.	C	A	C	-	.	G	.	.	C	.	M	.	G	.	Y	T	G	.	A	G	G	T	-	-	-	-	-	-	-	-	-	-	-	-	-	-	-	-	-	-	-	-	-	-	T
F60	C	-	A	.	T	A	A	-	.	.	.	.	.	.	.	.	-	.	.	.	.	W	.	.	W	.	-	-	-	-	-	-	-	-	-	-	-	-	-	-	-	-	-	-	-	-	-	-	.
F61	A	-	A	.	T	.	.	-	.	C	.	.	.	.	.	.	-	.	.	.	.	.	.	.	.	.	-	-	-	-	-	-	-	-	-	-	-	-	-	-	-	-	-	-	-	-	-	-	.
F62	C	-	W	.	T	T	T	Y	Y	G	.	T	G	.	G	.	-	-	.	T	G	G	T	.	R	M	-	-	-	-	-	-	-	-	-	-	-	-	-	-	-	-	-	-	-	-	-	-	M
F63	-	-	A	.	T	T	.	-	.	.	.	.	.	.	.	.	-	.	.	.	.	.	.	.	.	.	-	-	-	-	-	-	-	-	-	-	-	-	-	-	-	-	-	-	-	-	-	-	.
G64	-	-	A	.	T	T	.	-	.	.	.	.	.	.	.	.	-	.	.	.	.	.	.	.	.	.	-	-	-	-	-	-	-	-	-	-	-	-	-	-	-	-	-	-	-	-	-	-	.
G65	-	-	-	.	T	.	.	-	.	.	.	.	.	.	.	.	-	.	.	.	.	.	.	.	.	.	-	-	-	-	-	-	-	-	-	-	-	-	-	-	-	-	-	-	-	-	-	-	.
G66	-	-	-	.	T	.	.	-	.	.	.	.	.	.	.	.	-	.	.	.	.	.	.	.	.	.	-	-	-	-	-	-	-	-	-	-	-	-	-	-	-	-	-	-	-	-	-	-	.
G67	A	-	A	.	T	M	.	-	.	.	.	.	.	.	.	.	-	.	.	.	.	W	.	.	.	.	-	-	-	-	-	-	-	-	-	-	-	-	-	-	-	-	-	-	-	-	-	-	.
G68	-	-	A	.	T	T	.	-	.	.	.	.	.	.	.	.	-	.	.	.	.	.	.	.	.	.	-	-	-	-	-	-	-	-	-	-	-	-	-	-	-	-	-	-	-	-	-	-	.
G69	-	-	-	.	T	.	.	-	.	.	.	.	.	.	.	.	-	.	.	.	.	.	.	.	.	.	-	-	-	-	-	-	-	-	-	-	-	-	-	-	-	-	-	-	-	-	-	-	.
G70	-	-	A	.	T	T	.	-	.	.	.	.	.	.	.	.	-	.	.	.	.	.	.	.	.	.	-	-	-	-	-	-	-	-	-	-	-	-	-	-	-	-	-	-	-	-	-	-	K
J74	A	-	A	.	T	.	.	-	.	.	.	.	.	.	.	.	-	.	.	.	.	.	.	.	.	.	-	-	-	-	-	-	-	-	-	-	-	-	-	-	-	-	-	-	-	-	-	-	.
J76	-	-	A	.	T	T	.	-	.	.	.	.	.	.	.	.	-	.	.	.	.	.	.	.	.	.	-	-	-	-	-	-	-	-	-	-	-	-	-	-	-	-	-	-	-	-	-	-	.
J77	-	-	A	.	T	T	.	-	.	.	.	.	.	.	.	.	-	.	.	.	.	.	.	.	.	.	-	-	-	-	-	-	-	-	-	-	-	-	-	-	-	-	-	-	-	-	-	-	.
J78	-	-	-	.	T	M	.	-	.	.	.	.	.	.	.	.	-	.	.	M	.	.	.	.	.	S	-	-	-	-	-	-	-	-	-	-	-	-	-	-	-	-	-	-	-	-	-	-	K
J79	-	-	-	.	T	.	.	-	.	.	.	.	.	.	.	.	-	.	.	.	.	.	.	.	.	.	-	-	-	-	-	-	-	-	-	-	-	-	-	-	-	-	-	-	-	-	-	-	.
J80	A	-	A	.	T	.	.	-	.	.	.	.	.	.	.	.	-	.	.	.	.	.	.	.	.	.	-	-	-	-	-	-	-	-	-	-	-	-	-	-	-	-	-	-	-	-	-	-	.
J81	-	-	-	.	.	M	.	-	.	.	.	.	.	.	.	.	-	.	.	.	.	R	S	.	W	.	-	-	-	-	-	-	-	-	-	-	-	-	-	-	-	-	-	-	-	-	-	-	.
J82	-	-	-	.	T	.	.	-	.	.	.	.	.	.	.	.	-	.	.	.	.	.	.	.	.	.	-	-	-	-	-	-	-	-	-	-	-	-	-	-	-	-	-	-	-	-	-	-	.
J83	-	-	-	.	T	.	.	-	.	.	.	.	.	.	.	.	-	.	.	.	.	.	.	.	.	.	-	-	-	-	-	-	-	-	-	-	-	-	-	-	-	-	-	-	-	-	-	-	.
J84	-	-	-	.	T	.	.	-	.	.	.	.	.	.	.	.	-	.	.	.	.	.	.	.	.	.	-	-	-	-	-	-	-	-	-	-	-	-	-	-	-	-	-	-	-	-	-	-	.
J85	-	-	-	.	T	.	.	-	.	.	M	.	.	.	.	.	-	.	.	.	.	.	.	.	.	.	-	-	-	-	-	-	-	-	-	-	-	-	-	-	-	-	-	-	-	-	-	-	.
F86	-	-	-	.	T	.	.	-	.	.	.	.	.	.	.	.	-	.	.	.	.	.	.	.	.	.	-	-	-	-	-	-	-	-	-	-	-	-	-	-	-	-	-	-	-	-	-	-	.
KU855474.1	-	-	-	-	-	.	.	-	-	-	-	-	-	.	.	.	-	C	.	.	G	G	.	.	.	.	-	-	-	-	-	-	-	-	-	-	-	-	-	-	-	-	-	-	-	-	-	-	.
	5	5	5	5	5	5	5	5	5	5	5	5	5	5	5	5	5	5	5	5	5	5	5	5	5	5	5	5	5	5	5	5	5	5	5	5	5	5	5	5	5	5	5	5	5	5	5	5	5
	4	4	4	5	5	5	5	5	5	5	5	5	5	6	6	6	6	6	6	6	6	6	6	7	7	7	7	7	7	7	7	7	7	8	8	8	8	8	8	8	8	8	8	9	9	9	9	9	9
	7	8	9	0	1	2	3	4	5	6	7	8	9	0	1	2	3	4	5	6	7	8	9	0	1	2	3	4	5	6	7	8	9	0	1	2	3	4	5	6	7	8	9	0	1	2	3	4	5
Ab1	-	-	A	G	A	A	C	G	C	A	G	C	-	-	-	-	A	C	T	T	C	G	G	A	A	C	G	G	A	T	T	T	C	-	-	-	-	-	-	C	G	G	T	C	T	C	C	C	C
Ab2	-	-	.	R	.	.	.	.	.	.	K	.	-	-	G	A	.	A	.	G	.	.	A	T	.	.	.	T	.	A	.	G	T	-	-	-	-	-	-	G	A	A	.	-	.	G	.	A	G
Ab3	-	-	.	C	.	.	.	.	.	.	A	.	-	-	-	-	.	.	.	-	.	.	.	.	.	.	.	.	.	.	A	.	.	-	-	-	-	-	-	T	C	.	G	T	C	T	.	G	.
Ab4	-	-	.	A	.	.	.	.	.	.	A	A	-	-	C	A	R	A	-	-	-	-	-	-	-	-	-	-	-	-	-	-	-	-	-	-	-	-	-	-	-	-	-	-	-	-	-	-	-
Ab6	-	-	.	.	.	.	.	.	.	.	.	.	-	-	-	-	.	A	.	G	A	A	.	.	.	.	.	C	.	G	C	A	-	-	-	-	-	-	-	-	-	-	-	-	-	-	-	-	-
Ab7	-	-	.	.	.	.	Y	S	.	W	R	A	-	-	G	A	.	A	A	K	S	.	A	T	W	A	S	T	.	A	.	G	T	-	-	-	-	-	-	K	A	A	W	-	.	R	R	A	R
Ab8	-	-	.	.	.	.	.	.	.	.	.	.	-	-	G	A	.	A	.	G	.	.	A	T	M	S	.	T	.	A	.	K	T	-	-	-	-	-	-	G	A	A	.	-	.	G	.	A	G
Ab9	-	-	.	.	.	.	.	.	.	.	S	.	-	-	G	A	.	A	.	G	.	.	A	T	.	.	.	T	.	A	.	G	T	-	-	-	-	-	-	G	A	A	.	-	.	G	.	A	G
Ab10	-	-	.	.	.	.	.	.	.	.	.	.	-	-	G	A	.	A	.	G	.	.	A	T	.	.	.	T	.	A	.	G	T	-	-	-	-	-	-	G	A	A	.	-	.	G	.	A	G
Ab11	-	C	.	T	W	T	.	-	.	.	T	T	T	C	T	C	T	G	C	G	T	T	Y	T	T	.	A	T	C	G	A	.	K	C	C	G	-	-	-	G	A	A	C	.	A	A	K	A	G
Ab12	-	-	.	.	.	.	.	.	.	.	.	.	-	-	G	A	.	A	.	G	.	.	A	T	.	.	.	T	.	A	.	G	T	-	-	-	-	-	-	G	A	A	.	-	.	G	.	A	G
Ab13	-	C	W	W	W	T	.	S	.	W	T	T	T	C	S	T	T	K	C	G	T	T	T	T	T	.	W	T	C	R	A	K	K	Y	C	K	-	-	-	W	A	A	Y	.	A	A	R	A	M
Ab14	-	-	.	.	.	.	T	K	.	.	S	T	-	-	G	A	.	A	G	S	A	.	A	T	T	T	.	T	.	M	.	G	T	T	C	R	A	T	C	G	A	T	C	T	.	S	.	A	G
G16	-	-	.	.	.	.	.	.	.	.	.	.	-	-	G	A	.	A	.	G	.	.	A	T	.	Y	.	T	.	A	.	G	T	-	-	-	-	-	-	G	A	A	.	-	.	G	.	A	G
G17	-	-	.	R	-	-	-	-	-	-	-	-	-	-	-	-	-	-	-	-	-	-	-	-	-	-	-	-	-	-	-	-	-	-	-	-	-	-	-	-	-	-	-	-	-	-	-	-	-
Ab19	-	-	.	.	.	.	.	.	.	.	.	.	-	-	G	A	.	A	.	G	.	.	A	T	.	.	.	T	.	A	.	G	T	-	-	-	-	-	-	G	A	A	.	-	.	G	.	A	G
Ab20	-	-	.	.	.	.	.	K	.	.	.	.	-	-	G	A	.	A	.	G	.	.	A	T	.	.	.	T	.	A	.	G	T	-	-	-	-	-	-	G	A	A	.	-	.	G	.	A	K
Ab21	-	-	.	.	.	.	.	.	.	.	K	Y	-	-	G	A	.	A	.	G	.	.	A	T	.	M	.	Y	.	A	K	G	T	-	-	-	-	-	-	G	A	A	.	-	.	G	.	W	G
B22	-	-	.	R	.	.	.	R	.	.	.	M	-	-	R	A	.	A	.	G	.	.	A	T	.	Y	.	T	.	A	W	R	T	-	-	-	-	-	-	G	A	A	W	-	.	K	.	A	G
B24	-	-	.	.	.	.	.	.	.	.	.	.	-	-	G	A	.	A	.	G	.	.	A	T	.	.	.	T	.	A	.	G	T	-	-	-	-	-	-	G	A	A	.	-	.	G	.	A	G
B25	-	-	.	.	.	.	.	.	.	.	.	.	-	-	G	A	.	A	.	G	.	.	A	T	.	.	.	T	.	A	.	G	T	-	-	-	-	-	-	G	A	A	.	-	.	G	.	A	G
B26	-	-	.	.	.	.	.	.	.	.	.	.	-	-	G	A	.	A	.	G	.	.	A	T	.	.	.	T	.	A	.	G	T	-	-	-	-	-	-	G	A	A	.	-	.	G	.	A	R
B27	-	-	.	.	.	.	.	.	.	.	.	.	-	-	G	A	.	A	.	G	.	.	A	T	.	.	.	T	.	A	.	G	T	-	-	-	-	-	-	G	A	A	.	-	.	G	.	A	G
B28	-	-	.	.	.	.	.	.	.	.	R	.	-	-	G	A	.	A	.	G	.	.	A	T	.	.	.	T	.	A	.	G	T	-	-	-	-	-	-	G	A	A	.	-	.	G	.	A	G
B29	-	-	.	.	.	.	.	.	.	.	.	.	-	-	G	A	.	A	.	G	.	.	A	T	.	.	.	T	.	A	.	G	T	-	-	-	-	-	-	G	A	A	.	-	.	G	.	A	G
B30	-	-	.	R	.	.	M	.	.	.	C	A	C	A	G	A	.	A	K	G	M	.	A	T	.	Y	.	T	.	A	W	G	T	-	-	-	-	-	-	G	A	A	A	-	.	T	T	R	M
B32	-	-	.	.	.	.	.	.	.	.	.	.	-	-	G	A	.	A	.	G	.	.	A	T	.	.	.	T	.	A	.	G	T	-	-	-	-	-	-	G	A	A	.	-	.	G	.	A	G
B33	-	-	.	.	.	.	.	.	.	.	.	.	-	-	G	A	.	A	.	G	.	.	A	T	.	.	.	T	.	A	.	G	T	-	-	-	-	-	-	G	A	A	.	-	.	G	.	A	G
B34	A	C	.	.	.	R	.	.	M	.	A	Y	-	-	G	A	.	A	.	G	.	.	A	.	.	Y	.	T	.	A	A	K	T	-	-	-	-	-	-	G	M	A	.	-	.	G	A	A	T
B35	-	-	.	K	W	W	.	.	.	.	K	W	-	-	G	A	.	A	.	G	M	.	A	W	.	.	.	W	.	A	.	G	T	-	-	-	-	-	-	G	A	A	.	A	.	K	M	A	K
B36	-	-	.	R	.	.	.	K	Y	.	.	A	-	-	R	A	.	A	.	G	.	.	A	T	.	M	R	Y	.	A	.	G	K	-	-	-	-	-	-	G	A	A	.	-	.	G	.	A	G
B37	-	-	.	.	.	.	.	.	.	.	.	.	-	-	G	A	.	A	.	G	.	.	A	T	.	.	.	T	.	A	.	G	T	-	-	-	-	-	-	G	A	A	.	-	.	G	.	A	G
B38	-	-	.	K	.	.	.	.	.	.	.	M	-	-	G	A	.	A	.	G	.	R	W	T	.	.	.	T	.	A	.	G	T	-	-	-	-	-	-	G	A	A	.	-	.	G	M	A	G
B39	-	-	.	R	.	.	.	.	S	.	K	.	-	-	K	M	W	W	K	G	.	K	A	T	.	R	.	W	.	A	.	G	T	-	-	-	-	-	-	G	A	A	.	-	W	R	.	A	S
B41	-	-	.	R	.	.	.	.	.	.	W	.	-	-	G	A	.	A	Y	R	S	.	A	T	.	M	K	T	.	A	W	G	T	-	-	-	-	-	-	G	A	A	.	-	.	G	.	A	R
B42	-	-	.	.	.	.	.	.	.	.	.	.	-	-	G	A	.	A	.	G	.	.	A	T	.	.	.	T	.	A	.	G	T	-	-	-	-	-	-	G	A	A	.	-	.	G	.	A	G
B43	-	-	.	.	.	.	M	R	M	W	.	.	-	-	G	A	.	A	.	G	.	R	A	T	R	M	.	W	.	W	.	G	T	-	-	-	-	-	-	G	A	A	.	-	W	G	.	A	K
B44	-	-	.	.	.	.	.	.	.	.	.	.	-	-	G	A	.	A	.	G	.	.	A	T	.	.	.	T	.	A	.	G	T	-	-	-	-	-	-	G	A	A	.	-	.	G	.	A	G
D48	-	-	.	.	.	.	.	.	.	.	.	.	-	-	G	A	.	A	.	G	.	.	A	T	.	.	.	T	.	A	.	G	T	-	-	-	-	-	-	G	A	A	.	-	.	G	.	A	G
D49	-	-	.	.	.	.	.	.	.	.	.	M	-	-	G	A	.	A	.	G	.	.	A	T	.	.	.	T	.	A	.	G	T	-	-	-	-	-	-	G	A	A	.	-	.	G	.	A	G
D50	-	-	.	.	.	.	.	.	.	.	.	.	-	-	G	A	.	A	.	G	.	.	A	T	.	.	.	T	.	A	.	G	T	-	-	-	-	-	-	G	A	A	.	-	.	G	.	A	G
D51	-	-	.	.	.	.	M	S	.	W	.	M	-	-	R	A	W	A	.	S	.	M	A	T	R	A	A	W	.	W	.	G	K	-	-	-	-	-	-	R	A	A	.	-	.	G	W	R	R
D52	-	-	.	.	.	.	.	.	.	.	.	.	-	-	G	A	.	A	.	G	.	.	A	T	.	.	.	T	.	A	.	G	T	-	-	-	-	-	-	G	A	A	.	-	.	G	.	A	G
D53	-	-	.	.	.	.	.	.	Y	W	K	.	-	-	G	A	.	A	.	G	.	.	A	T	.	.	.	T	.	A	W	G	T	-	-	-	-	-	-	G	A	A	.	-	.	G	.	A	G
D54	-	-	.	.	.	.	.	.	Y	W	K	.	-	-	G	A	.	A	.	G	.	.	A	T	.	.	.	T	.	A	W	G	T	-	-	-	-	-	-	G	A	A	.	-	.	G	.	A	G
D55	-	C	G	T	.	T	.	.	.	.	T	T	T	C	G	M	W	R	C	G	T	T	C	T	T	.	A	T	C	G	A	.	G	C	C	G	-	-	-	G	A	A	C	.	A	A	G	A	G
D56	-	-	.	.	.	.	.	K	.	.	R	Y	-	-	R	A	.	A	.	G	S	R	A	T	.	S	.	W	.	A	.	G	T	-	-	-	-	-	-	G	A	A	.	-	K	G	.	A	A
E57	-	-	.	.	.	.	.	.	.	.	.	.	-	-	G	A	.	A	.	G	.	.	A	T	.	.	.	T	.	A	.	G	T	-	-	-	-	-	-	G	A	A	.	-	.	G	.	A	G
E58	-	-	.	.	.	.	.	.	.	.	.	.	-	-	G	A	.	A	.	G	.	.	A	T	.	.	.	T	.	A	.	G	T	-	-	-	-	-	-	G	A	A	.	-	.	G	.	A	G
F59	-	-	.	R	.	.	.	R	Y	R	K	S	-	-	G	A	.	A	.	G	.	.	A	W	.	.	.	T	.	A	.	G	T	-	-	-	-	-	-	G	A	A	.	-	.	G	.	A	G
F60	-	-	.	.	.	.	.	.	.	.	.	.	-	-	G	A	.	A	.	G	.	.	A	T	.	A	T	T	.	A	.	G	T	-	-	-	-	-	-	G	A	A	.	-	.	R	.	A	G
F61	-	-	.	.	.	.	.	.	.	.	.	.	-	-	G	A	.	A	.	G	.	.	A	T	.	.	.	T	.	A	.	G	T	-	-	-	-	-	-	G	A	A	.	-	.	G	.	A	G
F62	A	T	T	.	K	T	T	.	.	.	.	T	A	G	G	R	G	A	.	.	-	-	A	Y	T	T	.	K	.	C	C	.	T	-	-	-	-	-	-	T	C	A	.	Y	.	A	W	G	A
F63	-	-	.	.	.	.	.	.	.	.	.	.	-	-	G	A	.	A	.	G	.	.	A	T	.	.	.	T	.	A	.	G	T	-	-	-	-	-	-	G	A	A	.	-	.	G	.	A	G
G64	-	-	.	.	.	.	.	.	.	.	.	.	-	-	G	A	.	A	.	G	.	.	A	T	.	.	.	T	.	A	.	G	T	-	-	-	-	-	-	G	A	A	.	-	.	G	.	A	G
G65	-	-	.	.	.	.	.	.	.	.	.	.	-	-	G	A	.	A	.	G	.	.	A	T	.	.	.	T	.	A	.	G	T	-	-	-	-	-	-	G	A	A	.	-	.	G	.	A	G
G66	-	-	.	.	.	.	.	.	.	.	.	.	-	-	G	A	.	A	.	G	.	.	A	T	.	.	.	T	.	A	.	G	T	-	-	-	-	-	-	G	A	A	.	-	.	G	.	A	G
G67	-	-	.	A	.	.	.	R	.	.	S	M	-	-	G	A	.	A	.	G	.	.	A	T	.	.	.	W	.	A	.	G	K	-	-	-	-	-	-	G	A	A	.	-	.	G	.	A	R
G68	-	-	.	.	.	.	.	.	.	.	.	.	-	-	G	A	.	A	.	G	.	.	A	T	.	.	.	T	.	A	.	G	T	-	-	-	-	-	-	G	A	A	.	-	.	G	.	A	G
G69	-	-	.	.	.	.	.	.	.	.	.	.	-	-	G	A	.	A	.	G	.	.	A	T	.	.	.	T	.	A	.	G	T	-	-	-	-	-	-	G	A	A	.	-	.	G	.	A	G
G70	-	-	.	.	.	.	.	S	.	.	.	.	-	-	G	A	.	A	.	G	.	.	A	T	.	.	.	W	.	W	.	G	T	-	-	-	-	-	-	G	A	A	.	-	.	G	.	A	G
J74	-	-	.	.	.	.	.	R	.	.	.	.	-	-	G	A	.	A	.	G	.	.	A	T	.	.	.	T	.	A	.	G	T	-	-	-	-	-	-	G	A	A	.	-	.	G	.	A	R
J76	-	-	.	.	.	.	.	.	.	.	.	.	-	-	G	A	.	A	.	G	.	.	A	T	.	.	.	T	.	A	.	G	T	-	-	-	-	-	-	G	A	A	.	-	.	G	.	A	G
J77	-	-	.	.	.	.	.	.	.	.	.	.	-	-	G	A	.	A	.	G	.	.	A	T	.	.	.	T	.	A	.	G	T	-	-	-	-	-	-	G	A	A	.	-	.	G	.	A	G
J78	-	-	.	K	.	.	.	.	.	.	.	K	-	-	A	A	.	A	.	K	.	S	A	T	.	.	.	T	.	A	.	G	T	-	-	-	-	-	-	G	A	A	.	-	.	G	.	A	R
J79	-	-	.	S	.	.	.	.	.	.	.	.	-	-	G	A	.	A	.	G	.	.	A	T	.	.	.	T	.	A	.	G	T	-	-	-	-	-	-	G	A	A	.	-	.	G	.	A	G
J80	-	-	.	.	.	.	.	.	.	.	.	.	-	-	G	A	.	A	.	G	.	.	A	T	.	.	.	T	.	A	.	G	T	-	-	-	-	-	-	G	A	A	.	-	.	G	.	A	G
J81	-	-	.	.	.	.	.	.	.	.	.	.	-	-	G	A	.	A	.	G	.	.	A	T	.	.	.	T	.	A	W	G	T	-	-	-	-	-	-	G	M	A	.	-	W	R	.	A	S
J82	-	-	.	.	.	.	.	.	.	.	.	.	-	-	G	A	.	A	.	G	.	.	A	T	.	.	.	T	.	A	.	G	T	-	-	-	-	-	-	G	A	A	.	-	.	G	.	A	G
J83	-	-	.	.	.	.	.	.	.	.	.	.	-	-	G	A	.	A	.	G	.	.	A	T	.	.	.	T	.	A	.	G	T	-	-	-	-	-	-	G	A	A	.	-	.	G	.	A	G
J84	-	-	.	.	.	.	.	.	.	.	.	.	-	-	G	A	.	A	.	G	.	.	A	T	.	.	.	T	.	A	.	G	T	-	-	-	-	-	-	G	A	A	.	-	.	G	.	A	G
J85	-	-	.	.	.	.	.	.	.	.	.	.	-	-	G	A	.	A	.	G	.	.	A	T	.	.	.	T	.	A	.	G	T	-	-	-	-	-	-	G	A	A	.	-	.	G	.	A	G
F86	-	-	.	.	.	.	.	.	.	.	.	.	-	-	G	A	.	A	.	G	.	.	A	T	.	.	.	T	.	A	.	G	T	-	-	-	-	-	-	G	A	A	.	-	.	G	.	A	G
KU855474.1	-	-	.	.	.	.	.	.	T	.	.	.	-	-	G	A	.	A	.	G	.	.	A	T	.	.	T	T	G	G	.	G	T	-	-	-	-	-	-	G	A	A	.	-	.	G	.	A	G
	6	6	6	6	6	6	6	6	6	6	6	6	6	6	6	6	6	6	6	6	6	6	6	6	6	6	6	6	6	6	6	6	6	6	6	6	6	6	6	6	6	6	6	6	6	6	6	6	6
	2	2	2	2	2	3	3	3	3	3	3	3	3	3	3	4	4	4	4	4	4	4	4	4	4	5	5	5	5	5	5	5	5	5	5	6	6	6	6	6	6	6	6	6	6	7	7	7	7
	5	6	7	8	9	0	1	2	3	4	5	6	7	8	9	0	1	2	3	4	5	6	7	8	9	0	1	2	3	4	5	6	7	8	9	0	1	2	3	4	5	6	7	8	9	0	1	2	3
Ab1	-	-	-	-	-	-	W	K	A	A	A	A	A	M	S	-	C	M	A	C	A	A	A	-	-	-	-	-	-	-	-	-	-	-	-	-	-	-	-	-	-	-	-	-	-	-	-	-	-
Ab2	-	-	-	-	-	-	-	T	G	.	.	C	G	C	A	-	.	A	T	T	G	C	G	C	C	C	C	C	-	-	-	-	-	T	G	G	T	A	T	T	C	C	G	G	G	-	-	-	-
Ab3	-	-	-	-	-	-	A	T	G	.	.	.	.	C	G	-	.	A	T	A	.	-	-	-	-	-	-	-	-	-	-	-	-	-	-	-	-	-	-	-	-	-	-	-	-	-	-	-	-
Ab4	-	-	-	-	-	-	-	-	-	-	-	-	-	-	-	-	-	-	-	-	-	-	-	-	-	-	-	-	-	-	-	-	-	-	-	-	-	-	-	-	-	-	-	-	-	-	-	-	-
Ab6	-	-	-	-	-	-	-	-	-	-	-	-	-	-	-	-	-	-	-	-	-	-	-	-	-	-	-	-	-	-	-	-	-	-	-	-	-	-	-	-	-	-	-	-	-	-	-	-	-
Ab7	-	-	-	-	-	-	T	T	T	.	.	M	C	C	C	R	R	G	T	T	G	C	C	C	C	C	S	Y	-	-	-	-	-	C	G	G	T	A	T	T	Y	S	G	G	G	-	-	-	-
Ab8	-	-	-	-	-	-	-	T	G	.	.	C	G	C	A	-	.	A	T	T	G	C	G	C	C	C	C	C	-	-	-	-	-	T	G	G	T	A	T	T	C	S	G	G	G	-	-	-	-
Ab9	-	-	-	-	-	-	-	T	G	.	.	C	G	C	A	-	.	A	T	T	G	C	G	C	C	C	C	C	-	-	-	-	-	T	G	G	T	A	T	T	C	C	G	G	G	-	-	-	-
Ab10	-	-	-	-	-	-	-	T	G	.	.	C	G	C	A	-	.	A	T	T	G	C	G	C	C	C	C	C	-	-	-	-	-	T	G	G	T	A	T	T	C	C	G	G	G	-	-	-	-
Ab11	T	G	-	T	A	T	C	G	G	T	.	M	T	C	A	-	G	.	C	T	G	C	.	A	C	C	T	T	-	C	A	G	A	C	A	G	T	G	T	T	C	M	T	G	G	T	T	G	A
Ab12	-	-	-	-	-	-	-	T	G	.	.	C	G	C	A	-	.	A	T	T	G	C	G	C	C	C	C	C	-	-	-	-	-	T	G	G	T	A	T	T	C	C	G	G	G	-	-	-	-
Ab13	T	W	-	T	A	T	Y	G	R	W	W	Y	T	C	M	-	W	A	M	T	G	S	R	A	C	C	T	T	T	C	A	G	A	M	A	G	S	G	K	Y	C	R	T	G	G	G	T	G	A
Ab14	C	A	G	W	C	T	K	.	W	.	W	C	R	C	G	-	.	A	T	T	G	C	G	C	A	C	T	Y	Y	-	-	-	-	T	G	G	Y	A	T	T	M	C	G	S	G	-	-	-	-
G16	-	-	-	-	-	-	-	T	G	.	W	C	G	C	A	-	.	A	T	T	G	C	G	C	C	C	C	M	-	-	-	-	-	T	G	G	T	A	T	T	C	C	G	G	G	-	-	-	-
G17	-	-	-	-	-	-	-	T	G	.	.	M	S	Y	C	-	.	A	T	T	G	C	Y	C	C	C	C	C	-	-	-	-	-	T	G	G	T	A	T	T	C	C	G	G	G	-	-	-	-
Ab19	-	-	-	-	-	-	-	T	G	.	.	C	G	C	A	-	.	A	T	T	G	C	G	C	C	C	C	C	-	-	-	-	-	T	G	G	T	A	T	T	C	C	G	G	G	-	-	-	-
Ab20	-	-	-	-	-	-	-	T	G	.	.	C	G	C	A	-	.	A	T	T	G	C	G	C	C	C	C	C	-	-	-	-	-	T	G	G	T	A	T	T	C	C	G	G	G	-	-	-	-
Ab21	-	-	-	-	-	-	-	T	G	.	.	C	G	C	A	-	.	R	T	T	G	C	G	C	C	C	S	C	-	-	-	-	-	W	R	K	T	A	T	T	C	Y	G	G	K	-	-	-	-
B22	-	-	-	-	-	-	-	W	R	.	.	C	G	C	A	-	.	W	T	T	G	C	G	C	C	C	C	C	-	-	-	-	-	T	G	G	K	A	T	T	Y	Y	G	G	G	-	-	-	-
B24	-	-	-	-	-	-	-	T	G	.	.	C	G	C	A	-	.	A	T	T	G	C	G	C	C	C	C	C	-	-	-	-	-	T	G	G	T	A	T	T	C	C	G	G	G	-	-	-	-
B25	-	-	-	-	-	-	-	T	G	.	.	C	G	C	A	-	.	A	T	T	G	C	G	C	C	C	C	C	-	-	-	-	-	T	G	G	T	A	T	T	C	C	G	G	G	-	-	-	-
B26	-	-	-	-	-	-	-	T	G	.	.	C	G	C	A	-	.	A	T	T	G	C	G	C	C	C	C	C	-	-	-	-	-	T	G	G	T	A	T	T	C	C	G	G	G	-	-	-	-
B27	-	-	-	-	-	-	-	T	G	.	.	C	G	C	A	-	.	A	T	T	G	C	G	C	C	C	C	C	-	-	-	-	-	T	G	G	T	A	T	T	C	C	G	G	G	-	-	-	-
B28	-	-	-	-	-	-	-	T	G	.	.	C	G	C	A	-	.	A	T	T	G	C	G	C	C	C	C	C	-	-	-	-	-	T	G	G	T	A	T	T	C	C	G	G	G	-	-	-	-
B29	-	-	-	-	-	-	-	T	G	.	.	C	G	C	A	-	.	A	T	T	G	C	G	C	C	C	T	C	-	-	-	-	-	T	G	G	T	A	T	T	C	C	G	G	G	-	-	-	-
B30	-	-	-	-	-	-	-	T	G	.	W	C	K	C	M	-	.	A	Y	Y	S	C	S	C	C	C	C	C	-	-	-	-	-	Y	G	G	T	R	T	W	S	C	G	G	G	-	-	-	-
B32	-	-	-	-	-	-	-	T	G	.	.	C	G	C	A	-	.	A	T	T	G	C	G	C	C	C	C	C	-	-	-	-	-	T	G	G	T	A	T	T	C	C	G	G	G	-	-	-	-
B33	-	-	-	-	-	-	-	T	G	.	.	C	G	C	A	-	.	A	T	T	G	C	G	C	C	C	C	C	-	-	-	-	-	T	G	G	T	A	T	T	C	C	G	G	G	-	-	-	-
B34	-	-	-	-	-	-	-	.	K	.	W	Y	S	C	M	-	.	R	T	Y	G	Y	T	C	C	C	C	C	-	-	-	-	-	Y	S	G	T	A	T	T	S	C	K	G	G	-	-	-	-
B35	-	-	-	-	-	-	-	W	S	.	.	Y	K	C	A	-	.	A	T	T	K	Y	K	C	C	C	C	C	-	-	-	-	-	T	G	K	K	A	T	T	C	C	G	G	G	C	C	C	S
B36	-	-	-	-	-	-	-	T	K	.	.	C	K	C	W	-	.	A	T	T	G	C	G	C	C	C	C	C	-	-	-	-	-	T	G	G	T	A	T	T	C	C	G	G	G	-	-	-	-
B37	-	-	-	-	-	-	-	T	G	.	.	C	G	C	A	-	.	A	T	T	G	C	G	C	C	C	C	C	-	-	-	-	-	T	G	G	T	A	T	T	C	C	G	G	G	-	-	-	-
B38	-	-	-	-	-	-	-	T	G	.	.	C	G	C	A	-	.	A	Y	T	G	C	G	C	C	C	C	C	-	-	-	-	-	T	G	G	T	A	T	T	C	C	G	G	G	-	-	-	-
B39	-	-	-	-	-	-	-	T	R	.	W	Y	G	C	A	A	M	A	T	T	G	C	G	C	C	C	T	C	C	-	-	-	-	T	S	R	T	W	Y	T	S	S	G	G	G	-	-	-	-
B41	-	-	-	-	-	-	-	T	G	.	.	C	G	C	A	-	.	A	T	T	S	C	S	C	C	C	C	Y	-	-	-	-	-	T	G	G	T	A	T	T	C	S	G	G	G	-	-	-	-
B42	-	-	-	-	-	-	-	T	G	.	.	C	G	C	A	-	.	A	T	T	G	C	G	C	C	C	C	C	-	-	-	-	-	T	G	G	T	A	T	T	C	C	G	G	G	-	-	-	-
B43	-	-	-	-	-	-	-	W	S	.	W	C	G	C	A	-	.	A	T	Y	G	C	S	C	C	C	T	C	-	-	-	-	-	T	G	G	K	R	K	K	G	C	G	K	G	-	-	-	-
B44	-	-	-	-	-	-	-	T	G	.	.	C	G	C	A	-	.	A	T	T	G	C	G	C	C	C	C	C	-	-	-	-	-	T	G	G	T	A	T	T	C	C	G	G	G	-	-	-	-
D48	-	-	-	-	-	-	-	T	G	.	.	C	G	C	A	-	.	A	T	T	G	C	G	C	C	C	C	C	-	-	-	-	-	T	G	G	T	A	T	T	C	C	G	G	G	-	-	-	-
D49	-	-	-	-	-	-	-	T	G	.	.	C	G	C	A	-	.	A	T	T	G	C	G	C	C	C	T	C	-	-	-	-	-	T	G	G	T	A	T	T	C	C	G	G	G	-	-	-	-
D50	-	-	-	-	-	-	-	T	G	.	.	C	G	C	A	-	.	A	T	T	G	C	G	C	C	C	T	C	-	-	-	-	-	T	G	G	T	A	T	T	C	C	G	G	G	-	-	-	-
D51	-	-	-	-	-	-	-	T	R	W	R	C	R	Y	M	-	.	A	Y	Y	G	S	S	C	C	C	Y	Y	-	-	-	-	-	T	G	G	Y	A	Y	T	C	C	G	G	G	-	-	-	-
D52	-	-	-	-	-	-	-	T	G	.	.	C	G	C	A	-	.	A	T	T	G	C	G	C	C	C	T	C	-	-	-	-	-	T	G	G	T	A	T	T	C	C	G	G	G	-	-	-	-
D53	-	-	-	-	-	-	-	T	G	.	.	C	G	C	A	-	.	A	T	T	G	C	S	C	C	C	C	C	-	-	-	-	-	T	G	G	T	A	T	T	C	C	G	G	G	-	-	-	-
D54	-	-	-	-	-	-	-	T	G	.	.	C	G	C	A	-	.	A	T	T	G	C	S	C	C	C	C	C	-	-	-	-	-	T	G	G	T	A	T	T	C	C	G	G	G	-	-	-	-
D55	T	G	-	T	W	T	C	G	G	Y	.	C	T	C	A	-	G	A	C	T	G	C	.	A	C	C	T	T	-	C	A	G	A	C	A	G	K	G	T	T	C	A	T	G	G	T	T	G	A
D56	-	-	-	-	-	-	-	T	G	.	.	C	S	.	M	-	.	A	T	T	G	C	M	M	C	C	T	Y	-	-	-	-	-	K	G	G	W	A	T	T	C	C	S	G	G	-	-	-	-
E57	-	-	-	-	-	-	-	T	G	.	.	C	G	C	A	-	.	A	T	T	G	C	G	C	C	C	T	C	-	-	-	-	-	T	G	G	T	A	T	T	C	C	G	G	G	-	-	-	-
E58	-	-	-	-	-	-	-	T	G	.	.	C	G	C	A	-	.	A	T	T	G	C	G	C	C	C	T	C	-	-	-	-	-	T	G	G	T	A	T	T	C	C	G	G	G	-	-	-	-
F59	-	-	-	-	-	-	-	T	G	.	.	Y	K	C	A	-	.	A	T	T	G	C	G	C	C	C	T	C	-	-	-	-	-	T	G	G	T	A	T	K	C	C	G	G	G	-	-	-	-
F60	-	-	-	-	-	-	-	T	G	.	.	C	G	C	A	-	.	A	T	T	G	C	G	C	C	C	C	C	-	-	-	-	-	T	G	G	T	A	T	T	C	C	G	G	G	-	-	-	-
F61	-	-	-	-	-	-	-	T	G	.	.	C	G	C	A	-	.	A	T	T	G	C	G	C	C	C	T	C	-	-	-	-	-	T	G	G	T	A	T	T	C	C	G	G	G	-	-	-	-
F62	-	-	-	-	-	-	-	T	T	T	M	T	T	C	A	-	S	C	C	.	G	C	G	C	A	T	T	C	G	G	-	-	-	T	G	A	A	G	T	T	G	T	T	G	T	G	Y	W	G
F63	-	-	-	-	-	-	-	T	G	.	.	C	G	C	A	-	.	A	T	T	G	C	G	C	C	C	T	C	-	-	-	-	-	T	G	G	T	A	T	T	C	C	G	G	G	-	-	-	-
G64	-	-	-	-	-	-	-	T	G	.	.	C	G	C	A	-	.	A	T	T	G	C	G	C	C	C	T	C	-	-	-	-	-	T	G	G	T	A	T	T	C	C	G	G	G	-	-	-	-
G65	-	-	-	-	-	-	-	T	G	.	.	C	G	C	A	-	.	A	T	T	G	C	G	C	C	C	C	C	-	-	-	-	-	T	G	G	T	A	T	T	Y	C	G	G	G	-	-	-	-
G66	-	-	-	-	-	-	-	T	G	.	.	C	G	C	A	-	.	A	T	T	G	C	G	C	C	C	C	C	-	-	-	-	-	T	G	G	T	A	T	T	C	C	G	G	G	-	-	-	-
G67	-	-	-	-	-	-	-	T	G	.	.	C	G	C	M	-	.	W	T	T	G	C	G	C	C	C	Y	C	-	-	-	-	-	T	G	G	T	A	T	T	C	C	G	G	G	-	-	-	-
G68	-	-	-	-	-	-	-	T	G	.	.	C	G	C	A	-	.	A	T	T	G	C	G	C	C	C	T	C	-	-	-	-	-	T	G	G	T	A	T	T	C	C	G	G	G	-	-	-	-
G69	-	-	-	-	-	-	-	T	G	.	.	C	G	C	A	-	.	A	T	T	G	C	G	C	C	C	C	C	-	-	-	-	-	T	G	G	T	A	T	T	C	C	G	G	G	-	-	-	-
G70	-	-	-	-	-	-	-	T	S	.	.	C	G	C	A	-	.	A	T	T	G	C	G	C	C	C	T	C	-	-	-	-	-	T	G	G	K	A	T	T	C	C	G	G	G	-	-	-	-
J74	-	-	-	-	-	-	-	T	G	.	.	C	G	C	A	-	.	A	T	T	G	C	G	C	C	C	T	C	-	-	-	-	-	T	G	G	T	A	T	T	C	C	G	G	G	-	-	-	-
J76	-	-	-	-	-	-	-	T	G	.	.	C	G	C	A	-	.	A	T	T	G	C	G	C	C	C	T	C	-	-	-	-	-	T	G	G	T	A	T	T	C	C	G	G	G	-	-	-	-
J77	-	-	-	-	-	-	-	T	G	.	.	C	G	C	A	-	.	A	T	T	G	C	G	C	C	C	T	C	-	-	-	-	-	T	G	G	T	A	T	T	C	C	G	G	G	-	-	-	-
J78	-	-	-	-	-	-	-	T	G	.	.	C	G	C	A	-	.	A	T	T	G	C	S	C	C	C	C	C	-	-	-	-	-	T	G	G	T	A	T	T	C	C	G	G	G	-	-	-	-
J79	-	-	-	-	-	-	-	T	G	.	.	C	G	C	A	-	.	A	T	T	G	C	G	C	C	C	C	C	-	-	-	-	-	T	G	G	T	A	T	T	C	C	G	G	G	-	-	-	-
J80	-	-	-	-	-	-	-	T	G	.	.	C	G	C	A	-	.	A	T	T	G	C	G	C	C	C	T	C	-	-	-	-	-	T	G	G	T	A	T	T	C	C	G	G	G	-	-	-	-
J81	-	-	-	-	-	-	-	T	G	.	M	M	G	C	A	-	.	A	T	T	G	C	G	C	C	C	C	M	-	-	-	-	-	T	G	G	T	A	T	T	C	S	G	G	G	-	-	-	-
J82	-	-	-	-	-	-	-	T	G	.	.	C	G	C	A	-	.	A	T	T	G	C	G	C	C	C	C	C	-	-	-	-	-	T	G	G	T	A	T	T	C	C	G	G	G	-	-	-	-
J83	-	-	-	-	-	-	-	T	G	.	.	C	G	C	A	-	.	A	T	T	G	C	G	C	C	C	C	C	-	-	-	-	-	T	G	G	T	A	T	T	C	C	G	G	G	-	-	-	-
J84	-	-	-	-	-	-	-	T	G	.	.	C	G	C	A	-	.	A	T	T	G	C	G	C	C	C	C	C	-	-	-	-	-	T	G	G	T	A	T	T	C	C	G	G	G	-	-	-	-
J85	-	-	-	-	-	-	-	T	G	.	.	C	G	C	A	-	.	A	T	T	G	C	G	C	C	C	C	C	-	-	-	-	-	T	G	G	T	A	T	T	C	C	G	G	G	-	-	-	-
F86	-	-	-	-	-	-	-	T	G	.	.	C	G	C	A	-	.	A	T	T	G	C	G	C	C	C	C	C	-	-	-	-	-	T	G	G	T	A	T	T	C	C	G	G	G	-	-	-	-
KU855474.1	-	-	-	-	-	-	-	T	G	.	.	C	G	C	A	-	A	G	T	T	G	C	G	C	C	C	G	A	-	-	-	-	-	-	A	G	C	C	A	T	C	C	G	G	C	-	C	G	A
	7	7	7	7	7	7	7	7	7	7	7	7	7	7	7	7	7	7	7	7	7	7	7	7	7	7	7	7	7	7	7	7	7	7	7	7	7	7	7	7	7	7	7	7	7	7	7	7	7
	0	0	0	0	0	0	0	1	1	1	1	1	1	1	1	1	1	2	2	2	2	2	2	2	2	2	2	3	3	3	3	3	3	3	3	3	3	4	4	4	4	4	4	4	4	4	4	5	5
	3	4	5	6	7	8	9	0	1	2	3	4	5	6	7	8	9	0	1	2	3	4	5	6	7	8	9	0	1	2	3	4	5	6	7	8	9	0	1	2	3	4	5	6	7	8	9	0	1
Ab1	-	-	-	-	-	-	-	-	-	-	-	-	-	-	-	-	-	-	-	-	-	-	-	-	-	-	-	-	-	-	-	-	-	-	-	-	-	-	-	-	-	-	-	-	-	-	-	-	-
Ab2	-	-	-	-	-	-	-	-	-	-	-	-	-	-	-	C	C	G	A	R	C	G	T	C	-	-	-	-	-	-	-	-	-	-	-	-	-	-	-	A	T	T	G	C	T	G	C	C	C
Ab3	-	-	-	-	-	-	-	-	-	-	-	-	-	-	-	-	-	-	-	-	-	-	-	-	-	-	-	-	-	-	-	-	-	-	-	-	-	-	-	-	-	-	-	-	-	-	-	-	-
Ab4	-	-	-	-	-	-	-	-	-	-	-	-	-	-	-	-	-	-	-	-	-	-	-	-	-	-	-	-	-	-	-	-	-	-	-	-	-	-	-	-	-	-	-	-	-	-	-	-	-
Ab6	-	-	-	-	-	-	-	-	-	-	-	-	-	-	-	-	-	-	-	-	-	-	-	-	-	-	-	-	-	-	-	-	-	-	-	-	-	-	-	-	-	-	-	-	-	-	-	-	-
Ab7	-	-	-	-	-	-	-	-	-	-	-	-	-	-	-	T	Y	R	A	A	M	G	T	K	-	-	-	-	-	-	-	-	-	-	-	-	-	-	-	A	T	T	G	S	T	G	G	C	C
Ab8	-	-	-	-	-	-	-	-	-	-	-	-	-	-	-	C	C	G	A	G	C	G	T	C	-	-	-	-	-	-	-	-	-	-	-	-	-	-	-	A	T	T	G	C	T	S	C	C	C
Ab9	-	-	-	-	-	-	-	-	-	-	-	-	-	-	-	C	C	G	A	G	C	G	T	C	-	-	-	-	-	-	-	-	-	-	-	-	-	-	-	A	T	T	G	C	T	G	C	C	C
Ab10	-	-	-	-	-	-	-	-	-	-	-	-	-	-	-	C	C	G	A	G	C	G	T	C	-	-	-	-	-	-	-	-	-	-	-	-	-	-	-	A	T	T	G	C	T	G	C	C	C
Ab11	-	-	-	-	-	-	-	-	-	-	-	-	-	-	C	C	C	G	G	G	G	G	-	C	A	G	G	-	-	-	-	A	A	A	G	C	C	C	C	C	C	G	G	S	G	S	C	C	C
Ab12	-	-	-	-	-	-	-	-	-	-	-	-	-	-	-	C	C	G	A	G	C	G	T	C	-	-	-	-	-	-	-	-	-	-	-	-	-	-	-	A	T	T	G	C	T	G	C	C	C
Ab13	-	-	-	-	-	-	-	-	-	-	-	-	-	-	S	C	C	G	G	G	G	G	G	S	A	G	G	-	-	-	-	G	A	A	S	C	C	C	C	C	C	S	R	S	G	R	M	C	M
Ab14	-	-	-	-	-	-	-	-	-	-	-	-	-	-	-	C	M	M	A	Y	C	G	W	M	-	-	-	-	-	-	-	-	-	-	-	-	-	-	-	M	T	T	R	C	W	R	S	C	C
G16	-	-	-	-	-	-	-	-	-	-	-	-	-	-	-	C	C	G	A	G	C	G	T	C	-	-	-	-	-	-	-	-	-	-	-	-	-	-	-	A	T	W	G	C	T	G	C	C	C
G17	-	-	-	-	-	-	-	-	-	-	-	-	-	-	-	-	-	-	-	-	-	-	-	-	-	-	-	-	-	-	-	-	-	-	-	-	-	-	C	A	T	T	G	M	T	G	C	C	C
Ab19	-	-	-	-	-	-	-	-	-	-	-	-	-	-	-	C	C	G	A	G	C	G	T	C	-	-	-	-	-	-	-	-	-	-	-	-	-	-	-	A	T	T	G	C	T	G	C	C	C
Ab20	-	-	-	-	-	-	-	-	-	-	-	-	-	-	-	C	C	R	A	G	C	G	T	C	-	-	-	-	-	-	-	-	-	-	-	-	-	-	-	A	T	T	G	C	T	G	C	C	C
Ab21	A	C	A	A	C	C	C	T	C	G	A	G	C	C	C	C	C	G	R	G	G	G	T	G	G	C	C	T	T	G	G	G	G	A	T	C	G	T	C	A	T	T	G	C	T	G	C	C	Y
B22	-	-	-	-	-	-	-	-	-	-	-	-	-	-	-	S	Y	S	A	G	M	G	T	C	-	-	-	-	-	-	-	-	-	-	-	-	-	-	-	A	T	T	K	Y	T	G	C	C	C
B24	-	-	-	-	-	-	-	-	-	-	-	-	-	-	-	C	C	G	A	G	C	G	T	C	-	-	-	-	-	-	-	-	-	-	-	-	-	-	-	A	T	T	G	C	T	G	C	C	C
B25	-	-	-	-	-	-	-	-	-	-	-	-	-	-	-	C	C	G	A	G	C	G	T	C	-	-	-	-	-	-	-	-	-	-	-	-	-	-	-	A	T	T	G	C	T	G	C	C	C
B26	-	-	-	-	-	-	-	-	-	-	-	-	-	-	-	C	C	G	A	G	C	G	T	C	-	-	-	-	-	-	-	-	-	-	-	-	-	-	-	A	T	T	G	C	T	G	C	C	C
B27	-	-	-	-	-	-	-	-	-	-	-	-	-	-	-	C	C	G	A	G	C	G	T	C	-	-	-	-	-	-	-	-	-	-	-	-	-	-	-	A	T	T	G	C	T	G	C	C	C
B28	-	-	-	-	-	-	-	-	-	-	-	-	-	-	-	C	C	G	A	G	C	G	T	C	-	-	-	-	-	-	-	-	-	-	-	-	-	-	-	A	T	T	G	C	T	G	C	C	C
B29	-	-	-	-	-	-	-	-	-	-	-	-	-	-	-	C	C	G	A	G	C	G	T	C	-	-	-	-	-	-	-	-	-	-	-	-	-	-	-	A	T	T	G	C	T	G	C	C	C
B30	-	-	-	-	-	-	-	-	-	-	-	-	-	-	-	Y	Y	G	A	G	M	G	Y	C	-	-	-	-	-	-	-	-	-	-	-	-	-	-	-	W	T	T	G	Y	Y	S	C	C	C
B32	-	-	-	-	-	-	-	-	-	-	-	-	-	-	-	C	C	G	A	G	C	G	T	C	-	-	-	-	-	-	-	-	-	-	-	-	-	-	-	A	T	T	G	C	T	G	C	C	C
B33	-	-	-	-	-	-	-	-	-	-	-	-	-	-	-	C	C	G	A	G	C	G	T	C	-	-	-	-	-	-	-	-	-	-	-	-	-	-	-	A	T	T	G	C	T	G	C	C	C
B34	-	-	-	-	-	-	-	-	-	-	-	-	-	-	-	S	C	K	A	G	C	S	T	C	-	-	-	-	-	-	-	-	-	-	-	-	-	-	-	A	T	K	K	C	T	K	C	C	C
B35	-	-	-	-	-	-	-	-	-	-	-	-	-	-	-	G	S	C	A	T	S	G	T	C	-	-	-	-	-	-	-	-	-	-	-	-	-	-	-	A	T	T	S	C	T	K	Y	C	C
B36	-	-	-	-	-	-	-	-	-	-	-	-	-	-	-	C	C	G	A	G	C	G	T	C	-	-	-	-	-	-	-	-	-	-	-	-	-	-	-	A	T	T	G	C	T	G	C	C	C
B37	-	-	-	-	-	-	-	-	-	-	-	-	-	-	-	C	C	G	A	G	C	G	T	C	-	-	-	-	-	-	-	-	-	-	-	-	-	-	-	A	T	T	G	C	T	G	C	C	C
B38	-	-	-	-	-	-	-	-	-	-	-	-	-	-	-	C	C	G	A	S	C	G	T	C	-	-	-	-	-	-	-	-	-	-	-	-	-	-	-	A	T	T	G	C	T	G	C	C	C
B39	-	-	-	-	-	-	-	-	-	-	-	-	-	-	C	C	C	G	G	G	A	G	C	C	C	C	C	-	-	G	G	K	C	M	T	G	G	S	G	A	T	G	S	K	G	A	Y	C	C
B41	-	-	-	-	-	-	-	-	-	-	-	-	-	-	-	M	C	G	A	G	Y	G	T	C	-	-	-	-	-	-	-	-	-	-	-	-	-	-	-	A	T	W	G	C	T	K	C	C	M
B42	-	-	-	-	-	-	-	-	-	-	-	-	-	-	-	C	C	G	A	G	C	G	T	C	-	-	-	-	-	-	-	-	-	-	-	-	-	-	-	A	T	T	G	C	T	G	C	C	C
B43	-	-	-	-	-	-	-	-	-	-	-	-	-	-	-	C	C	R	A	K	S	G	T	S	-	-	-	-	-	-	-	-	-	-	-	-	-	-	-	A	T	T	G	C	T	G	S	C	C
B44	-	-	-	-	-	-	-	-	-	-	-	-	-	-	-	C	C	G	A	G	C	G	T	C	-	-	-	-	-	-	-	-	-	-	-	-	-	-	-	A	T	T	G	C	T	G	C	C	C
D48	-	-	-	-	-	-	-	-	-	-	-	-	-	-	-	C	C	G	A	G	C	G	T	C	-	-	-	-	-	-	-	-	-	-	-	-	-	-	-	A	T	T	G	C	T	G	C	C	C
D49	-	-	-	-	-	-	-	-	-	-	-	-	-	-	-	C	C	G	A	G	C	G	T	C	-	-	-	-	-	-	-	-	-	-	-	-	-	-	-	A	T	T	G	C	T	G	C	C	C
D50	-	-	-	-	-	-	-	-	-	-	-	-	-	-	-	C	C	G	A	G	C	G	T	C	-	-	-	-	-	-	-	-	-	-	-	-	-	-	-	A	T	T	G	C	T	G	C	C	C
D51	-	-	-	-	-	-	-	-	-	-	-	-	-	-	-	S	S	G	A	G	Y	G	T	C	-	-	-	-	-	-	-	-	-	-	-	-	-	-	-	A	T	T	G	Y	T	G	S	C	C
D52	-	-	-	-	-	-	-	-	-	-	-	-	-	-	-	C	C	G	A	G	C	G	T	C	-	-	-	-	-	-	-	-	-	-	-	-	-	-	-	A	T	T	G	C	T	G	C	C	C
D53	-	-	-	-	-	-	-	-	-	-	-	-	-	-	-	C	C	G	A	G	C	G	T	C	-	-	-	-	-	-	-	-	-	-	-	-	-	-	-	A	T	T	G	C	T	G	C	C	C
D54	-	-	-	-	-	-	-	-	-	-	-	-	-	-	-	C	C	G	A	G	C	G	T	C	-	-	-	-	-	-	-	-	-	-	-	-	-	-	-	A	T	T	G	C	T	G	C	C	C
D55	-	-	-	-	-	-	-	-	-	-	-	-	-	-	C	C	C	G	G	G	G	G	-	C	A	G	G	-	-	-	-	G	A	A	R	C	C	C	C	C	C	G	G	C	G	G	C	C	A
D56	-	-	-	-	-	-	-	-	-	-	-	-	-	-	-	S	S	G	A	R	K	G	T	C	-	-	-	-	-	-	-	-	-	-	-	-	-	-	-	A	T	T	G	C	T	M	C	C	C
E57	-	-	-	-	-	-	-	-	-	-	-	-	-	-	-	C	C	G	A	G	C	G	T	C	-	-	-	-	-	-	-	-	-	-	-	-	-	-	-	A	T	T	G	C	T	G	C	C	C
E58	-	-	-	-	-	-	-	-	-	-	-	-	-	-	-	C	C	G	A	G	C	G	T	C	-	-	-	-	-	-	-	-	-	-	-	-	-	-	-	A	T	T	G	C	T	G	C	C	C
F59	-	-	-	-	-	-	-	-	-	-	-	-	-	-	-	C	C	R	A	K	C	G	T	C	-	-	-	-	-	-	-	-	-	-	-	-	-	-	-	A	T	T	G	C	T	G	M	C	C
F60	-	-	-	-	-	-	-	-	-	-	-	-	-	-	-	C	C	G	A	K	C	G	T	C	-	-	-	-	-	-	-	-	-	-	-	-	-	-	-	A	T	T	G	C	T	S	C	C	C
F61	-	-	-	-	-	-	-	-	-	-	-	-	-	-	-	C	C	G	A	G	C	G	T	C	-	-	-	-	-	-	-	-	-	-	-	-	-	-	-	A	T	T	G	C	T	G	C	C	C
F62	G	A	-	-	-	-	-	-	-	-	-	-	-	-	-	G	T	G	A	G	A	G	T	T	T	C	C	-	-	-	-	-	-	-	-	-	-	-	-	R	A	G	G	T	T	G	C	T	Y
F63	-	-	-	-	-	-	-	-	-	-	-	-	-	-	-	C	C	G	A	G	C	G	T	C	-	-	-	-	-	-	-	-	-	-	-	-	-	-	-	A	T	T	G	C	T	G	C	C	C
G64	-	-	-	-	-	-	-	-	-	-	-	-	-	-	-	C	C	G	A	G	C	G	T	C	-	-	-	-	-	-	-	-	-	-	-	-	-	-	-	A	T	T	G	C	T	G	C	C	C
G65	-	-	-	-	-	-	-	-	-	-	-	-	-	-	-	C	C	G	A	G	C	G	T	C	-	-	-	-	-	-	-	-	-	-	-	-	-	-	-	A	T	T	G	C	T	G	C	C	C
G66	-	-	-	-	-	-	-	-	-	-	-	-	-	-	-	C	C	G	A	G	C	G	T	C	-	-	-	-	-	-	-	-	-	-	-	-	-	-	-	A	T	T	G	C	T	G	C	C	C
G67	-	-	-	-	-	-	-	-	-	-	-	-	-	-	-	C	C	G	A	G	M	G	T	C	-	-	-	-	-	-	-	-	-	-	-	-	-	-	-	W	T	T	G	Y	T	S	C	C	C
G68	-	-	-	-	-	-	-	-	-	-	-	-	-	-	-	C	C	G	A	G	C	G	T	C	-	-	-	-	-	-	-	-	-	-	-	-	-	-	-	A	T	T	G	C	T	G	C	C	C
G69	-	-	-	-	-	-	-	-	-	-	-	-	-	-	-	C	C	G	A	G	C	G	T	C	-	-	-	-	-	-	-	-	-	-	-	-	-	-	-	A	T	T	G	C	T	G	C	C	C
G70	-	-	-	-	-	-	-	-	-	-	-	-	-	-	-	C	C	R	A	K	C	G	T	S	-	-	-	-	-	-	-	-	-	-	-	-	-	-	-	A	T	T	G	C	T	G	C	C	C
J74	-	-	-	-	-	-	-	-	-	-	-	-	-	-	-	C	C	G	A	G	C	G	T	C	-	-	-	-	-	-	-	-	-	-	-	-	-	-	-	A	T	T	G	C	T	G	C	C	C
J76	-	-	-	-	-	-	-	-	-	-	-	-	-	-	-	C	C	G	A	G	C	G	T	C	-	-	-	-	-	-	-	-	-	-	-	-	-	-	-	A	T	T	G	C	T	G	C	C	C
J77	-	-	-	-	-	-	-	-	-	-	-	-	-	-	-	C	C	G	A	G	C	G	T	C	-	-	-	-	-	-	-	-	-	-	-	-	-	-	-	A	T	T	G	C	T	G	C	C	C
J78	-	-	-	-	-	-	-	-	-	-	-	-	-	-	-	M	Y	K	A	K	C	G	T	C	-	-	-	-	-	-	-	-	-	-	-	-	-	-	-	A	T	T	G	M	K	K	C	C	C
J79	-	-	-	-	-	-	-	-	-	-	-	-	-	-	-	C	C	G	A	G	C	G	T	C	-	-	-	-	-	-	-	-	-	-	-	-	-	-	-	A	T	T	G	C	T	G	C	C	C
J80	-	-	-	-	-	-	-	-	-	-	-	-	-	-	-	C	C	G	A	G	C	G	T	C	-	-	-	-	-	-	-	-	-	-	-	-	-	-	-	A	T	T	G	C	T	G	C	C	C
J81	-	-	-	-	-	-	-	-	-	-	-	-	-	-	-	C	C	K	A	G	C	G	T	C	-	-	-	-	-	-	-	-	-	-	-	-	-	-	-	A	T	T	S	C	T	S	M	M	C
J82	-	-	-	-	-	-	-	-	-	-	-	-	-	-	-	C	C	G	A	G	C	G	T	C	-	-	-	-	-	-	-	-	-	-	-	-	-	-	-	A	T	T	G	C	T	G	C	C	C
J83	-	-	-	-	-	-	-	-	-	-	-	-	-	-	-	C	C	G	A	G	C	G	T	C	-	-	-	-	-	-	-	-	-	-	-	-	-	-	-	A	T	T	G	C	T	G	C	C	C
J84	-	-	-	-	-	-	-	-	-	-	-	-	-	-	-	C	C	G	A	G	C	G	T	C	-	-	-	-	-	-	-	-	-	-	-	-	-	-	-	A	T	T	G	C	T	G	C	C	C
J85	-	-	-	-	-	-	-	-	-	-	-	-	-	-	-	C	C	G	A	G	C	G	T	C	-	-	-	-	-	-	-	-	-	-	-	-	-	-	-	A	T	T	G	C	T	G	C	C	C
F86	-	-	-	-	-	-	-	-	-	-	-	-	-	-	-	C	C	G	A	G	C	G	T	C	-	-	-	-	-	-	-	-	-	-	-	-	-	-	-	A	T	T	G	C	T	G	C	C	C
KU855474.1	G	T	T	G	C	C	C	-	-	-	-	-	-	C	C	C	T	A	A	G	T	C	C	C	T	T	T	-	-	-	-	-	-	-	-	-	-	-	-	G	A	C	A	C	T	G	T	C	C
	7	7	7	7	7	7	7	7	7	7	7	7	7	7	7	7	7	7	7	8	8	8	8	8	8	8	8	8	8	8	8	8	8	8	8	8	8	8	8	8	8	8	8	8	8	8	8	8	8
	8	8	8	8	8	8	8	8	8	9	9	9	9	9	9	9	9	9	9	0	0	0	0	0	0	0	0	0	0	1	1	1	1	1	1	1	1	1	1	2	2	2	2	2	2	2	2	2	2
	1	2	3	4	5	6	7	8	9	0	1	2	3	4	5	6	7	8	9	0	1	2	3	4	5	6	7	8	9	0	1	2	3	4	5	6	7	8	9	0	1	2	3	4	5	6	7	8	9
Ab1	-	-	-	-	-	-	-	-	-	-	-	-	-	-	-	-	-	-	-	-	-	-	-	-	-	-	-	-	-	-	-	-	-	-	-	-	-	-	-	-	-	-	-	-	-	-	-	-	-
Ab2	G	G	C	C	C	C	C	G	T	C	C	C	C	C	T	-	-	-	-	-	C	C	C	A	G	G	A	A	G	G	G	G	A	C	G	G	G	C	C	-	-	-	-	-	C	G	A	A	A
Ab3	-	-	-	-	-	-	-	-	-	-	-	-	-	-	-	-	-	-	-	-	-	-	-	-	-	-	-	-	-	-	-	-	-	-	-	-	-	-	-	-	-	-	-	-	-	-	-	-	-
Ab4	-	-	-	-	-	-	-	-	-	-	-	-	-	-	-	-	-	-	-	-	-	-	-	-	-	-	-	-	-	-	-	-	-	-	-	-	-	-	-	-	-	-	-	-	-	-	-	-	-
Ab6	-	-	-	-	-	-	-	-	-	-	-	-	-	-	-	-	-	-	-	-	-	-	-	-	-	-	-	-	-	-	-	-	-	-	-	-	-	-	-	-	-	-	-	-	-	-	-	-	-
Ab7	G	G	S	C	C	C	C	C	T	M	C	C	C	C	A	-	-	-	-	T	A	C	C	M	G	G	A	A	A	G	G	G	R	C	G	G	G	G	Y	-	-	-	-	-	C	R	R	A	A
Ab8	G	S	C	C	C	C	C	S	T	C	C	C	C	C	T	-	-	-	-	-	C	C	C	A	G	G	A	A	G	G	G	G	M	C	S	G	G	C	C	-	-	-	-	-	S	G	A	A	A
Ab9	G	G	C	C	C	C	C	G	T	C	C	C	C	C	T	-	-	-	-	-	C	C	C	A	G	G	A	A	G	G	G	G	A	C	G	G	G	C	C	-	-	-	-	-	C	G	A	A	A
Ab10	G	G	C	C	C	C	C	G	T	C	C	C	C	C	T	-	-	-	-	-	C	C	C	A	G	G	A	A	G	G	G	G	A	C	G	G	G	C	C	-	-	-	-	-	C	G	A	A	A
Ab11	C	A	A	C	A	G	G	G	T	A	C	A	A	A	T	A	G	A	-	C	M	M	G	G	A	T	G	G	G	A	G	G	A	C	G	G	A	C	A	C	C	C	C	G	C	G	A	A	G
Ab12	G	G	C	C	C	C	C	G	T	C	C	C	C	C	T	-	-	-	-	-	C	C	C	A	G	G	A	A	G	G	G	G	A	C	G	G	G	C	C	-	-	-	-	-	C	G	A	A	A
Ab13	C	A	M	C	R	G	G	G	M	A	C	M	A	A	T	A	G	R	R	Y	W	C	R	G	A	T	R	G	G	A	G	G	A	C	G	C	C	C	A	C	C	C	C	C	C	C	A	A	G
Ab14	G	G	S	C	C	M	C	G	T	C	C	C	C	G	W	Y	T	K	T	G	R	R	C	G	G	G	C	C	C	G	G	G	A	M	R	G	G	C	C	-	-	-	-	-	Y	C	R	R	A
G16	G	G	C	C	C	C	C	G	T	C	C	C	C	C	T	-	-	-	-	-	C	C	C	A	G	G	A	A	G	G	G	G	A	C	G	G	G	C	C	-	-	-	-	-	Y	G	A	A	A
G17	G	G	C	C	C	C	C	K	T	M	C	C	C	C	T	-	-	-	-	-	C	C	C	A	G	G	A	A	G	G	R	R	A	S	G	G	G	C	C	-	-	-	-	-	C	S	A	A	A
Ab19	G	G	C	C	C	C	C	G	T	C	C	C	C	C	T	-	-	-	-	-	C	C	C	A	G	G	A	A	G	G	G	G	A	C	G	G	G	C	C	-	-	-	-	-	C	G	A	A	A
Ab20	G	G	C	C	C	C	C	S	T	C	C	C	C	C	T	-	-	-	-	-	C	C	C	A	G	G	A	A	G	G	G	G	A	C	G	G	G	S	C	-	-	-	-	-	M	K	A	A	A
Ab21	G	G	M	C	C	C	C	G	T	C	C	C	C	C	T	-	-	-	-	-	C	C	C	R	G	G	A	A	S	G	G	G	A	C	K	G	K	C	G	-	-	-	-	-	S	M	R	A	A
B22	G	G	C	C	C	C	C	K	T	C	C	C	C	C	Y	-	-	-	-	-	C	C	C	M	G	R	A	A	R	G	G	G	A	C	G	G	S	C	C	-	-	-	-	-	C	A	R	A	A
B24	G	G	C	C	C	C	C	G	T	C	C	C	C	C	T	G	-	-	-	-	T	T	C	T	A	G	G	G	G	G	G	G	A	C	G	G	G	C	C	-	-	-	-	-	C	G	A	A	A
B25	G	G	C	C	C	C	C	G	T	C	C	C	C	C	T	-	-	-	-	-	C	C	C	A	G	G	A	A	G	G	G	G	A	C	G	G	G	C	C	-	-	-	-	-	C	G	A	A	A
B26	G	G	C	C	C	C	C	G	T	C	C	C	C	C	T	-	-	-	-	-	C	C	C	A	G	G	A	A	G	G	G	G	A	C	G	G	G	C	C	-	-	-	-	-	C	G	A	A	A
B27	G	G	C	C	C	C	C	G	T	C	C	C	C	C	T	-	-	-	-	-	C	C	C	A	G	G	A	A	G	G	G	G	A	C	G	G	G	C	C	-	-	-	-	-	C	G	A	A	A
B28	G	G	C	C	C	C	C	G	T	C	C	C	C	C	C	-	-	-	-	-	C	C	-	-	-	-	A	A	G	G	G	G	A	M	G	G	G	C	C	-	-	-	-	-	C	G	A	A	A
B29	G	G	C	C	C	C	C	G	T	C	C	C	G	G	C	G	A	A	G	C	A	T	C	A	G	C	C	C	C	G	G	G	A	C	G	G	G	C	C	-	-	-	-	-	C	G	A	A	A
B30	G	C	C	C	C	C	S	T	C	C	C	C	C	Y	C	-	-	-	-	-	C	C	A	C	R	G	A	R	G	G	G	G	A	C	R	G	G	C	C	-	-	-	-	-	C	R	A	A	A
B32	G	G	C	C	C	C	C	G	T	C	C	C	C	C	C	-	-	-	-	-	C	C	-	-	-	-	A	A	G	G	G	G	A	C	G	G	G	C	C	-	-	-	-	-	C	G	A	A	A
B33	G	G	C	C	C	C	C	G	T	C	C	C	C	C	T	-	-	-	-	-	C	C	C	A	G	G	A	A	G	G	G	G	A	C	G	G	G	C	C	-	-	-	-	-	C	G	A	A	A
B34	G	G	C	C	C	C	C	S	Y	C	C	C	C	C	T	-	-	-	-	-	C	C	C	A	G	K	A	M	S	G	G	G	A	S	G	G	G	C	C	-	-	-	-	-	C	G	A	A	A
B35	G	G	C	C	C	C	C	G	T	C	C	C	C	C	T	-	-	-	-	-	C	C	C	A	G	G	A	A	R	G	G	S	M	C	G	G	K	M	C	-	-	-	-	-	C	G	A	A	A
B36	G	G	C	C	C	C	C	G	T	C	C	C	C	C	T	-	-	-	-	-	Y	C	C	A	S	G	A	A	G	G	G	G	A	C	G	G	G	S	M	-	-	-	-	-	C	G	A	A	A
B37	G	G	C	C	C	C	C	G	T	C	C	C	C	C	T	-	-	-	-	-	C	C	C	A	G	G	A	A	G	G	G	G	A	C	G	G	G	C	C	-	-	-	-	-	C	G	A	A	A
B38	G	G	C	C	C	C	C	G	T	C	C	C	C	C	T	-	-	-	-	-	C	C	C	A	G	G	A	A	G	G	G	G	A	C	G	G	G	S	C	-	-	-	-	-	S	G	A	A	A
B39	G	C	C	C	C	C	A	S	Y	C	C	C	R	R	W	-	-	-	-	T	C	T	Y	T	A	A	G	C	C	G	G	G	A	C	G	G	G	C	C	G	T	C	C	C	C	S	A	A	A
B41	G	G	C	C	C	C	C	G	T	C	C	C	C	C	T	-	-	-	-	-	C	C	C	A	G	G	A	A	G	G	G	G	R	C	G	G	G	C	C	-	-	-	-	-	M	G	A	A	A
B42	G	G	C	C	C	C	C	G	T	C	C	C	C	C	C	-	-	-	-	-	C	C	-	-	-	-	A	A	G	G	G	G	A	C	G	G	G	C	C	-	-	-	-	-	C	G	A	A	A
B43	G	G	C	C	C	C	C	K	T	C	C	C	G	G	M	R	A	R	R	C	A	Y	C	R	G	C	C	C	C	G	R	G	A	C	R	G	G	C	C	-	-	-	-	-	C	G	A	A	A
B44	G	G	C	C	C	C	C	G	T	C	C	C	C	C	T	-	-	-	-	-	C	C	C	A	G	G	A	A	G	G	G	G	A	C	G	G	G	C	C	-	-	-	-	-	C	G	A	A	A
D48	G	G	C	C	C	C	C	G	T	C	C	C	C	C	T	-	-	-	-	-	C	C	C	A	G	G	A	A	G	G	G	G	A	C	G	G	G	C	C	-	-	-	-	-	C	G	A	A	A
D49	G	G	C	C	C	C	C	G	T	C	C	C	G	G	C	G	A	A	G	C	A	T	C	A	G	C	C	C	C	G	G	G	A	C	G	G	G	C	C	-	-	-	-	-	C	G	A	A	A
D50	G	G	C	C	C	C	C	G	T	C	C	C	G	G	C	G	A	A	G	C	A	T	C	A	G	C	C	C	C	G	G	G	A	C	G	G	G	C	C	-	-	-	-	-	C	G	A	A	A
D51	G	C	C	C	C	C	S	G	T	C	S	C	G	G	K	-	-	-	-	T	C	T	Y	C	M	M	-	C	C	R	G	G	R	C	G	G	R	C	C	-	-	-	-	C	-	G	A	A	A
D52	G	G	C	C	C	C	C	G	T	C	C	C	G	G	C	G	A	A	G	C	A	T	C	A	G	C	C	C	C	G	G	G	A	C	G	G	G	C	C	-	-	-	-	-	C	G	A	A	A
D53	G	G	C	C	C	C	C	G	T	C	C	C	C	C	T	-	-	-	-	-	C	C	C	A	G	G	A	A	G	G	G	G	A	C	G	G	G	C	C	-	-	-	-	-	C	G	A	A	A
D54	G	G	C	C	C	C	C	G	T	C	C	C	C	C	T	-	-	-	-	-	C	C	C	A	G	G	A	A	G	G	G	G	A	C	G	G	G	C	C	-	-	-	-	-	C	G	A	A	A
D55	C	A	A	C	A	G	G	G	W	A	C	A	A	A	T	A	G	A	-	C	A	C	G	G	A	T	G	G	G	A	G	G	A	C	G	G	A	C	A	C	C	C	C	G	A	G	A	A	G
D56	G	T	C	C	C	C	Y	G	T	C	C	C	G	G	C	-	-	-	-	Y	C	T	C	C	A	C	-	S	C	G	G	R	R	S	G	G	G	M	C	-	-	-	-	C	A	R	A	A	A
E57	G	G	C	C	C	C	C	G	T	C	C	C	G	G	C	G	A	A	G	C	A	T	C	A	G	C	C	C	C	G	G	G	A	C	G	G	G	C	C	-	-	-	-	-	C	G	A	A	A
E58	G	G	C	C	C	C	C	G	T	C	C	C	G	G	C	G	A	A	G	C	A	T	C	A	G	C	C	C	C	G	G	G	A	C	G	G	G	C	C	-	-	-	-	-	C	G	A	A	A
F59	G	G	C	C	C	C	C	G	T	C	C	C	G	G	M	G	A	A	G	C	A	T	C	A	G	C	C	C	C	G	G	G	A	C	G	G	G	C	C	-	-	-	-	-	C	G	A	A	A
F60	G	S	C	T	T	C	C	G	T	C	C	C	T	G	G	-	-	-	-	-	-	-	T	A	R	-	-	C	G	G	G	G	A	C	G	G	G	Y	C	-	-	-	-	-	C	A	A	A	A
F61	G	C	C	C	C	C	C	G	T	C	C	C	G	G	T	-	-	-	-	T	C	T	C	C	A	-	G	C	C	G	G	G	A	C	G	G	G	C	C	-	-	-	-	-	C	G	A	A	A
F62	G	G	A	C	R	G	T	A	G	T	S	R	A	R	S	T	C	R	A	M	G	C	C	G	G	C	A	Y	G	A	W	K	T	Y	S	R	C	T	Y	A	T	C	G	A	C	C	G	W	A
F63	G	G	C	C	C	C	C	G	T	C	C	C	G	G	C	K	A	A	G	C	A	T	C	A	G	C	C	C	C	G	G	G	A	C	G	G	G	C	C	-	-	-	-	-	C	G	A	A	A
G64	G	G	C	C	C	C	C	G	T	C	C	C	G	G	C	G	A	A	G	C	A	T	C	A	G	C	C	C	C	G	G	G	A	C	G	G	G	C	C	-	-	-	-	-	C	G	A	A	A
G65	G	G	C	C	C	C	C	G	T	C	C	Y	C	C	T	-	-	-	-	-	C	C	C	A	G	G	A	A	K	G	G	G	A	C	G	G	G	C	Y	-	-	-	-	-	C	G	A	W	A
G66	G	G	C	C	C	C	C	G	T	C	C	C	C	C	T	-	-	-	-	-	C	C	C	A	G	G	A	A	G	G	G	G	A	C	G	G	G	C	C	-	-	-	-	-	C	G	A	A	A
G67	G	Y	C	C	C	C	C	S	T	C	C	C	G	G	Y	-	-	-	-	Y	C	T	C	C	A	S	-	C	C	G	G	G	R	C	G	G	G	C	C	-	-	-	-	C	-	R	A	A	A
G68	G	G	C	C	C	C	C	G	T	C	C	C	G	G	C	G	A	A	G	C	A	T	C	A	G	C	C	C	C	G	G	G	A	C	G	G	G	C	C	-	-	-	-	-	C	G	A	A	A
G69	G	G	C	C	C	C	C	G	T	C	C	C	C	C	T	-	-	-	-	-	C	C	C	A	G	G	A	A	G	G	G	G	A	C	G	G	G	C	C	-	-	-	-	-	C	G	A	A	A
G70	G	G	C	C	C	C	C	G	T	C	C	C	G	G	M	G	A	A	G	C	A	T	C	A	G	C	C	C	C	G	G	G	A	C	G	G	G	C	C	-	-	-	-	-	M	G	A	A	A
J74	G	T	C	C	C	C	C	G	T	C	C	C	G	G	Y	-	-	-	-	T	C	T	C	C	A	-	S	C	C	G	G	G	A	C	G	G	G	C	C	-	-	-	-	-	C	G	A	A	A
J76	G	G	C	C	C	C	C	G	T	C	C	C	G	G	C	G	A	A	G	C	A	T	C	A	G	C	C	C	C	G	G	G	A	C	G	G	G	C	C	-	-	-	-	-	C	G	A	A	A
J77	G	G	C	C	C	C	C	G	T	C	C	C	G	G	C	G	A	A	G	C	A	T	C	A	G	C	C	C	C	G	G	G	A	C	G	G	G	C	C	-	-	-	-	-	C	G	A	A	A
J78	G	K	C	C	C	C	C	G	T	C	C	C	C	C	T	-	-	-	-	-	C	C	C	A	G	G	A	A	R	G	G	G	A	C	G	G	G	Y	C	-	-	-	-	-	M	K	A	A	A
J79	G	G	C	C	C	C	C	G	T	C	C	C	C	C	Y	-	-	-	-	-	C	C	C	A	G	G	A	A	G	G	G	G	A	C	G	G	G	C	C	-	-	-	-	-	C	G	A	A	A
J80	G	C	C	C	C	C	-	G	T	C	C	C	G	G	T	-	-	-	-	T	C	T	C	C	A	A	G	C	C	G	G	G	A	C	G	G	G	C	C	-	-	-	-	-	C	G	A	A	A
J81	G	G	C	C	C	C	C	G	T	C	C	C	C	C	T	-	-	-	-	-	C	C	C	A	G	G	A	A	G	G	G	G	M	C	G	G	R	M	M	-	-	-	-	-	S	G	A	A	A
J82	G	G	C	C	C	C	C	G	T	C	C	C	C	C	T	-	-	-	-	-	C	C	C	A	G	G	A	A	G	G	G	G	A	C	G	G	G	C	C	-	-	-	-	-	C	G	A	A	A
J83	G	G	C	C	C	C	C	G	T	C	C	C	C	C	T	-	-	-	-	-	C	C	C	A	G	G	A	A	G	G	G	G	A	C	G	G	G	C	C	-	-	-	-	-	C	G	A	A	A
J84	G	G	C	C	C	C	C	G	T	C	C	C	C	C	T	-	-	-	-	-	C	C	C	A	G	G	A	A	G	G	G	G	A	C	G	G	G	C	C	-	-	-	-	-	C	G	A	A	A
J85	G	G	C	C	C	C	C	G	T	C	C	C	C	C	T	-	-	-	-	-	C	C	C	A	G	G	A	A	G	G	G	G	A	C	G	G	G	C	C	-	-	-	-	-	C	G	A	A	A
F86	G	G	C	C	C	C	C	G	T	C	C	C	C	C	C	-	-	-	-	-	C	C	-	-	-	-	A	A	G	G	G	G	A	C	G	G	G	C	C	-	-	-	-	-	C	G	A	A	A
KU855474.1	G	A	T	G	A	T	G	G	C	C	T	C	C	C	G	T	G	G	G	C	C	T	C	G	A	C	T	C	G	C	G	G	T	T	G	G	T	C	T	A	A	A	T	T	T	G	G	G	T
	8	8	8	8	8	8	8	8	8	8	8	8	8	8	8	8	8	8	8	8	8	8	8	8	8	8	8	8	8	8	8	8	8	8	8	8	8	8	8	8	8	9	9	9	9	9	9	9	9
	5	6	6	6	6	6	6	6	6	6	6	7	7	7	7	7	7	7	7	7	7	8	8	8	8	8	8	8	8	8	8	9	9	9	9	9	9	9	9	9	9	0	0	0	0	0	0	0	0
	9	0	1	2	3	4	5	6	7	8	9	0	1	2	3	4	5	6	7	8	9	0	1	2	3	4	5	6	7	8	9	0	1	2	3	4	5	6	7	8	9	0	1	2	3	4	5	6	7
Ab1	-	-	-	-	-	-	-	-	-	-	-	-	-	-	-	-	-	-	-	-	-	-	-	-	-	-	-	-	-	-	-	-	-	-	-	-	-	-	-	-	-	-	-	-	-	-	-	-	-
Ab2	-	-	-	C	A	G	C	G	G	C	G	G	C	A	C	C	-	-	G	Y	G	T	C	C	G	G	T	C	C	T	C	-	R	A	G	C	G	T	A	T	G	G	G	A	A	G	C	A	A
Ab3	-	-	-	-	-	-	-	-	-	-	-	-	-	-	-	-	-	-	-	-	-	-	-	-	-	-	-	-	-	-	-	-	-	-	-	-	-	-	-	-	-	-	-	-	-	-	-	-	-
Ab4	-	-	-	-	-	-	-	-	-	-	-	-	-	-	-	-	-	-	-	-	-	-	-	-	-	-	-	-	-	-	-	-	-	-	-	-	-	-	-	-	-	-	-	-	-	-	-	-	-
Ab6	-	-	-	-	-	-	-	-	-	-	-	-	-	-	-	-	-	-	-	-	-	-	-	-	-	-	-	-	-	-	-	-	-	-	-	-	-	-	-	-	-	-	-	-	-	-	-	-	-
Ab7	-	-	-	S	C	G	C	A	K	K	A	C	A	G	M	Y	-	-	M	M	K	G	S	M	C	G	T	A	C	C	C	G	A	A	C	S	K	T	W	T	G	S	A	R	R	C	C	W	A
Ab8	-	-	-	C	A	G	S	G	G	S	G	G	C	R	C	C	-	-	G	T	G	T	C	C	G	G	T	C	M	T	C	-	G	A	R	C	G	T	A	W	G	G	G	A	A	G	C	A	C
Ab9	-	-	-	S	A	G	C	G	G	M	G	G	C	A	C	C	-	-	G	Y	G	T	C	C	G	G	Y	C	C	T	C	-	G	A	G	C	G	K	A	T	G	G	G	A	A	G	C	M	G
Ab10	-	-	-	C	A	G	C	G	G	C	G	G	C	A	C	C	-	-	G	T	G	T	C	C	G	G	T	C	C	T	C	-	G	A	G	C	G	T	A	T	G	G	G	A	A	G	C	A	A
Ab11	-	-	-	-	-	G	C	A	T	C	C	A	A	A	C	A	-	-	C	T	C	G	G	Y	A	A	T	G	A	T	C	C	T	T	C	C	G	C	A	G	G	T	T	C	A	C	C	T	A
Ab12	A	G	G	Y	A	G	C	G	G	C	G	G	C	A	C	C	-	-	G	T	G	T	C	C	G	G	T	C	C	T	C	-	G	A	G	C	G	T	A	C	-	-	-	-	-	-	-	-	-
Ab13	-	-	-	-	-	G	G	A	T	C	C	T	G	A	C	C	-	-	C	T	C	C	C	G	C	A	T	G	A	T	C	T	G	G	G	A	G	G	A	C	G	C	C	C	A	C	C	C	C
Ab14	-	-	-	M	R	Y	C	K	Y	C	G	G	R	W	C	C	-	-	K	K	T	C	C	C	A	A	G	M	S	K	M	A	C	C	T	S	C	A	A	W	G	G	T	A	G	-	-	-	-
G16	-	-	-	C	A	G	C	G	G	C	G	G	C	A	C	C	-	-	G	T	G	T	C	C	G	G	T	C	C	T	C	-	G	A	G	C	G	T	A	T	G	G	G	A	A	R	C	A	A
G17	-	-	-	-	A	S	C	G	G	C	G	G	C	A	C	M	-	-	C	G	G	K	C	C	G	G	T	C	C	T	C	W	A	A	G	-	G	T	A	T	G	G	G	A	A	S	C	A	A
Ab19	-	-	-	C	A	G	C	G	G	C	G	G	C	A	C	C	-	-	G	T	G	T	C	C	G	G	T	C	C	T	C	-	G	A	G	C	G	T	A	T	G	G	G	A	A	G	C	A	A
Ab20	-	-	-	M	A	R	C	G	G	C	G	G	M	A	C	C	-	-	G	T	G	T	C	C	G	G	T	C	C	T	C	-	R	A	G	M	G	T	A	T	G	G	G	A	A	S	C	A	A
Ab21	-	-	-	T	W	Y	C	G	C	C	A	A	A	T	C	C	-	-	G	W	G	T	C	C	G	G	W	C	C	K	C	S	A	C	G	C	G	T	A	K	G	G	R	A	A	S	C	M	K
B22	-	-	-	C	A	G	S	G	G	S	G	G	C	M	C	C	-	-	G	T	G	T	C	S	G	G	C	T	C	C	T	M	G	A	G	C	R	T	A	T	G	G	G	A	A	R	C	A	A
B24	-	-	-	C	A	G	C	G	G	C	G	G	C	A	C	C	-	-	G	T	G	T	C	C	G	G	T	C	C	T	C	-	G	A	G	C	G	T	A	T	G	G	G	A	A	G	C	A	A
B25	-	-	-	C	A	G	C	G	G	C	G	G	C	A	C	C	-	-	G	T	G	T	C	C	G	G	T	C	C	T	C	-	G	A	G	C	G	T	A	T	G	G	G	A	A	G	C	A	A
B26	-	-	-	C	A	R	C	G	G	S	G	G	C	A	C	C	-	-	G	T	G	T	C	C	G	G	T	C	C	T	C	-	G	A	G	C	G	T	A	T	G	G	G	A	A	G	C	A	A
B27	-	-	-	C	A	G	C	G	G	C	G	G	C	A	C	C	-	-	G	T	G	T	C	C	G	G	T	C	C	T	C	-	G	A	G	C	G	T	A	T	G	G	G	A	A	G	C	A	A
B28	-	-	-	M	A	G	C	G	G	C	G	G	C	A	C	C	-	-	G	T	G	T	C	C	G	G	T	C	C	T	C	-	G	A	G	C	G	T	A	T	G	G	G	A	A	G	C	A	A
B29	-	-	-	C	A	G	C	G	G	C	G	G	C	A	C	C	-	-	G	T	G	T	C	C	G	G	T	C	C	T	C	-	G	A	G	C	G	T	A	T	G	G	G	G	-	-	-	-	-
B30	-	-	-	C	A	G	C	G	G	R	G	R	C	A	C	C	-	-	G	K	S	T	C	C	R	S	-	T	C	Y	Y	C	G	A	R	Y	G	T	A	T	R	G	G	A	A	R	M	A	A
B32	-	-	-	C	A	G	C	G	G	C	G	G	C	A	C	C	-	-	G	T	G	T	C	C	G	G	T	C	C	T	C	-	G	A	G	C	G	T	A	T	G	G	G	A	A	G	C	A	A
B33	-	-	-	C	A	G	C	G	G	C	G	G	C	A	C	C	-	-	G	T	G	T	C	C	G	G	T	C	C	T	C	C	G	A	G	C	G	T	A	T	G	G	G	A	A	G	C	A	A
B34	-	-	-	C	A	R	C	G	G	C	S	G	S	R	C	C	-	-	S	Y	G	W	C	C	G	K	W	Y	S	K	S	-	G	A	Y	C	K	K	A	W	G	G	G	A	A	S	Y	M	A
B35	-	-	-	R	G	C	C	C	T	C	S	A	R	M	S	C	-	-	A	W	G	K	S	C	G	G	T	C	C	T	C	-	R	A	S	Y	G	T	A	K	G	G	K	A	A	G	C	A	A
B36	-	-	-	C	A	R	M	G	G	C	R	G	C	R	C	C	-	-	G	Y	S	Y	C	C	G	G	T	C	C	T	C	S	R	A	C	C	T	T	A	W	G	G	G	A	A	R	C	A	A
B37	-	-	-	C	A	G	C	G	G	C	G	G	C	A	C	C	-	-	G	T	G	T	C	C	C	C	C	C	T	C	C	-	C	A	G	G	A	A	G	G	G	G	A	C	G	G	G	C	C
B38	-	-	-	C	A	G	C	G	G	C	G	G	G	A	C	C	G	S	G	T	G	T	C	C	G	G	T	C	C	T	C	-	G	A	G	C	G	T	A	T	G	G	G	A	A	G	C	A	A
B39	-	-	-	C	A	K	T	G	G	C	G	G	T	A	C	C	-	-	T	A	A	T	C	C	S	G	Y	C	M	T	C	-	Y	T	S	S	R	W	A	T	G	G	K	R	-	-	-	-	-
B41	-	-	-	C	A	G	C	G	G	C	G	G	C	R	C	C	-	-	G	T	G	T	C	C	G	G	T	C	Y	T	C	-	G	A	G	C	G	T	A	T	G	G	G	A	A	G	C	A	A
B42	-	-	-	C	A	G	C	G	G	C	G	G	C	A	C	C	-	-	G	T	G	T	C	C	G	G	T	C	C	T	C	-	G	A	G	C	G	T	A	T	G	G	G	A	A	G	C	A	A
B43	-	-	-	S	A	G	S	G	C	S	G	G	K	C	M	C	-	-	G	G	S	T	C	C	G	R	T	C	C	T	M	-	R	A	G	W	G	Y	A	T	G	G	G	K	-	-	-	-	-
B44	-	-	-	C	A	G	C	G	G	C	G	G	C	A	C	C	-	-	G	T	G	T	C	C	G	G	T	C	C	T	C	-	G	A	G	C	G	T	A	T	G	G	G	A	A	G	C	A	A
D48	-	-	-	C	A	G	C	G	G	C	G	G	C	A	C	C	-	-	G	T	G	T	C	C	G	G	T	C	C	T	C	-	G	A	G	C	G	T	A	T	G	G	G	A	A	G	C	A	A
D49	-	-	-	C	A	G	C	G	G	C	G	G	S	A	C	C	-	-	G	T	G	T	C	C	G	G	T	C	C	T	C	-	G	A	G	C	G	T	A	T	G	G	G	G	-	-	-	-	-
D50	-	-	-	C	A	G	C	G	G	C	G	G	C	A	C	C	-	-	G	T	G	T	C	C	G	G	T	C	C	T	C	-	G	A	G	C	G	T	A	T	G	G	G	G	-	-	-	-	-
D51	-	-	-	M	M	G	M	S	M	S	G	R	M	A	M	Y	-	-	S	Y	S	Y	C	C	G	G	S	C	C	S	M	-	S	A	G	Y	G	K	R	K	G	G	G	G	-	-	-	-	-
D52	-	-	-	C	A	G	C	G	G	C	G	G	C	A	C	C	-	-	G	T	G	T	C	C	G	G	T	C	C	T	C	-	G	A	G	C	G	T	A	T	G	G	G	G	-	-	-	-	-
D53	-	-	-	C	A	G	C	G	G	C	G	G	C	R	C	C	-	-	G	T	G	T	C	C	G	G	T	C	C	T	C	-	G	A	G	C	G	T	A	T	G	G	G	A	A	G	C	A	A
D54	-	-	-	C	A	G	C	G	G	C	G	G	C	R	C	C	-	-	G	T	G	T	C	C	G	G	T	C	C	T	C	-	G	A	G	C	G	T	A	T	G	G	G	A	A	G	C	A	A
D55	-	-	-	-	-	G	C	A	T	C	C	A	A	A	C	A	-	-	C	T	C	G	G	T	A	A	T	G	A	T	C	C	T	T	C	C	G	C	A	G	G	T	T	C	A	C	C	T	A
D56	-	-	-	S	A	G	C	S	G	Y	R	G	M	R	C	C	-	-	G	T	G	T	C	C	G	M	W	C	C	T	M	-	G	A	G	Y	R	K	A	T	G	G	G	G	-	-	-	-	-
E57	-	-	-	C	A	G	C	G	G	C	G	G	C	A	C	C	-	-	G	T	G	T	C	C	G	G	T	C	C	T	C	-	G	A	G	C	G	T	A	T	G	G	G	G	-	-	-	-	-
E58	-	-	-	C	A	G	C	G	G	C	G	G	C	A	C	C	-	-	G	T	G	T	C	C	G	G	T	C	C	T	C	-	G	A	G	C	G	T	A	T	G	G	G	G	-	-	-	-	-
F59	-	-	-	C	M	S	C	G	G	C	G	S	S	A	C	C	-	-	G	T	G	T	Y	C	S	G	T	Y	C	T	C	-	G	A	G	S	G	T	A	T	G	G	K	G	-	-	-	-	-
F60	-	-	-	M	A	G	K	G	K	C	G	G	C	M	Y	C	-	-	A	T	G	T	C	Y	G	G	T	C	C	T	C	-	G	A	S	C	G	T	A	T	G	G	G	G	-	-	-	-	-
F61	-	-	-	C	A	G	C	G	G	C	G	G	C	A	C	C	-	-	G	T	G	T	C	C	G	G	T	C	C	T	C	-	G	A	G	T	G	T	A	T	G	G	G	G	-	-	-	-	-
F62	T	T	S	Y	T	A	M	G	C	C	G	G	C	A	Y	G	-	-	A	W	K	T	Y	S	R	C	T	Y	A	T	C	-	G	A	C	C	G	W	A	C	G	R	T	S	T	-	-	-	-
F63	-	-	-	C	A	G	C	G	G	C	G	G	C	A	C	C	C	T	G	T	G	T	C	C	G	G	T	C	C	-	-	-	G	A	G	C	G	T	A	T	G	G	G	G	-	-	-	-	-
G64	-	-	-	C	A	G	C	G	G	C	G	G	C	A	C	C	-	-	G	T	G	T	C	C	G	G	T	C	C	T	C	-	G	A	G	C	G	T	A	T	G	G	G	G	-	-	-	-	-
G65	-	-	-	C	A	G	C	G	G	C	G	G	C	A	C	C	-	-	G	T	G	W	C	C	G	G	T	C	C	T	C	-	G	A	G	C	G	T	A	T	G	G	G	A	A	G	C	W	W
G66	-	-	-	C	A	G	C	G	G	C	G	G	C	A	C	C	-	-	G	T	G	T	C	C	G	G	T	C	C	T	C	-	G	A	G	C	G	T	A	T	G	G	G	A	A	G	C	A	A
G67	-	-	-	M	A	G	M	G	G	G	G	G	M	A	C	C	-	-	G	K	G	T	C	C	G	S	Y	C	C	T	M	-	G	A	G	K	G	T	A	T	G	G	G	G	-	-	-	-	-
G68	-	-	-	C	A	G	C	G	G	C	G	G	C	A	C	C	-	-	G	T	G	T	C	C	G	G	T	C	C	T	C	-	G	A	G	C	G	T	A	T	G	G	G	G	-	-	-	-	-
G69	-	-	-	C	A	G	C	G	G	C	G	G	C	A	C	C	-	-	G	T	G	T	C	C	G	G	T	C	C	T	C	-	G	A	G	C	G	T	A	T	G	G	G	A	A	G	C	A	A
G70	-	-	-	C	A	K	C	G	G	C	G	G	Y	A	C	C	-	-	G	T	G	T	C	C	G	G	T	C	C	T	C	-	R	A	G	S	G	T	A	T	G	G	G	K	-	-	-	-	-
J74	-	-	-	C	A	G	C	G	G	C	G	G	C	A	C	C	-	-	G	T	G	T	C	C	G	G	T	C	C	T	M	-	G	A	G	T	G	T	A	T	G	G	G	G	-	-	-	-	-
J76	-	-	-	C	A	G	C	G	G	C	G	G	C	A	C	C	-	-	G	T	G	T	C	C	G	G	T	C	C	T	C	-	G	A	G	C	G	T	A	T	G	G	G	G	-	-	-	-	-
J77	-	-	-	C	A	G	C	G	G	C	G	G	C	A	C	C	-	-	G	T	G	T	C	C	G	G	T	C	C	T	C	-	G	A	G	C	G	T	A	T	G	G	G	G	-	-	-	-	-
J78	-	-	-	S	A	S	S	G	K	M	S	G	Y	W	C	C	-	-	G	Y	G	T	C	C	G	G	T	C	M	T	C	-	G	A	R	W	G	T	A	T	G	G	K	A	A	S	C	A	A
J79	-	-	-	C	A	G	C	G	G	C	G	G	C	A	C	C	-	-	G	T	G	T	C	C	G	G	T	C	C	T	C	-	G	A	G	C	G	T	A	T	G	G	G	A	A	R	C	A	A
J80	-	-	-	C	A	G	C	G	G	C	G	G	C	A	C	C	-	-	G	T	G	T	C	C	G	G	T	C	C	T	C	-	G	A	G	T	G	T	A	T	G	G	G	G	-	-	-	-	-
J81	-	-	-	C	A	G	S	G	G	C	G	G	C	R	Y	C	-	-	G	T	G	T	C	C	G	G	T	C	C	T	C	-	G	A	G	C	G	T	A	W	G	G	G	A	A	G	C	A	A
J82	-	-	-	C	A	G	C	G	G	C	G	G	C	A	C	C	-	-	G	T	G	T	C	C	G	G	T	C	C	T	C	-	G	A	G	C	G	T	A	T	G	G	G	A	A	G	C	A	A
J83	-	-	-	C	A	G	C	G	G	C	G	G	C	A	C	C	-	-	G	T	G	T	C	C	G	G	T	C	C	T	C	-	G	A	G	C	G	T	A	T	G	G	G	A	A	G	C	A	A
J84	-	-	-	C	A	G	C	G	G	C	G	G	C	A	C	C	-	-	G	T	G	T	C	C	G	G	T	C	C	T	C	-	G	A	G	C	G	T	A	T	G	G	G	A	A	G	C	A	A
J85	-	-	-	C	A	G	C	G	G	C	G	G	C	A	C	C	-	-	G	T	G	T	C	C	G	G	T	C	C	T	C	-	G	A	G	C	G	T	A	T	G	G	G	A	A	G	C	A	A
F86	-	-	-	C	A	G	C	G	G	C	G	G	C	A	C	C	-	-	G	T	G	T	C	C	G	G	T	C	C	T	C	-	G	A	G	C	G	T	A	T	G	G	G	A	A	G	C	A	A
KU855474.1	-	-	-	C	G	G	C	A	G	C	C	G	T	G	G	C	A	-	A	C	A	G	G	T	G	G	T	C	G	T	C	-	G	A	T	G	A	T	T	C	G	G	T	G	C	C	C	T	G
	9	9	9	9	9	9	9	9	9	9	9	9	9	9	9	9	9	9	9	9	9	9	9	9	9	9	9	9	9	9	9	9	9	9	9	9	9	9	9	9	9	9	9	9	9	9	9	9	9
	3	3	3	4	4	4	4	4	4	4	4	4	4	5	5	5	5	5	5	5	5	5	5	6	6	6	6	6	6	6	6	6	6	7	7	7	7	7	7	7	7	7	7	8	8	8	8	8	8
	7	8	9	0	1	2	3	4	5	6	7	8	9	0	1	2	3	4	5	6	7	8	9	0	1	2	3	4	5	6	7	8	9	0	1	2	3	4	5	6	7	8	9	0	1	2	3	4	5
Ab1	-	-	-	-	-	-	-	-	-	-	-	-	-	-	-	-	-	-	-	-	-	-	-	-	-	-	-	-	-	-	-	-	-	-	-	-	-	-	-	-	-	-	-	-	-	-	-	-	-
Ab2	-	-	-	-	-	-	-	-	-	T	T	T	T	-	-	-	G	T	-	C	A	C	C	C	G	C	T	C	-	C	T	G	T	A	G	G	T	C	C	G	G	C	C	G	G	-	-	C	G
Ab3	-	-	-	-	-	-	-	-	-	-	-	-	-	-	-	-	-	-	-	-	-	-	-	-	-	-	-	-	-	-	-	-	-	-	-	-	-	-	-	-	-	-	-	-	-	-	-	-	-
Ab4	-	-	-	-	-	-	-	-	-	-	-	-	-	-	-	-	-	-	-	-	-	-	-	-	-	-	-	-	-	-	-	-	-	-	-	-	-	-	-	-	-	-	-	-	-	-	-	-	-
Ab6	-	-	-	-	-	-	-	-	-	-	-	-	-	-	-	-	-	-	-	-	-	-	-	-	-	-	-	-	-	-	-	-	-	-	-	-	-	-	-	-	-	-	-	-	-	-	-	-	-
Ab7	-	-	-	-	-	-	-	-	-	K	T	W	W	-	-	-	-	W	C	W	C	C	C	T	G	C	T	C	T	W	G	A	G	A	R	G	Y	C	C	G	G	C	C	G	G	-	-	M	G
Ab8	C	G	G	M	M	G	C	A	A	C	T	T	T	T	T	C	-	W	-	C	M	C	C	C	Y	C	T	C	-	C	T	G	T	A	G	G	K	S	C	G	G	G	C	G	G	-	-	S	G
Ab9	-	G	G	A	A	G	C	A	A	Y	T	T	T	T	T	T	G	T	-	C	A	C	C	C	G	C	T	C	-	C	T	G	T	A	G	G	T	C	C	G	G	C	C	G	G	-	-	C	G
Ab10	-	-	-	-	-	-	-	-	-	T	T	T	T	-	-	T	G	T	-	C	A	C	C	C	G	C	T	C	-	C	T	G	T	A	G	G	T	C	C	G	G	C	C	G	G	-	-	C	G
Ab11	-	-	-	-	-	-	-	-	-	-	-	-	-	-	-	-	-	-	-	T	G	A	T	C	C	T	T	C	-	-	C	G	C	A	G	G	T	W	C	A	C	C	T	A	C	G	G	A	A
Ab12	-	-	-	-	-	-	-	-	-	T	T	T	T	-	-	T	G	T	-	C	A	C	C	C	G	C	T	C	-	C	T	G	T	A	G	G	K	S	C	G	G	C	C	G	G	-	-	C	G
Ab13	-	-	-	-	-	-	-	-	-	-	C	C	T	C	C	C	K	C	A	K	G	A	T	C	A	T	T	C	-	-	A	G	C	R	R	G	A	Y	C	W	Y	C	T	A	A	G	G	A	A
Ab14	-	-	-	-	-	-	-	-	-	-	-	-	-	W	A	G	G	T	S	A	Y	M	C	C	T	C	G	C	T	G	A	A	T	A	T	G	A	G	S	G	G	T	C	C	G	Y	-	-	-
G16	-	-	-	-	-	-	-	-	-	T	T	T	T	-	-	-	G	T	-	C	A	C	C	C	G	C	T	C	-	C	T	G	T	A	G	G	T	C	C	G	G	C	C	G	G	-	-	C	G
G17	-	-	-	-	-	-	-	-	-	T	T	T	T	T	-	-	G	T	-	C	A	G	T	S	S	C	K	C	-	-	C	R	W	A	G	G	T	A	Y	G	G	C	S	R	R	-	-	C	G
Ab19	-	-	-	-	-	-	-	-	-	T	T	T	T	-	-	-	G	T	-	C	A	C	C	C	G	C	T	C	-	C	T	G	T	A	G	G	T	C	C	G	G	C	C	G	G	-	-	M	G
Ab20	-	-	-	-	-	-	-	-	-	T	T	T	T	-	-	-	G	T	-	C	A	C	C	S	G	S	T	C	-	M	T	G	T	W	G	G	K	C	C	R	G	C	C	G	G	-	-	M	K
Ab21	-	-	-	-	-	-	-	-	-	T	M	S	T	R	-	-	G	K	-	M	A	M	C	C	C	Y	T	C	-	-	C	G	T	A	G	S	S	W	Y	W	G	C	Y	K	G	-	-	Y	G
B22	-	-	-	-	-	-	-	-	-	T	T	T	T	-	-	-	K	T	-	C	A	C	C	T	C	C	T	T	-	C	C	G	G	A	A	G	K	Y	C	S	G	G	C	G	G	G	-	G	G
B24	-	-	-	-	-	-	-	-	-	T	T	T	T	-	-	-	G	T	-	C	A	C	C	C	G	C	T	C	-	C	C	G	T	A	G	G	T	C	C	G	G	C	C	G	G	-	-	C	G
B25	-	-	-	-	-	-	-	-	-	T	T	T	T	-	-	-	G	T	-	C	A	C	C	C	G	C	T	C	-	C	T	G	T	A	G	G	T	C	C	G	G	C	C	G	G	-	-	S	G
B26	-	-	-	-	-	-	-	-	-	T	T	T	T	-	-	-	G	T	-	C	A	C	C	C	G	C	T	C	-	C	T	G	T	A	G	G	K	C	C	G	G	S	C	G	G	-	-	S	G
B27	-	-	-	-	-	-	-	-	-	T	T	T	T	T	-	-	G	T	-	C	A	C	C	C	G	C	T	C	-	C	T	G	T	A	G	G	T	C	C	G	G	C	C	G	G	-	-	C	G
B28	-	-	-	-	-	-	-	-	-	T	T	T	T	T	-	T	G	T	-	C	A	C	C	C	G	C	T	C	-	C	T	G	T	A	G	G	T	C	C	G	G	C	C	G	G	-	-	C	G
B29	-	-	-	-	-	-	-	-	-	C	T	C	T	-	-	-	G	T	-	C	A	C	C	C	G	C	T	C	-	G	T	G	T	A	G	G	T	C	C	G	G	C	C	G	G	-	-	C	G
B30	-	-	-	-	-	-	-	-	-	T	T	T	Y	-	-	-	R	T	-	C	A	C	C	C	G	C	T	C	-	Y	Y	G	T	A	G	G	T	C	C	M	C	C	Y	T	W	T	-	T	G
B32	-	-	-	-	-	-	-	-	-	T	T	T	T	T	-	T	G	T	-	C	A	C	C	C	G	C	T	C	-	C	T	G	T	A	G	G	T	C	C	G	G	C	C	G	G	-	-	C	G
B33	-	-	-	-	-	-	-	-	-	T	T	T	T	T	-	-	G	T	-	C	A	C	C	C	G	C	T	C	-	C	T	G	T	A	G	G	T	C	C	G	G	C	C	G	G	-	-	C	G
B34	-	-	-	-	-	-	-	-	-	T	T	T	K	T	-	-	S	Y	-	C	A	C	C	R	S	Y	T	C	-	S	Y	G	K	A	G	S	T	C	T	Y	G	S	C	C	G	R	-	M	R
B35	-	-	-	-	-	-	-	-	-	T	T	K	T	T	-	-	G	Y	-	C	W	S	C	C	S	C	T	C	-	C	T	G	W	A	S	S	T	-	W	S	S	T	Y	Y	K	R	-	C	S
B36	-	-	-	-	-	-	-	-	-	T	T	T	T	-	-	-	G	T	-	C	M	C	C	C	G	C	T	C	T	Y	T	G	T	A	G	G	T	C	C	G	G	C	C	G	G	C	-	G	C
B37	-	-	-	-	-	-	-	-	-	A	A	A	G	-	-	-	G	C	A	G	C	G	G	C	G	G	C	A	-	C	C	G	T	G	T	C	T	C	C	G	G	C	C	G	G	-	-	C	G
B38	-	-	-	-	-	-	-	-	-	T	T	T	T	-	-	-	G	T	-	C	M	C	C	C	S	S	T	C	-	C	W	G	W	A	G	G	T	C	C	G	G	C	C	G	S	-	-	C	G
B39	-	-	-	-	-	-	-	-	-	G	T	M	K	-	-	-	G	T	-	C	A	C	C	C	M	Y	T	S	-	M	A	G	Y	A	C	G	R	A	C	K	W	-	S	C	G	A	-	A	G
B41	-	-	-	-	-	-	-	-	-	-	C	T	T	T	T	T	G	T	-	C	A	C	C	C	S	C	T	C	-	C	T	G	K	A	G	G	K	C	C	G	G	S	C	G	G	-	-	M	G
B42	-	-	-	-	-	-	-	-	-	T	T	T	T	T	-	T	G	T	-	C	A	C	C	C	G	C	T	C	-	C	T	G	T	A	G	G	T	C	C	G	G	C	C	G	G	-	-	C	G
B43	-	-	-	-	-	-	-	-	-	K	T	C	T	-	-	-	G	T	-	C	A	C	C	C	R	C	T	C	-	G	T	G	T	A	G	G	T	C	C	G	G	C	C	G	G	-	-	C	G
B44	-	-	-	-	-	-	-	-	-	T	T	T	T	-	-	-	G	T	-	C	A	C	C	C	G	C	T	C	-	C	T	G	T	A	G	G	T	C	C	G	G	C	C	G	G	-	-	C	G
D48	-	-	-	-	-	-	-	-	-	T	T	T	T	-	-	-	G	T	-	C	A	C	C	C	G	C	T	C	-	C	T	G	T	A	G	G	T	C	C	G	G	C	C	G	G	-	-	C	G
D49	-	-	-	-	-	-	-	-	-	S	T	C	T	-	-	-	G	T	-	C	A	C	C	C	G	C	T	C	-	G	T	G	T	A	K	G	T	C	C	G	G	C	C	G	G	-	-	C	G
D50	-	-	-	-	-	-	-	-	-	C	T	C	T	-	-	-	G	T	-	C	A	C	C	C	G	C	T	C	-	G	T	G	T	A	G	G	T	C	C	G	G	C	C	G	G	-	-	C	G
D51	-	-	-	-	-	-	-	-	-	S	T	S	K	-	-	-	G	T	-	C	A	C	C	C	A	Y	T	S	-	G	Y	G	W	A	G	A	R	T	C	G	G	T	C	C	S	Y	-	C	G
D52	-	-	-	-	-	-	-	-	-	C	T	C	T	-	-	-	G	T	-	C	A	C	C	C	G	C	T	C	-	G	T	G	T	A	G	G	T	C	C	G	G	C	C	G	G	-	-	C	G
D53	-	-	-	-	-	-	-	-	-	T	T	T	-	-	-	T	G	T	-	C	A	C	C	C	G	C	T	C	-	C	T	G	T	A	G	G	T	C	C	G	G	M	C	G	G	-	-	C	G
D54	-	-	-	-	-	-	-	-	-	T	T	T	-	-	-	T	G	T	-	C	A	C	C	C	G	C	T	C	-	C	T	G	T	A	G	G	T	C	C	G	G	M	C	G	G	-	-	C	G
D55	-	-	-	-	-	-	-	-	-	-	-	-	-	-	-	-	-	-	-	-	-	-	-	-	-	-	T	C	-	-	C	K	C	A	G	G	T	T	C	A	C	C	T	A	C	S	G	A	A
D56	-	-	-	-	-	-	-	-	-	M	T	C	T	-	-	-	G	T	-	C	A	C	C	M	A	C	T	C	-	G	C	G	T	A	K	G	S	C	M	G	K	-	C	C	G	G	-	C	G
E57	-	-	-	-	-	-	-	-	-	C	T	C	T	-	-	-	G	T	A	C	A	C	C	C	G	C	T	C	-	G	T	G	T	A	G	G	T	C	C	G	G	C	C	G	G	-	-	C	G
E58	-	-	-	-	-	-	-	-	-	C	T	C	T	-	-	-	G	T	-	C	A	C	C	C	G	C	T	C	-	G	T	G	T	A	G	G	T	C	C	G	G	C	C	G	G	-	-	C	G
F59	-	-	-	-	-	-	-	-	-	Y	T	C	T	-	-	-	G	Y	-	C	M	C	C	C	G	C	T	C	-	G	W	G	T	A	G	G	C	C	C	C	K	C	C	G	A	G	T	A	G
F60	-	-	-	-	-	-	-	-	-	Y	T	T	T	-	-	-	G	T	-	C	A	C	C	C	G	C	T	C	-	C	C	G	T	A	G	G	T	C	C	A	G	C	T	G	G	-	-	C	A
F61	-	-	-	-	-	-	-	-	-	C	T	C	C	-	-	-	G	T	-	C	A	C	C	C	A	C	T	C	-	G	T	G	T	A	G	G	C	C	C	G	G	-	C	C	G	G	-	C	G
F62	-	-	-	-	-	-	-	-	-	C	W	T	T	-	-	-	G	Y	-	C	A	T	T	S	Y	T	G	K	G	G	T	R	G	A	R	G	K	M	Y	K	G	Y	M	K	C	-	-	C	K
F63	-	-	-	-	-	-	-	-	-	C	T	C	T	-	-	-	G	T	-	C	A	C	C	C	G	C	T	C	-	G	T	G	T	A	G	G	T	C	C	G	G	C	C	G	G	-	-	C	G
G64	-	-	-	-	-	-	-	-	-	C	T	C	T	-	-	-	G	T	-	C	A	C	C	C	G	C	T	C	-	G	T	G	T	A	G	G	T	C	C	G	G	C	C	G	G	-	-	C	G
G65	-	-	-	-	-	-	-	-	-	T	T	T	K	C	G	T	R	T	-	S	R	S	M	M	G	C	T	Y	-	C	T	K	T	W	K	G	T	C	C	G	R	C	C	S	G	-	-	C	G
G66	-	-	-	-	-	-	-	-	-	T	T	T	T	-	-	T	G	T	-	C	A	C	C	C	G	C	T	C	-	C	T	G	T	A	G	G	T	C	C	G	G	Y	C	G	G	-	-	Y	G
G67	-	-	-	-	-	-	-	-	-	Y	T	C	T	-	-	-	G	T	-	C	W	C	C	C	A	C	T	C	-	G	S	G	T	A	G	R	S	C	C	G	G	C	C	G	G	C	-	G	S
G68	-	-	-	-	-	-	-	-	-	C	T	C	T	-	-	-	G	T	-	C	A	C	C	C	G	C	T	C	-	G	T	G	T	A	G	G	T	C	C	G	G	C	C	G	G	-	-	C	G
G69	-	-	-	-	-	-	-	-	-	T	T	T	T	T	-	-	G	T	-	C	A	C	C	C	G	C	T	C	-	C	T	G	T	A	G	G	T	C	C	G	G	C	C	G	G	-	-	C	G
G70	-	-	-	-	-	-	-	-	-	C	T	C	T	-	-	-	G	T	-	C	A	C	C	C	S	C	T	C	-	G	T	G	T	A	G	G	T	C	C	G	G	C	C	G	G	-	-	C	G
J74	-	-	-	-	-	-	-	-	-	C	T	C	T	-	-	-	G	T	-	C	A	C	C	C	A	C	T	C	-	G	T	G	T	A	G	R	C	C	C	G	G	-	C	C	G	G	-	C	G
J76	-	-	-	-	-	-	-	-	-	C	T	C	T	-	-	-	G	T	-	C	A	C	C	C	G	C	T	C	-	G	T	G	T	A	G	G	T	C	C	G	G	C	C	G	G	-	-	C	G
J77	-	-	-	-	-	-	-	-	-	C	T	C	T	-	-	-	G	T	-	C	A	C	C	C	G	C	T	C	-	G	T	G	T	A	G	G	T	C	C	G	G	C	C	G	G	-	-	C	G
J78	-	-	-	-	-	-	-	-	-	T	T	T	Y	-	-	-	G	T	-	C	Y	Y	C	Y	G	C	T	C	-	Y	W	G	K	A	G	G	Y	C	C	G	G	S	C	G	G	-	-	M	G
J79	-	-	-	-	-	-	-	-	-	T	T	T	T	-	-	-	G	T	-	C	A	C	C	C	G	C	T	C	-	C	T	G	T	A	G	G	T	C	C	G	G	C	C	G	G	-	-	C	G
J80	-	-	-	-	-	-	-	-	-	C	T	C	T	-	-	-	G	T	-	C	A	C	T	C	A	C	T	C	-	G	T	G	T	A	G	G	T	C	C	G	G	-	C	C	G	G	-	C	G
J81	-	-	-	-	-	-	-	-	-	-	C	T	T	T	T	T	G	G	-	C	A	C	C	C	G	C	T	C	-	C	A	G	G	A	G	G	G	C	C	G	G	G	C	G	G	-	-	C	G
J82	-	-	-	-	-	-	-	-	-	T	T	T	T	T	-	-	G	T	-	C	A	C	C	C	G	C	T	C	-	C	T	G	T	A	G	G	T	C	C	G	G	C	C	G	G	-	-	C	G
J83	-	-	-	-	-	-	-	-	-	T	T	T	T	T	-	-	G	T	-	C	A	C	C	C	G	C	T	C	-	C	T	G	T	A	G	G	T	C	C	G	G	C	C	G	G	-	-	C	G
J84	-	-	-	-	-	-	-	-	-	T	T	T	T	T	-	-	G	T	-	C	A	C	C	C	G	C	T	C	-	C	T	G	T	A	G	G	T	C	C	G	G	C	C	G	G	-	-	C	G
J85	-	-	-	-	-	-	-	-	-	T	T	T	-	-	-	T	G	T	-	C	A	C	C	C	G	C	T	C	-	C	T	G	T	A	G	G	T	C	C	G	G	C	C	G	G	-	-	C	G
F86	-	-	-	-	-	-	-	-	-	T	T	T	T	T	-	T	G	T	-	C	A	C	C	C	G	C	T	C	-	C	T	G	T	A	G	G	T	C	C	G	G	C	C	G	G	-	-	C	G
KU855474.1	-	-	-	-	-	-	-	A	G	A	C	C	C	C	A	C	A	A	A	C	T	T	G	A	C	C	C	C	G	A	T	G	C	A	C	C	C	C	A	C	T	T	C	G	G	T	G	C	T
	1	1	1	1	1	1	1	1	1	1	1	1	1	1	1	1	1	1	1	1	1	1	1	1	1	1	1	1	1	1	1	1	1	1	1	1	1	1	1	1	1	1	1	1	1	1	1	1	1
	0	0	0	0	0	0	0	0	0	0	0	0	0	0	0	0	0	0	0	0	0	0	0	0	0	0	0	0	0	0	0	0	0	0	0	0	0	0	0	0	0	0	0	0	0	0	0	0	0
	1	1	1	1	1	2	2	2	2	2	2	2	2	2	2	3	3	3	3	3	3	3	3	3	3	4	4	4	4	4	4	4	4	4	4	5	5	5	5	5	5	5	5	5	5	6	6	6	6
	5	6	7	8	9	0	1	2	3	4	5	6	7	8	9	0	1	2	3	4	5	6	7	8	9	0	1	2	3	4	5	6	7	8	9	0	1	2	3	4	5	6	7	8	9	0	1	2	3
Ab1	-	-	-	-	-	-	-	-	-	-	-	-	-	-	-	-	-	-	-	-	-	-	-	-	-	-	-	-	-	-	-	-	-	-	-	-	-	-	-	-	-	-	-	-	-	-	-	-	-
Ab2	-	-	-	-	-	-	-	-	-	-	-	-	-	-	-	-	-	-	-	-	-	-	-	-	-	-	-	-	-	-	-	-	-	-	-	-	-	T	A	A	C	C	A	G	G	T	T	G	A
Ab3	-	-	-	-	-	-	-	-	-	-	-	-	-	-	-	-	-	-	-	-	-	-	-	-	-	-	-	-	-	-	-	-	-	-	-	-	-	-	-	-	-	-	-	-	-	-	-	-	-
Ab4	-	-	-	-	-	-	-	-	-	-	-	-	-	-	-	-	-	-	-	-	-	-	-	-	-	-	-	-	-	-	-	-	-	-	-	-	-	-	-	-	-	-	-	-	-	-	-	-	-
Ab6	-	-	-	-	-	-	-	-	-	-	-	-	-	-	-	-	-	-	-	-	-	-	-	-	-	-	-	-	-	-	-	-	-	-	-	-	-	-	-	-	-	-	-	-	-	-	-	-	-
Ab7	-	-	-	-	-	-	-	-	-	-	-	-	-	-	-	-	-	-	-	-	-	-	-	-	-	-	-	-	-	-	-	-	-	-	-	-	-	T	T	A	A	A	A	G	G	T	G	G	G
Ab8	-	-	-	-	-	-	-	-	-	-	-	-	-	-	-	-	-	-	-	-	-	-	-	-	-	-	-	-	-	-	-	-	-	-	-	-	-	-	A	A	C	C	M	R	G	G	T	G	A
Ab9	-	-	-	-	-	-	-	-	-	-	-	-	-	-	-	-	-	-	-	-	-	-	-	-	-	-	-	-	-	-	-	-	-	-	-	-	C	T	A	A	C	C	A	G	G	W	T	G	A
Ab10	A	C	C	G	C	C	G	G	S	G	G	M	C	T	G	C	C	C	A	A	C	C	C	C	A	A	C	C	T	T	Y	T	T	T	T	T	C	T	A	A	C	C	A	G	G	T	T	G	A
Ab11	-	-	-	-	-	-	-	-	-	-	-	-	-	-	-	-	-	-	-	-	-	-	-	-	-	-	-	-	-	-	-	-	-	-	-	-	-	-	-	-	-	-	-	-	-	-	-	-	-
Ab12	-	-	-	-	-	-	-	-	-	-	-	-	-	-	-	-	-	-	-	-	-	-	-	-	-	-	-	-	-	-	-	-	-	-	-	-	-	-	-	-	-	-	-	-	-	-	-	-	-
Ab13	-	-	-	-	-	-	-	-	-	-	-	-	-	-	-	-	-	-	-	-	-	-	-	-	-	-	-	-	-	-	-	-	-	-	-	-	-	-	-	-	-	-	-	-	-	-	-	-	-
Ab14	-	-	-	-	-	-	-	-	-	-	-	-	-	-	-	-	-	-	-	-	-	-	-	-	-	-	-	-	-	-	-	-	-	-	-	-	-	-	-	-	-	-	-	-	-	-	-	-	-
G16	-	-	-	-	-	-	-	-	-	-	-	-	-	-	-	-	-	-	-	-	-	-	-	-	-	-	-	-	-	-	-	-	-	-	-	T	T	T	A	A	C	C	A	G	G	T	T	G	A
G17	-	-	-	-	-	-	-	-	-	-	-	-	-	-	-	-	-	-	-	-	-	-	-	-	-	-	-	-	-	-	-	-	-	-	-	-	-	-	-	-	-	-	-	-	-	-	-	-	-
Ab19	-	C	G	G	S	C	G	G	M	G	G	S	C	T	G	Y	C	C	A	A	C	C	C	C	A	A	M	C	T	T	T	T	T	T	-	-	-	T	A	A	C	C	A	R	G	T	T	G	A
Ab20	-	-	-	-	-	-	-	-	-	-	-	-	-	-	-	-	-	-	-	-	-	-	-	-	-	-	-	-	-	-	-	-	-	-	-	T	T	T	A	A	C	C	A	A	G	T	T	G	A
Ab21	-	-	-	-	-	-	-	-	-	-	-	-	-	-	-	-	-	-	-	-	-	-	-	-	-	-	-	-	-	-	-	-	-	-	-	-	-	-	-	-	-	-	-	-	-	-	-	-	-
B22	-	-	-	-	-	-	-	-	-	-	-	-	-	-	-	-	-	-	-	-	-	-	-	-	-	-	-	-	-	-	-	-	-	-	-	T	T	W	A	A	C	C	M	R	G	G	T	C	G
B24	-	-	-	-	-	-	-	-	-	-	-	-	-	-	-	-	-	-	-	-	-	-	-	-	-	-	-	-	-	-	-	-	-	-	T	T	T	T	A	A	C	C	A	G	G	T	T	G	A
B25	-	-	-	-	-	-	-	-	-	-	-	-	-	-	-	-	-	-	-	-	-	-	-	-	-	-	-	-	-	-	-	-	-	-	-	-	-	T	A	A	C	C	A	G	G	G	T	G	A
B26	-	-	-	-	-	-	-	-	-	-	-	-	-	-	-	-	-	-	-	-	-	-	-	-	-	-	-	-	-	-	-	-	-	-	-	-	-	T	A	A	C	C	A	G	G	T	T	G	A
B27	-	-	-	-	-	-	-	-	-	-	-	-	-	-	-	-	-	-	-	-	-	-	-	-	-	-	-	-	-	-	-	-	-	-	-	-	-	T	A	A	C	C	A	G	G	T	T	G	A
B28	-	-	-	-	-	-	-	-	-	-	-	-	-	-	-	-	-	-	-	-	-	-	-	-	-	-	-	-	-	-	-	-	-	-	-	-	-	T	A	A	C	C	A	G	G	T	T	G	A
B29	-	-	-	-	-	-	-	-	-	-	-	-	-	-	-	-	-	-	-	-	-	-	-	-	-	-	-	-	-	-	-	-	-	-	T	T	T	T	A	A	C	C	A	G	G	T	T	G	A
B30	-	-	-	-	-	-	-	-	-	-	-	-	-	-	-	-	-	-	-	-	-	-	-	-	-	-	-	-	-	-	-	-	-	-	-	T	T	T	A	A	C	C	G	G	G	G	T	G	A
B32	-	-	-	-	-	-	-	-	-	-	-	-	-	-	-	-	-	-	-	-	-	-	-	-	-	-	-	-	-	-	-	-	-	-	C	T	T	T	A	A	C	C	A	G	G	T	T	G	A
B33	-	-	-	-	-	-	-	-	-	-	-	-	-	-	-	-	-	-	-	-	-	-	-	-	-	-	-	-	-	-	-	-	-	-	T	T	C	T	A	A	C	C	A	G	G	T	T	G	A
B34	-	-	-	-	-	-	-	-	-	-	-	-	-	-	-	-	-	-	-	-	-	-	-	-	-	-	-	-	-	-	-	-	-	-	-	-	Y	T	A	A	C	C	A	G	G	A	T	G	G
B35	-	-	-	-	-	-	-	-	-	-	-	-	-	-	-	-	-	-	-	-	-	-	-	-	-	-	-	-	-	-	-	-	-	-	-	-	C	C	C	C	C	C	T	G	-	A	T	G	A
B36	-	-	-	-	-	-	-	-	-	-	-	-	-	-	-	-	-	-	-	-	-	-	-	-	-	-	-	-	-	-	-	-	-	-	-	-	T	T	A	A	C	C	A	G	G	T	T	G	A
B37	-	-	-	-	-	-	-	-	-	-	-	-	-	-	-	-	-	-	-	-	-	-	-	-	-	-	-	-	-	-	-	-	-	-	T	T	C	T	A	A	C	C	A	G	G	T	T	G	A
B38	-	-	-	-	-	-	-	-	-	-	-	-	-	-	-	-	-	-	-	-	-	-	-	-	-	-	-	-	-	-	-	-	-	-	-	-	-	T	A	A	C	C	A	G	G	G	T	G	A
B39	-	-	-	-	-	-	-	-	-	-	-	-	-	-	-	-	-	-	-	-	-	-	-	-	-	-	-	-	-	-	-	-	-	-	A	C	A	S	T	G	A	A	-	-	-	-	-	-	T
B41	-	-	-	-	-	-	-	-	-	-	-	-	-	-	-	-	-	-	-	-	-	-	-	-	-	-	-	-	-	-	-	-	-	-	-	-	-	-	A	A	C	C	A	G	G	C	G	G	A
B42	-	-	-	-	-	-	-	-	-	-	-	-	-	-	-	-	-	-	-	-	-	-	-	-	-	-	-	-	-	-	-	-	-	-	T	T	T	T	A	A	C	C	A	G	G	T	T	G	A
B43	-	-	-	-	-	-	-	-	-	-	-	-	-	-	-	-	-	-	-	-	-	-	-	-	-	-	-	-	-	-	-	-	-	-	T	T	T	T	A	A	C	C	A	G	G	T	T	G	A
B44	-	-	-	-	-	-	-	-	-	-	-	-	-	-	-	-	-	-	-	-	-	-	-	-	-	-	-	-	-	-	-	-	-	-	-	T	T	T	A	A	C	C	A	G	G	T	T	G	A
D48	-	-	-	-	-	-	-	-	-	-	-	-	-	-	-	-	-	-	-	-	-	-	-	-	-	-	-	-	-	-	-	-	-	-	-	T	T	T	A	A	C	C	A	G	G	T	T	G	A
D49	-	-	-	-	-	-	-	-	-	-	-	-	-	-	-	-	-	-	-	-	-	-	-	-	-	-	-	-	-	-	-	-	-	-	T	T	T	T	A	A	C	C	A	G	G	T	T	G	A
D50	-	-	-	-	-	-	-	-	-	-	-	-	-	-	-	-	-	-	-	-	-	-	-	-	-	-	-	-	-	-	-	-	-	-	T	T	T	T	A	A	C	C	A	G	G	T	T	G	A
D51	-	-	-	-	-	-	-	-	-	-	-	-	-	-	-	-	-	-	-	-	-	-	-	-	-	-	-	-	-	-	-	-	-	-	T	T	T	A	A	A	A	G	-	-	G	T	T	C	A
D52	-	-	-	-	-	-	-	-	-	-	-	-	-	-	-	-	-	-	-	-	-	-	-	-	-	-	-	-	-	-	-	-	-	-	T	T	T	T	A	A	C	C	A	G	G	T	T	G	A
D53	-	-	-	-	-	-	-	-	-	-	-	-	-	-	-	-	-	-	-	-	-	-	-	-	-	-	-	-	-	-	-	-	-	-	T	T	T	T	A	A	C	C	A	G	G	T	T	G	R
D54	-	-	-	-	-	-	-	-	-	-	-	-	-	-	-	-	-	-	-	-	-	-	-	-	-	-	-	-	-	-	-	-	-	-	T	T	T	T	A	A	C	C	A	G	G	T	T	G	R
D55	-	-	-	-	-	-	-	-	-	-	-	-	-	-	-	-	-	-	-	-	-	-	-	-	-	-	-	-	-	-	-	-	-	-	-	-	-	-	-	-	-	-	-	-	-	-	-	-	-
D56	-	-	-	-	-	-	-	-	-	-	-	-	-	-	-	-	-	-	-	-	-	-	-	-	-	-	-	-	-	-	-	-	-	-	T	T	T	T	A	A	C	C	C	C	G	T	T	T	T
E57	-	-	-	-	-	-	-	-	-	-	-	-	-	-	-	-	-	-	-	-	-	-	-	-	-	-	-	-	-	-	-	-	-	-	T	T	T	T	A	A	C	C	A	G	G	T	T	G	A
E58	-	-	-	-	-	-	-	-	-	-	-	-	-	-	-	-	-	-	-	-	-	-	-	-	-	-	-	-	-	-	-	-	-	-	T	T	T	T	A	A	C	C	A	G	G	T	T	G	A
F59	-	-	-	-	-	-	-	-	-	-	-	-	-	-	-	-	-	-	-	-	-	-	-	-	-	-	-	-	-	-	-	-	-	-	C	T	T	T	A	A	C	C	-	-	-	-	-	-	-
F60	-	-	-	-	-	-	-	-	-	-	-	-	-	-	-	-	-	-	-	-	-	-	-	-	-	-	-	-	-	-	-	-	-	-	C	T	T	T	A	A	C	C	A	G	G	T	T	G	A
F61	-	-	-	-	-	-	-	-	-	-	-	-	-	-	-	-	-	-	-	-	-	-	-	-	-	-	-	-	-	-	-	-	-	-	T	T	T	T	A	A	C	C	A	G	G	T	T	G	A
F62	-	-	-	-	-	-	-	-	-	-	-	-	-	-	-	-	-	-	-	-	-	-	-	-	-	-	-	-	-	-	-	-	-	-	-	-	C	G	A	A	A	G	A	A	T	T	C	T	A
F63	-	-	-	-	-	-	-	-	-	-	-	-	-	-	-	-	-	-	-	-	-	-	-	-	-	-	-	-	-	-	-	-	-	-	T	T	T	T	A	A	C	C	A	G	G	T	T	G	A
G64	-	-	-	-	-	-	-	-	-	-	-	-	-	-	-	-	-	-	-	-	-	-	-	-	-	-	-	-	-	-	-	-	-	-	T	T	T	T	A	A	C	C	A	G	G	T	T	G	A
G65	-	-	-	-	-	-	-	-	-	-	-	-	-	-	-	-	-	-	-	-	-	-	-	-	-	-	-	-	-	-	-	-	-	-	-	-	-	-	-	-	-	-	-	-	-	-	-	-	-
G66	-	-	-	-	-	-	-	-	-	-	-	-	-	-	-	-	-	-	-	-	-	-	-	-	-	-	-	-	-	-	-	-	-	-	T	T	C	T	A	A	C	C	A	G	G	T	T	G	A
G67	-	-	-	-	-	-	-	-	-	-	-	-	-	-	-	-	-	-	-	-	-	-	-	-	-	-	-	-	-	-	-	-	-	-	T	T	C	T	C	T	T	C	A	A	C	C	A	A	A
G68	-	-	-	-	-	-	-	-	-	-	-	-	-	-	-	-	-	-	-	-	-	-	-	-	-	-	-	-	-	-	-	-	-	-	T	T	T	T	A	A	C	C	A	G	G	T	T	G	A
G69	-	-	-	-	-	-	-	-	-	-	-	-	-	-	-	-	-	-	-	-	-	-	-	-	-	-	-	-	-	-	-	-	-	-	T	T	C	T	A	A	C	C	A	G	G	T	T	G	A
G70	-	-	-	-	-	-	-	-	-	-	-	-	-	-	-	-	-	-	-	-	-	-	-	-	-	-	-	-	-	-	-	-	-	-	T	T	T	T	A	A	C	C	A	G	G	T	T	G	A
J74	-	-	-	-	-	-	-	-	-	-	-	-	-	-	-	-	-	-	-	-	-	-	-	-	-	-	-	-	-	-	-	-	-	-	T	T	T	T	A	A	C	C	A	G	G	T	T	G	A
J76	-	-	-	-	-	-	-	-	-	-	-	-	-	-	-	-	-	-	-	-	-	-	-	-	-	-	-	-	-	-	-	-	-	-	T	T	T	T	A	A	C	C	A	G	G	T	T	G	A
J77	-	-	-	-	-	-	-	-	-	-	-	-	-	-	-	-	-	-	-	-	-	-	-	-	-	-	-	-	-	-	-	-	-	-	T	T	T	T	A	A	C	C	A	G	G	T	T	G	A
J78	-	-	-	-	-	-	-	-	-	-	-	-	-	-	-	-	-	-	-	-	-	-	-	-	-	-	-	-	-	-	-	-	-	-	-	-	-	T	C	A	C	C	A	A	G	T	T	G	A
J79	-	-	-	-	-	-	-	-	-	-	-	-	-	-	-	-	-	-	-	-	-	-	-	-	-	-	-	-	-	-	-	-	-	T	T	T	T	A	A	A	C	C	A	G	G	T	T	G	A
J80	-	-	-	-	-	-	-	-	-	-	-	-	-	-	-	-	-	-	-	-	-	-	-	-	-	-	-	-	-	-	-	-	-	-	T	T	T	T	A	A	C	C	A	G	G	T	T	G	A
J81	-	-	-	-	-	-	-	-	-	-	-	-	-	-	-	-	-	-	-	-	-	-	-	-	-	-	-	-	-	-	-	-	-	-	-	-	-	-	A	A	C	C	A	A	G	C	T	G	A
J82	-	-	-	-	-	-	-	-	-	-	-	-	-	-	-	-	-	-	-	-	-	-	-	-	-	-	-	-	-	-	-	-	-	-	T	T	T	T	A	A	C	C	A	G	G	T	T	G	A
J83	-	-	-	-	-	-	-	-	-	-	-	-	-	-	-	-	-	-	-	-	-	-	-	-	-	-	-	-	-	-	-	-	-	-	T	T	C	T	A	A	C	C	A	G	G	T	T	G	A
J84	-	-	-	-	-	-	-	-	-	-	-	-	-	-	-	-	-	-	-	-	-	-	-	-	-	-	-	-	-	-	-	-	-	-	T	T	C	T	A	A	C	C	A	G	G	T	T	G	A
J85	-	-	-	-	-	-	-	-	-	-	-	-	-	-	-	-	-	-	-	-	-	-	-	-	-	-	-	-	-	-	-	-	-	-	-	-	T	T	A	A	C	C	A	G	G	T	T	G	A
F86	-	-	-	-	-	-	-	-	-	-	-	-	-	-	-	-	-	-	-	-	-	-	-	-	-	-	-	-	-	-	-	-	-	-	C	T	T	T	A	A	C	C	A	G	G	T	T	G	A
KU855474.1	-	-	-	-	-	-	-	-	-	-	-	-	-	-	-	-	-	-	-	-	-	-	-	-	-	-	-	-	-	-	-	-	-	-	-	-	-	-	-	-	-	-	-	-	-	-	-	-	-
	1	1	1	1	1	1	1	1	1	1	1	1	1	1	1	1	1	1	1	1	1	1	1	1	1	1	1	1	1	1	1	1	1	1	1	1	1	1	1	1	1	1	1	1	1	1	1	1	1
	0	0	0	0	0	0	0	1	1	1	1	1	1	1	1	1	1	1	1	1	1	1	1	1	1	1	1	1	1	1	1	1	1	1	1	1	1	1	1	1	1	1	1	1	1	1	1	1	1
	9	9	9	9	9	9	9	0	0	0	0	0	0	0	0	0	0	1	1	1	1	1	1	1	1	1	1	2	2	2	2	2	2	2	2	2	2	3	3	3	3	3	3	3	3	3	3	4	4
	3	4	5	6	7	8	9	0	1	2	3	4	5	6	7	8	9	0	1	2	3	4	5	6	7	8	9	0	1	2	3	4	5	6	7	8	9	0	1	2	3	4	5	6	7	8	9	0	1
Ab1	-	-	-	-	-	-	-	-	-	-	-	-	-	-	-	-	-	-	-	-	-	-	-	-	-	-	-	-	-	-	-	-	-	-	-	-	-	-	-	-	-	-	-	-	-	-	-	-	-
Ab2	A	T	T	T	A	-	-	-	-	-	-	-	-	-	-	-	-	-	-	-	-	C	C	T	C	G	G	A	T	C	A	G	G	K	A	R	G	G	A	A	R	S	A	W	T	A	A	-	-
Ab3	-	-	-	-	-	-	-	-	-	-	-	-	-	-	-	-	-	-	-	-	-	-	-	-	-	-	-	-	-	-	-	-	-	-	-	-	-	-	-	-	-	-	-	-	-	-	-	-	-
Ab4	-	-	-	-	-	-	-	-	-	-	-	-	-	-	-	-	-	-	-	-	-	-	-	-	-	-	-	-	-	-	-	-	-	-	-	-	-	-	-	-	-	-	-	-	-	-	-	-	-
Ab6	-	-	-	-	-	-	-	-	-	-	-	-	-	-	-	-	-	-	-	-	-	-	-	-	-	-	-	-	-	-	-	-	-	-	-	-	-	-	-	-	-	-	-	-	-	-	-	-	-
Ab7	T	T	T	T	A	-	-	-	-	-	-	-	-	-	-	-	-	-	-	-	-	-	-	-	-	-	-	A	T	C	C	C	T	A	A	T	T	T	W	A	W	Y	A	A	A	A	A	A	-
Ab8	A	T	T	T	A	A	A	M	A	T	A	-	-	-	-	-	-	-	-	-	-	-	A	R	A	-	-	-	-	-	-	-	-	-	-	-	-	-	-	-	-	-	-	-	-	-	-	-	-
Ab9	A	T	T	T	A	A	A	A	A	T	A	-	-	-	-	-	-	-	-	-	-	-	A	A	-	-	-	-	-	-	-	-	-	-	-	-	-	-	-	-	-	-	-	-	-	-	-	-	-
Ab10	A	K	T	T	W	-	-	-	-	-	-	-	-	-	-	-	-	-	-	-	-	A	A	G	A	T	T	T	K	A	A	-	-	-	-	-	-	-	-	-	-	-	-	-	-	-	-	-	-
Ab11	-	-	-	-	-	-	-	-	-	-	-	-	-	-	-	-	-	-	-	-	-	-	-	-	-	-	-	-	-	-	-	-	-	-	-	-	-	-	-	-	-	-	-	-	-	-	-	-	-
Ab12	-	-	-	-	-	-	-	-	-	-	-	-	-	-	-	-	-	-	-	-	-	-	-	-	-	-	-	-	-	-	-	-	-	-	-	-	-	-	-	-	-	-	-	-	-	-	-	-	-
Ab13	-	-	-	-	-	-	-	-	-	-	-	-	-	-	-	-	-	-	-	-	-	-	-	-	-	-	-	-	-	-	-	-	-	-	-	-	-	-	-	-	-	-	-	-	-	-	-	-	-
Ab14	-	-	-	-	-	-	-	-	-	-	-	-	-	-	-	-	-	-	-	-	-	-	-	-	-	-	-	-	-	-	-	-	-	-	-	-	-	-	-	-	-	-	-	-	-	-	-	-	-
G16	A	T	T	T	A	A	G	C	-	-	-	-	A	T	A	C	A	K	G	T	A	G	G	G	A	T	A	C	C	C	G	C	T	G	A	A	T	T	T	-	A	A	G	C	A	T	A	A	T
G17	-	-	-	-	-	-	-	-	-	-	-	-	-	-	-	-	-	-	-	-	-	-	-	-	-	-	-	-	-	-	-	-	-	-	-	-	-	-	-	-	-	-	-	-	-	-	-	-	-
Ab19	A	G	T	T	T	-	-	-	-	-	-	-	-	-	-	-	-	-	-	-	-	T	A	A	G	A	T	T	G	S	A	A	A	A	-	-	-	-	-	-	-	-	-	-	-	-	-	-	-
Ab20	G	T	T	T	A	-	-	-	-	-	-	-	-	-	-	-	-	-	A	G	A	G	G	G	G	A	C	C	C	G	G	T	T	G	A	G	T	T	T	-	A	A	G	A	T	T	A	A	G
Ab21	-	-	-	-	-	-	-	-	-	-	-	-	-	-	-	-	-	-	-	-	-	-	-	-	-	-	-	-	-	-	-	-	-	-	-	-	-	-	-	-	-	-	-	-	-	-	-	-	-
B22	G	T	T	T	A	-	-	-	-	-	-	-	-	-	-	-	-	-	-	-	-	-	-	-	G	A	G	A	T	-	-	-	T	A	A	G	A	T	T	A	A	-	-	-	-	-	-	-	-
B24	A	T	C	A	G	-	-	-	-	-	-	-	-	-	-	-	-	-	G	T	A	G	G	G	A	T	A	C	C	C	G	C	T	G	A	A	K	T	T	-	A	A	R	S	M	W	K	-	-
B25	A	T	W	T	A	-	-	-	-	-	-	-	-	-	-	-	-	-	-	-	-	A	A	A	G	A	A	W	C	C	G	C	T	G	A	A	T	W	T	A	A	A	A	S	A	A	T	G	A
B26	A	T	T	T	A	-	-	-	-	-	-	-	-	-	-	-	-	-	-	-	-	A	A	A	G	T	A	T	A	T	R	-	T	A	A	A	A	G	T	A	T	A	A	A	A	A	W	A	A
B27	A	T	T	T	A	-	-	-	-	-	-	-	-	-	-	-	-	-	-	-	-	A	A	A	G	C	-	-	C	C	G	C	T	G	A	A	K	T	T	A	A	A	A	G	A	A	T	K	A
B28	A	T	T	T	A	-	-	-	-	-	-	-	-	-	-	-	-	-	-	-	-	A	A	G	A	T	T	T	A	A	A	G	A	T	T	A	A	A	A	-	-	-	-	-	-	-	-	-	-
B29	A	T	C	T	C	-	-	-	-	-	-	G	G	A	T	C	A	G	G	T	A	G	G	G	A	T	A	C	C	C	G	C	T	G	A	W	T	T	T	-	A	R	G	M	A	T	K	A	-
B30	A	T	A	T	A	-	-	-	-	-	-	-	-	-	-	-	-	-	-	-	-	-	-	-	A	A	C	A	T	A	G	G	T	A	A	A	C	A	T	A	G	G	-	-	-	-	-	-	-
B32	-	A	T	T	T	-	-	-	-	-	-	-	-	-	-	-	-	-	-	-	A	A	G	C	A	T	A	A	-	-	-	-	T	-	-	-	-	T	T	-	A	A	G	C	A	T	A	A	-
B33	A	T	T	T	A	-	-	-	-	-	-	-	-	-	-	-	-	-	-	-	A	G	C	A	T	A	A	-	-	-	G	C	T	G	A	A	T	T	T	-	A	A	G	C	A	T	A	A	-
B34	A	T	T	T	A	-	-	-	-	-	-	-	-	-	-	-	-	-	-	-	-	-	-	-	A	G	A	A	T	A	A	S	T	W	A	A	T	T	T	A	A	R	M	R	T	A	A	-	-
B35	A	T	T	T	A	-	-	-	-	-	-	-	-	-	-	-	-	-	-	-	-	-	-	-	A	A	C	A	T	A	A	A	A	A	A	R	C	A	T	A	A	A	A	-	-	-	-	-	-
B36	A	T	T	T	A	-	-	-	-	-	-	-	-	-	-	-	-	-	-	-	-	-	A	A	C	A	A	C	C	C	K	C	T	K	A	A	T	T	T	-	A	A	W	C	A	T	A	A	A
B37	R	T	T	T	A	-	-	-	-	-	-	-	-	-	-	-	-	-	-	-	-	-	A	G	C	A	T	A	A	A	A	C	T	G	A	R	T	T	T	-	A	A	G	C	A	T	A	A	A
B38	A	T	T	T	A	-	-	-	-	-	-	-	-	-	-	-	-	-	-	-	-	-	-	-	-	-	-	-	-	A	G	C	A	T	A	A	T	T	T	-	A	A	R	Y	A	T	A	A	-
B39	-	-	-	-	-	-	-	-	-	-	-	A	A	T	T	T	A	A	G	C	A	-	-	-	-	-	-	T	A	-	A	T	T	A	A	G	Y	A	T	-	A	A	-	-	-	-	-	-	-
B41	A	T	T	T	A	A	G	C	A	T	A	T	T	-	-	-	-	-	-	-	-	-	W	A	A	K	Y	A	T	A	A	A	T	A	A	-	-	-	-	-	-	-	-	-	-	-	-	-	-
B42	A	T	T	T	T	-	-	-	-	-	-	-	-	-	-	-	-	-	-	-	T	A	C	C	-	-	-	-	-	C	G	C	T	G	A	A	T	T	T	T	A	A	G	C	W	T	A	A	-
B43	A	T	T	A	-	-	-	-	-	-	-	-	-	-	-	-	-	-	-	-	-	-	-	-	A	A	A	A	C	-	R	M	T	R	A	W	T	T	A	-	A	A	A	A	A	A	A	A	-
B44	A	T	T	T	A	-	-	-	-	-	-	-	-	-	-	-	-	-	-	-	A	G	C	A	T	C	-	-	-	C	G	C	T	G	A	A	T	T	T	-	A	A	G	C	A	T	A	A	A
D48	A	T	T	T	-	-	-	-	-	-	-	-	-	-	-	-	-	-	-	-	-	A	C	C	-	-	-	-	-	C	G	C	T	G	A	A	T	T	T	-	A	A	G	C	A	T	A	A	-
D49	A	T	T	T	A	-	-	-	-	-	-	-	-	-	-	-	-	-	-	-	-	-	-	-	-	-	-	-	-	-	A	G	T	G	A	A	T	T	W	-	A	A	R	M	A	T	A	A	-
D50	A	T	T	T	A	-	-	-	-	-	-	A	G	-	-	-	-	-	-	-	-	-	-	-	A	T	A	C	C	C	G	C	T	G	A	A	T	T	T	-	A	A	K	M	A	T	A	A	-
D51	-	-	-	-	-	-	-	-	-	-	-	A	A	T	T	T	A	A	G	A	A	-	-	-	-	-	-	T	C	C	G	C	T	G	A	A	T	T	T	-	A	A	G	M	A	T	A	A	A
D52	A	T	T	T	-	-	-	-	-	-	-	-	-	-	-	-	-	-	-	-	-	-	G	G	A	T	A	C	C	C	G	C	T	G	A	A	T	T	T	-	A	A	G	C	A	T	A	A	-
D53	-	A	T	T	T	-	-	-	-	-	-	-	-	-	-	-	-	-	-	-	A	A	G	C	C	C	G	Y	-	-	-	-	T	S	A	A	T	T	T	-	A	A	R	C	A	T	A	A	-
D54	-	A	T	T	T	-	-	-	-	-	-	-	-	-	-	-	-	-	-	-	A	A	G	C	C	C	G	Y	-	-	-	-	T	S	A	A	T	T	T	-	A	A	R	C	A	T	A	A	-
D55	-	-	-	-	-	-	-	-	-	-	-	-	-	-	-	-	-	-	-	-	-	-	-	-	-	-	-	-	-	-	-	-	-	-	-	-	-	-	-	-	-	-	-	-	-	-	-	-	-
D56	-	-	-	-	-	-	-	-	-	-	-	A	A	T	T	T	A	A	C	-	-	-	-	-	-	-	-	C	C	C	G	C	T	G	A	A	T	T	T	-	A	A	C	C	R	T	K	A	A
E57	A	T	T	T	-	-	-	-	-	-	-	-	-	-	-	-	-	-	-	-	-	-	-	-	-	-	-	C	C	C	G	C	T	G	A	A	T	T	T	-	A	A	G	C	A	T	A	A	-
E58	A	T	T	T	A	-	-	-	-	-	-	A	A	T	C	-	A	G	G	T	A	G	G	G	A	T	A	C	C	C	G	C	T	G	A	A	T	T	T	-	A	A	G	M	A	T	A	A	-
F59	-	-	-	-	-	-	-	-	-	-	-	-	-	-	-	-	-	-	-	-	-	-	-	-	-	-	-	-	-	-	-	-	-	-	-	-	-	-	-	-	-	-	-	-	-	-	-	-	-
F60	A	T	T	A	S	-	-	-	-	-	-	-	-	-	-	-	-	-	-	-	-	-	G	G	A	T	A	C	C	C	K	C	T	R	A	A	T	T	T	-	A	A	K	C	A	W	A	A	T
F61	-	-	-	-	-	-	-	-	-	-	-	G	G	A	T	C	A	G	G	T	A	G	G	G	A	T	A	C	C	C	G	C	T	G	A	A	T	T	T	-	A	A	G	Y	T	W	A	A	-
F62	A	T	T	T	A	-	-	-	-	-	-	-	-	-	-	-	-	-	-	-	-	-	-	-	-	T	A	C	C	C	G	C	T	G	A	A	T	T	T	-	A	A	G	C	A	T	A	A	-
F63	-	-	-	-	-	-	-	-	-	-	-	-	-	-	-	-	-	G	G	T	A	G	G	G	A	T	A	C	C	C	G	C	T	G	A	A	T	T	T	-	A	A	G	C	A	T	A	A	-
G64	A	T	T	T	A	-	-	-	-	-	-	A	G	G	-	-	-	-	-	T	A	G	G	G	A	T	A	C	C	C	G	Y	T	G	A	R	T	T	T	-	A	A	G	M	A	T	A	A	-
G65	-	-	-	-	-	-	-	-	-	-	-	-	-	-	-	-	-	-	-	-	-	-	-	-	-	-	-	-	-	-	-	-	-	-	-	-	-	-	-	-	-	-	-	-	-	-	-	-	-
G66	C	A	G	G	T	-	-	-	-	-	-	-	-	-	-	-	-	-	-	-	A	G	G	G	A	T	A	C	C	C	G	C	T	G	A	A	T	T	T	-	A	A	G	C	A	T	A	A	T
G67	-	-	-	-	-	-	-	-	-	-	-	-	-	-	-	-	-	-	-	-	-	-	-	-	-	-	-	-	-	-	-	-	-	-	-	-	-	-	-	-	-	-	-	-	-	-	-	-	-
G68	C	G	G	A	-	-	-	-	-	-	-	-	-	-	-	-	-	-	-	-	-	-	-	-	T	C	A	G	G	W	A	G	G	G	A	T	A	C	C	-	C	G	Y	T	R	A	A	T	T
G69	A	T	T	T	A	-	-	-	-	-	-	-	-	-	-	-	-	-	-	-	A	G	C	A	T	A	A	-	-	-	G	C	T	G	A	A	T	T	T	-	A	A	G	C	A	T	A	A	-
G70	A	T	T	T	-	-	-	-	-	-	-	-	-	-	-	-	-	-	-	-	-	-	-	-	A	A	G	C	C	T	G	C	T	G	A	A	W	T	T	-	A	A	K	C	A	T	A	A	-
J74	-	-	-	-	-	-	-	-	-	-	-	A	A	T	T	T	A	A	C	C	A	-	-	G	A	T	A	C	C	C	G	C	T	G	A	R	T	T	T	-	A	A	S	C	A	T	A	A	A
J76	A	T	T	T	A	-	-	-	-	-	-	A	G	C	-	-	-	-	-	-	-	-	-	-	A	T	A	A	C	-	G	C	T	G	A	A	T	T	T	-	A	A	G	C	A	T	A	A	-
J77	A	T	-	-	-	-	-	-	-	-	-	-	-	-	-	-	-	-	G	T	A	G	G	G	A	T	A	C	C	C	G	C	T	G	A	A	T	T	T	-	A	A	G	C	A	T	A	A	-
J78	A	T	T	T	A	-	-	-	-	-	-	-	-	-	-	-	-	-	-	-	A	G	G	G	A	T	A	C	C	C	S	C	T	A	A	A	T	T	T	-	A	A	R	C	A	T	A	A	-
J79	A	T	T	A	A	-	-	-	-	-	-	-	-	-	-	-	-	-	-	-	-	A	A	R	A	W	A	C	C	C	S	Y	W	A	A	A	T	W	W	A	A	A	M	A	W	A	A	A	-
J80	A	T	T	T	A	A	G	C	A	T	A	A	G	A	T	C	A	G	G	T	A	G	G	G	A	T	A	C	C	C	G	C	T	G	A	R	T	T	T	-	A	A	G	C	A	T	A	A	-
J81	A	T	T	T	A	A	T	T	A	A	A	-	-	-	-	-	-	-	-	-	-	-	A	A	A	T	A	A	C	A	A	T	T	T	A	A	K	Y	A	A	A	A	M	A	T	A	A	C	-
J82	A	T	T	T	A	-	-	-	-	-	-	-	-	-	-	-	-	-	-	-	A	G	G	G	A	T	A	C	C	C	G	C	T	G	A	A	T	T	T	-	A	A	G	C	A	W	A	A	-
J83	A	T	T	T	A	-	-	-	-	-	-	-	-	-	-	-	-	-	-	-	A	G	C	A	T	A	A	C	C	C	G	C	T	G	A	A	T	T	T	-	A	A	G	C	A	W	A	A	-
J84	R	T	T	T	A	-	-	-	-	-	-	-	-	-	-	-	-	-	-	-	A	G	C	A	T	A	A	C	-	-	G	C	T	G	A	R	T	T	T	-	A	A	G	C	A	T	A	A	-
J85	-	A	T	T	T	-	-	-	-	-	-	-	-	-	-	-	-	-	-	-	A	A	G	C	A	T	A	A	-	-	-	-	T	G	A	A	T	T	T	-	A	A	G	C	A	T	A	A	-
F86	A	T	T	T	A	-	-	-	-	-	-	-	-	-	-	-	-	-	-	-	A	G	C	A	T	A	A	-	-	C	G	C	T	G	A	A	T	T	T	-	A	A	G	C	A	W	A	A	-
KU855474.1	-	-	-	-	-	-	-	-	-	-	-	-	-	-	-	-	-	-	-	-	-	-	-	-	-	-	-	-	-	-	-	-	-	-	-	-	-	-	-	-	-	-	-	-	-	-	-	-	-
	1	1	1	1
	1	1	1	1
	7	7	7	7
	1	2	3	4
Ab1	-	-	-	-
Ab2	-	-	-	-
Ab3	-	-	-	-
Ab4	-	-	-	-
Ab6	-	-	-	-
Ab7	-	-	-	-
Ab8	-	-	-	-
Ab9	-	-	-	-
Ab10	-	-	-	-
Ab11	-	-	-	-
Ab12	-	-	-	-
Ab13	-	-	-	-
Ab14	-	-	-	-
G16	-	-	-	-
G17	-	-	-	-
Ab19	-	-	-	-
Ab20	-	-	-	-
Ab21	-	-	-	-
B22	-	-	-	-
B24	-	-	-	-
B25	-	-	-	-
B26	-	-	-	-
B27	-	-	-	-
B28	-	-	-	-
B29	-	-	-	-
B30	-	-	-	-
B32	-	-	-	-
B33	-	-	-	-
B34	-	-	-	-
B35	-	-	-	-
B36	-	-	-	-
B37	-	-	-	-
B38	-	-	-	-
B39	-	-	-	-
B41	-	-	-	-
B42	-	-	-	-
B43	-	-	-	-
B44	-	-	-	-
D48	-	-	-	-
D49	-	-	-	-
D50	-	-	-	-
D51	-	-	-	-
D52	-	-	-	-
D53	-	-	-	-
D54	-	-	-	-
D55	-	-	-	-
D56	-	-	-	-
E57	-	-	-	-
E58	-	-	-	-
F59	-	-	-	-
F60	T	T	C	T
F61	-	-	-	-
F62	-	-	-	-
F63	-	-	-	-
G64	-	-	-	-
G65	-	-	-	-
G66	-	-	-	-
G67	-	-	-	-
G68	-	-	-	-
G69	-	-	-	-
G70	-	-	-	-
J74	-	-	-	-
J76	-	-	-	-
J77	-	-	-	-
J78	-	-	-	-
J79	-	-	-	-
J80	-	-	-	-
J81	-	-	-	-
J82	-	-	-	-
J83	-	-	-	-
J84	-	-	-	-
J85	-	-	-	-
F86	-	-	-	-
KU855474.1	-	-	-	-
[truncated: 29 more columns]

## Sheet: Parsimony sites
Additional file 3
COEFFICIENT OF DIFFERENTIATION SHOWING PARISIMONY INFORMATIVE SITES IN MULTIPLE ALIGNMENTS OF ARTOCARPUS ALTILIS AND ACCESSIONS OF TRECULIA AFRICANA var AFRICANA
Domain: Data Coding Codon Start: 1
										1	1	1	1	1	1	1	1	1	1	2	2	2	2	2	2	2	2	2	2	3	3	3	3	3	3	3	3	3	3	4	4	4	4	4	4	4	4	4	4
	1	2	3	4	5	6	7	8	9	0	1	2	3	4	5	6	7	8	9	0	1	2	3	4	5	6	7	8	9	0	1	2	3	4	5	6	7	8	9	0	1	2	3	4	5	6	7	8	9
Ab1	-	-	-	-	-	-	-	-	-	-	-	-	-	-	-	-	-	-	-	-	-	-	-	-	-	-	-	-	-	-	-	-	-	-	-	-	-	-	-	-	-	-	-	-	-	-	-	-	-
Ab2	-	-	-	-	-	-	-	-	-	-	-	-	-	-	-	-	-	-	-	-	-	-	-	-	-	-	-	-	-	-	-	-	-	-	-	-	-	-	T	T	T	A	A	C	A	A	R	G	T
Ab3	-	-	-	-	-	-	-	-	-	-	-	-	-	-	-	-	-	-	-	-	-	-	-	-	-	-	-	-	-	-	-	-	-	-	-	-	-	-	-	-	-	-	-	-	-	-	-	-	-
Ab4	-	-	-	-	-	-	-	-	-	-	-	-	-	-	-	-	-	-	-	-	-	-	-	-	-	-	-	-	-	-	-	-	-	-	-	-	-	-	-	-	-	-	-	-	-	-	-	-	-
Ab6	-	-	-	-	-	-	-	-	-	-	-	-	-	-	-	-	-	-	-	-	-	-	-	-	-	-	-	-	-	-	-	-	-	-	-	-	-	-	-	-	-	-	-	-	-	-	-	-	-
Ab7	-	-	-	-	-	-	-	-	-	-	-	-	-	-	-	-	-	-	-	-	-	-	-	-	-	-	-	-	-	-	-	-	-	-	-	-	-	T	W	W	T	A	A	Y	A	A	G	G	K
Ab8	-	-	-	-	-	-	-	-	-	-	-	-	-	-	-	-	-	-	-	-	-	-	-	-	-	-	-	-	-	-	-	-	-	-	-	-	-	-	-	-	-	-	-	-	-	-	-	-	-
Ab9	-	-	-	-	-	-	-	-	-	-	-	-	-	-	-	-	-	-	-	-	-	-	-	-	-	-	-	-	-	-	-	-	-	-	-	-	-	-	-	-	-	-	-	-	-	-	-	-	-
Ab10	-	-	-	-	-	-	-	-	-	-	-	-	-	-	-	-	-	-	-	-	-	-	-	-	-	-	-	-	-	-	-	-	-	-	-	-	-	-	T	T	M	T	W	C	W	A	A	R	W
Ab11	-	-	-	-	-	-	-	-	-	-	-	-	-	-	-	-	-	-	-	-	-	-	-	-	-	-	-	-	-	-	-	-	-	-	-	-	-	-	-	-	-	-	-	-	-	-	-	-	-
Ab12	-	-	-	-	-	-	-	-	-	-	-	-	-	-	-	-	-	-	-	-	-	-	-	-	-	-	-	-	-	-	-	-	-	-	-	-	-	-	-	T	M	T	W	C	A	A	G	G	T
Ab13	-	-	-	-	-	-	-	-	-	-	-	-	-	-	-	-	-	-	-	-	-	-	-	-	-	-	-	-	-	-	-	-	-	-	-	-	-	-	-	-	-	-	-	-	-	-	-	-	-
Ab14	-	-	-	-	-	-	-	-	-	-	-	-	-	-	-	-	-	-	-	-	-	-	-	-	-	-	-	-	-	-	-	-	-	-	-	-	-	-	-	-	-	-	-	-	-	A	G	S	T
G16	-	-	-	-	-	-	-	-	-	-	-	-	-	-	-	-	-	-	-	-	-	-	-	-	-	-	-	-	-	-	-	-	-	-	-	-	-	-	-	-	-	-	-	-	-	-	-	-	-
G17	-	-	-	-	-	-	-	-	-	-	-	-	-	-	-	-	-	-	-	-	-	-	-	-	-	-	-	-	-	-	-	-	-	-	-	-	-	-	T	T	T	A	A	C	A	A	G	G	T
Ab19	-	-	-	-	-	-	-	-	-	-	-	-	-	-	-	-	-	-	-	-	-	-	-	-	-	-	-	-	-	-	-	-	-	-	-	-	T	T	T	T	M	W	A	C	W	W	G	G	T
Ab20	-	-	-	-	-	-	-	-	-	-	-	-	-	-	-	-	-	-	-	-	-	-	-	-	-	-	-	-	-	-	-	-	-	-	-	-	-	-	C	T	C	A	A	C	A	A	G	G	T
Ab21	-	-	-	-	-	-	-	-	-	-	-	-	-	-	-	-	-	-	-	-	-	-	-	-	-	-	-	-	-	-	-	-	-	-	-	-	T	W	A	C	A	A	A	C	A	A	G	G	T
B22	-	-	-	-	-	-	-	-	-	-	-	-	-	-	-	-	-	-	-	-	-	-	-	-	-	-	-	-	-	-	-	-	-	-	-	-	-	-	-	-	-	-	-	-	-	-	-	-	-
B24	-	-	-	-	-	-	-	-	-	-	-	-	-	-	-	-	-	-	-	-	-	-	-	-	-	-	-	-	-	-	-	-	-	-	-	-	-	-	-	-	-	A	W	Y	A	A	G	G	T
B25	-	-	-	-	-	-	-	-	-	-	-	-	-	-	-	-	-	-	-	-	-	-	-	-	-	-	-	-	-	-	-	-	-	-	-	-	-	-	T	W	A	A	A	M	A	A	G	G	T
B26	-	-	-	-	-	-	-	-	-	-	-	-	-	-	-	-	-	-	-	-	-	-	-	-	-	-	-	-	-	-	-	-	-	-	-	-	-	T	A	T	A	A	A	C	A	A	G	G	T
B27	-	-	-	-	-	-	-	-	-	-	-	-	-	-	-	-	-	-	-	-	-	-	-	-	-	-	-	-	-	-	-	-	-	-	-	-	-	-	-	-	-	-	-	-	-	-	-	-	-
B28	-	-	-	-	-	-	-	-	-	-	-	-	-	-	-	-	-	-	-	-	-	-	-	-	-	-	-	-	-	-	-	-	-	-	-	-	-	T	T	T	T	W	W	C	A	A	G	G	T
B29	-	-	-	-	-	-	-	-	-	-	-	-	-	-	-	-	-	-	-	-	-	-	-	-	-	-	-	-	-	-	-	-	-	-	-	-	-	-	-	-	-	-	-	-	-	-	-	-	-
B30	-	-	-	-	-	-	-	-	-	-	-	-	-	-	-	-	-	-	-	-	-	-	-	-	-	-	-	-	-	-	-	-	-	-	-	-	-	-	T	W	T	A	T	A	A	A	A	R	T
B32	-	-	-	-	-	-	-	-	-	-	-	-	-	-	-	-	-	-	-	-	-	-	-	-	-	-	-	-	-	-	-	-	-	-	-	-	-	-	-	-	-	-	-	-	-	-	-	-	-
B33	-	-	-	-	-	-	-	-	-	-	-	-	-	-	-	-	-	-	-	-	-	-	-	-	-	-	-	-	-	-	-	-	-	-	-	-	-	-	-	-	-	-	A	C	A	A	G	G	T
B34	-	-	-	-	-	-	-	-	-	-	-	-	-	-	-	-	-	-	-	-	-	-	-	-	-	-	-	-	-	-	-	-	-	-	-	-	-	-	-	-	-	-	-	C	A	A	G	G	Y
B35	-	-	-	-	-	-	-	-	-	-	-	-	-	-	-	-	-	-	-	-	-	-	-	-	-	-	-	-	-	-	-	-	-	-	-	-	-	-	-	-	-	-	-	-	-	-	-	-	-
B36	-	-	-	-	-	-	-	-	-	-	-	-	-	-	-	-	-	-	-	-	-	-	-	-	-	-	-	-	-	-	-	-	-	-	-	-	-	-	-	-	T	A	A	C	A	A	G	T	T
B37	-	-	-	-	-	-	-	-	-	-	-	-	-	-	-	-	-	-	-	-	-	-	-	-	-	-	-	-	-	-	-	-	-	-	-	-	-	-	T	T	T	A	W	Y	T	A	G	G	T
B38	-	-	-	-	-	-	-	-	-	-	-	-	-	-	-	-	-	-	-	-	-	-	-	-	-	-	-	-	-	-	-	-	-	-	-	-	-	-	-	T	T	A	T	C	A	A	R	R	T
B39	-	-	-	-	-	-	-	-	-	-	-	-	-	-	-	-	-	-	-	-	-	-	-	-	-	-	-	-	-	-	-	-	-	-	-	-	-	-	-	-	-	-	-	-	-	-	-	-	-
B41	-	-	-	-	-	-	-	-	-	-	-	-	-	-	-	-	-	-	-	-	-	-	-	-	-	-	-	-	-	-	-	-	-	-	-	-	-	-	-	-	-	-	-	-	-	-	-	-	-
B42	-	-	-	-	-	-	-	-	-	-	-	-	-	-	-	-	-	-	-	-	-	-	-	-	-	-	-	-	-	-	-	-	-	-	-	-	-	-	-	T	T	A	A	C	A	A	G	G	T
B43	-	-	-	-	-	-	-	-	-	-	-	-	-	-	-	-	-	-	-	-	-	-	-	-	-	-	-	-	-	-	-	-	-	-	-	-	-	-	-	-	-	-	-	-	-	-	-	-	-
B44	-	-	-	-	-	-	-	-	-	-	-	-	-	-	-	-	-	-	-	-	-	-	-	-	-	-	-	-	-	-	-	-	-	-	-	-	-	-	-	-	T	A	A	C	A	A	G	G	T
D48	-	-	-	-	-	-	-	-	-	-	-	-	-	-	-	-	-	-	-	-	-	-	-	-	-	-	-	-	-	-	-	-	-	-	-	-	-	-	-	-	-	A	A	C	A	A	G	G	T
D49	-	-	-	-	-	-	-	-	-	-	-	-	-	-	-	-	-	-	-	-	-	-	-	-	-	-	-	-	-	-	-	-	-	-	-	-	G	G	G	G	T	A	A	C	A	A	G	G	T
D50	-	-	-	-	-	-	-	-	-	-	-	-	-	-	-	-	-	-	-	-	-	-	-	-	-	-	-	-	-	-	-	-	-	-	-	-	-	-	-	-	T	A	A	C	W	A	G	G	T
D51	-	-	-	-	-	-	-	-	-	-	-	-	-	-	-	-	-	-	-	-	-	-	-	-	-	-	-	-	-	-	-	-	-	-	-	-	-	-	-	-	-	-	-	-	-	-	-	-	-
D52	-	-	-	-	-	-	-	-	-	-	-	-	-	-	-	-	-	-	-	-	-	-	-	-	-	-	-	-	-	-	-	-	-	-	-	-	-	-	-	-	T	A	A	C	A	A	G	G	T
D53	-	-	-	-	-	-	-	-	-	-	-	-	-	-	-	-	-	-	-	-	-	-	-	-	-	-	-	-	-	-	-	-	-	-	-	-	-	-	-	-	-	-	A	C	A	A	G	G	T
D54	-	-	-	-	-	-	-	-	-	-	-	-	-	-	-	-	-	-	-	-	-	-	-	-	-	-	-	-	-	-	-	-	-	-	-	-	-	-	-	-	-	-	A	C	A	A	G	G	T
D55	-	-	-	-	-	-	-	-	-	-	-	-	-	-	-	-	-	-	-	-	-	-	-	-	-	-	-	-	-	-	-	-	-	-	-	-	-	-	-	-	-	-	-	-	-	-	-	-	-
D56	-	-	-	-	-	-	-	-	-	-	-	-	-	-	-	-	-	-	-	-	-	-	-	-	-	-	-	-	-	-	-	-	-	-	-	G	C	T	A	A	C	A	A	S	G	K	T	T	T
E57	-	-	-	-	-	-	-	-	-	-	-	-	-	-	-	-	-	-	-	-	-	-	-	-	-	-	-	-	-	-	-	-	-	-	-	-	-	-	-	-	-	-	A	Y	A	A	G	G	T
E58	-	-	-	-	-	-	-	-	-	-	-	-	-	-	-	-	-	-	-	-	-	-	-	-	-	-	-	-	-	-	-	-	-	-	-	-	-	-	-	-	T	A	W	Y	A	A	G	G	T
F59	-	-	-	-	-	-	-	-	-	-	-	-	-	-	-	-	-	-	-	-	-	-	-	-	-	-	-	-	-	-	-	-	-	-	-	-	-	-	-	-	-	A	A	C	A	A	G	G	T
F60	-	-	-	-	-	T	T	W	M	T	T	A	C	W	T	T	W	Y	C	T	T	G	G	T	T	K	S	C	K	T	A	G	C	G	G	A	S	G	S	A	K	S	G	A	T	A	G	R	T
F61	-	-	-	-	-	-	-	-	-	-	-	-	-	-	-	-	-	-	-	-	-	-	-	-	-	-	-	-	-	-	-	-	-	-	-	-	-	-	-	-	T	A	W	C	A	A	G	G	T
F62	-	-	-	-	-	-	-	-	-	-	-	-	-	-	-	-	-	-	-	-	-	-	-	-	-	-	-	-	-	-	-	-	-	-	-	-	-	-	-	-	-	A	A	C	A	A	G	G	T
F63	-	-	-	-	-	-	-	-	-	-	-	-	-	-	-	-	-	-	-	-	-	-	-	-	-	-	-	-	-	-	-	-	-	-	-	-	-	-	-	-	-	-	-	-	-	-	-	-	-
G64	-	-	-	-	-	-	-	-	-	-	-	-	-	-	-	-	-	-	-	-	-	-	-	-	-	-	-	-	-	-	-	-	-	-	-	-	-	-	-	-	T	A	A	C	A	A	G	G	T
G65	-	-	-	-	-	-	-	-	-	-	-	-	-	-	-	-	-	-	-	-	-	-	-	-	-	-	-	-	-	-	-	-	-	-	-	-	-	-	-	-	-	A	A	C	A	A	G	G	T
G66	-	-	-	-	-	-	-	-	-	-	-	-	-	-	-	-	-	-	-	-	-	-	-	-	-	-	-	-	-	-	-	-	-	-	-	-	-	-	-	-	T	A	W	C	A	A	G	G	T
G67	-	-	-	-	-	-	-	-	-	-	-	-	-	-	-	-	-	-	-	-	-	-	-	-	-	-	-	-	-	-	-	A	W	G	G	G	T	Y	T	T	A	A	C	A	A	G	G	T	T
G68	-	-	-	-	-	-	-	-	-	-	-	-	-	-	-	-	-	-	-	-	-	-	-	-	-	-	-	-	-	-	-	-	-	-	-	-	-	-	-	-	-	A	A	C	A	A	G	G	T
G69	-	-	-	-	-	-	-	-	-	-	-	-	-	-	-	-	-	-	-	-	-	-	-	-	-	-	-	-	-	-	-	-	-	-	-	-	-	-	-	T	C	W	A	C	A	A	G	G	T
G70	-	-	-	-	-	-	-	-	-	-	-	-	-	-	-	-	-	-	-	-	-	-	-	-	-	-	-	-	-	-	-	-	-	-	-	-	-	-	A	A	C	A	A	G	G	T	T	T	C
J74	-	-	-	-	-	-	-	-	-	-	-	-	-	-	-	-	-	-	-	-	-	-	-	-	-	-	T	A	T	M	A	A	R	R	A	K	T	T	T	R	T	A	A	C	A	G	G	G	T
J76	-	-	-	-	-	-	-	-	-	-	-	-	-	-	-	-	-	-	-	-	-	-	-	-	-	-	-	-	-	-	-	-	-	-	-	-	-	-	-	-	-	A	A	C	A	A	G	G	T
J77	-	-	-	-	-	-	-	-	-	-	-	-	-	-	-	-	-	-	-	-	-	-	-	-	-	-	-	-	-	-	-	-	-	-	-	-	-	-	-	-	-	A	A	C	A	A	G	G	T
J78	-	-	-	-	-	-	-	-	-	-	-	-	-	-	-	-	-	-	-	-	-	-	-	-	-	-	-	-	-	-	-	-	-	-	-	-	-	-	-	T	T	A	A	C	A	A	G	G	T
J79	-	-	-	-	-	-	-	-	-	-	-	-	-	-	-	-	-	-	-	-	-	-	-	-	-	-	-	-	-	-	-	-	-	-	-	-	-	-	-	T	T	T	A	M	A	A	R	G	T
J80	-	-	-	-	-	-	-	-	-	-	-	-	-	-	-	-	-	-	-	-	-	-	-	-	-	-	-	-	-	-	-	-	-	-	-	-	-	T	T	T	T	W	A	C	A	A	G	G	T
J81	T	A	A	C	W	A	A	R	C	A	A	G	G	T	T	T	G	G	G	T	A	G	C	T	G	A	M	C	S	T	A	G	G	G	A	A	G	G	A	T	C	A	G	A	G	T	S	G	A
J82	-	-	-	-	-	-	-	-	-	-	-	-	-	-	-	-	-	-	-	-	-	-	-	-	-	-	-	-	-	-	-	-	-	-	-	-	-	-	-	T	T	A	A	C	A	A	G	G	T
J83	-	-	-	-	-	-	-	-	-	-	-	-	-	-	-	-	-	-	-	-	-	-	-	-	-	-	-	-	-	-	-	-	-	-	-	-	-	-	-	-	-	A	W	C	A	A	G	G	T
J84	-	-	-	-	-	-	-	-	-	-	-	-	-	-	-	-	-	-	-	-	-	-	-	-	-	-	-	-	-	-	-	-	-	-	-	-	-	-	-	-	-	-	A	C	A	A	G	G	T
J85	-	-	-	-	-	-	-	-	-	-	-	-	-	-	-	-	-	-	-	-	-	-	-	-	-	-	-	-	-	-	-	-	-	-	-	-	-	-	-	-	T	A	W	C	A	A	G	G	T
F86	-	-	-	-	-	-	-	-	-	-	-	-	-	-	-	-	-	-	-	-	-	-	-	-	-	-	-	-	-	-	-	-	-	-	-	-	-	-	-	-	T	W	A	C	A	A	G	G	T
KU855474.1	-	-	-	-	-	-	-	-	-	-	-	-	-	-	-	-	-	-	-	-	-	-	-	-	-	-	-	-	-	-	-	-	-	-	-	-	-	-	-	-	-	-	-	-	-	-	-	-	-
																						1	1	1	1	1	1	1	1	1	1	1	1	1	1	1	1	1	1	1	1	1	1	1	1	1	1	1	1
	7	8	8	8	8	8	8	8	8	8	8	9	9	9	9	9	9	9	9	9	9	0	0	0	0	0	0	0	0	0	0	1	1	1	1	1	1	1	1	1	1	2	2	2	2	2	2	2	2
	9	0	1	2	3	4	5	6	7	8	9	0	1	2	3	4	5	6	7	8	9	0	1	2	3	4	5	6	7	8	9	0	1	2	3	4	5	6	7	8	9	0	1	2	3	4	5	6	7
Ab1	T	C	C	G	T	A	G	G	T	G	A	A	C	C	T	G	C	G	G	A	-	-	-	-	-	-	-	A	G	G	A	T	C	A	T	T	A	C	C	G	A	G	T	G	T	T	T	-	-
Ab2	.	.	.	.	.	.	.	.	.	.	.	.	.	.	.	.	.	.	A	.	-	-	-	-	-	-	-	.	.	.	.	.	.	.	.	.	.	.	.	.	.	.	.	.	-	.	.	T	-
Ab3	.	.	.	.	.	.	.	.	.	.	.	.	.	.	.	.	.	.	.	.	-	-	-	-	-	-	-	.	.	A	.	.	.	.	.	.	G	.	A	.	.	.	A	.	.	.	.	-	-
Ab4	.	.	.	.	.	.	A	.	G	.	.	.	.	.	.	.	.	.	.	.	-	-	-	-	-	-	A	.	.	-	.	A	.	.	A	.	.	.	.	.	.	A	.	.	-	S	-	-	-
Ab6	.	T	G	.	.	.	.	.	.	.	G	.	A	G	G	A	T	C	A	.	-	-	-	-	-	-	-	-	.	.	.	.	.	.	.	.	G	G	G	C	.	.	.	.	.	.	.	-	-
Ab7	.	G	.	.	.	.	.	.	G	.	.	.	.	.	.	.	.	.	.	.	-	-	-	-	-	-	-	.	.	.	.	.	.	.	.	.	.	.	.	.	.	.	.	.	.	.	.	T	-
Ab8	-	-	-	-	-	-	-	-	-	-	-	-	-	-	-	-	-	-	-	-	-	-	-	-	-	-	-	-	-	-	-	-	-	-	-	-	-	-	-	-	-	-	-	-	-	-	-	-	-
Ab9	-	-	-	-	-	-	-	-	-	-	-	-	-	-	-	-	-	-	-	-	-	-	-	-	-	-	-	-	-	-	-	-	-	-	-	-	-	-	-	-	-	-	-	-	-	-	-	-	-
Ab10	A	T	.	A	.	T	A	C	C	.	.	G	T	G	.	T	T	.	.	.	C	T	G	C	G	G	A	.	.	.	.	.	.	.	.	.	.	.	.	.	.	.	.	.	-	.	.	T	-
Ab11	-	T	T	A	.	T	M	T	.	A	.	.	T	T	C	A	S	C	.	G	-	-	-	-	-	-	-	-	.	T	.	.	.	C	C	.	.	.	M	T	G	A	.	C	-	-	-	C	G
Ab12	A	T	.	A	.	T	A	C	C	.	.	G	T	G	.	T	T	.	.	.	T	G	G	-	-	G	A	.	.	.	.	.	.	.	.	.	.	.	.	.	.	.	.	.	-	.	.	T	-
Ab13	-	T	T	T	.	K	C	T	.	A	.	.	T	T	.	A	K	S	.	G	-	-	-	-	-	-	-	-	.	T	.	.	A	C	C	C	.	.	.	.	G	.	.	T	-	-	-	C	C
Ab14	.	A	T	.	.	T	T	S	C	.	G	T	G	G	C	C	.	.	.	.	T	C	-	-	-	-	-	.	T	.	.	Y	T	G	A	G	T	S	.	.	G	.	C	C	C	.	.	T	-
G16	-	-	-	-	-	-	-	-	-	-	-	-	-	-	-	-	-	-	-	-	-	-	-	-	-	-	-	-	-	-	-	-	-	-	-	-	-	-	-	-	-	-	-	-	-	-	-	-	-
G17	.	.	T	.	.	.	.	.	.	.	T	T	.	.	.	.	.	.	.	.	-	-	-	-	-	-	-	.	.	.	.	.	.	.	.	G	.	A	G	.	.	.	.	T	-	.	.	T	-
Ab19	.	.	.	.	.	.	.	.	.	.	.	.	.	.	.	.	.	.	.	.	-	-	-	-	-	-	-	.	.	.	.	.	.	.	.	.	.	.	.	.	.	.	.	.	-	.	.	T	-
Ab20	.	Y	M	.	.	.	.	.	.	.	.	M	.	.	.	.	.	.	.	.	-	-	-	-	-	-	-	.	.	R	.	.	.	.	.	.	.	.	.	.	.	.	.	.	-	.	.	T	-
Ab21	.	.	G	.	.	.	.	.	.	.	.	.	.	T	.	.	.	.	.	.	-	-	-	-	-	-	-	.	.	.	.	.	.	.	.	.	.	.	.	.	.	.	.	.	-	.	.	T	-
B22	.	T	T	C	.	.	.	A	G	.	.	.	.	.	C	C	T	.	.	.	-	-	-	-	-	-	-	.	A	.	G	.	A	.	.	A	T	T	.	S	.	.	W	.	.	.	.	T	G
B24	.	.	.	.	.	.	.	.	.	.	.	.	.	.	.	.	.	.	.	.	-	-	-	-	-	-	A	G	.	-	.	.	.	.	.	.	.	.	.	.	.	.	.	.	-	.	.	T	-
B25	.	.	T	.	.	.	.	.	.	.	.	.	.	.	.	.	.	.	.	.	-	-	-	-	-	-	-	.	.	.	.	.	.	.	.	.	.	.	.	.	.	.	.	.	-	.	.	T	-
B26	.	.	G	.	.	.	.	.	.	.	.	.	.	.	.	.	.	.	.	.	-	-	-	-	-	-	-	.	.	.	.	.	.	.	.	.	.	.	.	.	.	.	.	.	-	.	.	T	-
B27	-	-	-	-	-	-	-	-	-	-	-	-	-	-	-	-	-	-	-	-	-	-	-	-	-	-	-	-	-	-	-	-	-	-	-	-	-	-	-	-	-	-	-	-	-	-	-	-	-
B28	.	.	.	.	.	.	.	.	.	.	.	.	.	.	.	.	.	.	.	.	-	-	-	-	-	-	-	.	.	.	.	.	.	.	.	.	.	.	.	.	.	.	.	.	G	.	.	T	-
B29	-	-	-	-	-	-	-	-	-	-	-	-	-	-	-	-	-	-	-	-	-	-	-	-	-	-	-	-	-	-	-	-	-	-	-	-	-	-	-	-	-	-	-	-	-	-	-	-	-
B30	.	T	T	.	.	.	.	.	G	.	.	.	.	.	C	.	.	.	.	.	-	-	-	-	-	-	-	.	A	.	.	.	.	.	.	.	T	.	.	.	.	.	A	.	.	K	.	-	-
B32	A	G	G	A	.	C	A	T	.	A	C	-	-	-	.	.	.	.	.	.	-	-	-	-	-	-	A	G	.	-	.	.	.	.	.	.	.	.	.	.	.	.	.	.	-	.	.	T	-
B33	-	.	.	.	.	.	.	.	.	.	.	.	.	.	.	.	.	.	.	.	-	-	-	-	-	-	A	G	.	-	.	.	.	.	.	.	.	.	.	.	.	.	.	.	-	.	.	T	-
B34	.	-	-	.	.	.	.	T	A	.	.	.	.	G	G	.	.	.	.	.	-	-	-	-	-	-	-	G	.	A	G	G	.	.	.	.	C	.	T	.	.	.	G	.	A	.	.	G	-
B35	G	A	A	.	.	.	T	T	A	A	.	.	.	.	.	T	.	.	.	.	-	-	-	-	-	-	-	.	.	T	.	.	.	.	A	.	C	.	.	.	.	.	G	.	A	G	.	G	G
B36	.	A	A	.	.	.	.	.	.	.	.	.	.	.	.	.	G	.	.	.	-	-	-	-	-	-	-	.	.	.	.	.	.	.	.	A	.	.	.	.	.	.	.	.	-	.	.	T	-
B37	.	.	.	.	.	.	.	.	.	.	.	.	.	.	.	.	.	.	.	.	-	-	-	-	-	-	A	G	.	-	.	.	.	.	.	.	.	.	.	.	.	.	.	.	-	.	.	T	-
B38	.	T	T	T	.	.	.	.	.	.	.	.	.	.	.	.	.	.	.	.	-	-	-	-	-	-	-	.	.	.	.	A	.	.	.	.	C	.	.	.	.	.	A	.	-	.	.	K	-
B39	.	.	.	.	.	.	.	.	.	.	.	.	.	.	.	.	.	.	.	.	-	-	-	-	-	-	A	G	.	-	.	.	.	.	.	.	T	.	.	.	.	.	.	.	-	C	-	-	-
B41	.	.	.	.	.	.	.	.	.	T	.	.	.	.	.	.	.	.	.	.	-	-	-	-	-	-	-	.	.	.	.	.	.	.	.	.	.	.	.	.	.	.	.	.	-	.	.	T	-
B42	-	.	.	.	.	.	.	.	.	.	.	.	.	.	.	.	.	.	.	.	-	-	-	-	-	-	A	G	.	-	.	.	.	.	.	.	.	.	.	.	.	.	.	.	-	.	.	K	-
B43	-	-	-	-	-	-	-	-	-	-	-	-	-	-	-	-	-	-	-	-	-	-	-	-	-	-	-	-	-	-	-	-	-	-	-	-	-	-	-	-	-	-	-	-	-	-	-	-	-
B44	-	.	.	.	.	.	.	.	.	.	.	.	.	.	.	.	.	.	.	.	-	-	-	-	-	-	A	G	.	-	.	.	.	.	.	.	.	.	.	.	.	.	.	.	-	.	.	T	-
D48	-	.	.	.	.	.	.	.	.	.	.	.	.	.	.	.	.	.	.	.	-	-	-	-	-	-	A	G	.	-	.	.	.	.	.	.	M	.	.	.	.	.	.	.	-	.	.	T	-
D49	.	.	.	.	.	.	.	.	.	.	.	.	.	.	.	.	.	.	.	.	-	-	-	-	-	-	A	G	.	-	.	.	.	.	.	.	.	.	.	.	.	.	.	T	-	C	-	-	-
D50	.	.	.	.	.	.	.	.	.	.	.	.	.	.	.	.	.	.	.	.	-	-	-	-	-	-	A	G	.	-	.	.	.	.	.	.	.	.	.	.	.	.	.	.	-	C	-	-	-
D51	-	-	-	-	-	-	-	-	-	-	-	-	-	-	-	-	-	-	-	-	-	-	-	-	-	-	-	-	-	-	-	-	-	-	-	-	-	-	-	-	-	-	-	-	-	-	-	-	-
D52	.	.	.	.	.	.	.	.	.	.	.	.	.	.	.	.	.	.	.	.	-	-	-	-	-	-	A	G	.	-	.	.	.	.	.	.	.	.	.	.	.	.	.	.	-	C	-	-	-
D53	.	.	G	.	.	.	.	.	.	.	.	.	.	.	.	.	.	.	.	.	-	-	-	-	-	-	A	G	.	-	.	.	.	.	.	.	.	.	.	.	.	.	.	.	-	.	.	T	-
D54	.	.	G	.	.	.	.	.	.	.	.	.	.	.	.	.	.	.	.	.	-	-	-	-	-	-	A	G	.	-	.	.	.	.	.	.	.	.	.	.	.	.	.	.	-	.	.	T	-
D55	A	R	.	.	G	G	C	T	.	A	.	.	T	T	C	A	G	C	.	G	-	-	-	-	-	-	-	-	.	T	.	.	.	C	C	.	C	.	.	T	G	A	.	C	-	-	-	C	G
D56	.	.	G	.	.	.	.	.	G	.	.	.	.	.	.	.	.	.	.	.	-	-	-	-	-	-	A	G	.	-	.	.	.	T	.	.	.	.	.	.	.	C	C	.	-	C	-	-	-
E57	.	.	.	.	.	.	.	.	.	.	.	.	.	.	.	.	.	.	.	.	-	-	-	-	-	-	A	G	.	-	.	.	.	.	.	.	.	.	.	.	.	.	.	.	-	C	-	-	-
E58	.	.	.	.	.	.	.	.	.	.	.	.	.	.	.	.	.	.	.	.	-	-	-	-	-	-	A	G	.	-	.	.	.	.	.	.	.	.	.	.	.	.	.	.	-	C	-	-	-
F59	.	.	.	.	.	.	.	.	.	.	.	.	.	.	.	.	.	.	.	.	-	-	-	-	-	-	A	.	A	C	.	A	G	G	.	.	T	.	.	.	T	A	G	.	-	.	-	-	-
F60	.	.	.	.	.	.	.	.	.	.	.	.	.	.	.	.	.	.	.	.	-	-	-	-	-	-	A	G	.	-	.	.	.	.	.	.	.	.	.	.	.	.	.	.	-	C	-	-	-
F61	.	.	.	.	.	.	.	.	.	.	.	.	.	.	.	.	.	.	.	.	-	-	-	-	-	-	A	G	.	-	.	.	.	.	.	.	.	.	.	.	.	.	.	.	-	C	-	-	-
F62	-	A	G	.	A	.	.	.	.	.	.	G	T	.	.	.	.	.	.	.	-	-	-	-	-	-	-	.	.	.	.	.	.	.	.	.	.	.	.	.	.	.	.	.	-	-	-	-	C
F63	.	.	.	.	.	.	.	.	.	.	.	.	.	.	.	.	.	.	.	.	-	-	-	-	-	-	A	G	.	-	.	.	.	.	.	.	.	.	.	.	.	.	.	.	-	C	-	-	-
G64	.	.	.	.	.	.	.	.	.	.	.	.	.	.	.	.	.	.	.	.	-	-	-	-	-	-	A	G	.	-	.	.	.	.	.	.	.	.	.	.	.	.	.	.	-	C	-	-	-
G65	-	.	.	.	.	.	.	.	.	.	.	.	.	.	.	.	.	.	.	.	-	-	-	-	-	-	-	.	.	.	.	.	.	.	.	.	.	.	.	.	.	.	.	.	-	.	.	T	-
G66	A	G	G	A	.	C	.	.	.	.	.	.	.	.	.	.	.	.	.	.	-	-	-	-	-	-	A	G	.	-	.	.	.	.	.	.	.	.	.	.	.	.	.	.	-	.	.	T	-
G67	.	A	T	C	G	.	.	.	G	.	.	.	.	.	.	C	.	.	.	.	-	-	-	-	-	-	A	G	.	-	.	.	.	.	.	.	.	T	.	.	.	.	.	.	-	C	-	-	-
G68	A	G	G	A	.	.	.	.	.	.	.	.	.	.	.	.	.	.	.	.	-	-	-	-	-	-	A	G	.	-	.	.	.	.	.	.	.	.	.	.	.	.	.	.	-	C	-	-	-
G69	.	.	.	.	.	.	.	.	.	.	.	.	.	.	.	.	.	.	.	.	-	-	-	-	-	-	A	G	.	-	.	.	.	.	.	.	.	.	.	.	.	.	.	.	-	.	.	T	-
G70	.	.	Y	.	.	.	.	.	.	.	.	R	.	.	.	.	.	.	.	.	-	-	-	-	-	-	A	G	.	-	.	.	.	.	.	.	.	.	Y	.	.	.	.	.	-	C	-	-	-
J74	.	.	.	.	.	.	.	.	.	.	.	.	.	.	.	.	.	.	.	.	-	-	-	-	-	-	A	G	.	-	.	.	.	.	.	.	.	.	.	.	.	.	.	.	-	C	-	-	-
J76	.	.	.	.	.	.	.	.	.	.	.	.	.	.	.	.	.	.	.	.	-	-	-	-	-	-	A	G	.	-	.	.	.	.	.	.	.	.	.	.	.	.	.	.	-	C	-	-	-
J77	.	.	.	.	.	.	.	.	.	.	.	.	.	.	.	.	.	.	.	.	-	-	-	-	-	-	A	G	.	-	.	.	.	.	.	.	.	.	.	.	.	.	.	.	-	C	-	-	-
J78	.	.	.	.	.	.	.	.	.	.	.	G	.	T	.	.	.	.	.	.	-	-	-	-	-	-	-	.	.	.	.	.	.	.	.	.	.	.	.	.	.	.	.	.	-	.	.	T	-
J79	.	.	.	.	.	.	.	.	.	.	.	.	.	.	.	.	T	.	.	.	-	-	-	-	-	-	-	.	.	.	.	.	.	.	.	.	.	.	.	.	.	.	.	.	-	.	.	T	-
J80	.	.	.	.	.	.	.	.	.	.	.	.	.	.	.	.	.	.	.	.	-	-	-	-	-	-	A	G	.	-	.	.	.	.	.	.	.	.	.	.	.	.	.	.	-	C	-	-	-
J81	.	G	G	.	.	.	.	C	.	.	.	.	.	G	.	A	G	.	.	.	-	-	-	-	-	-	-	.	.	.	.	.	.	.	G	A	G	T	G	.	.	.	.	.	-	.	.	T	-
J82	-	.	.	.	.	.	.	.	.	.	.	.	.	.	.	.	.	.	.	.	-	-	-	-	-	-	A	G	.	-	.	.	.	.	.	.	.	.	.	.	.	.	.	.	-	.	.	T	-
J83	-	.	.	.	.	.	.	.	.	.	.	.	.	.	.	.	.	.	.	.	-	-	-	-	-	-	A	G	.	-	.	.	.	.	.	.	.	.	.	.	.	.	.	.	-	.	.	T	-
J84	-	.	.	.	.	.	.	.	.	.	.	.	.	.	.	.	.	.	.	.	-	-	-	-	-	-	A	G	.	-	.	.	.	.	.	.	.	.	.	.	.	.	.	.	-	.	.	T	-
J85	A	G	G	A	.	C	A	T	.	A	-	-	-	-	.	.	.	.	.	.	-	-	-	-	-	-	A	G	.	-	.	.	.	.	.	.	.	.	.	.	.	.	.	.	-	.	.	T	-
F86	-	.	.	.	.	.	.	.	.	.	.	.	.	.	.	.	.	.	.	.	-	-	-	-	-	-	A	G	.	-	.	.	.	.	.	.	.	.	.	.	.	.	.	.	-	.	.	T	-
KU855474.1	C	.	.	A	C	.	.	A	A	A	G	.	.	.	C	.	.	.	A	.	C	A	-	-	-	-	G	G	T	T	.	C	A	.	C	G	T	T	T	.	G	.	G	.	G	C	G	A	G
	1	1	1	1	1	1	1	1	1	1	1	1	1	1	1	1	1	1	1	1	1	1	1	1	1	1	1	1	1	1	1	1	1	1	1	1	1	1	1	1	1	1	1	2	2	2	2	2	2
	5	5	5	6	6	6	6	6	6	6	6	6	6	7	7	7	7	7	7	7	7	7	7	8	8	8	8	8	8	8	8	8	8	9	9	9	9	9	9	9	9	9	9	0	0	0	0	0	0
	7	8	9	0	1	2	3	4	5	6	7	8	9	0	1	2	3	4	5	6	7	8	9	0	1	2	3	4	5	6	7	8	9	0	1	2	3	4	5	6	7	8	9	0	1	2	3	4	5
Ab1	-	-	-	S	T	Y	C	T	C	C	C	A	T	C	S	G	M	R	-	T	S	T	A	T	T	T	G	T	A	C	-	-	C	M	T	G	K	K	K	C	-	T	T	S	-	-	-	-	-
Ab2	-	-	-	G	.	C	.	.	.	.	.	.	Y	.	C	.	T	G	-	.	Y	.	.	.	.	.	.	.	.	.	-	-	.	C	.	.	T	T	G	.	-	.	.	C	-	-	-	-	-
Ab3	-	-	-	G	.	S	.	K	M	M	Y	.	Y	.	G	.	T	G	-	Y	C	.	.	.	.	.	.	.	.	.	-	-	.	C	.	.	.	T	G	S	-	.	.	M	-	-	-	-	-
Ab4	-	-	-	-	-	-	-	-	Y	.	.	.	W	.	C	.	T	G	-	W	Y	.	-	Y	.	.	.	.	.	.	-	-	.	C	.	.	T	T	G	.	-	.	.	C	-	-	-	-	-
Ab6	-	-	-	A	.	C	Y	.	A	T	.	.	C	.	T	.	G	T	G	K	M	W	M	W	K	K	.	G	G	.	T	T	.	C	C	.	T	T	G	G	-	-	.	T	-	-	-	-	-
Ab7	-	-	-	G	.	C	.	.	M	.	.	M	.	M	C	.	T	Y	-	.	K	.	.	.	.	W	.	.	W	.	-	-	.	C	.	.	S	T	G	S	-	.	.	W	-	-	-	-	-
Ab8	-	-	-	G	.	C	.	.	.	.	.	.	.	.	C	.	T	G	-	.	C	.	.	.	.	.	.	.	.	.	-	-	.	C	.	S	T	T	G	S	C	.	K	C	-	-	-	-	-
Ab9	-	-	-	G	.	C	.	.	.	.	.	.	.	.	C	.	T	G	-	.	C	.	.	.	.	.	.	.	.	.	-	-	.	C	.	.	T	T	G	.	-	.	.	C	-	-	-	-	-
Ab10	-	-	-	G	.	C	.	.	.	.	.	.	.	.	C	.	T	G	-	.	C	.	.	.	.	.	.	.	.	.	-	-	.	C	.	.	T	T	G	.	-	.	.	C	-	-	-	-	-
Ab11	-	-	-	-	-	-	-	-	-	-	-	.	A	A	G	.	T	T	-	G	G	G	G	.	.	G	.	G	-	-	-	-	-	-	-	-	-	-	-	-	-	-	-	-	-	-	-	-	-
Ab12	-	-	-	G	.	C	.	.	.	.	.	.	.	.	C	.	T	G	-	.	C	.	.	.	.	.	.	.	.	.	-	-	.	C	.	.	T	T	G	.	-	.	.	C	-	-	-	-	-
Ab13	-	-	T	T	.	A	A	A	A	A	A	.	C	A	G	.	T	T	-	.	.	G	G	.	C	A	A	G	.	.	C	C	Y	C	A	.	C	A	G	.	G	.	.	T	T	A	A	A	A
Ab14	-	-	-	-	-	-	.	.	.	T	A	C	A	A	C	.	T	G	-	.	T	.	G	.	.	.	.	.	G	R	A	-	.	.	.	S	C	.	.	G	G	S	.	A	T	C	C	T	W
G16	T	C	C	G	.	C	.	.	.	.	.	.	.	.	C	.	A	G	-	.	C	.	.	.	.	.	.	.	.	.	-	-	.	C	.	.	T	T	G	.	-	.	.	C	-	-	-	-	-
G17	-	-	-	G	.	C	.	.	.	.	Y	.	.	Y	.	.	W	S	-	Y	C	.	R	.	.	.	.	.	K	.	-	-	.	C	.	K	T	T	G	S	-	.	.	C	-	-	-	-	-
Ab19	-	-	-	G	.	C	.	.	.	.	.	.	.	.	C	.	T	G	-	.	C	.	.	.	.	.	.	.	.	.	-	-	.	C	.	.	T	T	G	.	-	.	.	C	-	-	-	-	-
Ab20	-	-	-	G	.	C	.	.	.	.	.	.	.	.	C	.	T	G	-	.	C	.	.	.	.	.	.	.	.	.	-	-	.	C	.	.	T	T	G	.	-	.	.	M	-	-	-	-	-
Ab21	-	-	-	G	.	C	.	.	.	.	.	.	.	.	C	.	T	G	-	.	T	.	.	.	.	Y	.	.	.	S	-	-	M	.	Y	R	T	W	S	.	-	.	W	M	-	-	-	-	-
B22	-	-	-	.	.	C	.	Y	.	.	.	.	.	S	Y	.	T	G	-	.	M	.	W	.	.	.	.	.	M	.	-	-	.	S	.	.	T	T	G	Y	-	.	.	Y	-	-	-	-	-
B24	-	-	-	G	.	C	.	.	.	.	.	.	.	.	C	.	T	G	-	.	C	.	.	.	.	.	.	.	.	.	-	-	.	C	.	.	T	T	G	.	-	.	.	C	-	-	-	-	-
B25	-	-	-	G	.	C	.	.	.	.	.	.	.	.	C	.	T	G	-	.	C	.	.	.	.	.	.	.	.	.	-	-	.	C	.	.	T	T	G	Y	-	.	.	C	-	-	-	-	-
B26	-	-	-	G	.	C	.	.	.	.	.	.	.	.	C	.	T	G	-	.	C	.	.	.	.	.	.	.	.	.	-	-	.	C	.	.	T	T	G	.	-	.	.	C	-	-	-	-	-
B27	-	-	-	G	.	C	.	.	.	.	.	.	.	.	C	.	T	G	-	.	C	.	.	.	.	.	.	.	.	.	-	-	.	C	.	.	T	T	G	.	-	.	.	C	-	-	-	-	-
B28	-	-	-	G	.	C	.	.	.	.	.	.	.	.	C	.	T	G	-	.	C	.	.	.	.	.	.	.	.	.	-	-	.	C	.	.	T	T	G	.	-	.	.	C	-	-	-	-	-
B29	C	C	T	.	Y	.	A	.	T	.	G	G	C	S	G	.	T	G	-	.	C	.	.	.	Y	C	A	.	.	.	-	-	.	C	.	.	T	T	G	M	-	.	.	C	-	-	-	-	-
B30	-	-	-	.	.	C	.	Y	.	.	.	M	Y	.	C	.	T	G	-	.	.	.	.	.	.	.	.	.	R	.	-	-	.	C	Y	.	T	.	.	Y	-	.	.	Y	-	-	-	-	-
B32	-	-	-	G	.	C	.	.	.	.	.	.	.	.	C	.	T	G	-	.	C	.	.	.	.	.	.	.	.	.	-	-	.	C	.	.	T	T	G	.	-	.	.	C	-	-	-	-	-
B33	-	-	-	G	.	C	.	.	.	.	.	.	.	.	C	.	T	G	-	.	C	.	.	.	.	.	.	.	.	.	-	-	.	C	.	.	T	T	G	.	-	.	.	C	G	G	C	G	G
B34	W	T	C	G	.	C	.	.	.	.	Y	.	.	.	C	K	.	S	C	.	Y	.	R	.	.	K	K	.	T	.	-	-	.	C	K	.	.	T	S	.	T	.	Y	.	-	-	-	-	-
B35	T	C	C	G	K	C	S	.	.	.	.	W	.	.	C	S	T	G	-	.	C	G	W	.	.	.	.	.	Y	.	-	-	.	C	.	S	.	T	.	S	T	.	Y	Y	-	-	-	-	-
B36	-	-	-	.	Y	C	S	.	.	.	.	.	.	.	C	.	W	G	-	Y	C	.	.	.	.	.	.	.	.	.	-	-	.	Y	.	.	T	T	G	M	-	.	.	C	-	-	-	-	-
B37	-	-	-	G	.	C	.	.	.	.	.	.	.	.	C	.	T	G	-	.	C	.	.	.	.	.	.	.	.	.	-	-	.	C	.	.	T	T	G	.	-	.	.	C	-	-	-	-	-
B38	-	-	S	G	.	C	.	.	.	.	Y	M	Y	.	C	.	W	G	-	.	Y	.	W	.	.	K	K	.	T	.	-	-	.	C	.	.	.	T	.	Y	-	.	.	Y	-	-	-	-	-
B39	-	-	-	-	-	-	-	-	M	.	.	W	.	.	C	K	T	G	-	.	M	.	-	C	.	.	.	.	.	Y	-	-	Y	Y	.	.	C	S	G	S	-	W	W	C	-	-	-	-	-
B41	-	-	-	G	Y	C	.	.	.	.	.	.	.	.	C	.	K	G	-	.	Y	.	.	.	.	.	.	.	.	.	-	-	.	Y	.	.	T	T	G	S	-	.	.	.	-	-	-	-	-
B42	-	-	-	G	.	C	.	.	.	.	.	.	.	.	C	.	T	G	-	.	C	.	.	.	.	.	.	.	.	.	-	-	.	C	.	.	T	T	G	.	-	.	.	C	-	-	-	-	-
B43	-	-	-	-	-	-	-	.	.	.	.	.	.	.	C	.	T	G	-	C	C	.	.	.	.	C	-	.	.	G	-	-	.	C	.	.	T	T	G	.	-	.	.	C	-	-	-	-	-
B44	-	-	-	G	.	C	.	.	.	.	.	.	.	.	C	.	T	G	-	.	C	.	.	.	.	.	.	.	.	.	-	-	.	C	.	.	T	T	G	.	-	.	.	C	-	-	-	-	-
D48	-	-	-	G	.	C	.	.	.	.	.	.	.	.	C	.	T	G	-	.	C	.	.	.	.	.	.	.	.	.	-	-	.	C	.	.	T	T	G	.	-	.	.	C	-	-	-	-	-
D49	-	-	-	-	-	-	-	.	.	.	.	.	.	.	C	.	T	G	-	.	C	.	.	.	.	C	A	.	.	.	-	-	.	C	.	.	T	T	R	S	-	.	.	C	-	-	-	-	-
D50	-	-	-	-	-	-	-	.	.	.	.	.	.	.	C	.	T	G	-	.	C	.	.	.	.	C	A	.	.	.	-	-	.	C	.	.	T	T	G	.	-	.	.	C	-	-	-	-	-
D51	-	-	-	-	-	-	-	-	.	.	.	.	.	.	C	.	T	G	-	.	C	.	-	C	.	.	.	.	C	.	-	-	.	-	.	.	T	T	G	G	-	.	.	C	-	-	-	-	-
D52	-	-	-	-	-	-	-	.	.	.	.	.	.	.	C	.	T	G	-	.	C	.	.	.	.	C	A	.	.	.	-	-	.	C	.	.	T	T	G	.	-	.	.	C	-	-	-	-	-
D53	-	-	-	G	.	C	.	.	.	.	.	.	.	.	C	.	T	G	-	.	C	.	.	.	.	.	.	.	W	.	-	-	.	C	.	.	T	T	G	S	-	.	.	C	-	-	-	-	-
D54	-	-	-	G	.	C	.	.	.	.	.	.	.	.	C	.	T	G	-	.	C	.	.	.	.	.	.	.	W	.	-	-	.	C	.	.	T	T	G	S	-	.	.	C	-	-	-	-	-
D55	-	-	-	-	-	-	-	-	-	-	-	.	A	A	G	.	T	T	-	G	G	G	G	.	.	G	.	G	-	-	-	-	-	-	-	-	-	-	-	-	-	-	-	-	-	-	-	-	-
D56	-	-	-	-	-	-	-	-	.	.	.	.	.	.	.	.	T	G	-	.	Y	.	-	Y	.	.	.	.	M	.	-	-	.	C	.	.	T	T	.	K	-	.	.	C	-	-	-	-	-
E57	-	-	-	-	-	-	-	.	.	.	.	.	.	.	C	.	T	G	-	.	C	.	.	.	.	C	A	.	.	.	-	-	.	C	.	.	T	T	G	.	-	.	.	C	-	-	-	-	-
E58	-	-	-	-	-	-	-	.	.	.	.	.	.	.	C	.	T	G	-	.	C	.	.	.	.	C	A	.	.	.	-	-	.	C	.	.	T	T	G	.	-	.	.	C	-	-	-	-	-
F59	-	-	-	-	-	-	-	G	T	G	A	.	C	.	T	.	C	G	-	G	A	A	.	W	.	C	A	.	.	.	-	-	.	C	.	.	T	T	G	T	-	.	.	C	-	-	-	-	-
F60	-	-	-	-	-	-	-	-	.	.	.	.	.	.	C	.	T	G	-	.	C	.	.	.	C	.	.	.	.	.	-	-	.	C	K	.	T	.	G	Y	-	.	.	C	-	-	-	-	-
F61	-	-	-	-	-	-	-	-	.	.	.	.	.	.	C	.	T	G	-	.	C	.	-	C	.	.	.	.	.	.	-	-	.	C	.	.	T	T	G	.	-	.	.	C	-	-	-	-	-
F62	-	-	-	-	-	C	.	.	.	.	.	.	.	.	C	.	T	G	-	.	C	.	.	.	.	C	A	.	.	.	-	-	.	C	.	.	T	T	G	.	-	.	.	Y	-	-	-	-	-
F63	T	C	C	A	A	C	.	.	.	.	.	.	.	.	C	.	T	G	-	.	C	.	.	.	.	C	A	.	.	.	-	-	.	C	.	.	T	T	G	.	-	.	.	C	-	-	-	-	-
G64	-	-	-	-	-	-	-	.	.	.	.	.	.	.	C	.	T	G	-	.	C	.	.	.	.	C	A	.	.	.	-	-	.	C	.	.	T	T	G	.	-	.	.	C	-	-	-	-	-
G65	-	-	-	G	.	C	.	.	.	.	.	.	.	.	C	.	T	G	-	.	C	.	.	.	.	.	.	.	.	.	-	-	.	C	.	.	T	T	G	.	-	.	.	C	-	-	-	-	-
G66	-	-	-	G	.	C	.	.	.	.	.	.	.	.	C	.	T	G	-	.	C	.	.	.	.	.	.	.	.	.	-	-	.	C	.	.	T	T	G	.	-	.	.	C	-	-	-	-	-
G67	-	-	-	-	-	-	-	-	.	.	.	M	.	.	.	.	T	G	-	.	Y	.	-	Y	.	.	.	.	.	.	-	-	.	C	.	.	T	T	G	Y	-	.	.	C	-	-	-	-	-
G68	-	-	-	-	-	-	-	.	.	.	.	.	.	.	C	.	T	G	-	.	C	.	.	.	.	C	A	.	.	.	-	-	.	C	.	.	T	T	G	.	-	.	.	C	-	-	-	-	-
G69	-	-	-	G	.	C	.	.	.	.	.	.	.	.	C	.	T	G	-	.	C	.	.	.	.	.	.	.	.	.	-	-	.	C	.	.	T	T	G	.	-	.	.	C	-	-	-	-	-
G70	-	-	-	-	-	-	-	.	.	.	.	.	.	.	C	.	T	G	-	Y	C	.	.	.	.	C	A	.	.	.	-	-	.	C	.	.	T	T	G	.	-	.	.	C	-	-	-	-	-
J74	-	-	-	-	-	-	-	-	.	.	.	.	.	.	C	.	T	G	-	.	C	.	-	C	.	.	.	.	.	.	-	-	.	C	.	.	T	T	G	.	-	.	.	C	-	-	-	-	-
J76	-	-	-	-	-	-	-	.	.	.	.	.	.	.	C	.	T	G	-	.	C	.	.	.	.	C	A	.	.	.	-	-	.	C	.	.	T	T	G	.	-	.	.	C	-	-	-	-	-
J77	-	-	-	-	-	-	-	.	.	.	.	.	.	.	C	.	T	G	-	.	C	.	.	.	.	C	A	.	.	.	-	-	.	C	.	.	T	T	G	.	-	.	.	C	-	-	-	-	-
J78	-	-	-	G	.	C	.	.	.	.	.	.	.	.	C	.	T	G	-	.	Y	.	.	.	.	.	.	.	W	.	-	-	.	C	.	.	T	T	G	Y	-	.	.	.	-	-	-	-	-
J79	-	-	-	G	.	C	.	.	.	.	.	.	.	.	C	.	T	G	-	.	T	.	.	.	.	.	.	.	.	.	-	-	.	C	.	.	T	T	G	Y	-	.	.	Y	-	-	-	-	-
J80	-	-	-	-	-	-	-	-	.	.	.	.	.	.	C	.	T	G	-	.	C	.	-	C	.	Y	S	.	.	.	-	-	.	C	.	.	T	T	G	.	-	.	.	C	-	-	-	-	-
J81	-	-	-	G	.	C	.	.	.	.	.	M	.	Y	C	.	T	G	-	.	W	.	.	.	.	Y	.	.	G	.	-	-	.	C	.	.	T	T	G	S	-	.	.	.	-	-	-	-	-
J82	-	-	-	G	.	C	.	.	.	.	.	.	.	.	C	.	T	G	-	.	C	.	.	.	.	.	.	.	.	.	-	-	.	C	.	.	T	T	G	.	-	.	.	C	-	-	-	-	-
J83	-	-	-	G	.	C	.	.	.	.	.	.	.	.	C	.	T	G	-	.	C	.	.	.	.	.	.	.	.	.	-	-	.	C	.	.	T	T	G	.	-	.	.	C	-	-	-	-	-
J84	-	-	-	G	.	C	.	.	.	.	.	.	.	.	C	.	T	G	-	.	C	.	.	.	.	.	.	.	.	.	-	-	.	C	.	.	T	T	G	.	-	.	.	C	-	-	-	-	-
J85	-	-	-	G	.	C	.	.	.	.	.	.	.	.	C	.	T	G	-	.	C	.	.	.	.	.	.	.	.	.	-	-	.	C	.	.	T	T	G	.	-	.	.	C	-	-	-	-	-
F86	-	-	-	G	.	C	.	.	.	.	.	.	.	.	C	.	T	G	-	.	C	.	.	.	.	.	.	.	.	.	-	-	.	C	.	.	T	T	G	.	-	.	.	C	-	-	-	-	-
KU855474.1	-	-	-	-	-	-	.	C	.	.	A	C	G	Y	C	.	A	G	A	G	C	G	C	G	.	G	.	.	T	T	T	G	.	C	C	C	G	C	G	T	C	C	.	C	-	-	-	-	-
	2	2	2	2	2	2	2	2	2	2	2	2	2	2	2	2	2	2	2	2	2	2	2	2	2	2	2	2	2	2	2	2	2	2	2	2	2	2	2	2	2	2	2	2	2	2	2	2	2
	3	3	3	3	3	4	4	4	4	4	4	4	4	4	4	5	5	5	5	5	5	5	5	5	5	6	6	6	6	6	6	6	6	6	6	7	7	7	7	7	7	7	7	7	7	8	8	8	8
	5	6	7	8	9	0	1	2	3	4	5	6	7	8	9	0	1	2	3	4	5	6	7	8	9	0	1	2	3	4	5	6	7	8	9	0	1	2	3	4	5	6	7	8	9	0	1	2	3
Ab1	-	-	-	-	-	-	-	-	-	-	-	-	-	-	-	-	G	K	C	G	G	S	-	-	-	-	C	Y	C	S	M	C	-	-	-	-	-	-	-	-	-	-	-	-	-	-	-	-	Y
Ab2	-	-	-	-	-	-	-	-	-	-	-	-	-	-	-	-	R	G	.	.	.	G	-	-	-	-	.	C	.	G	C	.	-	-	-	-	-	-	-	-	-	-	-	-	-	-	-	-	C
Ab3	-	-	-	-	-	-	-	-	-	-	-	-	-	-	-	-	S	G	Y	K	R	G	-	-	-	-	.	C	.	R	C	.	-	-	-	-	-	-	-	-	-	-	-	-	-	-	-	-	M
Ab4	-	-	-	-	-	-	-	-	-	-	-	-	-	-	-	-	.	G	.	.	.	G	-	-	-	-	.	C	.	K	C	.	-	-	-	-	-	-	-	-	-	-	-	-	-	-	-	-	-
Ab6	-	-	-	-	-	-	-	-	-	-	-	-	-	-	-	-	.	S	.	C	S	T	-	-	-	-	.	T	.	G	G	.	G	G	-	-	-	-	-	-	-	-	-	-	-	-	-	-	A
Ab7	-	-	-	-	-	-	-	-	-	-	-	-	-	-	-	-	.	.	G	.	.	G	-	-	-	-	.	C	S	C	C	.	-	-	-	-	-	-	-	-	-	-	-	-	-	-	-	-	.
Ab8	-	-	-	-	-	-	-	-	-	-	-	-	-	-	-	-	.	G	S	.	.	G	W	K	T	T	.	C	Y	K	C	.	-	-	-	-	-	-	-	-	-	-	-	-	-	-	-	-	C
Ab9	-	-	-	-	-	-	-	-	-	-	-	-	-	-	-	-	.	G	.	.	.	G	-	-	-	-	.	C	.	G	C	.	-	-	-	-	-	-	-	-	-	-	-	-	-	-	-	-	C
Ab10	-	-	-	-	-	-	-	-	-	-	-	-	-	-	-	-	.	G	.	.	.	G	-	-	-	-	.	C	.	G	C	.	-	-	-	-	-	-	-	-	-	-	-	-	-	-	-	-	C
Ab11	A	C	C	T	A	C	A	G	G	A	G	C	G	G	G	T	.	A	.	A	A	A	A	A	A	A	G	T	T	G	C	T	T	C	C	C	A	T	A	C	-	-	-	-	-	-	-	G	C
Ab12	-	-	-	-	-	-	-	-	-	-	-	-	-	-	-	-	.	G	.	.	.	G	-	-	-	-	.	C	.	G	C	.	-	-	-	-	-	-	-	-	-	-	-	-	-	-	-	-	C
Ab13	A	C	C	C	T	C	M	G	C	A	G	C	G	G	G	T	.	R	S	R	W	R	A	M	G	T	G	A	-	G	C	T	T	C	C	Y	A	T	A	C	A	-	-	-	-	-	-	K	M
Ab14	-	-	-	-	-	-	-	-	-	-	-	-	-	-	-	-	T	C	Y	.	W	K	G	Y	T	T	.	S	G	G	S	.	-	-	-	-	-	-	-	-	-	-	-	-	-	-	-	-	-
G16	-	-	-	-	-	-	-	-	-	-	-	-	-	-	-	-	.	G	.	.	.	G	-	-	-	-	S	C	.	G	.	.	-	-	-	-	-	-	-	-	-	-	-	-	-	-	-	-	C
G17	-	-	-	-	-	-	-	-	-	-	-	-	-	-	-	-	S	G	K	.	.	G	-	-	-	-	S	C	.	C	C	.	-	-	-	-	-	-	-	-	-	-	-	-	-	-	-	-	C
Ab19	-	-	-	-	-	-	-	-	-	-	-	-	-	-	-	-	.	G	.	.	.	G	-	-	-	-	.	C	.	G	C	.	-	-	-	-	-	-	-	-	-	-	-	-	-	-	-	-	C
Ab20	-	-	-	-	-	-	-	-	-	-	-	-	-	-	-	-	.	G	.	.	.	G	-	-	-	-	.	C	.	G	C	.	-	-	-	-	-	-	-	-	-	-	-	-	-	-	-	-	C
Ab21	-	-	-	-	-	-	-	-	-	-	-	-	-	-	-	-	R	R	.	.	K	K	-	-	-	-	S	S	Y	G	C	.	-	-	-	-	-	-	-	-	-	-	-	-	-	-	-	-	S
B22	-	-	-	-	-	-	-	-	-	-	-	-	-	-	-	-	.	G	S	.	.	G	-	-	-	-	.	C	.	.	C	.	-	-	-	-	-	-	-	-	-	-	-	-	-	-	-	-	C
B24	-	-	-	-	-	-	-	-	-	-	-	-	-	-	-	-	.	G	.	.	.	G	-	-	-	-	.	C	.	G	C	.	-	-	-	-	-	-	-	-	-	-	-	-	-	-	-	-	C
B25	-	-	-	-	-	-	-	-	-	-	-	-	-	-	-	-	.	G	.	.	.	G	-	-	-	-	.	C	.	.	C	.	-	-	-	-	-	-	-	-	-	-	-	-	-	-	-	-	C
B26	-	-	-	-	-	-	-	-	-	-	-	-	-	-	-	-	.	G	.	.	.	G	-	-	-	-	S	C	.	G	C	.	-	-	-	-	-	-	-	-	-	-	-	-	-	-	-	-	C
B27	-	-	-	-	-	-	-	-	-	-	-	-	-	-	-	-	.	G	.	.	.	G	-	-	-	-	.	C	.	G	C	.	-	-	-	-	-	-	-	-	-	-	-	-	-	-	-	-	C
B28	-	-	-	-	-	-	-	-	-	-	-	-	-	-	-	-	.	G	.	.	.	G	-	-	-	-	.	C	.	G	C	.	-	-	-	-	-	-	-	-	-	-	-	-	-	-	-	-	C
B29	-	-	-	-	-	-	-	-	-	-	-	-	-	-	-	-	.	G	.	.	.	G	-	-	-	-	.	C	.	G	C	.	G	G	C	T	G	C	C	C	C	T	C	C	T	G	G	G	G
B30	-	-	-	-	-	-	-	-	-	-	-	-	-	-	-	-	.	G	S	.	.	G	-	-	-	-	.	C	.	.	C	.	-	-	-	-	-	-	-	-	-	-	-	-	-	-	-	-	C
B32	-	-	-	-	-	-	-	-	-	-	-	-	-	-	-	-	.	G	.	.	.	G	-	-	-	-	.	C	.	G	C	.	-	-	-	-	-	-	-	-	-	-	-	-	-	-	-	-	C
B33	T	G	T	A	C	C	C	T	G	T	T	G	C	T	T	C	.	G	.	.	.	G	-	-	-	-	.	C	.	G	C	.	-	-	-	-	-	-	-	-	-	-	-	-	-	-	-	-	C
B34	-	-	-	-	-	-	-	-	-	-	-	-	-	-	-	-	-	G	Y	.	.	G	-	-	-	-	G	C	.	G	C	.	-	-	-	-	-	-	-	-	-	-	-	-	-	-	-	-	C
B35	-	-	-	-	-	-	-	-	-	-	-	-	-	-	-	-	-	.	T	.	.	G	-	-	-	-	.	C	.	G	C	.	-	-	-	-	-	-	-	-	-	-	-	-	-	-	-	-	C
B36	-	-	-	-	-	-	-	-	-	-	-	-	-	-	-	-	.	G	S	.	.	.	-	-	-	-	.	C	.	G	C	.	-	-	-	-	-	-	-	-	-	-	-	-	-	-	-	-	.
B37	-	-	-	-	-	-	-	-	-	-	-	-	-	-	-	-	.	G	.	.	.	G	-	-	-	-	.	C	.	G	C	.	-	-	-	-	-	-	-	-	-	-	-	-	-	-	-	-	C
B38	-	-	-	-	-	-	-	-	-	-	-	-	-	-	-	-	S	G	K	.	.	G	-	-	-	-	S	C	.	.	C	.	-	-	-	-	-	-	-	-	-	-	-	-	-	-	-	-	C
B39	-	-	-	-	-	-	-	-	-	-	-	-	-	-	-	-	.	G	.	.	.	.	-	-	-	-	.	C	.	R	C	M	-	-	-	-	-	-	-	-	-	-	-	-	-	-	-	-	-
B41	-	-	-	-	-	-	-	-	-	-	-	-	-	-	-	-	.	G	.	.	.	G	-	-	-	-	.	C	.	G	C	.	-	-	-	-	-	-	-	-	-	-	-	-	-	-	-	-	C
B42	-	-	-	-	-	-	-	-	-	-	-	-	-	-	-	-	.	G	.	.	.	G	-	-	-	-	.	C	.	G	C	.	-	-	-	-	-	-	-	-	-	-	-	-	-	-	-	-	C
B43	-	-	-	-	-	-	-	-	-	-	-	-	-	-	-	-	C	G	G	.	.	G	-	-	-	-	.	T	.	C	C	.	G	G	G	T	G	C	C	C	C	T	Y	C	T	G	G	K	K
B44	-	-	-	-	-	-	-	-	-	-	-	-	-	-	-	-	.	G	.	.	.	G	-	-	-	-	.	C	.	G	C	.	-	-	-	-	-	-	-	-	-	-	-	-	-	-	-	-	C
D48	-	-	-	-	-	-	-	-	-	-	-	-	-	-	-	-	.	G	.	.	.	G	-	-	-	-	.	C	.	G	C	.	-	-	-	-	-	-	-	-	-	-	-	-	-	-	-	-	C
D49	-	-	-	-	-	-	-	-	-	-	-	-	-	-	-	-	.	G	.	.	.	G	-	-	-	-	.	C	.	G	C	.	G	G	C	T	G	C	C	C	C	T	C	C	T	G	G	G	G
D50	-	-	-	-	-	-	-	-	-	-	-	-	-	-	-	-	.	G	.	.	.	G	-	-	-	-	.	C	.	G	C	.	G	G	C	T	G	C	C	C	C	T	C	C	T	G	G	G	G
D51	-	-	-	-	-	-	-	-	-	-	-	-	-	-	-	-	.	G	.	.	.	G	-	-	-	-	G	C	.	G	C	.	-	-	-	-	-	-	-	-	-	-	-	-	-	-	-	-	-
D52	-	-	-	-	-	-	-	-	-	-	-	-	-	-	-	-	.	G	.	.	.	G	-	-	-	-	.	C	.	G	C	.	G	G	C	T	G	C	C	C	C	T	C	C	T	G	G	G	G
D53	-	-	-	-	-	-	-	-	-	-	-	-	-	-	-	-	.	G	.	.	.	G	-	-	-	-	.	C	.	G	C	.	-	-	-	-	-	-	-	-	-	-	-	-	-	-	-	-	C
D54	-	-	-	-	-	-	-	-	-	-	-	-	-	-	-	-	.	G	.	.	.	G	-	-	-	-	.	C	.	G	C	.	-	-	-	-	-	-	-	-	-	-	-	-	-	-	-	-	C
D55	A	C	C	T	A	C	A	G	G	A	G	C	G	G	G	T	.	A	.	A	A	A	A	A	-	-	G	T	T	G	C	T	T	C	C	C	A	T	A	C	-	-	-	-	-	-	-	G	C
D56	-	-	-	-	-	-	-	-	-	-	-	-	-	-	-	-	.	G	T	.	.	G	-	-	-	-	G	C	Y	Y	C	.	-	-	-	-	-	-	-	-	-	-	-	-	-	-	-	-	-
E57	-	-	-	-	-	-	-	-	-	-	-	-	-	-	-	-	.	G	.	.	.	G	-	-	-	-	.	C	.	G	C	.	G	G	C	T	G	C	C	C	C	T	C	C	T	G	G	G	G
E58	-	-	-	-	-	-	-	-	-	-	-	-	-	-	-	-	.	G	.	.	.	G	-	-	-	-	.	C	.	G	C	.	G	G	C	T	G	C	C	C	C	T	C	C	T	G	G	G	G
F59	-	-	-	-	-	-	-	-	-	-	-	-	-	-	-	-	.	G	S	.	.	G	-	-	-	-	.	C	.	.	C	.	G	G	S	T	G	C	C	C	C	Y	C	C	T	G	G	G	G
F60	-	-	-	-	-	-	-	-	-	-	-	-	-	-	-	-	.	G	S	.	T	G	-	-	-	-	S	C	.	A	C	G	-	-	-	-	-	-	-	-	-	-	-	-	-	-	-	-	-
F61	-	-	-	-	-	-	-	-	-	-	-	-	-	-	-	-	.	G	.	.	.	G	-	-	-	-	.	C	.	G	C	.	-	-	-	-	-	-	-	-	-	-	-	-	-	-	-	-	-
F62	-	-	-	-	-	-	-	-	-	-	-	-	-	-	-	-	.	G	.	.	.	G	-	-	-	-	.	C	.	G	C	.	G	G	C	T	G	C	C	C	C	T	C	C	-	-	-	-	T
F63	-	-	-	-	-	-	-	-	-	-	-	-	-	-	-	-	.	G	.	.	.	G	-	-	-	-	.	C	.	G	C	.	G	G	C	T	G	C	C	C	C	T	C	C	T	G	G	G	G
G64	-	-	-	-	-	-	-	-	-	-	-	-	-	-	-	-	.	G	.	.	.	G	-	-	-	-	.	C	.	G	C	.	G	G	C	T	G	C	C	C	C	T	C	C	T	G	G	G	G
G65	-	-	-	-	-	-	-	-	-	-	-	-	-	-	-	-	.	G	.	.	.	G	-	-	-	-	.	C	.	G	C	.	-	-	-	-	-	-	-	-	-	-	-	-	-	-	-	-	C
G66	-	-	-	-	-	-	-	-	-	-	-	-	-	-	-	-	.	G	.	.	.	G	-	-	-	-	.	C	.	G	C	.	-	-	-	-	-	-	-	-	-	-	-	-	-	-	-	-	C
G67	-	-	-	-	-	-	-	-	-	-	-	-	-	-	-	-	.	G	S	.	.	G	-	-	-	-	S	C	.	Y	S	.	-	-	-	-	-	-	-	-	-	-	-	-	-	-	-	-	-
G68	-	-	-	-	-	-	-	-	-	-	-	-	-	-	-	-	.	G	S	.	.	G	-	-	-	-	.	C	.	G	C	.	G	G	C	T	G	C	C	C	C	T	C	C	T	G	G	G	G
G69	-	-	-	-	-	-	-	-	-	-	-	-	-	-	-	-	.	G	.	.	.	G	-	-	-	-	.	C	.	G	C	.	-	-	-	-	-	-	-	-	-	-	-	-	-	-	-	-	C
G70	-	-	-	-	-	-	-	-	-	-	-	-	-	-	-	-	S	G	S	.	.	G	-	-	-	-	.	.	Y	.	C	.	G	G	S	T	G	C	C	C	C	T	C	C	T	G	G	G	G
J74	-	-	-	-	-	-	-	-	-	-	-	-	-	-	-	-	.	G	Y	.	.	G	-	-	-	-	S	C	.	G	C	.	-	-	-	-	-	-	-	-	-	-	-	-	-	-	-	-	-
J76	-	-	-	-	-	-	-	-	-	-	-	-	-	-	-	-	.	G	.	.	.	G	-	-	-	-	.	C	.	G	C	.	G	G	C	T	G	C	C	C	C	T	C	C	T	G	G	G	G
J77	-	-	-	-	-	-	-	-	-	-	-	-	-	-	-	-	.	G	.	.	.	G	-	-	-	-	.	C	.	G	C	.	G	G	C	T	G	C	C	C	C	T	C	C	T	G	G	G	G
J78	-	-	-	-	-	-	-	-	-	-	-	-	-	-	-	-	R	G	S	.	.	.	-	-	-	-	M	C	.	W	C	.	-	-	-	-	-	-	-	-	-	-	-	-	-	-	-	-	.
J79	-	-	-	-	-	-	-	-	-	-	-	-	-	-	-	-	.	G	.	.	.	G	-	-	-	-	.	C	.	G	C	.	-	-	-	-	-	-	-	-	-	-	-	-	-	-	-	-	C
J80	-	-	-	-	-	-	-	-	-	-	-	-	-	-	-	-	.	G	.	.	.	G	-	-	-	-	.	C	.	G	C	.	-	-	-	-	-	-	-	-	-	-	-	-	-	-	-	-	-
J81	-	-	-	-	-	-	-	-	-	-	-	-	-	-	-	-	.	G	.	.	.	G	-	-	-	-	.	C	.	K	C	.	-	-	-	-	-	-	-	-	-	-	-	-	-	-	-	-	.
J82	-	-	-	-	-	-	-	-	-	-	-	-	-	-	-	-	.	G	.	.	.	G	-	-	-	-	.	C	.	G	C	.	-	-	-	-	-	-	-	-	-	-	-	-	-	-	-	-	C
J83	-	-	-	-	-	-	-	-	-	-	-	-	-	-	-	-	.	G	.	.	.	G	-	-	-	-	.	C	.	G	C	.	-	-	-	-	-	-	-	-	-	-	-	-	-	-	-	-	C
J84	-	-	-	-	-	-	-	-	-	-	-	-	-	-	-	-	.	G	.	.	.	G	-	-	-	-	.	C	.	G	C	.	-	-	-	-	-	-	-	-	-	-	-	-	-	-	-	-	C
J85	-	-	-	-	-	-	-	-	-	-	-	-	-	-	-	-	.	G	.	.	.	G	-	-	-	-	.	C	.	G	C	.	-	-	-	-	-	-	-	-	-	-	-	-	-	-	-	-	C
F86	-	-	-	-	-	-	-	-	-	-	-	-	-	-	-	-	.	G	.	.	.	G	-	-	-	-	.	C	.	G	C	.	-	-	-	-	-	-	-	-	-	-	-	-	-	-	-	-	C
KU855474.1	-	-	-	-	-	-	-	-	-	-	-	-	-	-	-	-	.	G	.	C	A	A	M	A	A	-	.	C	A	A	C	.	-	-	-	-	-	-	-	-	-	-	-	-	-	-	-	-	-
	3	3	3	3	3	3	3	3	3	3	3	3	3	3	3	3	3	3	3	3	3	3	3	3	3	3	3	3	3	3	3	3	3	3	3	3	3	3	3	3	3	3	3	3	3	3	3	3	3
	1	1	1	1	1	1	1	2	2	2	2	2	2	2	2	2	2	3	3	3	3	3	3	3	3	3	3	4	4	4	4	4	4	4	4	4	4	5	5	5	5	5	5	5	5	5	5	6	6
	3	4	5	6	7	8	9	0	1	2	3	4	5	6	7	8	9	0	1	2	3	4	5	6	7	8	9	0	1	2	3	4	5	6	7	8	9	0	1	2	3	4	5	6	7	8	9	0	1
Ab1	-	-	C	C	C	C	C	G	G	-	-	G	M	C	C	-	-	G	T	G	Y	C	C	R	-	Y	-	-	-	-	-	-	M	R	R	A	K	A	C	-	-	-	-	-	M	T	C	A	Y
Ab2	-	-	.	.	.	.	.	.	.	-	-	.	C	.	.	-	-	.	.	.	C	.	.	G	-	C	-	-	-	-	-	-	C	G	G	.	G	.	.	-	-	-	-	-	C	.	.	.	A
Ab3	-	-	.	.	.	M	.	.	.	-	-	.	C	.	.	-	-	S	.	S	C	.	.	G	-	M	-	-	-	-	-	-	C	S	G	M	G	.	.	-	-	-	-	-	C	.	.	.	A
Ab4	-	-	.	.	.	.	.	.	.	-	-	.	C	.	.	-	-	.	C	.	C	.	.	S	-	C	-	-	-	-	-	-	C	G	G	.	R	.	.	-	-	-	-	-	T	C	.	.	A
Ab6	-	-	S	.	.	.	K	S	K	-	-	.	S	.	.	-	-	-	-	.	S	Y	.	G	A	S	A	-	-	-	-	-	C	S	G	G	R	.	.	-	-	-	-	A	C	Y	.	R	A
Ab7	-	-	.	.	.	.	S	.	.	-	-	.	C	A	.	T	-	.	C	A	C	.	.	.	-	.	-	-	-	-	-	-	C	K	G	.	A	R	S	-	-	-	-	-	C	.	Y	.	A
Ab8	-	-	.	.	.	.	.	.	.	-	-	.	C	.	.	-	-	.	.	S	C	.	.	G	-	C	-	-	-	-	-	-	C	G	G	.	G	.	.	-	-	-	-	-	C	.	.	.	M
Ab9	-	-	.	.	.	.	.	.	.	-	-	.	C	.	.	-	-	.	.	.	C	.	.	G	-	C	-	-	-	-	-	-	C	G	G	.	G	.	.	-	-	-	-	-	C	.	.	.	A
Ab10	-	-	.	.	.	.	.	.	.	-	-	.	C	.	.	-	-	.	.	.	C	.	.	G	-	C	-	-	-	-	-	-	C	G	G	.	G	.	.	-	-	-	-	-	C	.	.	.	A
Ab11	-	C	.	T	T	T	.	.	.	-	-	S	C	.	.	-	-	.	.	C	C	.	.	T	T	-	-	-	-	G	G	G	G	G	G	G	G	.	.	G	G	G	G	G	C	S	.	.	A
Ab12	-	-	.	.	.	.	.	.	.	-	-	.	C	.	.	-	-	.	.	.	C	.	.	G	-	C	-	-	-	-	-	-	C	G	G	.	G	.	.	-	-	-	-	-	C	.	.	.	A
Ab13	G	Y	Y	T	T	T	.	.	.	-	-	.	C	.	.	-	-	S	Y	Y	.	.	S	K	T	C	C	Y	G	G	G	M	S	G	G	G	.	R	G	G	G	G	G	G	C	S	.	.	M
Ab14	-	-	M	.	.	Y	G	.	.	G	-	-	-	-	-	-	-	A	Y	S	S	M	.	G	G	R	G	-	-	-	-	-	G	.	A	.	S	G	.	Y	T	T	C	A	T	C	Y	G	M
G16	-	-	.	.	.	.	.	.	.	-	-	.	C	.	.	-	-	.	.	.	C	.	.	G	-	M	-	-	-	-	-	-	C	G	G	.	G	.	.	-	-	-	-	-	C	.	.	.	A
G17	-	-	.	.	.	.	Y	.	.	-	-	.	.	.	M	-	-	R	Y	.	C	.	.	S	-	.	-	-	-	-	-	-	C	G	G	.	S	M	.	-	-	-	-	-	C	.	.	.	A
Ab19	-	-	.	.	.	.	.	.	.	-	-	.	C	.	.	-	-	.	.	.	C	.	.	G	-	C	-	-	-	-	-	-	C	G	G	.	G	.	.	-	-	-	-	-	C	.	.	.	A
Ab20	-	-	.	.	.	.	.	.	.	-	-	.	S	.	.	-	-	.	W	.	C	.	.	G	-	C	-	-	-	-	-	-	C	G	G	.	G	.	.	-	-	-	-	-	C	.	.	.	A
Ab21	-	-	.	M	S	.	S	.	.	-	-	.	C	.	.	-	-	.	Y	S	C	.	.	G	-	C	-	-	-	-	-	-	C	.	G	.	G	R	M	-	-	-	-	-	C	.	.	.	A
B22	-	-	.	.	.	.	.	.	.	-	-	.	S	.	.	-	-	S	.	.	T	.	.	C	S	C	-	-	-	-	-	-	C	G	G	.	G	.	.	-	-	-	-	-	C	Y	.	.	C
B24	-	-	.	.	.	.	.	.	.	-	-	.	C	.	.	-	-	.	.	.	C	.	.	G	-	C	-	-	-	-	-	-	C	G	G	.	G	.	.	-	-	-	-	-	-	-	-	-	-
B25	-	-	.	.	.	.	.	.	.	-	-	.	C	.	.	-	-	.	.	.	C	.	.	G	-	C	-	-	-	-	-	-	C	G	G	.	G	.	.	-	-	-	-	-	C	.	.	.	A
B26	-	-	.	.	.	.	.	.	.	-	-	.	C	.	.	-	-	.	.	.	C	.	.	G	-	C	-	-	-	-	-	-	C	G	G	.	G	.	.	-	-	-	-	-	C	.	.	.	A
B27	-	-	M	.	M	.	.	.	K	C	T	.	.	M	S	-	-	.	.	K	S	.	M	G	-	.	-	-	-	-	-	-	C	K	G	.	G	.	.	-	-	-	-	-	C	.	.	M	A
B28	-	-	.	.	.	.	.	.	.	-	-	.	C	.	.	-	-	.	.	.	C	.	.	G	-	C	-	-	-	-	-	-	C	G	G	.	G	.	.	-	-	-	-	-	C	.	.	.	A
B29	-	-	.	.	.	.	.	.	.	-	-	.	C	.	.	-	-	.	.	.	C	.	.	G	-	C	-	-	-	-	-	-	C	G	G	G	G	.	.	-	-	-	-	-	A	C	.	.	A
B30	-	-	.	.	.	.	.	.	.	-	-	.	.	M	S	-	-	.	.	.	-	.	S	C	S	C	-	-	-	-	-	-	S	G	G	R	G	.	.	-	-	-	-	-	C	.	.	.	-
B32	-	-	.	.	.	.	.	.	.	-	-	.	C	.	.	-	-	.	.	.	C	.	.	G	-	C	-	-	-	-	-	-	C	G	G	.	G	.	.	-	-	-	-	-	C	.	.	.	A
B33	-	-	.	.	.	.	.	.	.	-	-	.	C	.	.	-	-	.	.	.	C	.	.	G	-	C	-	-	-	-	-	-	C	G	G	.	G	.	.	C	T	-	C	A	A	C	.	.	T
B34	-	-	.	.	.	.	.	.	.	-	-	S	R	S	R	-	-	S	.	S	C	.	.	S	-	C	-	-	-	-	-	-	C	G	G	.	G	G	M	-	-	-	-	-	C	W	S	.	M
B35	-	-	Y	.	.	.	.	.	.	-	-	.	S	.	S	-	-	.	W	S	C	.	.	S	-	C	-	-	-	-	-	-	C	G	G	.	R	R	M	-	-	-	-	-	C	.	.	R	.
[truncated: 894 more rows]
[truncated: 29 more columns]

## Sheet: Singleton sites
Additional file 3
[truncated: 1,236 more rows]
[truncated: 33 more columns]
